# Supplementary material
Source: publisher figshare collection journal article supplement (https://acs.figshare.com/ndownloader/files/5286028)
Supplement: Supplementary file 1 [file 5286028]

 
data_mo_X8_14029_0m_a 
  
_audit_creation_method            SHELXL-2014 
_chemical_name_systematic 
; 
 ? 
; 
_chemical_name_common             ? 
_chemical_melting_point           ? 
_chemical_formula_moiety          ? 
_chemical_formula_sum 
 'C45 H38 P2' 
_chemical_formula_weight          640.69 
  
loop_ 
 _atom_type_symbol 
 _atom_type_description 
 _atom_type_scat_dispersion_real 
 _atom_type_scat_dispersion_imag 
 _atom_type_scat_source 
 'C'  'C'   0.0033   0.0016 
 'International Tables Vol C Tables 4.2.6.8 and 6.1.1.4' 
 'H'  'H'   0.0000   0.0000 
 'International Tables Vol C Tables 4.2.6.8 and 6.1.1.4' 
 'P'  'P'   0.1023   0.0942 
 'International Tables Vol C Tables 4.2.6.8 and 6.1.1.4' 
  
_space_group_crystal_system       monoclinic 
_space_group_IT_number            14 
_space_group_name_H-M_alt         'P 21/c' 
_space_group_name_Hall            '-P 2ybc' 
  
_shelx_space_group_comment 
; 
The symmetry employed for this shelxl refinement is uniquely defined 
by the following loop, which should always be used as a source of 
symmetry information in preference to the above space-group names. 
They are only intended as comments. 
; 
  
loop_ 
 _space_group_symop_operation_xyz 
 'x, y, z' 
 '-x, y+1/2, -z+1/2' 
 '-x, -y, -z' 
 'x, -y-1/2, z-1/2' 
  
_cell_length_a                    14.8855(8) 
_cell_length_b                    11.3406(6) 
_cell_length_c                    20.3764(11) 
_cell_angle_alpha                 90 
_cell_angle_beta                  94.0410(11) 
_cell_angle_gamma                 90 
_cell_volume                      3431.2(3) 
_cell_formula_units_Z             4 
_cell_measurement_temperature     100(2) 
_cell_measurement_reflns_used     1765 
_cell_measurement_theta_min       2.51 
_cell_measurement_theta_max       26.91 
  
_exptl_crystal_description        block 
_exptl_crystal_colour             colorless 
_exptl_crystal_density_meas       ? 
_exptl_crystal_density_method     'not measured' 
_exptl_crystal_density_diffrn     1.240 
_exptl_crystal_F_000              1352 
_exptl_transmission_factor_min    0.6955 
_exptl_transmission_factor_max    0.7461 
_exptl_crystal_size_max           0.100 
_exptl_crystal_size_mid           0.090 
_exptl_crystal_size_min           0.080 
_exptl_absorpt_coefficient_mu     0.159 
_shelx_estimated_absorpt_T_min    0.984 
_shelx_estimated_absorpt_T_max    0.987 
_exptl_absorpt_correction_type    multi-scan 
_exptl_absorpt_correction_T_min   0.6991 
_exptl_absorpt_correction_T_max   0.7457 
_exptl_absorpt_process_details    'SADABS (Sheldrick, 2009)' 
  
_exptl_special_details 
; 
 Bruker X8 Kappa DUO four-circle diffractometer, Bruker APEX2 CCD. 
 The instrument was purchased with the help of funding from the 
 National Science Foundation (NSF) under Grant Number 
 CHE-0946721.  Please acknowledge this grant in all publications 
 of this structure. 
; 
  
_diffrn_ambient_temperature       100(2) 
_diffrn_radiation_wavelength      0.71073 
_diffrn_radiation_type            MoK\a 
_diffrn_source                    'I\mS micro-focus sealed tube, multilayer optics' 
_diffrn_measurement_device_type   'Bruker Smart APEX2 CCD' 
_diffrn_measurement_method        '\f and \w scans' 
_diffrn_detector_area_resol_mean  8.3 
_diffrn_reflns_number             68942 
_diffrn_reflns_av_unetI/netI      0.0353 
_diffrn_reflns_av_R_equivalents   0.0618 
_diffrn_reflns_limit_h_min        -19 
_diffrn_reflns_limit_h_max        19 
_diffrn_reflns_limit_k_min        -15 
_diffrn_reflns_limit_k_max        15 
_diffrn_reflns_limit_l_min        -27 
_diffrn_reflns_limit_l_max        27 
_diffrn_reflns_theta_min          1.371 
_diffrn_reflns_theta_max          28.471 
_diffrn_reflns_theta_full         25.242 
_diffrn_measured_fraction_theta_max   0.999 
_diffrn_measured_fraction_theta_full  1.000 
_diffrn_reflns_Laue_measured_fraction_max    0.999 
_diffrn_reflns_Laue_measured_fraction_full   1.000 
_diffrn_reflns_point_group_measured_fraction_max   0.999 
_diffrn_reflns_point_group_measured_fraction_full  1.000 
_reflns_number_total              8659 
_reflns_number_gt                 6882 
_reflns_threshold_expression      'I > 2\s(I)' 
_reflns_Friedel_coverage          0.000 
_reflns_Friedel_fraction_max      . 
_reflns_Friedel_fraction_full     . 
  
_reflns_special_details 
; 
 Reflections were merged by SHELXL according to the crystal 
 class for the calculation of statistics and refinement. 
  
 _reflns_Friedel_fraction is defined as the number of unique 
 Friedel pairs measured divided by the number that would be 
 possible theoretically, ignoring centric projections and 
 systematic absences. 
; 
  
_computing_data_collection        'APEX2 v2011.4.0 (Bruker-AXS, 2011)' 
_computing_cell_refinement        'SAINT 7.46A (Bruker-AXS, 2011)' 
_computing_data_reduction         'SAINT 7.46A (Bruker-AXS, 2011)' 
_computing_structure_solution     'SHELXS-97 (Sheldrick, 2008)' 
_computing_structure_refinement   'SHELXL-2014 (Sheldrick, 2014)' 
_computing_molecular_graphics     'Bruker SHELXTL' 
_computing_publication_material   'Bruker SHELXTL' 
  
_refine_special_details 
; 
 Refinement of F^2^ against ALL reflections.  The weighted R-factor wR and 
 goodness of fit S are based on F^2^, conventional R-factors R are based 
 on F, with F set to zero for negative F^2^. The threshold expression of 
 F^2^ > 2sigma(F^2^) is used only for calculating R-factors(gt) etc. and is 
 not relevant to the choice of reflections for refinement.  R-factors based 
 on F^2^ are statistically about twice as large as those based on F, and R- 
 factors based on ALL data will be even larger. 
; 
_refine_ls_structure_factor_coef  Fsqd 
_refine_ls_matrix_type            full 
_refine_ls_weighting_scheme       calc 
_refine_ls_weighting_details 
'w=1/[\s^2^(Fo^2^)+(0.0356P)^2^+2.2809P] where P=(Fo^2^+2Fc^2^)/3' 
_atom_sites_solution_primary      direct 
_atom_sites_solution_secondary    difmap 
_atom_sites_solution_hydrogens    geom 
_refine_ls_hydrogen_treatment     constr 
_refine_ls_extinction_method      none 
_refine_ls_extinction_coef        . 
_refine_ls_number_reflns          8659 
_refine_ls_number_parameters      534 
_refine_ls_number_restraints      748 
_refine_ls_R_factor_all           0.0559 
_refine_ls_R_factor_gt            0.0400 
_refine_ls_wR_factor_ref          0.1015 
_refine_ls_wR_factor_gt           0.0927 
_refine_ls_goodness_of_fit_ref    1.039 
_refine_ls_restrained_S_all       1.002 
_refine_ls_shift/su_max           0.001 
_refine_ls_shift/su_mean          0.000 
  
loop_ 
 _atom_site_label 
 _atom_site_type_symbol 
 _atom_site_fract_x 
 _atom_site_fract_y 
 _atom_site_fract_z 
 _atom_site_U_iso_or_equiv 
 _atom_site_adp_type 
 _atom_site_occupancy 
 _atom_site_site_symmetry_order 
 _atom_site_calc_flag 
 _atom_site_refinement_flags_posn 
 _atom_site_refinement_flags_adp 
 _atom_site_refinement_flags_occupancy 
 _atom_site_disorder_assembly 
 _atom_site_disorder_group 
P1 P 0.71523(2) 1.00436(3) 0.25522(2) 0.01430(9) Uani 1 1 d . U . . . 
P2 P 0.65512(2) 0.97038(3) 0.39071(2) 0.01295(9) Uani 1 1 d . U . . . 
C1 C 0.73715(10) 0.96458(14) 0.33747(7) 0.0166(3) Uani 1 1 d . U . . . 
H1 H 0.7959 0.9394 0.3525 0.020 Uiso 1 1 calc R U . . . 
C01 C 0.84637(9) 0.85266(13) 0.23169(7) 0.0140(3) Uani 1 1 d . U . . . 
C02 C 0.88676(10) 0.74724(13) 0.25037(7) 0.0168(3) Uani 1 1 d . U . . . 
H02 H 0.8570 0.6746 0.2406 0.020 Uiso 1 1 calc R U . . . 
C03 C 0.97230(10) 0.74885(14) 0.28388(7) 0.0184(3) Uani 1 1 d . U . . . 
H03 H 1.0003 0.6768 0.2977 0.022 Uiso 1 1 calc R U . . . 
C04 C 1.01628(10) 0.85478(14) 0.29702(8) 0.0186(3) Uani 1 1 d . U . . . 
H04 H 1.0749 0.8547 0.3188 0.022 Uiso 1 1 calc R U . . . 
C05 C 0.97527(10) 0.96212(13) 0.27857(7) 0.0164(3) Uani 1 1 d . U . . . 
H05 H 1.0053 1.0347 0.2880 0.020 Uiso 1 1 calc R U . . . 
C06 C 0.89018(9) 0.96051(13) 0.24643(7) 0.0140(3) Uani 1 1 d . U . . . 
C07 C 0.80331(9) 1.05377(13) 0.15350(7) 0.0145(3) Uani 1 1 d . U . . . 
C08 C 0.81462(10) 1.13604(14) 0.10436(8) 0.0187(3) Uani 1 1 d . U . . . 
H08 H 0.8451 1.2081 0.1143 0.022 Uiso 1 1 calc R U . . . 
C09 C 0.78066(11) 1.11172(15) 0.04014(8) 0.0214(3) Uani 1 1 d . U . . . 
H09 H 0.7883 1.1673 0.0061 0.026 Uiso 1 1 calc R U . . . 
C10 C 0.73573(10) 1.00632(15) 0.02586(8) 0.0210(3) Uani 1 1 d . U . . . 
H10 H 0.7119 0.9910 -0.0178 0.025 Uiso 1 1 calc R U . . . 
C11 C 0.72530(10) 0.92277(14) 0.07503(7) 0.0181(3) Uani 1 1 d . U . . . 
H11 H 0.6952 0.8505 0.0649 0.022 Uiso 1 1 calc R U . . . 
C12 C 0.75932(9) 0.94629(13) 0.13877(7) 0.0150(3) Uani 1 1 d . U . . . 
C13 C 0.75282(9) 0.87520(13) 0.20096(7) 0.0148(3) Uani 1 1 d . U . . . 
H13 H 0.7117 0.8054 0.1975 0.018 Uiso 1 1 calc R U . . . 
C14 C 0.82800(9) 1.06186(13) 0.22655(7) 0.0144(3) Uani 1 1 d . U . . . 
H14 H 0.8474 1.1414 0.2434 0.017 Uiso 1 1 calc R U . . . 
C211 C 0.58696(9) 1.10194(13) 0.38058(7) 0.0143(3) Uani 1 1 d . U . . . 
C212 C 0.62970(10) 1.21030(14) 0.37274(8) 0.0191(3) Uani 1 1 d . U . . . 
H212 H 0.6932 1.2134 0.3708 0.023 Uiso 1 1 calc R U . . . 
C213 C 0.57937(11) 1.31350(14) 0.36776(8) 0.0228(3) Uani 1 1 d . U . . . 
H213 H 0.6087 1.3873 0.3635 0.027 Uiso 1 1 calc R U . . . 
C214 C 0.48616(11) 1.30889(14) 0.36904(8) 0.0224(3) Uani 1 1 d . U . . . 
H214 H 0.4516 1.3792 0.3645 0.027 Uiso 1 1 calc R U . . . 
C215 C 0.44382(10) 1.20177(14) 0.37694(8) 0.0202(3) Uani 1 1 d . U . . . 
H215 H 0.3801 1.1988 0.3778 0.024 Uiso 1 1 calc R U . . . 
C216 C 0.49380(10) 1.09855(14) 0.38355(7) 0.0166(3) Uani 1 1 d . U . . . 
H216 H 0.4644 1.0256 0.3901 0.020 Uiso 1 1 calc R U . . . 
C221 C 0.57279(9) 0.85098(13) 0.38785(7) 0.0151(3) Uani 1 1 d . U . . . 
C222 C 0.52991(10) 0.82154(14) 0.32660(8) 0.0198(3) Uani 1 1 d . U . . . 
H222 H 0.5455 0.8619 0.2882 0.024 Uiso 1 1 calc R U . . . 
C223 C 0.46470(10) 0.73367(14) 0.32176(8) 0.0225(3) Uani 1 1 d . U . . . 
H223 H 0.4356 0.7144 0.2801 0.027 Uiso 1 1 calc R U . . . 
C224 C 0.44208(11) 0.67398(15) 0.37782(9) 0.0235(3) Uani 1 1 d . U . . . 
H224 H 0.3975 0.6139 0.3745 0.028 Uiso 1 1 calc R U . . . 
C225 C 0.48452(11) 0.70218(15) 0.43862(9) 0.0247(3) Uani 1 1 d . U . . . 
H225 H 0.4692 0.6610 0.4769 0.030 Uiso 1 1 calc R U . . . 
C226 C 0.54949(10) 0.79072(14) 0.44366(8) 0.0198(3) Uani 1 1 d . U . . . 
H226 H 0.5781 0.8101 0.4854 0.024 Uiso 1 1 calc R U . . . 
C231 C 0.70475(9) 0.97155(13) 0.47434(7) 0.0141(3) Uani 1 1 d . U . . . 
C232 C 0.76685(10) 0.88425(14) 0.49471(8) 0.0190(3) Uani 1 1 d . U . . . 
H232 H 0.7815 0.8238 0.4650 0.023 Uiso 1 1 calc R U . . . 
C233 C 0.80723(10) 0.88549(15) 0.55826(8) 0.0211(3) Uani 1 1 d . U . . . 
H233 H 0.8493 0.8260 0.5720 0.025 Uiso 1 1 calc R U . . . 
C234 C 0.78596(10) 0.97384(14) 0.60155(8) 0.0208(3) Uani 1 1 d . U . . . 
H234 H 0.8136 0.9747 0.6450 0.025 Uiso 1 1 calc R U . . . 
C235 C 0.72471(11) 1.06068(14) 0.58177(8) 0.0215(3) Uani 1 1 d . U . . . 
H235 H 0.7106 1.1212 0.6116 0.026 Uiso 1 1 calc R U . . . 
C236 C 0.68365(10) 1.05974(14) 0.51828(7) 0.0184(3) Uani 1 1 d . U . . . 
H236 H 0.6413 1.1192 0.5049 0.022 Uiso 1 1 calc R U . . . 
C1S C 0.7966(13) 0.3974(16) 0.3073(10) 0.020(2) Uani 0.37(3) 1 d D U P A 1 
H1S H 0.8342 0.3297 0.3100 0.024 Uiso 0.37(3) 1 calc R U P A 1 
C2S C 0.7296(15) 0.4069(17) 0.2570(10) 0.023(3) Uani 0.37(3) 1 d D U P A 1 
H2S H 0.7213 0.3460 0.2251 0.028 Uiso 0.37(3) 1 calc R U P A 1 
C3S C 0.6747(13) 0.5057(16) 0.2534(9) 0.025(2) Uani 0.37(3) 1 d D U P A 1 
H3S H 0.6290 0.5130 0.2187 0.030 Uiso 0.37(3) 1 calc R U P A 1 
C4S C 0.6863(11) 0.5938(14) 0.3004(9) 0.025(2) Uani 0.37(3) 1 d D U P A 1 
H4S H 0.6478 0.6607 0.2984 0.030 Uiso 0.37(3) 1 calc R U P A 1 
C5S C 0.7536(12) 0.5843(13) 0.3500(8) 0.0230(19) Uani 0.37(3) 1 d D U P A 1 
H5S H 0.7620 0.6454 0.3817 0.028 Uiso 0.37(3) 1 calc R U P A 1 
C6S C 0.8092(13) 0.4864(16) 0.3540(10) 0.023(2) Uani 0.37(3) 1 d D U P A 1 
H6S H 0.8555 0.4800 0.3883 0.028 Uiso 0.37(3) 1 calc R U P A 1 
C1T C 0.8014(9) 0.4090(11) 0.3128(6) 0.030(2) Uani 0.63(3) 1 d D U P A 2 
H1T H 0.8468 0.3513 0.3220 0.036 Uiso 0.63(3) 1 calc R U P A 2 
C2T C 0.7404(9) 0.3960(11) 0.2587(7) 0.0267(17) Uani 0.63(3) 1 d D U P A 2 
H2T H 0.7429 0.3284 0.2313 0.032 Uiso 0.63(3) 1 calc R U P A 2 
C3T C 0.6752(8) 0.4825(10) 0.2445(6) 0.0240(13) Uani 0.63(3) 1 d D U P A 2 
H3T H 0.6331 0.4739 0.2076 0.029 Uiso 0.63(3) 1 calc R U P A 2 
C4T C 0.6723(7) 0.5809(8) 0.2845(6) 0.0261(13) Uani 0.63(3) 1 d D U P A 2 
H4T H 0.6291 0.6409 0.2743 0.031 Uiso 0.63(3) 1 calc R U P A 2 
C5T C 0.7322(8) 0.5921(9) 0.3394(6) 0.0325(16) Uani 0.63(3) 1 d D U P A 2 
H5T H 0.7292 0.6591 0.3672 0.039 Uiso 0.63(3) 1 calc R U P A 2 
C6T C 0.7961(9) 0.5061(11) 0.3536(6) 0.0316(17) Uani 0.63(3) 1 d D U P A 2 
H6T H 0.8367 0.5135 0.3915 0.038 Uiso 0.63(3) 1 calc R U P A 2 
C1U C 1.0349(9) 0.3525(10) 0.4754(6) 0.0239(15) Uani 0.52(2) 1 d D U P B 1 
H1U H 1.0657 0.4254 0.4820 0.029 Uiso 0.52(2) 1 calc R U P B 1 
C2U C 1.0233(9) 0.2778(11) 0.5282(5) 0.0277(16) Uani 0.52(2) 1 d D U P B 1 
H2U H 1.0476 0.2986 0.5709 0.033 Uiso 0.52(2) 1 calc R U P B 1 
C3U C 0.9764(10) 0.1733(10) 0.5185(6) 0.0280(17) Uani 0.52(2) 1 d D U P B 1 
H3U H 0.9675 0.1232 0.5549 0.034 Uiso 0.52(2) 1 calc R U P B 1 
C4U C 0.9426(11) 0.1415(11) 0.4567(6) 0.0286(18) Uani 0.52(2) 1 d D U P B 1 
H4U H 0.9092 0.0704 0.4506 0.034 Uiso 0.52(2) 1 calc R U P B 1 
C5U C 0.9567(11) 0.2124(13) 0.4030(6) 0.028(2) Uani 0.52(2) 1 d D U P B 1 
H5U H 0.9362 0.1882 0.3599 0.034 Uiso 0.52(2) 1 calc R U P B 1 
C6U C 1.0012(11) 0.3194(11) 0.4129(6) 0.0277(19) Uani 0.52(2) 1 d D U P B 1 
H6U H 1.0086 0.3702 0.3766 0.033 Uiso 0.52(2) 1 calc R U P B 1 
C1V C 1.0343(10) 0.3560(11) 0.4568(7) 0.0265(18) Uani 0.48(2) 1 d D U P B 2 
H1V H 1.0647 0.4288 0.4521 0.032 Uiso 0.48(2) 1 calc R U P B 2 
C2V C 1.0321(10) 0.3046(12) 0.5183(6) 0.0283(19) Uani 0.48(2) 1 d D U P B 2 
H2V H 1.0599 0.3433 0.5558 0.034 Uiso 0.48(2) 1 calc R U P B 2 
C3V C 0.9898(10) 0.1978(13) 0.5255(5) 0.0269(19) Uani 0.48(2) 1 d D U P B 2 
H3V H 0.9906 0.1616 0.5676 0.032 Uiso 0.48(2) 1 calc R U P B 2 
C4V C 0.9462(12) 0.1433(12) 0.4719(6) 0.0264(19) Uani 0.48(2) 1 d D U P B 2 
H4V H 0.9172 0.0696 0.4770 0.032 Uiso 0.48(2) 1 calc R U P B 2 
C5V C 0.9449(12) 0.1965(13) 0.4103(6) 0.0220(17) Uani 0.48(2) 1 d D U P B 2 
H5V H 0.9118 0.1616 0.3738 0.026 Uiso 0.48(2) 1 calc R U P B 2 
C6V C 0.9922(11) 0.3011(12) 0.4021(6) 0.0226(17) Uani 0.48(2) 1 d D U P B 2 
H6V H 0.9955 0.3343 0.3596 0.027 Uiso 0.48(2) 1 calc R U P B 2 
  
loop_ 
 _atom_site_aniso_label 
 _atom_site_aniso_U_11 
 _atom_site_aniso_U_22 
 _atom_site_aniso_U_33 
 _atom_site_aniso_U_23 
 _atom_site_aniso_U_13 
 _atom_site_aniso_U_12 
P1 0.01199(17) 0.01688(18) 0.01413(18) 0.00071(14) 0.00163(13) 0.00152(14) 
P2 0.01170(16) 0.01437(18) 0.01281(17) -0.00016(13) 0.00114(13) 0.00100(13) 
C1 0.0135(6) 0.0217(8) 0.0149(7) 0.0012(6) 0.0031(5) 0.0027(6) 
C01 0.0140(6) 0.0161(7) 0.0125(6) -0.0007(5) 0.0040(5) -0.0004(5) 
C02 0.0198(7) 0.0146(7) 0.0162(7) -0.0010(6) 0.0039(6) 0.0001(6) 
C03 0.0207(7) 0.0164(7) 0.0185(7) 0.0006(6) 0.0037(6) 0.0052(6) 
C04 0.0141(7) 0.0228(8) 0.0189(7) 0.0006(6) 0.0011(5) 0.0021(6) 
C05 0.0153(7) 0.0175(7) 0.0166(7) -0.0006(6) 0.0015(5) -0.0020(5) 
C06 0.0130(6) 0.0154(7) 0.0140(7) 0.0004(5) 0.0044(5) 0.0003(5) 
C07 0.0124(6) 0.0154(7) 0.0158(7) 0.0002(5) 0.0020(5) 0.0009(5) 
C08 0.0181(7) 0.0170(7) 0.0211(8) 0.0022(6) 0.0020(6) -0.0013(6) 
C09 0.0234(8) 0.0238(8) 0.0172(7) 0.0060(6) 0.0028(6) -0.0005(6) 
C10 0.0209(7) 0.0277(8) 0.0144(7) 0.0005(6) 0.0010(6) 0.0011(6) 
C11 0.0160(7) 0.0208(8) 0.0176(7) -0.0021(6) 0.0016(5) -0.0013(6) 
C12 0.0126(6) 0.0162(7) 0.0165(7) 0.0004(5) 0.0031(5) 0.0013(5) 
C13 0.0137(6) 0.0153(7) 0.0155(7) 0.0005(5) 0.0018(5) -0.0018(5) 
C14 0.0122(6) 0.0149(7) 0.0163(7) -0.0005(5) 0.0015(5) -0.0005(5) 
C211 0.0148(6) 0.0161(7) 0.0120(6) 0.0009(5) 0.0009(5) 0.0013(5) 
C212 0.0181(7) 0.0181(7) 0.0215(8) 0.0016(6) 0.0043(6) 0.0005(6) 
C213 0.0275(8) 0.0165(7) 0.0250(8) 0.0030(6) 0.0070(6) 0.0011(6) 
C214 0.0264(8) 0.0190(8) 0.0221(8) 0.0021(6) 0.0027(6) 0.0090(6) 
C215 0.0172(7) 0.0236(8) 0.0197(8) -0.0006(6) 0.0005(6) 0.0053(6) 
C216 0.0161(7) 0.0179(7) 0.0159(7) -0.0013(6) 0.0007(5) 0.0007(5) 
C221 0.0129(6) 0.0148(7) 0.0177(7) -0.0016(5) 0.0017(5) 0.0018(5) 
C222 0.0207(7) 0.0201(8) 0.0185(7) -0.0007(6) 0.0013(6) -0.0001(6) 
C223 0.0189(7) 0.0234(8) 0.0245(8) -0.0051(6) -0.0029(6) -0.0017(6) 
C224 0.0177(7) 0.0195(8) 0.0332(9) -0.0028(7) 0.0014(6) -0.0033(6) 
C225 0.0249(8) 0.0232(8) 0.0262(8) 0.0037(7) 0.0035(7) -0.0049(7) 
C226 0.0194(7) 0.0213(8) 0.0187(7) 0.0000(6) 0.0013(6) -0.0023(6) 
C231 0.0125(6) 0.0159(7) 0.0140(6) 0.0006(5) 0.0021(5) -0.0019(5) 
C232 0.0183(7) 0.0198(7) 0.0188(7) -0.0014(6) 0.0005(6) 0.0039(6) 
C233 0.0184(7) 0.0232(8) 0.0213(8) 0.0023(6) -0.0019(6) 0.0033(6) 
C234 0.0205(7) 0.0248(8) 0.0166(7) 0.0005(6) -0.0030(6) -0.0027(6) 
C235 0.0275(8) 0.0196(8) 0.0172(7) -0.0038(6) 0.0003(6) 0.0003(6) 
C236 0.0212(7) 0.0169(7) 0.0169(7) -0.0002(6) 0.0007(6) 0.0025(6) 
C1S 0.021(4) 0.021(3) 0.020(4) -0.004(3) 0.008(3) 0.004(3) 
C2S 0.025(5) 0.027(5) 0.017(4) 0.002(3) 0.000(3) 0.001(3) 
C3S 0.023(3) 0.027(5) 0.025(5) 0.005(3) 0.001(3) 0.006(3) 
C4S 0.026(5) 0.022(4) 0.028(6) 0.004(3) 0.005(3) 0.006(3) 
C5S 0.024(5) 0.018(3) 0.027(4) 0.002(3) 0.003(3) 0.000(3) 
C6S 0.021(4) 0.021(4) 0.028(4) -0.001(3) 0.001(3) 0.010(3) 
C1T 0.025(3) 0.042(4) 0.022(3) 0.007(3) -0.003(2) 0.005(3) 
C2T 0.025(3) 0.033(3) 0.023(3) 0.005(2) 0.0043(19) 0.014(2) 
C3T 0.025(2) 0.026(3) 0.022(3) 0.003(2) 0.0050(17) 0.006(2) 
C4T 0.029(3) 0.024(2) 0.027(4) 0.007(2) 0.010(2) 0.003(2) 
C5T 0.034(4) 0.030(3) 0.034(4) -0.002(2) 0.008(2) -0.004(2) 
C6T 0.031(4) 0.039(5) 0.025(2) 0.000(3) 0.003(2) -0.007(3) 
C1U 0.021(2) 0.024(2) 0.028(4) -0.007(3) 0.007(3) 0.0018(17) 
C2U 0.029(3) 0.032(4) 0.023(2) -0.003(2) 0.007(2) 0.003(3) 
C3U 0.026(4) 0.023(3) 0.036(4) 0.000(2) 0.008(3) 0.000(2) 
C4U 0.024(3) 0.024(3) 0.037(4) -0.007(3) -0.004(4) 0.0031(19) 
C5U 0.025(5) 0.030(4) 0.029(3) -0.005(2) -0.003(3) 0.010(3) 
C6U 0.032(4) 0.022(3) 0.030(4) 0.001(3) 0.004(3) 0.011(2) 
C1V 0.022(2) 0.026(2) 0.032(4) -0.004(3) 0.006(4) 0.0023(18) 
C2V 0.025(3) 0.031(5) 0.029(4) -0.010(3) 0.001(3) 0.003(3) 
C3V 0.025(4) 0.038(5) 0.018(2) -0.003(3) 0.002(2) 0.005(3) 
C4V 0.029(4) 0.025(3) 0.025(4) 0.005(3) 0.005(3) 0.002(2) 
C5V 0.018(3) 0.024(3) 0.024(3) -0.002(2) 0.002(2) 0.000(2) 
C6V 0.019(3) 0.027(4) 0.021(3) -0.002(2) 0.004(2) 0.005(3) 
  
_geom_special_details 
; 
 All esds (except the esd in the dihedral angle between two l.s. planes) 
 are estimated using the full covariance matrix.  The cell esds are taken 
 into account individually in the estimation of esds in distances, angles 
 and torsion angles; correlations between esds in cell parameters are only 
 used when they are defined by crystal symmetry.  An approximate (isotropic) 
 treatment of cell esds is used for estimating esds involving l.s. planes. 
; 
  
loop_ 
 _geom_bond_atom_site_label_1 
 _geom_bond_atom_site_label_2 
 _geom_bond_distance 
 _geom_bond_site_symmetry_2 
 _geom_bond_publ_flag 
P1 C1 1.7442(15) . ? 
P1 C14 1.9294(14) . ? 
P1 C13 1.9412(15) . ? 
P2 C1 1.6907(15) . ? 
P2 C211 1.8079(15) . ? 
P2 C231 1.8089(15) . ? 
P2 C221 1.8245(15) . ? 
C01 C02 1.380(2) . ? 
C01 C06 1.408(2) . ? 
C01 C13 1.5080(19) . ? 
C02 C03 1.402(2) . ? 
C03 C04 1.385(2) . ? 
C04 C05 1.401(2) . ? 
C05 C06 1.384(2) . ? 
C06 C14 1.513(2) . ? 
C07 C08 1.387(2) . ? 
C07 C12 1.406(2) . ? 
C07 C14 1.511(2) . ? 
C08 C09 1.397(2) . ? 
C09 C10 1.390(2) . ? 
C10 C11 1.396(2) . ? 
C11 C12 1.386(2) . ? 
C12 C13 1.511(2) . ? 
C211 C216 1.393(2) . ? 
C211 C212 1.398(2) . ? 
C212 C213 1.389(2) . ? 
C213 C214 1.391(2) . ? 
C214 C215 1.383(2) . ? 
C215 C216 1.388(2) . ? 
C221 C226 1.391(2) . ? 
C221 C222 1.401(2) . ? 
C222 C223 1.390(2) . ? 
C223 C224 1.390(2) . ? 
C224 C225 1.388(2) . ? 
C225 C226 1.393(2) . ? 
C231 C236 1.393(2) . ? 
C231 C232 1.398(2) . ? 
C232 C233 1.389(2) . ? 
C233 C234 1.386(2) . ? 
C234 C235 1.383(2) . ? 
C235 C236 1.391(2) . ? 
C1S C2S 1.382(11) . ? 
C1S C6S 1.390(11) . ? 
C2S C3S 1.386(11) . ? 
C3S C4S 1.386(9) . ? 
C4S C5S 1.377(9) . ? 
C5S C6S 1.384(9) . ? 
C1T C6T 1.385(8) . ? 
C1T C2T 1.387(7) . ? 
C2T C3T 1.395(7) . ? 
C3T C4T 1.385(6) . ? 
C4T C5T 1.386(6) . ? 
C5T C6T 1.379(7) . ? 
C1U C6U 1.385(7) . ? 
C1U C2U 1.390(7) . ? 
C2U C3U 1.383(7) . ? 
C3U C4U 1.372(8) . ? 
C4U C5U 1.385(8) . ? 
C5U C6U 1.391(8) . ? 
C1V C2V 1.384(8) . ? 
C1V C6V 1.387(8) . ? 
C2V C3V 1.378(8) . ? 
C3V C4V 1.376(8) . ? 
C4V C5V 1.392(8) . ? 
C5V C6V 1.395(9) . ? 
  
loop_ 
 _geom_angle_atom_site_label_1 
 _geom_angle_atom_site_label_2 
 _geom_angle_atom_site_label_3 
 _geom_angle 
 _geom_angle_site_symmetry_1 
 _geom_angle_site_symmetry_3 
 _geom_angle_publ_flag 
C1 P1 C14 105.69(7) . . ? 
C1 P1 C13 108.08(7) . . ? 
C14 P1 C13 77.92(6) . . ? 
C1 P2 C211 112.56(7) . . ? 
C1 P2 C231 109.83(7) . . ? 
C211 P2 C231 106.87(7) . . ? 
C1 P2 C221 117.68(7) . . ? 
C211 P2 C221 103.79(7) . . ? 
C231 P2 C221 105.33(7) . . ? 
P2 C1 P1 120.79(9) . . ? 
C02 C01 C06 120.50(13) . . ? 
C02 C01 C13 129.29(13) . . ? 
C06 C01 C13 109.97(12) . . ? 
C01 C02 C03 119.10(14) . . ? 
C04 C03 C02 120.40(14) . . ? 
C03 C04 C05 120.70(14) . . ? 
C06 C05 C04 118.83(14) . . ? 
C05 C06 C01 120.44(13) . . ? 
C05 C06 C14 129.70(13) . . ? 
C01 C06 C14 109.71(12) . . ? 
C08 C07 C12 120.49(14) . . ? 
C08 C07 C14 129.55(14) . . ? 
C12 C07 C14 109.89(12) . . ? 
C07 C08 C09 119.27(14) . . ? 
C10 C09 C08 120.19(14) . . ? 
C09 C10 C11 120.63(14) . . ? 
C12 C11 C10 119.36(14) . . ? 
C11 C12 C07 120.04(14) . . ? 
C11 C12 C13 129.97(14) . . ? 
C07 C12 C13 109.88(12) . . ? 
C01 C13 C12 109.09(11) . . ? 
C01 C13 P1 100.73(9) . . ? 
C12 C13 P1 96.50(9) . . ? 
C07 C14 C06 108.63(12) . . ? 
C07 C14 P1 96.97(9) . . ? 
C06 C14 P1 101.02(9) . . ? 
C216 C211 C212 119.45(14) . . ? 
C216 C211 P2 121.65(11) . . ? 
C212 C211 P2 118.83(11) . . ? 
C213 C212 C211 120.09(14) . . ? 
C212 C213 C214 120.04(15) . . ? 
C215 C214 C213 119.91(14) . . ? 
C214 C215 C216 120.42(14) . . ? 
C215 C216 C211 120.06(14) . . ? 
C226 C221 C222 119.12(14) . . ? 
C226 C221 P2 122.95(11) . . ? 
C222 C221 P2 117.91(11) . . ? 
C223 C222 C221 120.40(15) . . ? 
C224 C223 C222 119.96(15) . . ? 
C225 C224 C223 120.01(15) . . ? 
C224 C225 C226 120.13(15) . . ? 
C221 C226 C225 120.37(15) . . ? 
C236 C231 C232 119.48(14) . . ? 
C236 C231 P2 121.01(11) . . ? 
C232 C231 P2 119.49(11) . . ? 
C233 C232 C231 120.23(14) . . ? 
C234 C233 C232 119.83(15) . . ? 
C235 C234 C233 120.32(14) . . ? 
C234 C235 C236 120.20(15) . . ? 
C235 C236 C231 119.93(14) . . ? 
C2S C1S C6S 120.4(12) . . ? 
C1S C2S C3S 119.6(12) . . ? 
C4S C3S C2S 120.2(11) . . ? 
C5S C4S C3S 119.9(10) . . ? 
C4S C5S C6S 120.5(10) . . ? 
C5S C6S C1S 119.4(11) . . ? 
C6T C1T C2T 120.1(8) . . ? 
C1T C2T C3T 119.7(8) . . ? 
C4T C3T C2T 119.7(7) . . ? 
C3T C4T C5T 120.3(6) . . ? 
C6T C5T C4T 120.0(7) . . ? 
C5T C6T C1T 120.2(7) . . ? 
C6U C1U C2U 119.3(8) . . ? 
C3U C2U C1U 120.1(8) . . ? 
C4U C3U C2U 120.3(8) . . ? 
C3U C4U C5U 120.4(9) . . ? 
C4U C5U C6U 119.3(9) . . ? 
C1U C6U C5U 120.5(9) . . ? 
C2V C1V C6V 120.0(9) . . ? 
C3V C2V C1V 120.4(8) . . ? 
C4V C3V C2V 120.3(8) . . ? 
C3V C4V C5V 119.8(9) . . ? 
C4V C5V C6V 120.1(10) . . ? 
C1V C6V C5V 119.3(9) . . ? 
  
_refine_diff_density_max    0.362 
_refine_diff_density_min   -0.376 
_refine_diff_density_rms    0.053 
  
_shelxl_version_number 2014-2 
  
_shelx_res_file 
; 
REM Solution 1  R1  0.112  Rweak  0.003,  Alpha = 0.0270  in P2(1)/c 
REM Formula:  C45 P2 
TITL mo_X8_14029_0m in P2(1)/c 
CELL  0.71073  14.8855  11.3406  20.3764   90.000   94.041   90.000 
ZERR    4.00   0.00080   0.00060   0.00110   0.0000   0.0011   0.0000 
LATT  1 
SYMM -X, 1/2+Y, 1/2-Z 
SFAC C H P 
UNIT 180 152 8 
TEMP -173.130 
SIZE 0.08 0.09 0.10 
  
L.S. 10 
BOND 
LIST 6 
FMAP 2 
PLAN 20 
DELU 
rigu 
acta 
  
WGHT    0.035600    2.280900 
FVAR       0.24122   0.37474   0.52319 
P1    3    0.715225    1.004362    0.255220    11.00000    0.01199    0.01688 = 
         0.01413    0.00071    0.00163    0.00152 
P2    3    0.655124    0.970378    0.390712    11.00000    0.01170    0.01437 = 
         0.01281   -0.00016    0.00114    0.00100 
C1    1    0.737147    0.964582    0.337475    11.00000    0.01355    0.02168 = 
         0.01489    0.00119    0.00307    0.00273 
AFIX  43 
H1    2    0.795876    0.939358    0.352543    11.00000   -1.20000 
AFIX   0 
C01   1    0.846374    0.852660    0.231694    11.00000    0.01398    0.01615 = 
         0.01246   -0.00071    0.00400   -0.00044 
C02   1    0.886763    0.747243    0.250366    11.00000    0.01978    0.01464 = 
         0.01621   -0.00096    0.00389    0.00008 
AFIX  43 
H02   2    0.857017    0.674552    0.240644    11.00000   -1.20000 
AFIX   0 
C03   1    0.972297    0.748846    0.283880    11.00000    0.02069    0.01638 = 
         0.01850    0.00063    0.00370    0.00516 
AFIX  43 
H03   2    1.000269    0.676846    0.297664    11.00000   -1.20000 
AFIX   0 
C04   1    1.016275    0.854778    0.297018    11.00000    0.01407    0.02278 = 
         0.01894    0.00058    0.00105    0.00207 
AFIX  43 
H04   2    1.074862    0.854654    0.318768    11.00000   -1.20000 
AFIX   0 
C05   1    0.975267    0.962120    0.278568    11.00000    0.01526    0.01746 = 
         0.01664   -0.00065    0.00147   -0.00195 
AFIX  43 
H05   2    1.005323    1.034719    0.287951    11.00000   -1.20000 
AFIX   0 
C06   1    0.890182    0.960511    0.246425    11.00000    0.01303    0.01540 = 
         0.01397    0.00035    0.00439    0.00027 
C07   1    0.803306    1.053773    0.153495    11.00000    0.01242    0.01537 = 
         0.01579    0.00019    0.00202    0.00087 
C08   1    0.814623    1.136036    0.104364    11.00000    0.01814    0.01705 = 
         0.02107    0.00220    0.00199   -0.00125 
AFIX  43 
H08   2    0.845136    1.208118    0.114294    11.00000   -1.20000 
AFIX   0 
C09   1    0.780663    1.111715    0.040138    11.00000    0.02342    0.02378 = 
         0.01722    0.00601    0.00277   -0.00048 
AFIX  43 
H09   2    0.788287    1.167343    0.006117    11.00000   -1.20000 
AFIX   0 
C10   1    0.735729    1.006316    0.025858    11.00000    0.02090    0.02767 = 
         0.01444    0.00048    0.00099    0.00109 
AFIX  43 
H10   2    0.711896    0.991028   -0.017791    11.00000   -1.20000 
AFIX   0 
C11   1    0.725303    0.922771    0.075032    11.00000    0.01601    0.02078 = 
         0.01765   -0.00207    0.00159   -0.00134 
AFIX  43 
H11   2    0.695184    0.850482    0.064923    11.00000   -1.20000 
AFIX   0 
C12   1    0.759320    0.946289    0.138769    11.00000    0.01259    0.01622 = 
         0.01648    0.00038    0.00310    0.00132 
C13   1    0.752819    0.875204    0.200955    11.00000    0.01366    0.01531 = 
         0.01550    0.00055    0.00181   -0.00177 
AFIX  13 
H13   2    0.711699    0.805412    0.197478    11.00000   -1.20000 
AFIX   0 
C14   1    0.827997    1.061858    0.226554    11.00000    0.01216    0.01489 = 
         0.01627   -0.00051    0.00151   -0.00049 
AFIX  13 
H14   2    0.847373    1.141370    0.243388    11.00000   -1.20000 
AFIX   0 
C211  1    0.586957    1.101936    0.380578    11.00000    0.01485    0.01611 = 
         0.01204    0.00090    0.00089    0.00125 
C212  1    0.629696    1.210305    0.372742    11.00000    0.01812    0.01815 = 
         0.02152    0.00163    0.00435    0.00050 
AFIX  43 
H212  2    0.693234    1.213379    0.370818    11.00000   -1.20000 
AFIX   0 
C213  1    0.579371    1.313502    0.367763    11.00000    0.02750    0.01653 = 
         0.02503    0.00299    0.00700    0.00114 
AFIX  43 
H213  2    0.608656    1.387252    0.363482    11.00000   -1.20000 
AFIX   0 
C214  1    0.486157    1.308894    0.369044    11.00000    0.02642    0.01899 = 
         0.02207    0.00209    0.00273    0.00903 
AFIX  43 
H214  2    0.451603    1.379221    0.364503    11.00000   -1.20000 
AFIX   0 
C215  1    0.443822    1.201767    0.376941    11.00000    0.01721    0.02356 = 
         0.01974   -0.00058    0.00051    0.00529 
AFIX  43 
H215  2    0.380141    1.198798    0.377845    11.00000   -1.20000 
AFIX   0 
C216  1    0.493798    1.098551    0.383554    11.00000    0.01612    0.01787 = 
         0.01591   -0.00128    0.00074    0.00067 
AFIX  43 
H216  2    0.464430    1.025555    0.390115    11.00000   -1.20000 
AFIX   0 
C221  1    0.572788    0.850984    0.387848    11.00000    0.01285    0.01484 = 
         0.01765   -0.00163    0.00172    0.00183 
C222  1    0.529912    0.821543    0.326599    11.00000    0.02072    0.02010 = 
         0.01848   -0.00071    0.00127   -0.00007 
AFIX  43 
H222  2    0.545520    0.861889    0.288159    11.00000   -1.20000 
AFIX   0 
C223  1    0.464695    0.733673    0.321759    11.00000    0.01890    0.02343 = 
         0.02453   -0.00510   -0.00290   -0.00173 
AFIX  43 
H223  2    0.435597    0.714430    0.280145    11.00000   -1.20000 
AFIX   0 
C224  1    0.442076    0.673983    0.377825    11.00000    0.01775    0.01952 = 
         0.03322   -0.00276    0.00137   -0.00326 
AFIX  43 
H224  2    0.397546    0.613860    0.374535    11.00000   -1.20000 
AFIX   0 
C225  1    0.484522    0.702181    0.438620    11.00000    0.02491    0.02316 = 
         0.02624    0.00373    0.00346   -0.00487 
AFIX  43 
H225  2    0.469236    0.661016    0.476880    11.00000   -1.20000 
AFIX   0 
C226  1    0.549495    0.790720    0.443656    11.00000    0.01936    0.02132 = 
         0.01873    0.00001    0.00128   -0.00228 
AFIX  43 
H226  2    0.578065    0.810070    0.485428    11.00000   -1.20000 
AFIX   0 
C231  1    0.704750    0.971555    0.474336    11.00000    0.01253    0.01589 = 
         0.01398    0.00057    0.00214   -0.00186 
C232  1    0.766847    0.884245    0.494709    11.00000    0.01829    0.01980 = 
         0.01884   -0.00135    0.00048    0.00385 
AFIX  43 
H232  2    0.781486    0.823827    0.464980    11.00000   -1.20000 
AFIX   0 
C233  1    0.807231    0.885492    0.558261    11.00000    0.01841    0.02324 = 
         0.02127    0.00230   -0.00187    0.00327 
AFIX  43 
H233  2    0.849326    0.825952    0.572031    11.00000   -1.20000 
AFIX   0 
C234  1    0.785957    0.973842    0.601550    11.00000    0.02048    0.02484 = 
         0.01658    0.00046   -0.00296   -0.00274 
AFIX  43 
H234  2    0.813596    0.974728    0.645017    11.00000   -1.20000 
AFIX   0 
C235  1    0.724709    1.060683    0.581774    11.00000    0.02753    0.01965 = 
         0.01717   -0.00384    0.00033    0.00028 
AFIX  43 
H235  2    0.710619    1.121171    0.611624    11.00000   -1.20000 
AFIX   0 
C236  1    0.683646    1.059742    0.518278    11.00000    0.02122    0.01687 = 
         0.01693   -0.00017    0.00073    0.00247 
AFIX  43 
H236  2    0.641259    1.119185    0.504911    11.00000   -1.20000 
AFIX   0 
rem ###################################################### 
part 1 
same c6s < c1s 
C1S   1    0.796576    0.397413    0.307301    21.00000    0.02109    0.02054 = 
         0.02012   -0.00354    0.00824    0.00388 
AFIX  43 
H1S   2    0.834210    0.329682    0.309980    21.00000   -1.20000 
AFIX   0 
C2S   1    0.729637    0.406864    0.257010    21.00000    0.02491    0.02726 = 
         0.01674    0.00189   -0.00012    0.00133 
AFIX  43 
H2S   2    0.721347    0.346037    0.225102    21.00000   -1.20000 
AFIX   0 
C3S   1    0.674671    0.505676    0.253427    21.00000    0.02328    0.02667 = 
         0.02463    0.00507    0.00094    0.00632 
AFIX  43 
H3S   2    0.628962    0.512992    0.218707    21.00000   -1.20000 
AFIX   0 
C4S   1    0.686255    0.593823    0.300391    21.00000    0.02574    0.02247 = 
         0.02782    0.00390    0.00526    0.00623 
AFIX  43 
H4S   2    0.647766    0.660740    0.298353    21.00000   -1.20000 
AFIX   0 
C5S   1    0.753609    0.584279    0.349996    21.00000    0.02445    0.01825 = 
         0.02661    0.00178    0.00347    0.00025 
AFIX  43 
H5S   2    0.761981    0.645393    0.381725    21.00000   -1.20000 
AFIX   0 
C6S   1    0.809198    0.486378    0.353998    21.00000    0.02103    0.02063 = 
         0.02769   -0.00089    0.00134    0.00961 
AFIX  43 
H6S   2    0.855549    0.480004    0.388325    21.00000   -1.20000 
AFIX   0 
part 2 
same c6s < c1s 
C1T   1    0.801379    0.409021    0.312842   -21.00000    0.02541    0.04227 = 
         0.02198    0.00737   -0.00256    0.00527 
AFIX  43 
H1T   2    0.846797    0.351301    0.321988   -21.00000   -1.20000 
AFIX   0 
C2T   1    0.740372    0.395976    0.258664   -21.00000    0.02531    0.03256 = 
         0.02252    0.00482    0.00433    0.01447 
AFIX  43 
H2T   2    0.742948    0.328413    0.231298   -21.00000   -1.20000 
AFIX   0 
C3T   1    0.675220    0.482454    0.244517   -21.00000    0.02471    0.02627 = 
         0.02163    0.00337    0.00500    0.00612 
AFIX  43 
H3T   2    0.633055    0.473869    0.207608   -21.00000   -1.20000 
AFIX   0 
C4T   1    0.672308    0.580875    0.284539   -21.00000    0.02872    0.02398 = 
         0.02683    0.00676    0.00977    0.00276 
AFIX  43 
H4T   2    0.629060    0.640925    0.274344   -21.00000   -1.20000 
AFIX   0 
C5T   1    0.732206    0.592141    0.339392   -21.00000    0.03436    0.02978 = 
         0.03408   -0.00171    0.00799   -0.00443 
AFIX  43 
H5T   2    0.729242    0.659077    0.367189   -21.00000   -1.20000 
AFIX   0 
C6T   1    0.796138    0.506107    0.353609   -21.00000    0.03060    0.03947 = 
         0.02485    0.00048    0.00270   -0.00742 
AFIX  43 
H6T   2    0.836720    0.513487    0.391507   -21.00000   -1.20000 
AFIX   0 
part 0 
rem ####################################################### 
part 1 
same c6s < c1s 
C1U   1    1.034944    0.352487    0.475352    31.00000    0.02061    0.02441 = 
         0.02753   -0.00683    0.00701    0.00178 
AFIX  43 
H1U   2    1.065674    0.425401    0.481975    31.00000   -1.20000 
AFIX   0 
C2U   1    1.023301    0.277821    0.528154    31.00000    0.02854    0.03204 = 
         0.02327   -0.00300    0.00706    0.00256 
AFIX  43 
H2U   2    1.047613    0.298632    0.570947    31.00000   -1.20000 
AFIX   0 
C3U   1    0.976383    0.173262    0.518528    31.00000    0.02602    0.02272 = 
         0.03596    0.00002    0.00780    0.00035 
AFIX  43 
H3U   2    0.967537    0.123228    0.554906    31.00000   -1.20000 
AFIX   0 
C4U   1    0.942559    0.141480    0.456675    31.00000    0.02374    0.02405 = 
         0.03724   -0.00694   -0.00410    0.00311 
AFIX  43 
H4U   2    0.909231    0.070404    0.450604    31.00000   -1.20000 
AFIX   0 
C5U   1    0.956710    0.212386    0.403041    31.00000    0.02549    0.03048 = 
         0.02879   -0.00463   -0.00292    0.00969 
AFIX  43 
H5U   2    0.936210    0.188171    0.359928    31.00000   -1.20000 
AFIX   0 
C6U   1    1.001246    0.319427    0.412940    31.00000    0.03169    0.02231 = 
         0.02956    0.00051    0.00442    0.01130 
AFIX  43 
H6U   2    1.008610    0.370233    0.376641    31.00000   -1.20000 
AFIX   0 
part 2 
same c6s < c1s 
C1V   1    1.034272    0.355958    0.456832   -31.00000    0.02222    0.02556 = 
         0.03233   -0.00386    0.00555    0.00225 
AFIX  43 
H1V   2    1.064650    0.428802    0.452076   -31.00000   -1.20000 
AFIX   0 
C2V   1    1.032063    0.304648    0.518350   -31.00000    0.02462    0.03098 = 
         0.02918   -0.00999    0.00120    0.00321 
AFIX  43 
H2V   2    1.059865    0.343311    0.555839   -31.00000   -1.20000 
AFIX   0 
C3V   1    0.989752    0.197796    0.525500   -31.00000    0.02496    0.03824 = 
         0.01758   -0.00270    0.00153    0.00509 
AFIX  43 
H3V   2    0.990634    0.161615    0.567590   -31.00000   -1.20000 
AFIX   0 
C4V   1    0.946240    0.143293    0.471940   -31.00000    0.02937    0.02482 = 
         0.02538    0.00545    0.00532    0.00189 
AFIX  43 
H4V   2    0.917194    0.069587    0.476994   -31.00000   -1.20000 
AFIX   0 
C5V   1    0.944920    0.196519    0.410315   -31.00000    0.01822    0.02398 = 
         0.02395   -0.00213    0.00152    0.00045 
AFIX  43 
H5V   2    0.911798    0.161573    0.373784   -31.00000   -1.20000 
AFIX   0 
C6V   1    0.992163    0.301079    0.402147   -31.00000    0.01949    0.02711 = 
         0.02145   -0.00151    0.00354    0.00535 
AFIX  43 
H6V   2    0.995466    0.334346    0.359596   -31.00000   -1.20000 
part 0 
AFIX   0 
HKLF 4 
  
REM  mo_X8_14029_0m in P2(1)/c 
REM R1 =  0.0400 for    6882 Fo > 4sig(Fo)  and  0.0559 for all    8659 data 
REM    534 parameters refined using    748 restraints 
  
END 
  
WGHT      0.0356      2.2810 
  
REM Highest difference peak  0.362,  deepest hole -0.376,  1-sigma level  0.053 
Q1    1   0.7017  0.9842  0.3604  11.00000  0.05    0.36 
Q2    1   0.6863  0.9744  0.4381  11.00000  0.05    0.35 
Q3    1   0.8707  0.9064  0.2357  11.00000  0.05    0.32 
Q4    1   0.7349  0.9828  0.2993  11.00000  0.05    0.31 
Q5    1   0.7831  1.0463  0.2441  11.00000  0.05    0.31 
Q6    1   0.5942  0.9156  0.3913  11.00000  0.05    0.30 
Q7    1   0.8001  0.8586  0.2165  11.00000  0.05    0.30 
Q8    1   0.8562  1.0077  0.2364  11.00000  0.05    0.30 
Q9    1   0.7626  0.9046  0.1661  11.00000  0.05    0.29 
Q10   1   0.7228  0.9188  0.2184  11.00000  0.05    0.28 
Q11   1   0.7397  0.9338  0.4812  11.00000  0.05    0.28 
Q12   1   0.9227  0.9631  0.2758  11.00000  0.05    0.28 
Q13   1   0.5649  0.8163  0.4137  11.00000  0.05    0.28 
Q14   1   0.8139  1.0621  0.1902  11.00000  0.05    0.27 
Q15   1   0.7130  1.0619  0.5455  11.00000  0.05    0.27 
Q16   1   0.5600  0.8182  0.3579  11.00000  0.05    0.27 
Q17   1   0.7799  0.8947  0.3562  11.00000  0.05    0.27 
Q18   1   0.9376  0.9614  0.2452  11.00000  0.05    0.26 
Q19   1   0.9862  0.9066  0.2889  11.00000  0.05    0.26 
Q20   1   0.6090  1.1521  0.3650  11.00000  0.05    0.25 
; 
_shelx_res_checksum   19022 
  
_shelx_hkl_file 
; 
  -1   0   0   50.59    1.50 
  -1   0   0   47.40    1.50 
   1   0   0   54.69    1.80 
  -2   0   0  423.16   11.30 
  -2   0   0  415.26   10.80 
  -2   0   0  417.26   11.30 
  -2   0   0  430.46   10.80 
   2   0   0  415.76   12.40 
   2   0   0  434.66   11.50 
  -3   0   0  166.18    4.80 
  -3   0   0  167.58    4.40 
  -3   0   0  159.48    4.80 
  -3   0   0  166.58    4.40 
   3   0   0  161.58    5.30 
   3   0   0  162.38    4.70 
   3   0   0  163.88    5.80 
  -4   0   0 4543.15  112.29 
  -4   0   0 4324.67  114.89 
  -4   0   0 4600.94  114.99 
  -4   0   0 4581.94  112.29 
   4   0   0 4416.76  122.19 
   4   0   0 4480.75  112.79 
   4   0   0 4546.85  113.39 
  -5   0   0   79.89    3.00 
  -5   0   0   80.89    2.70 
  -5   0   0   84.19    2.70 
  -5   0   0   78.49    3.00 
   5   0   0   76.19    4.00 
   5   0   0   77.09    3.70 
   5   0   0   80.09    2.90 
  -6   0   0  106.99    3.90 
  -6   0   0  106.39    3.90 
  -6   0   0  105.19    3.50 
   6   0   0  103.89    4.70 
   6   0   0  112.29    5.20 
   6   0   0   95.99    3.60 
  -7   0   0  192.38    6.40 
  -7   0   0  199.08    6.00 
  -7   0   0  196.68    6.40 
   7   0   0  194.98    6.20 
   7   0   0  190.08    8.00 
   7   0   0  195.58    7.50 
  -8   0   0   13.60    1.60 
  -8   0   0   13.70    1.40 
  -8   0   0   13.90    1.50 
   8   0   0   14.60    2.30 
   8   0   0   14.70    2.50 
   8   0   0   14.70    1.50 
  -9   0   0   10.40    1.30 
  -9   0   0   12.70    1.70 
  -9   0   0    9.90    1.50 
   9   0   0   12.70    2.30 
   9   0   0    8.00    1.20 
   9   0   0   10.70    2.30 
 -10   0   0    9.30    1.50 
 -10   0   0   10.10    1.40 
  10   0   0    9.70    2.20 
  10   0   0   10.30    1.40 
  10   0   0    8.30    1.90 
 -11   0   0  125.89    5.40 
 -11   0   0  131.09    5.50 
 -11   0   0  121.19    4.90 
  11   0   0  118.49    6.60 
  11   0   0  130.59    4.80 
  11   0   0  126.89    7.40 
  12   0   0   31.30    4.30 
 -13   0   0  318.47   10.50 
 -13   0   0  323.17   11.20 
  13   0   0  342.67   14.50 
  13   0   0  294.27   12.70 
  13   0   0  316.77    9.50 
 -14   0   0   16.30    2.30 
 -14   0   0   20.30    2.60 
  14   0   0   17.30    3.70 
  14   0   0   16.10    3.30 
 -15   0   0    8.20    1.80 
 -15   0   0    7.10    1.80 
  15   0   0    8.60    3.00 
  15   0   0    8.10    2.70 
 -16   0   0   43.20    4.20 
  16   0   0   42.80    6.10 
  16   0   0   45.50    5.90 
 -17   0   0    2.60    1.50 
  17   0   0    1.40    2.00 
  17   0   0   -1.40    2.00 
 -18   0   0    4.40    1.80 
  18   0   0    6.90    3.00 
  18   0   0    3.50    3.10 
 -19   0   0   21.30    3.30 
  19   0   0   12.20    4.10 
  19   0   0   20.60    4.60 
  19  -1   0    1.40    2.90 
  19  -1   0    1.80    2.50 
 -19   1   0    1.60    1.80 
  18  -1   0    3.10    2.60 
  18  -1   0    1.60    2.20 
 -18   1   0    2.00    1.60 
  17  -1   0    2.90    2.40 
  17  -1   0    5.10    2.60 
 -17   1   0    6.10    2.00 
 -17   1   0    9.00    2.30 
  16  -1   0    2.50    2.10 
  16  -1   0    2.10    2.30 
 -16   1   0    1.00    1.50 
 -16   1   0   -0.50    1.30 
  15  -1   0   -0.30    0.90 
  15  -1   0    2.60    2.10 
  15  -1   0   -1.90    1.30 
 -15   1   0   -0.10    1.20 
 -15   1   0    1.60    1.30 
  14  -1   0    2.90    2.00 
  14  -1   0    8.40    1.70 
  14  -1   0    5.10    2.60 
 -14   1   0    6.20    1.80 
 -14   1   0    3.80    1.60 
  13  -1   0    8.00    2.60 
  13  -1   0   11.50    1.90 
  13  -1   0    3.00    1.80 
 -13   1   0    6.60    1.70 
 -13   1   0    6.00    1.70 
  12  -1   0    2.90    1.20 
  12  -1   0    8.10    2.40 
  12  -1   0    3.00    1.90 
 -12   1   0    5.30    1.60 
 -12   1   0    6.30    1.50 
  11  -1   0    2.60    1.90 
  11  -1   0    3.60    1.20 
  11  -1   0    0.00    1.40 
 -11   1   0    4.90    1.40 
 -11   1   0    1.40    1.10 
  10  -1   0   48.50    4.70 
  10  -1   0   53.59    3.10 
  10  -1   0   50.49    4.30 
 -10   1   0   51.69    3.30 
 -10   1   0   48.10    3.00 
 -10   1   0   53.79    3.30 
   9  -1   0  118.99    4.90 
   9  -1   0  113.49    6.00 
   9  -1   0  115.39    6.50 
  -9   1   0  132.69    5.30 
  -9   1   0  117.09    5.10 
  -9   1   0  116.89    5.20 
  -9   1   0  118.39    4.80 
   8  -1   0   14.40    1.90 
   8  -1   0    9.50    2.20 
   8  -1   0   11.30    2.20 
  -8   1   0   16.70    2.00 
  -8   1   0   15.20    2.00 
  -8   1   0   16.30    1.90 
  -8   1   0   18.50    1.90 
   7  -1   0    3.90    0.60 
   7  -1   0    2.30    1.20 
   7  -1   0    4.30    1.10 
   7  -1   0    4.70    1.50 
  -7   1   0    4.70    1.00 
  -7   1   0    2.50    0.90 
  -7   1   0    3.40    1.00 
  -7   1   0    2.70    1.00 
   6  -1   0  188.58    6.40 
   6  -1   0  182.78    5.40 
   6  -1   0  198.48    7.20 
   6  -1   0  176.88    7.50 
  -6   1   0  181.08    6.00 
  -6   1   0  189.18    6.40 
  -6   1   0  186.08    6.40 
   5  -1   0   37.60    2.50 
   5  -1   0   33.70    2.60 
   5  -1   0   36.60    1.70 
   5  -1   0   33.00    2.10 
  -5   1   0   34.90    2.10 
  -5   1   0   35.10    1.90 
  -5   1   0   34.60    2.10 
   4  -1   0    8.90    1.00 
   4  -1   0    4.40    1.20 
   4  -1   0    5.60    1.20 
   4  -1   0    8.00    1.20 
   4  -1   0    6.20    1.00 
  -4   1   0    8.00    1.00 
  -4   1   0    6.90    1.00 
  -4   1   0    8.10    1.10 
   3  -1   0   21.20    1.50 
   3  -1   0   17.10    1.30 
   3  -1   0   21.60    1.60 
   3  -1   0   19.70    1.90 
   3  -1   0   18.90    1.30 
  -3   1   0   16.90    1.30 
  -3   1   0   17.70    1.40 
  -3   1   0   20.30    1.30 
   2  -1   0   20.10    1.30 
   2  -1   0   21.00    1.20 
   2  -1   0   19.80    1.30 
   2  -1   0   17.70    1.20 
  -2   1   0   21.50    1.30 
  -2   1   0   22.60    1.30 
  -2   1   0   21.60    1.20 
   1  -1   0   23.10    1.50 
   1  -1   0   19.90    1.50 
   1  -1   0   19.60    1.50 
  -1   1   0   20.50    1.50 
  -1   1   0   21.10    1.50 
  -1   1   0   23.90    1.50 
   0  -1   0   -1.10    0.20 
   0  -1   0   -0.90    0.20 
   0  -1   0   -0.90    0.20 
   0   1   0   -1.10    0.20 
   0   1   0   -0.60    0.20 
  -1  -1   0   22.30    1.20 
  -1  -1   0   22.60    1.20 
   1   1   0   21.10    1.20 
   3   1   0   19.60    1.80 
   3   1   0   20.00    1.30 
  -4  -1   0    5.70    0.50 
  -4  -1   0    7.30    0.50 
   4   1   0    7.40    1.10 
   4   1   0    9.70    1.50 
  -5  -1   0   35.50    1.40 
  -5  -1   0   34.70    1.40 
   5   1   0   33.20    2.20 
   5   1   0   35.60    2.60 
  -6  -1   0  174.58    5.40 
  -6  -1   0  182.48    5.40 
   6   1   0  181.58    7.40 
   6   1   0  190.68    4.90 
   6   1   0  177.68    6.60 
  -7  -1   0    4.20    0.40 
  -7  -1   0    4.10    0.80 
  -7  -1   0    4.00    0.70 
   7   1   0    4.50    0.50 
   7   1   0    4.10    1.20 
   7   1   0    3.10    1.40 
   7   1   0    4.70    0.50 
  -8  -1   0   14.30    0.90 
  -8  -1   0   14.60    1.40 
  -8  -1   0   15.60    1.00 
  -8  -1   0   12.60    1.30 
   8   1   0   13.70    0.80 
   8   1   0   14.40    2.10 
   8   1   0   16.30    0.80 
   8   1   0   14.30    2.50 
  -9  -1   0  117.29    4.50 
  -9  -1   0  122.19    4.00 
  -9  -1   0  125.89    4.60 
  -9  -1   0  127.99    4.10 
   9   1   0  126.49    6.70 
   9   1   0  117.69    5.80 
 -10  -1   0   55.49    2.80 
 -10  -1   0   56.89    2.50 
 -10  -1   0   49.60    2.80 
  10   1   0   57.89    4.10 
  10   1   0   52.59    4.50 
 -11  -1   0    1.80    0.90 
 -11  -1   0    2.20    0.90 
 -11  -1   0    3.90    1.00 
  11   1   0    1.90    1.50 
  11   1   0    4.50    1.90 
 -12  -1   0    1.70    0.90 
 -12  -1   0    3.70    1.10 
 -12  -1   0    7.40    1.30 
  12   1   0    3.00    1.70 
  12   1   0    3.50    2.10 
 -13  -1   0    8.80    1.60 
 -13  -1   0    8.20    1.60 
  13   1   0    8.90    2.50 
  13   1   0   10.50    2.90 
 -14  -1   0    6.00    1.50 
  14   1   0    9.50    3.00 
  14   1   0    9.90    2.80 
 -15  -1   0    0.70    1.00 
  15   1   0    0.80    1.70 
  15   1   0    1.10    2.40 
 -16  -1   0    2.40    1.30 
  16   1   0   -0.70    1.60 
  16   1   0    1.70    2.10 
 -17  -1   0    5.00    1.60 
  17   1   0    0.90    2.40 
  17   1   0    4.70    2.90 
 -18  -1   0    0.50    1.30 
  18   1   0   -1.60    2.20 
  18   1   0   -0.70    2.10 
 -19  -1   0    2.30    1.60 
  19   1   0    0.90    2.00 
  19   1   0   -1.00    2.70 
  19  -2   0   28.40    5.40 
  19  -2   0   33.50    6.30 
 -19   2   0   26.20    4.30 
 -19   2   0   32.30    4.50 
  18  -2   0   18.30    4.80 
  18  -2   0   14.10    4.00 
 -18   2   0   14.90    3.10 
 -18   2   0   13.30    2.90 
  17  -2   0    4.10    2.70 
  17  -2   0    4.80    3.00 
 -17   2   0    4.30    2.00 
 -17   2   0    5.70    2.20 
  16  -2   0   64.19    7.20 
  16  -2   0   72.89    8.50 
  16  -2   0   74.69    4.50 
 -16   2   0   76.99    5.40 
 -16   2   0   68.79    5.10 
  15  -2   0   42.20    5.50 
  15  -2   0   41.40    5.90 
  15  -2   0   36.30    3.70 
 -15   2   0   39.80    4.20 
 -15   2   0   41.30    4.50 
  14  -2   0   45.50    3.50 
  14  -2   0   48.50    6.40 
  14  -2   0   44.80    5.50 
 -14   2   0   45.60    4.40 
 -14   2   0   46.50    4.60 
  13  -2   0  128.69    8.30 
  13  -2   0  135.49    6.30 
  13  -2   0  149.88    8.40 
 -13   2   0  140.29    7.00 
 -13   2   0  145.99    6.70 
  12  -2   0   12.50    3.00 
  12  -2   0    7.30    1.80 
  12  -2   0   11.00    2.90 
 -12   2   0    7.40    1.90 
 -12   2   0   13.80    2.30 
  11  -2   0   29.90    3.10 
  11  -2   0   30.10    4.00 
  11  -2   0   21.40    3.60 
 -11   2   0   26.70    3.10 
 -11   2   0   33.60    3.30 
  10  -2   0   42.30    4.70 
  10  -2   0   48.10    4.80 
  10  -2   0   41.40    3.10 
 -10   2   0   50.39    3.50 
 -10   2   0   46.20    3.40 
 -10   2   0   46.00    3.10 
   9  -2   0   36.40    2.80 
   9  -2   0   39.60    4.30 
   9  -2   0   38.20    4.00 
   9  -2   0   40.80    2.00 
  -9   2   0   36.70    2.90 
  -9   2   0   41.00    3.00 
  -9   2   0   42.70    3.10 
  -9   2   0   38.50    2.70 
   8  -2   0   17.10    1.60 
   8  -2   0   17.00    2.20 
   8  -2   0   23.80    3.20 
   8  -2   0   16.60    2.50 
  -8   2   0   16.80    2.20 
  -8   2   0   16.90    2.30 
  -8   2   0   18.30    2.10 
  -8   2   0   16.80    2.20 
   7  -2   0   12.20    1.40 
   7  -2   0   15.80    2.50 
   7  -2   0   13.80    1.90 
   7  -2   0   13.50    2.10 
  -7   2   0   14.10    1.80 
  -7   2   0   10.80    1.70 
  -7   2   0   16.60    2.20 
  -7   2   0   15.60    2.00 
   6  -2   0    1.10    0.90 
   6  -2   0    2.60    1.30 
   6  -2   0    3.10    1.20 
   6  -2   0    3.60    0.90 
   6  -2   0    3.30    1.20 
  -6   2   0    2.10    1.00 
  -6   2   0    4.00    1.10 
  -6   2   0    1.50    0.90 
  -6   2   0    1.20    0.90 
   5  -2   0  305.97    9.90 
   5  -2   0  322.97    9.90 
   5  -2   0  301.27   10.80 
   5  -2   0  297.77   10.10 
   5  -2   0  312.07    9.30 
  -5   2   0  306.07    9.80 
  -5   2   0  325.47   10.00 
  -5   2   0  319.07    9.90 
  -5   2   0  316.57    9.50 
   4  -2   0   21.20    2.20 
   4  -2   0   26.10    1.80 
   4  -2   0   22.20    1.80 
   4  -2   0   26.20    2.10 
  -4   2   0   25.40    2.20 
  -4   2   0   22.30    1.80 
  -4   2   0   21.40    2.10 
  -4   2   0   24.60    1.70 
   3  -2   0  452.15   12.70 
   3  -2   0  445.16   13.00 
   3  -2   0  443.86   13.00 
   3  -2   0  463.45   13.10 
  -3   2   0  462.25   13.00 
   2  -2   0 9695.73  244.08 
   2  -2   0 9569.34  245.08 
   2  -2   0 9249.38  246.98 
   2  -2   0 9908.81  244.58 
   2  -2   0 9999.00  247.18 
  -2   2   0 9829.22  243.38 
  -2   2   0 9510.25  251.27 
  -2   2   0 9510.65  244.78 
   1  -2   0    0.20    0.60 
   1  -2   0   -0.50    0.50 
   1  -2   0    0.20    0.60 
   1  -2   0    0.00    0.50 
   1  -2   0   -0.30    0.50 
  -1   2   0    0.50    0.60 
  -1   2   0    0.30    0.60 
  -1   2   0    0.40    0.60 
   0  -2   0  631.64   17.30 
   0  -2   0  648.64   16.80 
   0   2   0  643.84   16.80 
   0   2   0  645.44   17.30 
   0   2   0  645.04   17.10 
  -1  -2   0   -0.10    0.40 
  -1  -2   0   -0.10    0.40 
  -1  -2   0   -0.40    0.40 
   1   2   0   -0.30    0.40 
   1   2   0    0.00    0.30 
   1   2   0    0.10    0.40 
  -2  -2   0 9792.02  251.37 
  -2  -2   0 9742.83  251.17 
   2   2   0 9869.41  246.68 
  -3  -2   0  438.96   11.70 
  -3  -2   0  452.45   11.70 
   3   2   0  443.36   13.70 
   3   2   0  453.95   11.90 
   4   2   0   24.10    1.50 
   4   2   0   26.70    2.50 
  -6  -2   0    2.40    0.40 
   6   2   0    4.00    1.40 
   6   2   0    1.90    0.90 
  -7  -2   0   15.00    0.90 
  -7  -2   0   14.10    0.90 
   7   2   0   12.90    2.30 
   7   2   0   15.20    2.00 
  -8  -2   0   15.10    1.00 
  -8  -2   0   15.70    1.00 
   8   2   0   14.80    2.20 
   8   2   0   14.90    2.60 
  -9  -2   0   38.10    1.90 
  -9  -2   0   41.90    2.00 
   9   2   0   43.60    3.20 
   9   2   0   41.00    4.50 
 -10  -2   0   46.90    2.30 
 -10  -2   0   48.10    1.70 
 -10  -2   0   48.00    2.30 
  10   2   0   45.20    3.50 
  10   2   0   48.50    5.10 
 -11  -2   0   27.90    1.90 
 -11  -2   0   27.50    1.90 
 -11  -2   0   28.00    1.50 
  11   2   0   24.70    3.80 
  11   2   0   27.40    3.40 
 -12  -2   0   11.50    1.50 
 -12  -2   0   10.70    1.50 
  12   2   0   12.30    2.60 
  12   2   0    6.60    2.40 
 -13  -2   0  143.89    5.50 
 -13  -2   0  138.19    5.40 
  13   2   0  122.19    8.10 
  13   2   0  140.79    7.40 
 -14  -2   0   40.40    2.80 
  14   2   0   39.70    4.80 
  14   2   0   45.20    6.00 
 -15  -2   0   39.10    2.80 
  15   2   0   37.90    4.80 
  15   2   0   47.00    6.20 
 -16  -2   0   73.29    4.10 
  16   2   0   57.59    7.30 
  16   2   0   79.69    6.20 
 -17  -2   0    5.10    1.50 
  17   2   0    0.50    2.20 
  17   2   0    8.30    3.00 
 -18  -2   0   11.00    2.10 
  18   2   0    1.80    2.70 
  18   2   0   10.30    3.20 
 -19  -2   0   26.80    3.10 
  19   2   0   16.60    4.70 
  19   2   0   28.20    5.10 
  19   2   0   16.50    4.70 
  19  -3   0   -0.90    2.30 
  19  -3   0    2.30    2.70 
 -19   3   0    3.50    2.30 
 -19   3   0   -1.50    1.80 
  18  -3   0    1.50    2.80 
  18  -3   0    0.90    2.20 
 -18   3   0    2.80    2.20 
 -18   3   0    0.10    1.60 
  17  -3   0   -1.00    1.60 
  17  -3   0    0.10    2.00 
  17  -3   0   -0.90    1.40 
 -17   3   0   -0.10    1.50 
 -17   3   0    0.10    1.70 
  16  -3   0   13.50    2.60 
  16  -3   0   24.50    5.00 
  16  -3   0   10.10    3.30 
 -16   3   0   18.70    3.30 
 -16   3   0   14.10    3.10 
  15  -3   0    6.80    2.10 
  15  -3   0    9.80    3.20 
  15  -3   0   10.60    3.10 
 -15   3   0    5.70    2.10 
 -15   3   0    7.30    2.30 
  14  -3   0    1.60    1.60 
  14  -3   0    3.10    2.40 
  14  -3   0   -0.90    1.10 
 -14   3   0   -0.10    1.20 
 -14   3   0    2.40    1.50 
  13  -3   0    1.70    1.30 
  13  -3   0    3.60    2.00 
  13  -3   0    2.70    2.10 
 -13   3   0    3.40    1.60 
 -13   3   0    2.20    1.60 
  12  -3   0    7.90    2.10 
  12  -3   0    7.60    2.50 
  12  -3   0    9.10    2.60 
 -12   3   0    6.80    1.90 
 -12   3   0   10.90    2.30 
  11  -3   0   44.40    5.20 
  11  -3   0   44.30    4.90 
  11  -3   0   55.79    3.90 
 -11   3   0   50.79    4.50 
 -11   3   0   49.90    3.90 
  10  -3   0   -1.00    0.70 
  10  -3   0   -0.50    1.10 
  10  -3   0   -0.40    1.10 
  10  -3   0    1.40    1.20 
 -10   3   0    0.90    1.00 
 -10   3   0    0.90    1.20 
 -10   3   0   -0.20    0.90 
   9  -3   0  174.88    7.90 
   9  -3   0  150.68    5.80 
   9  -3   0  157.78    7.90 
   9  -3   0  153.18    6.80 
  -9   3   0  163.38    7.10 
  -9   3   0  152.48    6.50 
  -9   3   0  159.58    6.90 
   8  -3   0   57.39    4.20 
   8  -3   0   61.09    3.90 
   8  -3   0   63.39    3.80 
   8  -3   0   64.29    4.50 
   8  -3   0   62.09    3.30 
  -8   3   0   66.29    3.90 
  -8   3   0   60.79    3.60 
  -8   3   0   62.09    3.90 
  -8   3   0   70.39    4.10 
   7  -3   0   30.20    3.30 
   7  -3   0   29.50    2.90 
   7  -3   0   31.50    3.50 
   7  -3   0   28.90    2.20 
   7  -3   0   24.30    2.80 
  -7   3   0   33.30    3.30 
  -7   3   0   27.60    2.70 
  -7   3   0   28.30    3.00 
   6  -3   0    4.10    1.30 
   6  -3   0    3.10    1.30 
   6  -3   0    2.30    1.00 
   6  -3   0    3.60    1.50 
   6  -3   0    1.00    0.90 
  -6   3   0    2.20    1.00 
  -6   3   0    4.40    1.30 
  -6   3   0    3.50    1.20 
   5  -3   0   14.90    2.10 
   5  -3   0   15.90    2.00 
   5  -3   0   14.80    2.00 
   5  -3   0   10.20    1.60 
  -5   3   0   14.20    2.00 
  -5   3   0   15.40    2.00 
  -5   3   0   16.40    2.00 
   4  -3   0  111.29    4.70 
   4  -3   0  105.19    4.70 
   4  -3   0  100.79    4.30 
  -4   3   0  106.99    4.50 
  -4   3   0  103.99    4.60 
  -4   3   0  110.69    4.70 
   3  -3   0   75.29    3.40 
   3  -3   0   75.69    3.60 
   3  -3   0   77.29    3.50 
   3  -3   0   73.29    3.60 
   3  -3   0   74.19    3.60 
  -3   3   0   71.39    3.60 
  -3   3   0   69.29    3.30 
  -3   3   0   72.09    3.60 
   2  -3   0  151.58    5.50 
   2  -3   0  155.38    5.70 
   2  -3   0  158.18    5.40 
  -2   3   0  159.88    5.70 
  -2   3   0  153.98    5.40 
  -2   3   0  164.08    5.80 
   1  -3   0   61.19    3.10 
   1  -3   0   62.89    3.10 
   1  -3   0   66.29    2.70 
   1  -3   0   59.19    2.90 
   1  -3   0   61.09    3.10 
  -1   3   0   67.59    3.10 
  -1   3   0   66.39    3.10 
  -1   3   0   66.19    2.90 
   0  -3   0   -0.40    0.60 
   0  -3   0   -0.10    0.60 
   0  -3   0   -0.90    0.40 
   0  -3   0    1.20    0.90 
   0  -3   0   -0.10    0.70 
   0   3   0   -0.10    0.60 
   0   3   0   -0.30    0.60 
   0   3   0   -0.60    0.60 
  -1  -3   0   60.19    2.50 
  -1  -3   0   61.79    2.70 
  -1  -3   0   58.39    2.60 
   1   3   0   58.59    2.30 
   1   3   0   60.89    2.60 
   1   3   0   61.69    2.70 
  -2  -3   0  160.38    5.00 
  -2  -3   0  155.58    4.70 
  -2  -3   0  149.09    4.90 
   2   3   0  156.08    4.90 
  -3  -3   0   72.29    2.70 
  -3  -3   0   75.89    2.30 
  -3  -3   0   75.29    2.70 
  -3  -3   0   75.39    2.30 
   3   3   0   75.79    2.60 
  -4  -3   0  106.69    3.40 
  -4  -3   0  111.49    3.40 
   4   3   0  110.59    5.10 
   4   3   0  104.09    3.50 
   4   3   0  109.59    3.00 
  -5  -3   0   14.70    0.80 
  -5  -3   0   14.70    0.80 
   5   3   0   17.60    1.50 
   5   3   0   10.60    1.90 
  -6  -3   0    3.50    0.40 
  -6  -3   0    3.90    0.40 
   6   3   0    3.40    1.00 
   6   3   0    5.20    1.70 
  -7  -3   0   29.30    1.10 
  -7  -3   0   29.60    1.10 
   7   3   0   36.20    3.80 
   7   3   0   28.90    2.20 
  -8  -3   0   62.89    2.10 
   8   3   0   64.19    4.50 
   8   3   0   62.19    3.50 
  -9  -3   0  165.58    4.90 
  -9  -3   0  164.68    4.90 
   9   3   0  165.48    6.80 
   9   3   0  168.78    8.30 
 -10  -3   0   -0.20    0.40 
 -10  -3   0    0.20    0.40 
  10   3   0    0.90    1.40 
  10   3   0    0.70    1.40 
  10   3   0    0.20    1.00 
 -11  -3   0   47.30    2.20 
 -11  -3   0   46.90    2.20 
  11   3   0   53.19    3.90 
 -12  -3   0    6.30    1.00 
 -12  -3   0    8.40    1.10 
  12   3   0    5.70    2.00 
  12   3   0    2.10    2.00 
 -13  -3   0    2.70    0.80 
 -13  -3   0    3.20    0.90 
  13   3   0    1.30    2.00 
  13   3   0    3.40    1.80 
 -14  -3   0    0.40    0.70 
  14   3   0    2.00    2.20 
  14   3   0   -0.50    1.20 
  14   3   0    1.70    2.20 
 -15  -3   0    8.60    1.50 
  15   3   0    8.40    3.20 
  15   3   0    6.50    2.40 
 -16  -3   0   14.40    1.90 
  16   3   0   16.90    4.40 
  16   3   0   13.00    3.10 
 -17  -3   0    0.80    0.90 
  17   3   0   -2.50    1.90 
  17   3   0    1.60    2.10 
 -18  -3   0    0.50    1.00 
  18   3   0   -0.10    2.80 
 -19  -3   0    2.70    1.30 
  19   3   0    6.90    3.70 
  19  -4   0   23.00    5.80 
  19  -4   0   21.00    4.90 
 -19   4   0   10.90    3.30 
 -19   4   0   21.00    4.30 
  18  -4   0   22.60    5.20 
  18  -4   0   17.30    3.20 
  18  -4   0   11.50    4.10 
 -18   4   0   20.50    3.90 
 -18   4   0   27.50    4.60 
  17  -4   0    9.40    2.50 
  17  -4   0   11.40    4.00 
  17  -4   0    9.20    3.50 
 -17   4   0    5.50    2.50 
 -17   4   0    8.70    2.80 
  16  -4   0   94.39    9.10 
  16  -4   0   93.89    9.60 
  16  -4   0   82.79    5.70 
 -16   4   0   90.19    6.60 
 -16   4   0   92.29    6.30 
  15  -4   0    5.30    2.60 
  15  -4   0    1.60    2.30 
  15  -4   0    2.50    1.60 
 -15   4   0    3.60    1.90 
 -15   4   0    6.60    2.30 
  14  -4   0    5.70    2.50 
  14  -4   0    5.60    2.20 
  14  -4   0    6.10    2.90 
 -14   4   0   10.40    2.60 
 -14   4   0    4.40    2.00 
  13  -4   0   26.40    4.40 
  13  -4   0   29.20    3.90 
  13  -4   0   27.50    4.50 
 -13   4   0   20.60    3.40 
 -13   4   0   28.60    3.80 
  12  -4   0  106.89    6.20 
  12  -4   0  124.09    7.60 
  12  -4   0  110.39    7.60 
 -12   4   0  111.49    6.10 
 -12   4   0  105.29    6.40 
  11  -4   0  116.39    7.30 
  11  -4   0   93.19    6.40 
  11  -4   0  102.39    6.00 
 -11   4   0  103.99    6.10 
 -11   4   0  111.79    6.30 
 -11   4   0  109.69    5.90 
  10  -4   0    0.70    1.30 
  10  -4   0   -0.60    1.20 
  10  -4   0    0.40    0.90 
  10  -4   0    0.00    1.20 
 -10   4   0    0.10    1.30 
 -10   4   0    2.30    1.30 
 -10   4   0    1.10    1.20 
   9  -4   0   10.10    2.50 
   9  -4   0   12.30    2.00 
   9  -4   0   14.20    2.70 
   9  -4   0   11.40    2.30 
  -9   4   0   10.90    2.20 
  -9   4   0   14.00    2.50 
  -9   4   0   14.80    2.60 
   8  -4   0    0.30    1.20 
   8  -4   0    1.60    1.20 
   8  -4   0   -0.60    0.90 
   8  -4   0   -0.10    0.80 
   8  -4   0    1.60    1.30 
  -8   4   0   -0.50    1.00 
  -8   4   0    1.30    1.30 
  -8   4   0    0.30    0.90 
   7  -4   0   25.10    3.20 
   7  -4   0   31.90    3.20 
   7  -4   0   26.30    3.40 
   7  -4   0   28.20    3.20 
   7  -4   0   27.00    2.80 
  -7   4   0   27.20    3.20 
  -7   4   0   31.60    3.20 
  -7   4   0   34.50    3.60 
   6  -4   0   66.79    4.20 
   6  -4   0   71.29    4.30 
   6  -4   0   63.49    3.90 
   6  -4   0   64.59    3.60 
  -6   4   0   59.09    3.70 
  -6   4   0   72.09    4.20 
  -6   4   0   67.09    4.10 
   5  -4   0  507.35   15.00 
   5  -4   0  480.65   15.30 
   5  -4   0  499.15   15.60 
   5  -4   0  519.65   15.70 
  -5   4   0  486.45   15.40 
  -5   4   0  494.35   15.00 
  -5   4   0  488.05   15.60 
   4  -4   0   27.50    2.60 
   4  -4   0   23.60    2.40 
   4  -4   0   26.70    2.80 
   4  -4   0   25.50    2.80 
  -4   4   0   27.50    2.60 
  -4   4   0   24.20    2.60 
  -4   4   0   24.40    2.60 
   3  -4   0  443.66   13.60 
   3  -4   0  426.36   13.50 
   3  -4   0  438.36   13.00 
   3  -4   0  446.96   13.60 
   3  -4   0  439.46   13.20 
  -3   4   0  432.26   13.00 
  -3   4   0  427.26   13.60 
  -3   4   0  425.16   13.40 
   2  -4   0   17.90    2.10 
   2  -4   0   22.80    1.80 
   2  -4   0   16.10    1.90 
   2  -4   0   19.90    2.30 
   2  -4   0   22.90    2.50 
  -2   4   0   15.50    2.10 
  -2   4   0   21.50    2.40 
  -2   4   0   19.90    2.10 
   1  -4   0   45.80    2.70 
   1  -4   0   49.50    3.00 
   1  -4   0   49.70    2.40 
   1  -4   0   51.19    2.90 
   1  -4   0   46.40    2.90 
  -1   4   0   50.49    3.00 
  -1   4   0   47.50    2.70 
  -1   4   0   53.19    3.00 
   0  -4   0   24.70    1.90 
   0  -4   0   24.40    1.40 
   0  -4   0   25.60    2.40 
   0  -4   0   26.10    2.00 
   0  -4   0   27.70    2.20 
   0   4   0   28.30    2.00 
   0   4   0   26.40    2.40 
   0   4   0   24.40    1.80 
  -1  -4   0   51.49    2.60 
  -1  -4   0   49.20    2.70 
  -1  -4   0   52.99    2.80 
  -1  -4   0   48.60    2.70 
   1   4   0   52.59    2.70 
   1   4   0   48.00    2.30 
   1   4   0   48.70    2.60 
  -2  -4   0   17.90    1.60 
  -2  -4   0   20.40    1.60 
  -2  -4   0   18.80    1.70 
   2   4   0   15.90    1.00 
   2   4   0   19.50    1.50 
  -3  -4   0  450.65   12.20 
  -3  -4   0  434.46   12.70 
  -3  -4   0  461.75   12.80 
   3   4   0  448.66   12.50 
  -4  -4   0   25.90    1.30 
  -4  -4   0   25.50    1.60 
  -4  -4   0   30.10    1.40 
  -4  -4   0   25.20    1.60 
   4   4   0   25.80    1.40 
  -5  -4   0  498.65   13.80 
  -5  -4   0  489.75   13.70 
   5   4   0  517.05   13.60 
  -6  -4   0   63.09    2.50 
  -6  -4   0   67.99    2.50 
   6   4   0   68.99    2.90 
   6   4   0   67.09    4.30 
  -7  -4   0   28.50    1.30 
  -7  -4   0   28.10    1.30 
   7   4   0   29.40    2.00 
   7   4   0   22.80    3.20 
  -8  -4   0    1.70    0.40 
  -8  -4   0    0.90    0.40 
   8   4   0    1.30    0.90 
   8   4   0    0.80    1.40 
  -9  -4   0   11.40    0.80 
  -9  -4   0   11.70    0.80 
   9   4   0   11.30    2.50 
   9   4   0   10.80    1.80 
 -10  -4   0    1.40    0.40 
 -10  -4   0    0.90    0.40 
  10   4   0   -0.10    1.40 
  10   4   0   -0.70    0.90 
 -11  -4   0  103.39    3.30 
 -11  -4   0  102.79    3.40 
  11   4   0  108.19    5.50 
  11   4   0  107.29    7.00 
 -12  -4   0  112.69    3.60 
 -12  -4   0  104.79    3.50 
  12   4   0  104.39    5.70 
  12   4   0  116.39    7.60 
 -13  -4   0   27.00    1.50 
 -13  -4   0   25.80    1.50 
  13   4   0   28.90    4.80 
  13   4   0   28.20    3.60 
 -14  -4   0    6.50    1.00 
 -14  -4   0    4.90    0.90 
  14   4   0    4.30    1.80 
  14   4   0    4.30    2.60 
 -15  -4   0    3.10    0.80 
  15   4   0    2.50    2.40 
 -16  -4   0   86.29    3.30 
  16   4   0   79.89    8.80 
 -17  -4   0    7.90    1.10 
  17   4   0    3.30    2.90 
 -18  -4   0   18.20    1.60 
  18   4   0   14.60    4.30 
  19   4   0   30.80    6.10 
  18  -5   0   46.40    5.40 
  18  -5   0   38.70    6.80 
  18  -5   0   43.90    6.70 
 -18   5   0   44.20    5.90 
 -18   5   0   37.80    5.40 
  17  -5   0   10.60    2.90 
  17  -5   0    4.70    2.90 
  17  -5   0    3.20    2.80 
 -17   5   0    9.00    2.90 
 -17   5   0    9.40    3.10 
  16  -5   0   -1.50    1.50 
  16  -5   0   -0.60    1.90 
  16  -5   0   -0.90    1.70 
 -16   5   0   -0.10    1.60 
 -16   5   0   -1.30    1.70 
  15  -5   0   10.50    2.90 
  15  -5   0    6.40    3.00 
  15  -5   0   16.10    3.90 
 -15   5   0   13.50    3.20 
 -15   5   0   11.80    3.10 
  14  -5   0    1.60    1.90 
  14  -5   0    3.10    2.30 
  14  -5   0    0.30    1.90 
 -14   5   0    2.50    1.80 
 -14   5   0    0.80    1.60 
  13  -5   0    1.50    1.60 
  13  -5   0    2.40    2.10 
  13  -5   0    2.30    2.00 
 -13   5   0    0.90    1.60 
 -13   5   0    2.20    1.70 
  12  -5   0   84.79    6.50 
  12  -5   0   94.39    6.90 
  12  -5   0   86.59    5.90 
 -12   5   0   80.09    5.50 
 -12   5   0   93.09    6.20 
  11  -5   0   -0.30    1.40 
  11  -5   0   -2.30    1.30 
  11  -5   0   -0.50    1.20 
 -11   5   0    1.20    1.40 
 -11   5   0    2.60    1.60 
 -11   5   0   -0.30    1.40 
  10  -5   0   88.99    5.70 
  10  -5   0   82.39    5.80 
  10  -5   0   83.49    4.80 
  10  -5   0   93.49    6.50 
 -10   5   0   84.59    5.60 
 -10   5   0   96.79    5.90 
 -10   5   0   91.69    5.50 
   9  -5   0   50.09    4.90 
   9  -5   0   43.80    5.00 
   9  -5   0   36.90    4.40 
   9  -5   0   42.10    3.90 
  -9   5   0   40.80    4.10 
  -9   5   0   30.10    3.80 
  -9   5   0   44.80    4.50 
   8  -5   0   21.80    3.20 
   8  -5   0   17.80    3.00 
   8  -5   0   16.90    2.50 
   8  -5   0   17.50    3.10 
   8  -5   0   16.10    2.80 
  -8   5   0   15.10    2.50 
  -8   5   0   24.10    3.30 
  -8   5   0   21.20    3.10 
   7  -5   0   10.40    2.20 
   7  -5   0    7.80    1.80 
   7  -5   0    9.20    2.20 
   7  -5   0    9.90    2.00 
  -7   5   0    9.90    2.10 
  -7   5   0   10.70    2.10 
  -7   5   0   10.70    2.20 
   6  -5   0   39.60    3.10 
   6  -5   0   46.70    3.70 
   6  -5   0   40.40    4.00 
   6  -5   0   52.99    3.70 
  -6   5   0   49.30    3.50 
  -6   5   0   51.69    3.80 
  -6   5   0   40.90    4.10 
   5  -5   0   32.10    3.30 
   5  -5   0   28.80    3.10 
  -5   5   0   27.00    3.10 
  -5   5   0   31.00    3.10 
   4  -5   0  273.27    9.90 
   4  -5   0  259.17    9.40 
   4  -5   0  262.17    9.90 
   4  -5   0  268.27    9.30 
  -4   5   0  270.77    9.40 
  -4   5   0  257.47    9.80 
  -4   5   0  270.57    9.80 
   3  -5   0   36.70    2.80 
   3  -5   0   32.70    3.30 
   3  -5   0   36.00    2.80 
   3  -5   0   35.10    2.50 
   3  -5   0   30.20    3.10 
  -3   5   0   34.60    2.60 
  -3   5   0   30.00    3.10 
  -3   5   0   36.10    3.50 
   2  -5   0    5.10    1.50 
   2  -5   0    3.20    1.20 
   2  -5   0    3.30    1.30 
   2  -5   0    3.30    1.10 
   2  -5   0    4.30    1.40 
  -2   5   0    2.60    1.20 
  -2   5   0    2.50    1.20 
  -2   5   0    2.80    1.10 
   1  -5   0   58.89    3.50 
   1  -5   0   53.69    2.60 
   1  -5   0   47.80    3.10 
   1  -5   0   49.00    3.30 
   1  -5   0   50.99    3.20 
  -1   5   0   50.39    3.20 
  -1   5   0   56.89    3.10 
  -1   5   0   56.49    3.40 
   0  -5   0    1.00    1.00 
   0  -5   0    2.20    0.90 
   0  -5   0    0.80    1.00 
   0  -5   0    0.60    0.60 
   0  -5   0    1.70    0.90 
   0   5   0    2.00    1.00 
   0   5   0    0.10    0.80 
   0   5   0    1.70    0.80 
  -1  -5   0   54.39    3.20 
  -1  -5   0   53.59    3.00 
  -1  -5   0   51.29    1.90 
  -1  -5   0   45.50    2.90 
  -1  -5   0   52.29    2.90 
   1   5   0   51.29    2.60 
   1   5   0   56.89    3.10 
   1   5   0   57.09    3.10 
  -2  -5   0    3.00    1.00 
  -2  -5   0    4.50    1.10 
  -2  -5   0    2.10    1.00 
  -2  -5   0    2.50    1.00 
   2   5   0    3.40    1.00 
   2   5   0    2.80    0.80 
  -3  -5   0   36.70    2.30 
  -3  -5   0   34.80    2.10 
  -3  -5   0   30.90    2.20 
   3   5   0   34.80    2.20 
  -4  -5   0  270.17    8.60 
  -4  -5   0  267.27    8.50 
  -4  -5   0  268.47    8.10 
   4   5   0  276.07    8.20 
  -5  -5   0   29.70    1.90 
   5   5   0   31.60    1.60 
  -6  -5   0   49.00    2.40 
  -6  -5   0   50.79    2.00 
  -6  -5   0   47.60    1.90 
  -6  -5   0   47.60    2.30 
  -7  -5   0   10.70    1.10 
  -7  -5   0   10.90    1.20 
   7   5   0   11.50    1.40 
  -8  -5   0   19.80    1.30 
  -8  -5   0   21.40    1.40 
   8   5   0   20.20    2.10 
  -9  -5   0   35.60    1.70 
  -9  -5   0   36.70    1.70 
   9   5   0   33.40    4.40 
   9   5   0   40.50    2.60 
 -10  -5   0   90.59    3.00 
 -10  -5   0   92.99    3.10 
  10   5   0   90.39    6.40 
  10   5   0   87.89    4.50 
 -11  -5   0   -0.10    0.30 
  11   5   0    1.40    1.10 
  11   5   0    0.50    1.60 
  12   5   0   89.79    6.80 
  13   5   0    0.30    1.90 
  14   5   0    0.20    2.10 
  15   5   0   10.60    3.70 
  16   5   0   -1.70    1.90 
  17   5   0   11.30    3.90 
  18   5   0   45.50    7.40 
  18  -6   0    5.00    3.40 
  18  -6   0    3.20    2.50 
  18  -6   0    5.50    3.40 
 -18   6   0    3.20    2.80 
 -18   6   0    2.00    2.40 
  17  -6   0    3.30    2.90 
  17  -6   0    4.70    2.70 
  17  -6   0    1.90    2.10 
 -17   6   0    3.10    2.50 
 -17   6   0    3.30    2.50 
  16  -6   0   16.70    4.30 
  16  -6   0   23.30    4.20 
  16  -6   0   16.50    4.40 
 -16   6   0   27.20    4.60 
 -16   6   0   18.00    3.90 
  15  -6   0   -0.40    1.80 
  15  -6   0    1.10    1.90 
  15  -6   0    0.20    2.00 
 -15   6   0    2.00    2.00 
 -15   6   0    3.20    2.30 
  14  -6   0  106.09    8.10 
  14  -6   0  108.29    7.10 
  14  -6   0   83.69    8.50 
 -14   6   0   92.69    7.10 
 -14   6   0   91.79    6.50 
  13  -6   0    1.30    1.80 
  13  -6   0    1.90    2.00 
  13  -6   0    2.40    2.10 
 -13   6   0   -0.40    1.50 
 -13   6   0    1.20    1.70 
  12  -6   0    7.20    2.50 
  12  -6   0    3.70    2.20 
  12  -6   0    7.20    2.70 
 -12   6   0    7.70    2.40 
 -12   6   0    6.90    2.50 
  11  -6   0   10.50    3.00 
  11  -6   0   20.70    3.40 
  11  -6   0   20.20    4.10 
  11  -6   0   14.70    3.10 
 -11   6   0   12.50    3.00 
 -11   6   0   10.80    2.60 
 -11   6   0   13.90    2.90 
  10  -6   0    7.90    2.60 
  10  -6   0    6.20    1.90 
  10  -6   0    7.40    2.60 
  10  -6   0    4.30    2.00 
 -10   6   0    4.90    1.90 
 -10   6   0    6.30    2.30 
 -10   6   0    4.30    1.90 
   9  -6   0    7.10    2.40 
   9  -6   0    4.60    1.90 
   9  -6   0    1.60    1.40 
   9  -6   0    2.80    1.40 
  -9   6   0    5.60    2.10 
  -9   6   0    1.60    1.40 
  -9   6   0    6.70    2.00 
   8  -6   0   24.40    3.40 
   8  -6   0   29.40    3.90 
   8  -6   0   21.40    3.00 
  -8   6   0   20.40    3.20 
  -8   6   0   31.40    4.00 
  -8   6   0   32.40    3.70 
   7  -6   0   79.99    5.30 
   7  -6   0   83.19    5.20 
   7  -6   0   86.09    4.90 
   7  -6   0   77.89    5.10 
  -7   6   0   85.39    5.40 
  -7   6   0   73.19    5.10 
  -7   6   0   76.69    4.80 
   5  -6   0   -0.40    0.90 
   5  -6   0    2.10    1.30 
   5  -6   0   -0.50    1.00 
   5  -6   0    1.30    1.10 
  -5   6   0   -0.60    1.00 
  -5   6   0    0.60    1.10 
  -5   6   0    0.30    0.90 
   4  -6   0   10.90    1.90 
   4  -6   0    7.00    2.00 
   4  -6   0    7.90    1.90 
   4  -6   0    6.50    1.80 
  -4   6   0    8.30    2.00 
  -4   6   0    7.80    1.90 
  -4   6   0   12.00    2.00 
   3  -6   0   88.29    4.30 
   3  -6   0   84.19    4.60 
   3  -6   0   92.99    5.20 
   3  -6   0   86.79    4.90 
  -3   6   0   75.19    4.60 
  -3   6   0   80.09    4.80 
  -3   6   0   84.59    4.50 
   2  -6   0   67.29    4.10 
   2  -6   0   69.79    4.30 
   2  -6   0   55.49    3.20 
   2  -6   0   52.79    3.60 
   2  -6   0   54.79    3.80 
  -2   6   0   57.49    3.50 
  -2   6   0   53.19    3.80 
  -2   6   0   65.99    4.00 
   1  -6   0    8.80    1.80 
   1  -6   0    4.20    1.30 
   1  -6   0    7.30    1.70 
   1  -6   0    7.10    1.70 
   1  -6   0    7.40    1.30 
  -1   6   0    5.00    1.40 
  -1   6   0    6.70    1.60 
  -1   6   0    7.00    1.50 
   0  -6   0  264.27    9.30 
   0  -6   0  261.47    8.00 
   0  -6   0  279.67    9.90 
   0  -6   0  270.17    9.70 
   0  -6   0  265.37    9.60 
   0   6   0  266.17    8.90 
   0   6   0  278.37    9.60 
   0   6   0  274.57    9.50 
  -1  -6   0    5.20    0.70 
  -1  -6   0    5.30    1.50 
  -1  -6   0    6.20    1.40 
  -1  -6   0    7.20    1.60 
  -1  -6   0    9.00    1.60 
  -1  -6   0    5.80    1.40 
   1   6   0    5.80    1.20 
   1   6   0    2.70    1.00 
   1   6   0    3.90    1.20 
  -2  -6   0   54.89    3.40 
  -2  -6   0   61.19    3.30 
  -2  -6   0   61.29    3.60 
  -2  -6   0   58.29    3.40 
   2   6   0   60.09    3.40 
   2   6   0   57.49    2.70 
  -3  -6   0   86.09    4.20 
  -3  -6   0   92.59    4.10 
  -3  -6   0   92.49    4.30 
  -3  -6   0   90.59    4.40 
   3   6   0   89.19    2.70 
   3   6   0   86.89    4.00 
  -4  -6   0    9.10    1.50 
  -4  -6   0    6.50    1.30 
  -4  -6   0   10.20    1.50 
   4   6   0    9.30    1.40 
  -5  -6   0    0.10    0.70 
  -5  -6   0    0.10    0.70 
  -5  -6   0    0.50    0.70 
   5   6   0    1.30    0.70 
  -7  -6   0   76.69    3.00 
  -7  -6   0   72.49    3.30 
  -7  -6   0   73.59    3.30 
  -8  -6   0   28.90    1.90 
  -8  -6   0   27.80    1.90 
  -8  -6   0   27.40    1.60 
  -9  -6   0    3.50    0.90 
  -9  -6   0    3.60    0.80 
 -10  -6   0    7.10    1.00 
 -10  -6   0    6.20    0.90 
 -11  -6   0   14.20    1.10 
 -11  -6   0   15.30    1.20 
  13   6   0    1.00    1.80 
  14   6   0  111.09    8.40 
  15   6   0    4.40    2.60 
  16   6   0   16.60    4.60 
  17   6   0    2.00    2.70 
  18   6   0    6.00    3.20 
  17  -7   0   21.30    5.20 
  17  -7   0   23.50    4.50 
  17  -7   0   21.50    5.30 
 -17   7   0   29.80    5.40 
 -17   7   0   28.00    4.80 
  16  -7   0    3.20    2.70 
  16  -7   0   -1.90    1.60 
  16  -7   0   -0.60    1.90 
 -16   7   0    0.30    2.10 
 -16   7   0    2.30    2.40 
  15  -7   0   34.90    5.70 
  15  -7   0   32.60    5.80 
  15  -7   0   41.40    5.70 
 -15   7   0   33.90    5.50 
 -15   7   0   44.30    5.80 
  14  -7   0   12.00    3.90 
  14  -7   0   11.80    3.50 
  14  -7   0   13.50    3.30 
 -14   7   0   18.40    4.10 
 -14   7   0   14.10    3.40 
  13  -7   0    0.20    1.90 
  13  -7   0   -0.20    1.80 
  13  -7   0    1.50    2.00 
 -13   7   0   -1.10    1.50 
 -13   7   0    1.80    2.00 
  12  -7   0    0.80    1.80 
  12  -7   0   -1.00    1.70 
  12  -7   0   -2.20    1.50 
 -12   7   0    0.00    1.60 
 -12   7   0    1.10    2.00 
 -12   7   0    0.60    1.50 
  11  -7   0    5.60    2.40 
  11  -7   0    5.70    2.10 
  11  -7   0    6.90    2.50 
  11  -7   0    7.80    2.90 
 -11   7   0    3.40    1.90 
 -11   7   0    6.40    2.30 
 -11   7   0    4.20    2.10 
  10  -7   0    1.30    1.50 
  10  -7   0    0.50    1.70 
  10  -7   0   -0.70    1.30 
  10  -7   0    1.60    1.80 
 -10   7   0   -0.10    1.50 
 -10   7   0    0.90    1.60 
 -10   7   0    0.30    1.20 
   9  -7   0   23.80    3.90 
   9  -7   0   30.90    4.20 
   9  -7   0   29.20    3.80 
  -9   7   0   26.10    3.80 
  -9   7   0   26.70    4.00 
  -9   7   0   27.00    4.20 
   8  -7   0   78.99    5.80 
   8  -7   0   76.29    5.40 
   8  -7   0   79.29    5.20 
  -8   7   0   88.19    5.50 
  -8   7   0   70.09    5.50 
  -8   7   0   82.19    5.70 
   6  -7   0    0.50    1.40 
   6  -7   0    2.60    1.40 
   6  -7   0   -0.20    1.10 
   6  -7   0    2.00    1.50 
  -6   7   0    3.80    1.90 
  -6   7   0    0.50    1.30 
  -6   7   0    3.40    1.70 
   5  -7   0   11.20    2.40 
   5  -7   0   12.10    2.30 
   5  -7   0   10.60    2.30 
   5  -7   0   10.00    2.50 
  -5   7   0    6.60    1.90 
  -5   7   0    9.20    2.30 
  -5   7   0    8.80    2.00 
   4  -7   0    0.10    1.20 
   4  -7   0    0.60    1.10 
   4  -7   0    1.00    1.20 
   4  -7   0    2.50    1.20 
  -4   7   0    0.70    1.20 
  -4   7   0    0.50    1.00 
  -4   7   0    1.50    1.30 
   3  -7   0    2.10    1.50 
   3  -7   0    6.40    1.90 
   3  -7   0    3.40    1.30 
   3  -7   0    6.40    1.80 
  -3   7   0    3.90    1.50 
  -3   7   0    7.20    1.80 
  -3   7   0    1.10    1.20 
   2  -7   0   55.69    4.00 
   2  -7   0   62.59    3.40 
   2  -7   0   62.39    4.40 
   2  -7   0   58.69    4.00 
   2  -7   0   50.79    4.00 
  -2   7   0   48.10    3.50 
  -2   7   0   62.39    4.20 
  -2   7   0   58.09    4.10 
   1  -7   0   40.60    4.20 
   1  -7   0   32.50    2.30 
   1  -7   0   41.40    3.90 
   1  -7   0   35.50    3.60 
   1  -7   0   40.90    4.10 
  -1   7   0   39.80    3.80 
  -1   7   0   39.00    2.90 
  -1   7   0   37.90    3.80 
   0  -7   0    2.80    1.30 
   0  -7   0    1.90    1.10 
   0  -7   0    1.70    1.10 
   0  -7   0    3.20    1.30 
   0  -7   0    0.70    0.70 
   0   7   0    1.00    1.10 
   0   7   0    0.20    0.90 
   0   7   0    1.50    1.00 
  -1  -7   0   40.30    3.90 
  -1  -7   0   34.90    3.40 
  -1  -7   0   36.50    3.70 
  -1  -7   0   34.60    3.40 
  -1  -7   0   37.00    3.00 
  -1  -7   0   35.30    1.70 
   1   7   0   32.90    3.30 
   1   7   0   36.80    2.50 
   1   7   0   35.60    2.90 
  -2  -7   0   59.19    3.90 
  -2  -7   0   58.89    3.90 
  -2  -7   0   55.39    3.70 
  -2  -7   0   58.89    3.60 
  -2  -7   0   59.29    3.70 
   2   7   0   59.89    3.60 
   2   7   0   54.69    2.80 
  -3  -7   0    4.40    1.30 
  -3  -7   0    3.30    1.30 
  -3  -7   0    5.90    1.40 
  -3  -7   0    5.10    1.50 
  -3  -7   0    6.50    1.50 
   3   7   0    6.50    0.80 
   3   7   0    5.20    1.40 
  -4  -7   0   -0.50    0.70 
  -4  -7   0   -0.50    0.80 
  -4  -7   0    1.80    1.10 
  -4  -7   0    0.50    0.90 
  -4  -7   0    0.50    0.90 
   4   7   0    0.30    0.80 
  -5  -7   0   11.70    1.90 
  -5  -7   0    9.90    1.60 
  -5  -7   0    8.40    1.50 
   5   7   0   11.90    1.60 
  -6  -7   0    0.50    0.90 
  -6  -7   0    0.10    0.70 
  -6  -7   0    3.40    1.10 
   6   7   0    0.90    0.70 
  -8  -7   0   80.89    3.80 
  -8  -7   0   85.09    3.90 
  -8  -7   0   82.89    3.60 
  -9  -7   0   24.10    2.00 
  -9  -7   0   19.30    1.90 
 -10  -7   0    0.10    0.60 
 -10  -7   0    0.80    0.70 
 -11  -7   0    6.30    1.10 
 -11  -7   0    3.60    0.90 
 -12  -7   0    0.80    0.50 
 -12  -7   0    0.60    0.60 
  16  -8   0   25.70    5.40 
  16  -8   0   25.60    4.80 
  16  -8   0   25.80    5.60 
 -16   8   0   35.70    6.10 
 -16   8   0   34.00    5.30 
  15  -8   0    0.30    2.10 
  15  -8   0   -1.20    1.80 
  15  -8   0    2.60    2.50 
 -15   8   0   -0.60    2.30 
 -15   8   0    4.60    2.50 
  14  -8   0    4.40    2.90 
  14  -8   0   -0.20    2.10 
  14  -8   0    2.10    2.40 
 -14   8   0    1.90    1.80 
 -14   8   0    6.40    3.00 
  13  -8   0    5.80    3.00 
  13  -8   0    7.50    2.90 
  13  -8   0    9.40    3.50 
 -13   8   0    1.80    2.10 
 -13   8   0    5.20    2.80 
  12  -8   0   27.00    4.70 
  12  -8   0   30.60    5.20 
  12  -8   0   32.30    5.20 
 -12   8   0   37.40    5.50 
 -12   8   0   30.50    4.90 
 -12   8   0   28.70    4.50 
  11  -8   0    0.10    1.60 
  11  -8   0    1.40    1.70 
  11  -8   0   -0.20    1.90 
  11  -8   0    2.30    2.00 
 -11   8   0   -0.80    1.50 
 -11   8   0    0.30    1.50 
 -11   8   0   -1.40    1.70 
  10  -8   0    8.40    2.90 
  10  -8   0    3.70    2.40 
  10  -8   0    5.80    2.20 
  10  -8   0    7.80    2.80 
 -10   8   0    8.70    2.80 
 -10   8   0    8.50    2.80 
 -10   8   0    0.30    1.40 
   9  -8   0   10.30    2.80 
   9  -8   0   14.50    3.30 
   9  -8   0    9.10    2.40 
  -9   8   0   13.60    3.30 
  -9   8   0   12.80    2.80 
  -9   8   0    9.80    2.80 
   8  -8   0    3.50    1.90 
   8  -8   0    5.10    2.00 
   8  -8   0    5.80    2.30 
  -8   8   0    4.70    1.90 
  -8   8   0    6.20    2.20 
  -8   8   0    6.90    2.10 
   7  -8   0   -1.00    1.10 
   7  -8   0   -0.70    1.40 
   7  -8   0   -0.30    1.30 
  -7   8   0   -2.40    1.00 
  -7   8   0    1.60    1.50 
  -7   8   0   -0.90    1.20 
   6  -8   0   18.10    3.20 
   6  -8   0   13.20    2.60 
   6  -8   0   19.90    3.70 
   6  -8   0   17.50    3.00 
  -6   8   0    9.70    2.40 
  -6   8   0   21.00    3.50 
  -6   8   0   17.50    3.30 
   5  -8   0   -0.50    1.20 
   5  -8   0    0.40    1.20 
   5  -8   0   -0.90    1.30 
   5  -8   0    1.80    1.60 
  -5   8   0    2.60    1.60 
  -5   8   0    1.50    1.30 
  -5   8   0    5.10    2.00 
   4  -8   0    0.10    1.30 
   4  -8   0    1.80    1.40 
   4  -8   0    0.30    1.10 
   4  -8   0    1.90    1.70 
  -4   8   0   -1.40    0.90 
  -4   8   0    1.50    1.30 
  -4   8   0    1.20    1.20 
   3  -8   0   10.60    2.40 
   3  -8   0    9.70    2.00 
   3  -8   0    5.20    1.70 
   3  -8   0    8.50    2.50 
  -3   8   0    9.80    2.30 
  -3   8   0    9.40    2.10 
  -3   8   0   11.40    2.50 
   2  -8   0  186.58    8.60 
   2  -8   0  205.98    8.60 
   2  -8   0  193.88    7.20 
   2  -8   0  189.98    8.80 
  -2   8   0  188.88    8.60 
  -2   8   0  190.18    8.60 
  -2   8   0  175.38    7.70 
   1  -8   0   38.70    4.10 
   1  -8   0   40.10    4.10 
   1  -8   0   42.30    2.70 
   1  -8   0   44.70    4.60 
  -1   8   0   33.50    3.90 
  -1   8   0   40.30    3.20 
   0  -8   0    8.70    2.20 
   0  -8   0    9.10    1.30 
   0  -8   0    5.00    1.70 
   0  -8   0    7.50    1.90 
   0  -8   0    5.60    1.90 
   0   8   0   10.40    2.30 
   0   8   0    7.70    1.70 
  -1  -8   0   43.80    4.20 
  -1  -8   0   58.29    5.10 
  -1  -8   0   47.90    4.50 
  -1  -8   0   39.10    3.80 
   1   8   0   41.20    4.00 
   1   8   0   37.90    2.80 
  -2  -8   0  185.48    7.80 
  -2  -8   0  190.28    8.20 
  -2  -8   0  184.48    7.90 
  -2  -8   0  192.38    8.30 
   2   8   0  194.48    7.90 
   2   8   0  192.38    6.60 
  -3  -8   0   10.10    2.00 
  -3  -8   0    6.70    2.00 
  -3  -8   0    9.90    2.30 
  -3  -8   0    7.90    1.80 
   3   8   0    7.80    1.80 
  -4  -8   0    0.70    1.00 
  -4  -8   0    2.40    1.20 
   4   8   0    1.00    1.00 
  -5  -8   0    0.90    1.00 
  -5  -8   0    1.00    1.00 
   5   8   0    1.90    1.10 
  -6  -8   0   16.90    2.30 
  -6  -8   0   14.90    2.20 
   6   8   0   18.00    2.00 
  -7  -8   0   -0.80    0.70 
  -7  -8   0   -0.30    0.80 
   7   8   0   -0.20    0.50 
  -8  -8   0    4.80    1.20 
  -9  -8   0    8.90    1.60 
 -10  -8   0    4.90    1.20 
 -11  -8   0   -0.30    0.70 
 -12  -8   0   31.70    2.10 
 -13  -8   0    6.30    1.00 
  16  -9   0   31.90    6.10 
  16  -9   0   15.60    4.90 
  16  -9   0   20.50    4.80 
 -16   9   0   17.40    4.30 
  15  -9   0   20.30    4.90 
  15  -9   0   13.10    4.10 
  15  -9   0   18.60    4.70 
 -15   9   0   17.90    4.30 
 -15   9   0   24.60    5.20 
  14  -9   0   -0.40    2.10 
  14  -9   0    2.40    2.50 
  14  -9   0    1.50    2.50 
 -14   9   0    0.80    2.40 
 -14   9   0    3.30    2.30 
  13  -9   0    1.70    2.20 
  13  -9   0    0.70    2.10 
  13  -9   0   -1.10    1.80 
 -13   9   0    1.10    2.00 
 -13   9   0   -1.20    1.90 
  12  -9   0   31.20    5.30 
  12  -9   0   28.60    5.50 
  12  -9   0   30.10    5.00 
 -12   9   0   35.60    5.40 
 -12   9   0   15.60    3.90 
 -12   9   0   29.80    5.10 
  11  -9   0    8.40    3.30 
  11  -9   0    4.40    2.60 
  11  -9   0   12.40    3.10 
  11  -9   0   10.90    3.20 
 -11   9   0   11.40    3.30 
 -11   9   0    4.40    2.00 
 -11   9   0   13.60    4.00 
  10  -9   0   96.09    6.60 
  10  -9   0   97.19    7.40 
  10  -9   0   94.29    6.90 
 -10   9   0   91.99    6.70 
 -10   9   0   88.19    8.50 
 -10   9   0   90.09    7.00 
   9  -9   0   14.60    3.40 
   9  -9   0    8.70    2.60 
   9  -9   0   11.40    2.90 
  -9   9   0   16.20    3.60 
  -9   9   0   13.20    2.80 
  -9   9   0   13.20    3.20 
   8  -9   0   -0.80    1.60 
   8  -9   0    0.10    1.40 
   8  -9   0   -0.70    1.40 
  -8   9   0    1.60    1.70 
  -8   9   0    3.80    2.20 
  -8   9   0    1.60    1.90 
   7  -9   0    2.00    1.80 
   7  -9   0    2.20    1.80 
   7  -9   0    0.50    1.60 
  -7   9   0    2.10    2.00 
  -7   9   0   -0.40    1.50 
  -7   9   0    2.60    2.00 
   6  -9   0   44.90    5.30 
   6  -9   0   48.90    5.00 
   6  -9   0   52.19    6.00 
   6  -9   0   45.40    5.10 
  -6   9   0   47.10    5.50 
  -6   9   0   44.80    5.00 
   5  -9   0   25.40    3.80 
   5  -9   0   20.10    3.70 
   5  -9   0   21.90    3.70 
   5  -9   0   21.40    3.20 
  -5   9   0   33.00    4.10 
  -5   9   0   23.60    4.00 
   4  -9   0   15.90    2.60 
   4  -9   0    9.10    2.50 
   4  -9   0   10.30    2.80 
   4  -9   0    6.00    2.10 
  -4   9   0    7.10    2.40 
  -4   9   0   13.00    2.80 
   3  -9   0   21.70    3.40 
   3  -9   0   24.50    2.90 
   3  -9   0   26.80    4.10 
   3  -9   0   18.10    3.40 
  -3   9   0   24.30    3.70 
  -3   9   0   26.60    3.50 
   2  -9   0   -0.30    1.30 
   2  -9   0    1.90    1.80 
   2  -9   0   -0.10    1.30 
   2  -9   0    1.90    1.10 
  -2   9   0    0.30    1.30 
  -2   9   0    5.20    1.80 
   1  -9   0  113.09    6.70 
   1  -9   0  109.29    6.20 
   1  -9   0  112.19    6.40 
  -1   9   0  104.09    6.20 
  -1   9   0  104.79    5.60 
   0  -9   0    0.00    1.20 
   0  -9   0    0.90    1.60 
   0  -9   0    2.40    1.50 
   0   9   0    0.20    1.00 
   0   9   0   -0.80    1.00 
  -1  -9   0  106.09    6.00 
  -1  -9   0  103.79    6.10 
  -1  -9   0  113.29    6.20 
   1   9   0  108.09    5.10 
   1   9   0  111.59    6.00 
  -2  -9   0    2.40    1.40 
  -2  -9   0    1.50    1.50 
   2   9   0    2.60    1.50 
  -3  -9   0   18.70    2.80 
  -3  -9   0   16.10    2.60 
   3   9   0   27.70    3.30 
  -4  -9   0   10.60    2.20 
  -4  -9   0    9.80    2.20 
   4   9   0   13.20    2.30 
  -5  -9   0   25.10    3.10 
  -5  -9   0   24.20    3.00 
   5   9   0   22.60    2.70 
  -6  -9   0   37.40    3.70 
  -6  -9   0   45.30    3.50 
   6   9   0   45.70    3.00 
  -7  -9   0    3.20    1.50 
  -7  -9   0    1.90    1.20 
   7   9   0    2.00    0.90 
  -8  -9   0    1.80    1.20 
  -8  -9   0    2.60    1.30 
  -9  -9   0   11.80    1.90 
 -10  -9   0   87.89    4.50 
 -11  -9   0    6.60    1.40 
 -12  -9   0   25.00    2.40 
 -13  -9   0    2.90    0.90 
 -15  10   0    3.50    2.80 
  14 -10   0   58.89    7.90 
  14 -10   0   63.39    8.40 
  14 -10   0   56.09    7.50 
 -14  10   0   59.39    7.40 
  13 -10   0   -2.90    2.00 
  13 -10   0   -3.60    2.20 
  13 -10   0    1.80    2.60 
 -13  10   0   -0.20    2.20 
 -13  10   0   -0.50    2.30 
  12 -10   0    3.10    2.60 
  12 -10   0    3.20    2.90 
  12 -10   0    4.20    2.60 
 -12  10   0    0.10    2.20 
 -12  10   0    7.70    3.00 
  11 -10   0    0.00    2.00 
  11 -10   0   -0.70    2.00 
  11 -10   0    1.80    2.10 
  11 -10   0    1.60    2.10 
 -11  10   0    0.00    1.90 
 -11  10   0    0.00    2.10 
  10 -10   0   20.50    4.50 
  10 -10   0   29.40    4.60 
  10 -10   0   27.00    4.50 
 -10  10   0   25.30    4.60 
 -10  10   0   26.50    4.80 
   9 -10   0   28.90    4.50 
   9 -10   0   29.50    5.30 
   9 -10   0   36.30    5.10 
  -9  10   0   27.10    4.50 
  -9  10   0   27.10    4.80 
   8 -10   0    0.70    1.80 
   8 -10   0   -1.50    1.70 
   8 -10   0   -1.50    1.70 
  -8  10   0    1.50    2.10 
  -8  10   0   -1.30    1.60 
   7 -10   0    0.30    1.50 
   7 -10   0    1.10    2.00 
   7 -10   0    0.50    1.70 
  -7  10   0    2.70    2.00 
  -7  10   0   -0.60    1.30 
   6 -10   0   18.50    3.20 
   6 -10   0   18.90    3.60 
   6 -10   0   19.00    3.90 
  -6  10   0   16.60    3.50 
  -6  10   0   11.70    2.80 
   5 -10   0   23.60    4.10 
   5 -10   0   18.80    3.10 
   5 -10   0   24.10    4.40 
   5 -10   0   19.40    3.50 
  -5  10   0   16.00    3.10 
  -5  10   0   19.00    3.80 
   4 -10   0   76.99    5.70 
   4 -10   0   80.19    6.10 
   4 -10   0   84.99    6.50 
   4 -10   0   75.99    4.90 
  -4  10   0   86.19    6.30 
  -4  10   0   78.89    5.40 
   3 -10   0    1.50    1.80 
   3 -10   0    2.40    1.90 
   3 -10   0   -0.40    1.50 
  -3  10   0    0.60    1.60 
  -3  10   0    1.30    1.40 
   2 -10   0    8.90    2.60 
   2 -10   0    8.50    2.70 
   2 -10   0    5.50    2.20 
  -2  10   0    7.50    2.20 
  -2  10   0    8.50    2.60 
   1 -10   0  164.38    8.40 
   1 -10   0  162.58    8.80 
   1 -10   0  174.48    8.90 
  -1  10   0  172.78    7.70 
  -1  10   0  178.88    8.80 
   0 -10   0   28.00    4.50 
   0 -10   0   26.20    3.70 
   0 -10   0   28.10    3.90 
   0  10   0   25.90    3.80 
  -1 -10   0  169.58    8.40 
  -1 -10   0  163.68    8.10 
   1  10   0  177.88    8.40 
  -2 -10   0    7.80    2.10 
  -2 -10   0   12.90    2.80 
   2  10   0    7.50    2.10 
  -3 -10   0   -0.10    1.20 
  -3 -10   0    0.20    1.40 
   3  10   0    0.60    1.30 
  -4 -10   0   87.29    5.30 
  -4 -10   0   74.09    5.00 
   4  10   0   72.69    4.60 
  -5 -10   0   18.70    2.90 
  -5 -10   0   20.90    3.10 
   5  10   0   18.40    2.70 
  -6 -10   0   14.00    2.60 
  -6 -10   0   11.90    2.30 
   6  10   0   15.90    2.30 
  -7 -10   0    0.90    1.20 
  -7 -10   0    1.20    1.40 
   7  10   0    2.60    1.10 
  -8 -10   0    1.70    1.20 
  -8 -10   0   -0.10    1.20 
  -9 -10   0   31.30    3.40 
 -10 -10   0   28.10    3.10 
 -11 -10   0    1.40    1.20 
 -12 -10   0    2.70    1.20 
 -13 -10   0    1.10    1.00 
 -14 -10   0   64.19    3.00 
  13 -11   0    1.10    2.60 
  13 -11   0    3.80    3.20 
  13 -11   0   -2.40    2.30 
 -13  11   0   -0.30    2.10 
 -13  11   0    4.20    3.10 
  12 -11   0   11.70    3.60 
  12 -11   0   10.70    3.80 
  12 -11   0    9.20    3.60 
 -12  11   0    5.80    3.20 
 -12  11   0   12.10    3.70 
  11 -11   0    9.50    4.00 
  11 -11   0    7.60    3.30 
  11 -11   0   11.70    3.50 
  11 -11   0   11.20    3.50 
 -11  11   0   15.00    3.80 
 -11  11   0   11.80    3.90 
  10 -11   0   -0.70    1.90 
  10 -11   0   -0.90    2.30 
  10 -11   0    0.70    2.20 
 -10  11   0   -0.90    2.10 
 -10  11   0    2.00    2.10 
   9 -11   0    3.60    2.30 
   9 -11   0   -0.80    2.10 
   9 -11   0   -1.20    1.80 
  -9  11   0    0.50    1.70 
  -9  11   0    2.20    2.10 
   8 -11   0   46.00    6.60 
   8 -11   0   54.79    6.00 
   8 -11   0   49.30    6.00 
  -8  11   0   60.59    6.60 
  -8  11   0   51.29    6.50 
   7 -11   0   43.50    6.10 
   7 -11   0   54.19    5.80 
   7 -11   0   35.20    5.10 
  -7  11   0   51.69    6.00 
  -7  11   0   39.00    5.60 
   6 -11   0    0.50    1.90 
   6 -11   0    0.00    1.90 
  -6  11   0   -0.40    1.80 
  -6  11   0   -0.70    1.60 
   5 -11   0    4.70    2.30 
   5 -11   0    2.60    2.00 
   5 -11   0    4.60    2.70 
  -5  11   0    5.30    2.60 
  -5  11   0    4.80    2.20 
   4 -11   0    1.60    1.90 
   4 -11   0    1.80    2.40 
   4 -11   0   -0.60    1.50 
  -4  11   0    1.20    1.90 
  -4  11   0    0.10    1.70 
   3 -11   0    7.30    2.60 
   3 -11   0    1.90    2.50 
   3 -11   0    5.70    2.40 
  -3  11   0    5.60    2.10 
  -3  11   0    3.30    2.00 
   2 -11   0    5.90    2.30 
   2 -11   0   13.00    3.10 
   2 -11   0   13.90    3.50 
  -2  11   0    9.60    2.70 
  -2  11   0    8.20    2.30 
   1 -11   0   15.60    3.50 
   1 -11   0   15.00    3.40 
   1 -11   0   16.60    3.30 
  -1  11   0   20.40    3.70 
   0 -11   0   -1.20    1.00 
   0 -11   0    0.90    1.70 
   0  11   0   -1.00    1.20 
  -1 -11   0   24.10    3.80 
  -1 -11   0   23.90    3.90 
   1  11   0   23.90    3.70 
  -2 -11   0    5.70    2.10 
  -2 -11   0    4.80    2.10 
   2  11   0    5.90    2.00 
  -3 -11   0    2.10    1.70 
  -3 -11   0    5.30    2.20 
   3  11   0    5.80    2.00 
  -4 -11   0   -1.30    1.10 
  -4 -11   0    0.00    1.50 
   4  11   0    3.90    1.60 
  -5 -11   0    3.90    1.90 
  -5 -11   0    5.40    2.00 
   5  11   0    1.80    1.50 
  -6 -11   0   -0.40    1.40 
  -6 -11   0    0.50    1.20 
   6  11   0    0.70    1.20 
  -7 -11   0   39.00    4.20 
  -7 -11   0   45.80    4.60 
  -8 -11   0   47.90    4.70 
  -8 -11   0   56.09    4.40 
  -9 -11   0    0.10    1.20 
 -10 -11   0    1.80    1.40 
 -11 -11   0    9.20    2.10 
 -12 -11   0    9.70    2.00 
 -13 -11   0   -0.80    1.00 
  12 -12   0   -0.20    2.60 
  12 -12   0    3.90    2.90 
  12 -12   0    1.10    3.10 
 -12  12   0    4.80    3.00 
 -12  12   0   -0.70    2.20 
  11 -12   0   -1.60    2.00 
  11 -12   0    3.20    3.00 
  11 -12   0   -1.90    2.70 
  11 -12   0   -1.90    2.10 
 -11  12   0   -2.60    2.20 
 -11  12   0    3.20    2.60 
  10 -12   0   29.00    5.10 
  10 -12   0   31.60    5.90 
  10 -12   0   30.10    5.50 
 -10  12   0   28.30    4.90 
 -10  12   0   15.10    3.90 
   9 -12   0   29.20    5.70 
   9 -12   0   35.40    5.40 
  -9  12   0   31.40    5.30 
  -9  12   0   38.30    6.20 
   8 -12   0   -1.10    2.50 
   8 -12   0    1.10    2.30 
  -8  12   0    0.20    2.10 
  -8  12   0    2.30    2.70 
   7 -12   0  101.19    9.90 
   7 -12   0   89.29    7.10 
  -7  12   0   99.79    7.40 
  -7  12   0   81.99    8.60 
   6 -12   0    5.20    2.70 
   6 -12   0    5.00    2.80 
  -6  12   0    1.70    2.20 
  -6  12   0    2.00    2.30 
   5 -12   0   36.40    5.30 
   5 -12   0   29.60    5.20 
  -5  12   0   44.40    5.60 
  -5  12   0   35.50    5.40 
   4 -12   0   13.30    3.70 
   4 -12   0   13.00    3.50 
   4 -12   0   10.40    3.10 
  -4  12   0    6.30    2.70 
  -4  12   0    6.10    2.50 
   3 -12   0    0.30    1.80 
   3 -12   0    3.30    2.30 
   3 -12   0    0.80    2.10 
  -3  12   0    2.80    2.20 
   2 -12   0    4.50    2.80 
   2 -12   0    5.30    2.60 
   2 -12   0    0.80    1.80 
  -2  12   0    3.60    2.40 
   1 -12   0   -0.20    1.60 
   1 -12   0   -0.20    1.80 
  -1  12   0    0.30    1.60 
   0 -12   0   14.00    3.20 
   0 -12   0   16.10    3.50 
   0  12   0   11.80    2.90 
  -1 -12   0    1.60    1.70 
  -1 -12   0    0.00    1.80 
   1  12   0    0.70    1.60 
  -2 -12   0    2.80    1.80 
  -2 -12   0    3.00    2.10 
   2  12   0    2.10    1.80 
  -3 -12   0   -1.20    1.30 
  -3 -12   0    0.40    1.70 
   3  12   0    1.30    1.80 
  -4 -12   0    7.50    2.40 
  -4 -12   0    2.40    1.80 
   4  12   0    9.00    2.40 
  -5 -12   0   37.90    4.70 
  -5 -12   0   35.50    4.50 
   5  12   0   45.50    4.60 
  -6 -12   0    8.30    2.40 
  -6 -12   0    6.00    2.40 
   6  12   0    7.00    2.00 
  -7 -12   0   97.89    6.30 
  -7 -12   0   85.89    5.90 
  -8 -12   0    1.00    1.50 
  -8 -12   0    2.70    1.90 
  -9 -12   0   29.20    3.70 
 -10 -12   0   23.60    3.30 
 -11 -12   0    0.30    1.30 
 -12 -12   0    4.40    1.70 
  10 -13   0    7.00    3.80 
  10 -13   0    8.20    3.60 
 -10  13   0    8.20    3.50 
 -10  13   0    7.20    3.40 
   9 -13   0   -1.00    2.30 
   9 -13   0   -2.70    2.10 
  -9  13   0    2.50    2.90 
  -9  13   0   -0.80    2.50 
   8 -13   0   20.10    4.80 
   8 -13   0   16.70    4.20 
  -8  13   0   12.80    4.30 
  -8  13   0   11.70    3.90 
   7 -13   0   43.50    6.80 
   7 -13   0   48.80    6.80 
  -7  13   0   35.70    6.00 
  -7  13   0   36.60    5.60 
   6 -13   0   18.60    4.40 
   6 -13   0   18.30    4.90 
  -6  13   0   13.40    4.00 
  -6  13   0   12.90    3.90 
   5 -13   0   51.59    6.60 
   5 -13   0   50.39    7.00 
  -5  13   0   52.69    6.70 
   4 -13   0   29.00    5.90 
   4 -13   0   42.40    6.60 
   4 -13   0   41.40    5.90 
  -4  13   0   35.70    5.80 
   3 -13   0   -1.10    1.90 
   3 -13   0   -2.80    1.80 
   3 -13   0   -0.80    1.80 
  -3  13   0    1.30    1.90 
   2 -13   0    3.50    2.40 
   2 -13   0    0.30    2.00 
  -2  13   0    3.20    2.30 
   1 -13   0   18.60    4.10 
   1 -13   0   11.90    3.30 
  -1  13   0   16.50    3.70 
   0 -13   0   -1.00    1.90 
   0 -13   0    1.30    2.00 
   0  13   0    0.10    1.60 
  -1 -13   0   13.80    3.50 
  -1 -13   0   14.60    3.70 
   1  13   0   25.30    4.20 
  -2 -13   0    4.40    2.60 
  -2 -13   0    3.70    2.30 
   2  13   0    0.20    1.70 
  -3 -13   0   -2.70    1.60 
  -3 -13   0    0.20    1.70 
   3  13   0    0.10    1.60 
  -4 -13   0   37.30    5.10 
  -4 -13   0   33.70    4.80 
   4  13   0   37.00    4.60 
  -5 -13   0   45.00    5.50 
  -5 -13   0   62.19    6.40 
   5  13   0   55.49    5.20 
  -6 -13   0   12.00    3.00 
  -6 -13   0   19.20    3.70 
   6  13   0   15.30    2.90 
  -7 -13   0   32.70    4.50 
  -7 -13   0   37.20    5.00 
  -8 -13   0    7.20    2.90 
  -8 -13   0   15.70    3.20 
  -9 -13   0    2.40    1.80 
 -10 -13   0    3.40    1.90 
   7 -14   0   45.30    7.40 
   7 -14   0   34.90    6.00 
  -7  14   0   38.00    6.20 
   6 -14   0   -0.10    2.50 
   6 -14   0    1.40    3.30 
  -6  14   0    0.70    2.40 
   5 -14   0   -0.50    2.60 
   5 -14   0    6.40    3.20 
  -5  14   0    0.80    2.50 
   4 -14   0    0.30    2.40 
  -4  14   0    5.60    2.80 
   3 -14   0    2.30    2.40 
   3 -14   0    4.90    2.80 
  -3  14   0    1.30    2.30 
   2 -14   0    9.80    3.60 
   2 -14   0   12.80    3.70 
  -2  14   0    9.50    3.40 
   1 -14   0    2.30    2.40 
   1 -14   0    2.00    2.50 
  -1  14   0    6.30    2.80 
   0 -14   0    1.10    2.40 
   0 -14   0    2.40    2.10 
   0  14   0    2.10    2.10 
  -1 -14   0    0.80    2.10 
  -1 -14   0    2.80    2.40 
   1  14   0    2.50    2.10 
  -2 -14   0    9.70    3.00 
  -2 -14   0    8.20    3.20 
   2  14   0   12.70    3.30 
  -3 -14   0   -0.40    2.10 
  -3 -14   0    1.20    2.00 
   3  14   0   -0.90    1.80 
  -4 -14   0    4.30    2.40 
  -4 -14   0    0.50    2.40 
   4  14   0    7.30    2.60 
  -5 -14   0    1.30    2.20 
  -5 -14   0    0.90    1.80 
   5  14   0    1.20    1.70 
  -6 -14   0    1.40    1.90 
  -6 -14   0    0.70    2.20 
  -7 -14   0   28.20    4.50 
  -7 -14   0   40.10    5.40 
   3 -15   0    1.10    2.80 
  -3  15   0    1.20    2.70 
   2 -15   0    8.00    3.60 
   2 -15   0   13.00    4.10 
  -2  15   0    8.90    3.60 
   1 -15   0    0.20    2.40 
   1 -15   0    2.50    2.60 
  -1  15   0    2.70    2.50 
   0 -15   0   -1.80    2.10 
   0 -15   0   -1.70    2.20 
   0  15   0   -0.50    2.00 
  -1 -15   0   -0.40    2.30 
  -1 -15   0   -1.60    2.10 
   1  15   0    0.30    2.20 
  -2 -15   0   10.40    3.90 
  -2 -15   0   12.60    3.90 
   2  15   0   10.60    3.30 
  -3 -15   0    1.10    2.40 
  -3 -15   0   -0.70    2.00 
   3  15   0   -0.20    1.80 
   3  15  -1   36.00    5.10 
  -3 -15   1   22.60    4.60 
  -3 -15   1   33.70    5.50 
   2  15  -1   14.90    3.70 
  -2 -15   1   24.90    4.90 
  -2 -15   1   28.70    5.40 
   1  15  -1   12.20    3.70 
  -1 -15   1   18.80    4.30 
  -1 -15   1    9.40    3.40 
   0  15  -1   19.00    4.30 
   0 -15   1   30.80    5.60 
   0 -15   1   20.10    4.60 
  -1  15  -1    5.00    2.70 
   1 -15   1    1.20    2.60 
   1 -15   1    2.70    2.50 
  -2  15  -1   -1.60    2.20 
   2 -15   1    1.20    2.80 
   2 -15   1    0.00    2.50 
  -3  15  -1   27.60    5.20 
   3 -15   1   35.50    6.00 
  -7 -14   1    4.70    2.30 
  -7 -14   1    6.50    3.00 
  -6 -14   1   26.00    4.40 
  -6 -14   1   20.80    4.00 
   5  14  -1   21.50    3.50 
  -5 -14   1   27.00    4.50 
  -5 -14   1   14.40    3.70 
   4  14  -1   74.89    5.80 
  -4 -14   1   87.49    7.00 
  -4 -14   1   73.69    7.50 
   3  14  -1   -1.70    1.50 
  -3 -14   1   -1.40    1.90 
  -3 -14   1   -0.40    1.80 
   2  14  -1    1.00    2.10 
  -2 -14   1    2.20    2.10 
  -2 -14   1    3.60    2.90 
   1  14  -1    3.20    2.20 
  -1 -14   1   -0.60    1.90 
  -1 -14   1   -0.40    2.10 
   0  14  -1    2.80    2.30 
   0 -14   1   -0.10    1.90 
   0 -14   1    0.20    2.20 
  -1  14  -1   10.20    3.30 
   1 -14   1    7.90    3.30 
   1 -14   1   13.50    3.70 
  -2  14  -1   11.50    3.40 
   2 -14   1   11.30    3.80 
   2 -14   1    7.00    3.20 
  -3  14  -1   -0.70    2.10 
   3 -14   1    0.70    2.50 
   3 -14   1    2.60    2.50 
  -4  14  -1    0.00    2.30 
   4 -14   1   -1.30    2.10 
  -5  14  -1    4.30    3.30 
   5 -14   1   15.20    4.80 
   5 -14   1    7.10    3.60 
  -6  14  -1    4.80    3.00 
   6 -14   1   11.30    4.30 
   6 -14   1    4.90    3.10 
  -7  14  -1    0.80    2.70 
   7 -14   1    1.20    2.90 
   7 -14   1    2.20    3.00 
 -10 -13   1   -0.20    1.50 
  -9 -13   1   25.90    3.80 
  -8 -13   1   54.59    5.80 
  -8 -13   1   44.40    5.00 
  -7 -13   1   -0.70    1.50 
  -7 -13   1    2.40    2.20 
   6  13  -1   43.30    4.40 
  -6 -13   1   40.90    5.00 
  -6 -13   1   40.30    5.20 
   5  13  -1    7.00    2.10 
  -5 -13   1    8.90    2.90 
  -5 -13   1    7.70    2.70 
   4  13  -1    6.10    2.30 
  -4 -13   1    9.90    2.90 
  -4 -13   1    9.30    2.70 
   3  13  -1   26.40    4.20 
  -3 -13   1   19.50    3.80 
  -3 -13   1   19.80    3.90 
   2  13  -1   15.00    3.20 
  -2 -13   1   10.60    3.00 
  -2 -13   1   14.90    3.60 
   1  13  -1    0.10    1.60 
  -1 -13   1    1.00    1.80 
  -1 -13   1   -2.50    1.70 
   0  13  -1   28.00    4.60 
   0 -13   1   25.80    4.60 
   0 -13   1   32.40    5.00 
  -1  13  -1   -0.80    1.90 
   1 -13   1   -1.10    1.80 
   1 -13   1    0.50    1.90 
  -2  13  -1   33.00    5.20 
   2 -13   1   28.50    4.90 
   2 -13   1   36.90    5.40 
  -3  13  -1    0.50    2.10 
   3 -13   1    1.20    2.10 
   3 -13   1    2.80    2.70 
   3 -13   1   -1.20    1.60 
  -4  13  -1    7.00    2.90 
   4 -13   1    6.20    3.00 
   4 -13   1   12.00    4.20 
   4 -13   1   15.80    4.50 
  -5  13  -1    2.30    2.20 
   5 -13   1    7.80    3.10 
   5 -13   1    2.90    2.70 
  -6  13  -1   13.40    3.80 
   6 -13   1    7.80    3.70 
   6 -13   1   19.80    4.50 
  -7  13  -1    3.10    2.50 
  -7  13  -1   -1.30    2.10 
   7 -13   1    1.00    2.90 
   7 -13   1    1.60    2.60 
  -8  13  -1   30.20    5.80 
  -8  13  -1   35.70    5.60 
   8 -13   1   33.20    6.30 
   8 -13   1   33.20    5.70 
  -9  13  -1    9.30    3.50 
  -9  13  -1   15.80    4.40 
   9 -13   1   25.90    5.10 
   9 -13   1   22.00    5.50 
 -10  13  -1   50.29    7.30 
 -10  13  -1   54.49    7.70 
  10 -13   1   54.69    7.80 
  10 -13   1   58.59    7.60 
 -12 -12   1   -0.10    1.20 
 -11 -12   1   14.40    2.70 
 -10 -12   1   10.90    2.40 
  -9 -12   1   -0.50    1.30 
  -8 -12   1   -0.60    1.20 
  -8 -12   1    0.50    1.80 
  -7 -12   1   55.99    5.60 
  -7 -12   1   67.09    5.20 
   6  12  -1   14.10    2.40 
  -6 -12   1   10.30    2.50 
  -6 -12   1   18.00    3.40 
   5  12  -1    0.30    1.40 
  -5 -12   1    2.60    1.80 
  -5 -12   1    1.30    1.70 
   4  12  -1   54.09    5.30 
  -4 -12   1   50.59    5.40 
  -4 -12   1   41.70    5.00 
   3  12  -1    9.60    2.50 
  -3 -12   1    6.70    2.40 
  -3 -12   1    5.50    2.40 
   2  12  -1    7.80    2.50 
  -2 -12   1    7.00    2.50 
  -2 -12   1   10.30    2.70 
   1  12  -1  100.09    6.50 
  -1 -12   1   75.79    6.20 
  -1 -12   1   86.69    6.40 
   0  12  -1   -0.40    1.60 
   0 -12   1    6.50    2.50 
   0 -12   1    2.00    1.90 
  -1  12  -1   55.49    6.00 
   1 -12   1   56.99    6.30 
   1 -12   1   65.59    6.70 
  -2  12  -1    6.90    2.70 
   2 -12   1    3.60    2.20 
   2 -12   1    7.10    3.00 
   2 -12   1    4.10    2.40 
  -3  12  -1   12.70    3.20 
   3 -12   1    8.80    2.80 
   3 -12   1   14.00    3.90 
   3 -12   1    9.10    3.00 
  -4  12  -1    3.60    2.20 
  -4  12  -1    7.50    3.10 
   4 -12   1    9.50    3.50 
   4 -12   1    2.00    2.30 
   4 -12   1    6.00    2.70 
  -5  12  -1    1.00    1.90 
  -5  12  -1    2.20    2.20 
   5 -12   1    4.10    2.40 
   5 -12   1    2.90    2.60 
  -6  12  -1   35.00    5.20 
  -6  12  -1   34.70    5.40 
   6 -12   1   49.10    6.70 
   6 -12   1   34.60    5.30 
  -7  12  -1    7.70    3.40 
  -7  12  -1   10.10    3.20 
   7 -12   1   12.40    4.00 
   7 -12   1    8.80    3.20 
  -8  12  -1    8.70    3.20 
  -8  12  -1   12.00    3.80 
   8 -12   1    8.70    3.60 
   8 -12   1   17.00    3.80 
  -9  12  -1   27.50    5.10 
  -9  12  -1   14.80    4.20 
   9 -12   1   24.90    5.10 
   9 -12   1   17.00    4.20 
 -10  12  -1    1.70    2.30 
 -10  12  -1   -2.10    1.90 
  10 -12   1   -1.00    2.30 
  10 -12   1    0.90    2.30 
 -11  12  -1    2.60    3.30 
 -11  12  -1    4.40    3.10 
  11 -12   1    5.50    3.00 
  11 -12   1    2.10    2.90 
  11 -12   1    1.80    3.00 
 -12  12  -1    1.80    3.20 
 -12  12  -1   -1.70    2.40 
  12 -12   1    1.20    2.40 
  12 -12   1   -0.80    2.30 
  12 -12   1    0.80    3.00 
 -13 -11   1   11.60    2.00 
 -12 -11   1    5.30    1.60 
 -11 -11   1   12.40    2.30 
 -10 -11   1    0.80    1.20 
  -9 -11   1    6.00    1.80 
  -8 -11   1   25.50    3.50 
  -8 -11   1   27.40    3.60 
  -7 -11   1    6.60    2.00 
  -7 -11   1    3.10    1.90 
   6  11  -1   24.80    3.00 
  -6 -11   1   26.70    3.70 
  -6 -11   1   19.80    3.40 
   5  11  -1   31.90    3.60 
  -5 -11   1   29.30    3.90 
  -5 -11   1   26.40    3.70 
   4  11  -1   19.40    3.10 
  -4 -11   1   19.50    3.30 
  -4 -11   1   20.10    3.50 
   3  11  -1   46.40    4.70 
  -3 -11   1   38.00    4.60 
  -3 -11   1   35.20    4.50 
   2  11  -1   -1.80    1.10 
  -2 -11   1   -0.50    1.30 
  -2 -11   1   -0.80    1.40 
   1  11  -1    7.90    2.40 
  -1 -11   1    6.50    2.40 
  -1 -11   1   13.00    2.90 
   0  11  -1   29.20    4.10 
   0 -11   1   46.20    5.30 
   0 -11   1   37.20    4.90 
  -1  11  -1   77.99    5.80 
   1 -11   1   76.39    7.50 
   1 -11   1   73.29    6.90 
   1 -11   1   68.29    5.60 
  -2  11  -1   26.40    4.20 
  -2  11  -1   28.00    3.90 
   2 -11   1   24.10    4.00 
   2 -11   1   30.70    4.60 
   2 -11   1   43.20    5.50 
  -3  11  -1   11.40    3.00 
  -3  11  -1   15.00    2.90 
   3 -11   1   16.50    3.50 
   3 -11   1   13.90    3.20 
   3 -11   1   22.20    4.40 
  -4  11  -1   19.50    4.00 
  -4  11  -1   22.90    3.90 
   4 -11   1   27.00    4.60 
   4 -11   1   20.20    3.80 
   4 -11   1   19.50    4.10 
  -5  11  -1   -0.70    1.80 
  -5  11  -1   -1.70    1.40 
   5 -11   1   -0.60    1.70 
   5 -11   1    0.20    2.30 
   5 -11   1   -1.20    1.70 
  -6  11  -1   54.29    5.80 
  -6  11  -1   59.79    6.90 
   6 -11   1   47.50    6.40 
   6 -11   1   64.89    6.60 
  -7  11  -1   -2.40    1.50 
  -7  11  -1   -1.50    1.60 
   7 -11   1    3.60    2.80 
   7 -11   1    1.80    2.20 
   7 -11   1    1.30    1.80 
  -8  11  -1   15.20    3.80 
  -8  11  -1   24.60    4.30 
   8 -11   1   27.10    4.50 
   8 -11   1   27.20    4.30 
   8 -11   1   22.30    4.70 
  -9  11  -1    0.60    2.10 
  -9  11  -1    2.20    2.10 
   9 -11   1    2.30    2.10 
   9 -11   1   -1.00    2.10 
   9 -11   1    1.50    2.10 
 -10  11  -1   30.20    5.00 
 -10  11  -1   42.00    6.20 
  10 -11   1   32.40    5.80 
  10 -11   1   41.60    5.80 
  10 -11   1   37.00    5.40 
 -11  11  -1   48.60    6.40 
 -11  11  -1   48.70    6.90 
  11 -11   1   48.80    6.40 
  11 -11   1   51.79    6.20 
  11 -11   1   49.10    7.00 
 -12  11  -1    2.00    3.00 
 -12  11  -1   -1.60    1.90 
  12 -11   1   -0.60    2.70 
  12 -11   1   -1.80    2.20 
  12 -11   1   -2.50    2.30 
 -13  11  -1   76.29    8.80 
 -13  11  -1   67.79    8.10 
  13 -11   1   51.19    7.70 
  13 -11   1   56.49    7.40 
  13 -11   1   45.70    7.20 
 -14 -10   1   -0.10    0.70 
 -13 -10   1   10.50    1.60 
 -12 -10   1   11.00    1.90 
 -11 -10   1   -1.10    0.80 
 -10 -10   1   31.50    3.20 
  -9 -10   1    9.20    2.00 
  -8 -10   1   22.00    3.00 
  -8 -10   1   21.40    3.00 
   7  10  -1   17.20    2.10 
  -7 -10   1   20.80    2.90 
  -7 -10   1   13.70    2.40 
   6  10  -1    4.40    1.40 
  -6 -10   1    7.20    2.10 
  -6 -10   1    1.70    1.40 
   5  10  -1    2.10    1.30 
  -5 -10   1    0.30    1.20 
  -5 -10   1    2.80    1.50 
   4  10  -1   60.59    4.10 
  -4 -10   1   58.29    4.40 
  -4 -10   1   60.99    4.50 
   3  10  -1  166.88    7.70 
  -3 -10   1  179.88    8.10 
  -3 -10   1  150.08    7.80 
   2  10  -1   -0.80    1.20 
  -2 -10   1   -0.60    1.20 
  -2 -10   1    0.30    1.30 
   1  10  -1   87.29    5.60 
  -1 -10   1   90.39    5.90 
  -1 -10   1   85.79    5.70 
   0  10  -1    7.20    2.30 
   0 -10   1    7.10    2.30 
   0 -10   1    7.50    2.50 
   0 -10   1    3.20    2.00 
  -1  10  -1  163.18    7.40 
  -1  10  -1  156.18    8.20 
   1 -10   1  159.78    8.40 
   1 -10   1  165.38    8.40 
   1 -10   1  158.48    8.70 
  -2  10  -1   25.60    3.40 
  -2  10  -1   29.10    4.10 
   2 -10   1   40.90    5.30 
   2 -10   1   27.20    4.00 
   2 -10   1   30.60    4.20 
  -3  10  -1   -0.50    1.20 
  -3  10  -1    7.60    2.50 
   3 -10   1    3.80    1.90 
   3 -10   1    3.30    2.30 
   3 -10   1    5.80    2.30 
  -4  10  -1    0.90    1.60 
  -4  10  -1   -0.40    1.50 
   4 -10   1    1.70    1.70 
   4 -10   1    0.00    1.20 
   4 -10   1    1.50    1.60 
   4 -10   1    0.00    2.00 
  -5  10  -1    0.90    1.40 
  -5  10  -1    3.20    2.00 
   5 -10   1    2.40    2.00 
   5 -10   1    2.70    2.10 
   5 -10   1    4.00    1.70 
   5 -10   1    8.00    2.60 
  -6  10  -1    5.30    2.10 
  -6  10  -1    5.20    2.30 
   6 -10   1    7.00    2.40 
   6 -10   1    9.90    2.60 
   6 -10   1    9.90    3.20 
  -7  10  -1    0.10    1.50 
  -7  10  -1    0.50    1.50 
   7 -10   1   -1.20    1.90 
   7 -10   1    0.90    1.70 
   7 -10   1    1.40    1.80 
  -8  10  -1   13.00    3.10 
  -8  10  -1    3.90    2.30 
   8 -10   1    9.90    2.90 
   8 -10   1    9.20    3.40 
   8 -10   1    9.50    2.90 
  -9  10  -1   30.00    5.10 
  -9  10  -1   33.80    4.80 
   9 -10   1   27.10    4.50 
   9 -10   1   31.10    5.10 
   9 -10   1   35.70    5.10 
 -10  10  -1   28.90    4.80 
 -10  10  -1   37.30    5.70 
  10 -10   1   31.30    5.50 
  10 -10   1   32.50    5.00 
  10 -10   1   31.00    4.70 
 -11  10  -1    1.80    2.20 
 -11  10  -1   -2.50    1.60 
  11 -10   1    1.00    2.00 
  11 -10   1    1.30    2.10 
  11 -10   1   -0.90    1.80 
  11 -10   1   -1.00    2.20 
 -12  10  -1   71.19    7.90 
 -12  10  -1   72.59    7.50 
  12 -10   1   66.69    7.40 
  12 -10   1   80.19    8.70 
  12 -10   1   53.09    7.10 
 -13  10  -1    7.40    3.70 
 -13  10  -1    6.80    2.90 
  13 -10   1    8.40    3.40 
  13 -10   1    6.70    3.10 
  13 -10   1    8.60    3.60 
 -14  10  -1   20.40    4.60 
  14 -10   1   13.00    4.10 
  14 -10   1   20.80    4.60 
  14 -10   1   29.90    6.10 
 -13  -9   1   22.60    1.70 
 -12  -9   1    0.30    0.90 
 -11  -9   1    5.00    1.30 
 -10  -9   1    9.70    1.80 
  -9  -9   1    0.60    1.00 
  -8  -9   1   24.60    2.80 
  -8  -9   1   29.40    3.10 
   7   9  -1   36.20    2.20 
  -7  -9   1   37.20    3.50 
  -7  -9   1   33.10    3.40 
   6   9  -1   37.30    2.80 
  -6  -9   1   44.80    3.40 
  -6  -9   1   45.10    3.40 
   5   9  -1   48.60    3.30 
  -5  -9   1   51.99    3.80 
  -5  -9   1   57.59    3.90 
   4   9  -1   25.40    3.00 
  -4  -9   1   28.40    3.40 
  -4  -9   1   26.30    3.30 
   3   9  -1   44.20    3.50 
  -3  -9   1   45.40    4.20 
  -3  -9   1   34.80    3.80 
   2   9  -1   18.90    2.80 
  -2  -9   1   18.10    3.00 
  -2  -9   1   19.00    2.90 
   1   9  -1   12.60    2.00 
   1   9  -1   10.60    2.30 
  -1  -9   1    8.30    2.10 
  -1  -9   1    5.40    1.90 
  -1  -9   1   10.50    2.50 
   0   9  -1   -0.10    0.90 
   0   9  -1   -1.10    1.00 
   0  -9   1    1.60    1.40 
   0  -9   1   -0.40    1.50 
   0  -9   1    0.30    1.10 
  -1   9  -1    0.60    1.10 
  -1   9  -1   -0.40    1.00 
   1  -9   1    1.30    1.50 
   1  -9   1    1.80    1.40 
   1  -9   1    0.50    1.30 
  -2   9  -1   83.99    5.80 
  -2   9  -1  108.99    5.80 
   2  -9   1  101.59    6.20 
   2  -9   1   91.69    4.60 
   2  -9   1   84.59    5.70 
   2  -9   1   95.69    6.40 
  -3   9  -1    1.40    1.70 
  -3   9  -1    2.40    1.60 
   3  -9   1    0.30    1.20 
   3  -9   1    4.20    1.80 
   3  -9   1    2.80    1.90 
   3  -9   1    2.30    1.60 
  -4   9  -1   69.89    5.30 
  -4   9  -1   66.29    4.90 
   4  -9   1   73.89    5.50 
   4  -9   1   63.39    4.90 
   4  -9   1   71.19    4.50 
   4  -9   1   82.99    6.00 
  -5   9  -1    3.60    1.60 
  -5   9  -1   -0.90    1.50 
   5  -9   1   -1.10    1.30 
   5  -9   1    1.20    1.60 
   5  -9   1    2.20    1.40 
   5  -9   1    3.10    2.00 
  -6   9  -1   13.20    2.90 
  -6   9  -1   10.90    2.80 
   6  -9   1   13.30    3.00 
   6  -9   1   18.00    3.70 
   6  -9   1   18.90    3.10 
   6  -9   1   11.00    3.00 
  -7   9  -1    9.20    2.60 
  -7   9  -1    5.20    2.30 
  -7   9  -1    5.40    2.70 
   7  -9   1    4.90    2.40 
   7  -9   1    8.80    2.60 
   7  -9   1    5.80    2.10 
  -8   9  -1   37.40    5.30 
  -8   9  -1   47.10    5.30 
  -8   9  -1   37.00    5.20 
   8  -9   1   44.40    5.00 
   8  -9   1   45.00    5.20 
   8  -9   1   49.70    6.00 
  -9   9  -1    1.30    1.60 
  -9   9  -1    0.00    1.60 
  -9   9  -1    0.70    1.90 
   9  -9   1    2.40    1.80 
   9  -9   1    2.10    1.90 
   9  -9   1   -0.30    1.30 
 -10   9  -1    6.40    2.50 
 -10   9  -1   16.30    4.00 
 -10   9  -1    9.20    3.10 
  10  -9   1   11.60    3.30 
  10  -9   1   13.70    3.80 
  10  -9   1   12.30    2.90 
 -11   9  -1    9.30    3.10 
 -11   9  -1    5.50    2.70 
 -11   9  -1    4.60    2.50 
  11  -9   1   10.30    3.50 
  11  -9   1   12.30    3.10 
  11  -9   1   10.10    3.20 
  11  -9   1   12.90    3.80 
 -12   9  -1    2.80    2.60 
 -12   9  -1    1.90    2.00 
 -12   9  -1    3.20    2.40 
  12  -9   1   -1.40    2.00 
  12  -9   1    1.70    2.30 
  12  -9   1    0.40    2.10 
 -13   9  -1   34.10    5.10 
 -13   9  -1   22.10    4.70 
  13  -9   1   26.90    5.50 
  13  -9   1   22.40    4.60 
  13  -9   1   16.40    4.10 
 -14   9  -1    0.20    2.20 
 -14   9  -1   -0.60    1.80 
  14  -9   1    1.20    2.30 
  14  -9   1   -0.70    1.90 
  14  -9   1   -1.60    1.90 
 -15   9  -1   76.79    8.90 
 -15   9  -1   56.39    7.20 
  15  -9   1   67.99    8.70 
  15  -9   1   65.99    7.80 
  15  -9   1   55.89    7.50 
 -12  -8   1   -1.30    0.50 
 -11  -8   1    4.20    1.10 
 -10  -8   1   24.80    2.40 
  -9  -8   1   25.10    2.50 
  -8  -8   1   13.50    1.90 
  -8  -8   1   11.70    1.80 
   7   8  -1    0.40    0.60 
  -7  -8   1    0.00    0.80 
  -7  -8   1   -0.80    0.80 
   6   8  -1   30.00    2.20 
  -6  -8   1   33.90    2.80 
  -6  -8   1   35.50    2.70 
   5   8  -1   11.40    1.80 
  -5  -8   1    9.70    1.80 
  -5  -8   1   10.40    2.00 
   4   8  -1   69.59    3.90 
  -4  -8   1   63.99    3.90 
  -4  -8   1   66.29    4.10 
   3   8  -1   66.99    4.00 
  -3  -8   1   63.79    4.10 
  -3  -8   1   60.69    4.30 
  -3  -8   1   58.79    3.90 
   2   8  -1  219.38    8.70 
   2   8  -1  217.58    7.40 
  -2  -8   1  221.48    8.60 
  -2  -8   1  222.18    9.00 
  -2  -8   1  223.78    9.10 
   1   8  -1  148.39    6.80 
   1   8  -1  144.49    5.80 
  -1  -8   1  142.89    7.10 
  -1  -8   1  144.39    6.60 
  -1  -8   1  143.49    6.80 
   0   8  -1  255.07    9.30 
   0   8  -1  264.37   10.30 
   0  -8   1  270.17   10.20 
   0  -8   1  272.17    8.30 
   0  -8   1  279.67   10.70 
   0  -8   1  262.97   10.70 
  -1   8  -1   29.40    3.20 
  -1   8  -1   25.60    3.40 
   1  -8   1   23.50    3.10 
   1  -8   1   23.00    3.20 
   1  -8   1   27.40    3.60 
   1  -8   1   27.00    2.50 
  -2   8  -1    8.40    2.00 
  -2   8  -1    6.00    1.80 
  -2   8  -1    5.80    1.90 
   2  -8   1    4.50    1.80 
   2  -8   1    6.90    1.50 
   2  -8   1    9.10    2.10 
   2  -8   1    4.50    1.70 
  -3   8  -1   35.40    4.20 
  -3   8  -1   30.90    3.90 
  -3   8  -1   29.90    3.50 
   3  -8   1   22.70    3.40 
   3  -8   1   23.70    3.70 
   3  -8   1   33.30    4.00 
   3  -8   1   37.20    3.40 
  -4   8  -1    1.30    1.30 
  -4   8  -1   -0.20    1.20 
  -4   8  -1    0.60    1.30 
   4  -8   1    0.20    1.20 
   4  -8   1   -1.40    1.20 
   4  -8   1    0.20    1.30 
   4  -8   1    1.40    1.20 
  -5   8  -1   73.39    5.20 
  -5   8  -1   67.19    5.10 
  -5   8  -1   69.19    4.80 
   5  -8   1   65.79    4.90 
   5  -8   1   75.59    5.40 
   5  -8   1   72.09    4.60 
   5  -8   1   57.29    5.80 
  -6   8  -1   27.90    3.90 
  -6   8  -1   28.10    3.90 
  -6   8  -1   35.70    4.40 
   6  -8   1   33.00    4.30 
   6  -8   1   30.40    4.00 
   6  -8   1   28.50    3.70 
   6  -8   1   24.00    3.90 
  -7   8  -1    0.80    1.30 
  -7   8  -1    3.30    1.90 
  -7   8  -1    2.60    1.80 
   7  -8   1    1.40    1.60 
   7  -8   1    3.90    1.90 
   7  -8   1    0.70    1.50 
  -8   8  -1   14.50    3.10 
  -8   8  -1   12.80    3.00 
  -8   8  -1   15.30    3.00 
   8  -8   1   11.10    2.70 
   8  -8   1   15.60    3.10 
   8  -8   1    9.10    2.90 
  -9   8  -1   10.90    3.20 
  -9   8  -1   11.80    2.80 
  -9   8  -1    9.10    2.70 
   9  -8   1   12.20    2.70 
   9  -8   1    6.70    2.80 
   9  -8   1    5.40    2.20 
 -10   8  -1   22.50    4.20 
 -10   8  -1   24.70    3.90 
 -10   8  -1   27.30    4.40 
  10  -8   1   29.80    4.40 
  10  -8   1   23.20    3.60 
  10  -8   1   19.60    4.10 
 -11   8  -1   31.60    4.90 
 -11   8  -1   46.40    5.60 
 -11   8  -1   38.20    5.40 
  11  -8   1   44.00    6.00 
  11  -8   1   33.60    5.10 
  11  -8   1   41.50    4.80 
  11  -8   1   36.00    5.40 
 -12   8  -1  126.69    8.40 
 -12   8  -1  122.79    7.70 
 -12   8  -1  114.69    8.00 
  12  -8   1  114.09    8.10 
  12  -8   1   86.59    7.70 
  12  -8   1  114.79    8.00 
 -13   8  -1   18.10    4.20 
 -13   8  -1   10.70    3.10 
  13  -8   1    6.40    2.60 
  13  -8   1    8.90    3.10 
  13  -8   1   11.50    3.70 
 -14   8  -1   39.80    5.70 
 -14   8  -1   41.90    5.90 
  14  -8   1   34.50    5.60 
  14  -8   1   41.80    6.00 
  14  -8   1   42.20    6.40 
 -15   8  -1    0.80    2.20 
 -15   8  -1    7.20    3.30 
  15  -8   1    4.40    2.80 
  15  -8   1   -0.40    2.20 
  15  -8   1    3.70    2.50 
 -16   8  -1   17.00    4.10 
 -16   8  -1   11.10    3.90 
  16  -8   1   20.50    5.10 
  16  -8   1   10.80    3.40 
  16  -8   1   12.50    3.90 
 -12  -7   1   34.80    1.60 
 -11  -7   1   23.80    1.60 
 -11  -7   1   23.30    1.60 
 -10  -7   1   -0.30    0.70 
 -10  -7   1    0.10    0.60 
  -9  -7   1    1.40    0.70 
  -9  -7   1    1.70    0.80 
  -8  -7   1  103.29    4.00 
  -8  -7   1   99.49    4.30 
  -8  -7   1  102.09    4.40 
  -7  -7   1   34.30    2.20 
  -7  -7   1   29.10    2.30 
  -7  -7   1   33.30    2.40 
   6   7  -1   84.09    3.40 
  -6  -7   1   89.09    4.00 
  -6  -7   1   87.79    4.20 
  -6  -7   1   86.99    4.20 
   5   7  -1   10.20    1.50 
  -5  -7   1    9.40    1.70 
  -5  -7   1    8.60    1.60 
  -5  -7   1    5.50    1.30 
   4   7  -1   74.29    3.70 
  -4  -7   1   70.39    3.70 
  -4  -7   1   74.09    4.20 
  -4  -7   1   78.99    4.10 
  -4  -7   1   68.19    3.90 
   3   7  -1   45.90    3.00 
   3   7  -1   43.40    1.90 
  -3  -7   1   45.60    3.00 
  -3  -7   1   49.30    3.40 
  -3  -7   1   41.80    3.00 
  -3  -7   1   42.90    3.10 
   2   7  -1   11.80    1.50 
   2   7  -1   11.80    2.10 
  -2  -7   1   12.80    2.00 
  -2  -7   1   15.20    2.30 
  -2  -7   1   13.20    2.20 
  -2  -7   1   11.10    1.90 
   1   7  -1   64.89    3.40 
   1   7  -1   64.29    4.00 
   1   7  -1   67.59    4.00 
  -1  -7   1   69.39    4.30 
  -1  -7   1   62.69    4.00 
  -1  -7   1   66.89    4.00 
  -1  -7   1   64.39    4.10 
   0   7  -1   -0.20    0.70 
   0   7  -1    0.20    1.00 
   0   7  -1    0.50    0.90 
   0  -7   1   -0.30    0.90 
   0  -7   1    1.40    1.00 
   0  -7   1    0.10    1.20 
   0  -7   1    0.80    0.70 
  -1   7  -1   39.00    3.80 
  -1   7  -1   40.70    3.00 
  -1   7  -1   41.70    4.00 
   1  -7   1   36.50    2.40 
   1  -7   1   42.40    4.00 
   1  -7   1   39.60    4.20 
   1  -7   1   30.80    3.40 
  -2   7  -1   43.80    3.30 
  -2   7  -1   40.70    4.00 
  -2   7  -1   42.80    4.20 
   2  -7   1   35.70    4.00 
   2  -7   1   45.80    3.60 
   2  -7   1   44.50    4.20 
   2  -7   1   40.80    2.80 
  -3   7  -1   28.80    3.50 
  -3   7  -1   36.40    4.10 
  -3   7  -1   37.10    3.60 
   3  -7   1   39.80    4.20 
   3  -7   1   34.10    3.70 
   3  -7   1   37.70    3.40 
   3  -7   1   29.70    3.90 
  -4   7  -1   14.50    2.60 
  -4   7  -1   12.90    2.40 
  -4   7  -1    9.50    2.10 
   4  -7   1   15.30    2.70 
   4  -7   1   13.20    2.40 
   4  -7   1   20.30    3.10 
   4  -7   1   12.60    2.20 
  -5   7  -1   13.70    2.80 
  -5   7  -1   14.50    2.80 
  -5   7  -1   15.30    2.60 
   5  -7   1   11.60    2.30 
   5  -7   1   16.30    2.80 
   5  -7   1   11.50    2.40 
   5  -7   1   16.10    3.00 
  -6   7  -1  101.09    5.70 
  -6   7  -1   96.49    6.00 
  -6   7  -1  102.19    6.00 
   6  -7   1   95.29    5.50 
   6  -7   1   83.89    5.80 
   6  -7   1   95.09    5.90 
   6  -7   1  103.89    5.70 
  -7   7  -1    0.10    1.10 
  -7   7  -1    0.50    1.20 
  -7   7  -1   -1.00    1.10 
   7  -7   1   -1.70    1.00 
   7  -7   1    1.40    1.40 
   7  -7   1    1.40    1.60 
   7  -7   1    1.80    1.60 
  -8   7  -1   37.90    4.70 
  -8   7  -1   42.00    4.70 
  -8   7  -1   30.80    4.20 
   8  -7   1   37.20    4.90 
   8  -7   1   45.90    4.70 
   8  -7   1   43.20    4.80 
  -9   7  -1   11.20    2.90 
  -9   7  -1    9.60    2.40 
  -9   7  -1    8.30    2.50 
   9  -7   1    9.60    2.70 
   9  -7   1    5.80    2.20 
   9  -7   1   10.40    2.40 
 -10   7  -1    4.90    2.00 
 -10   7  -1    9.40    2.80 
 -10   7  -1    8.90    2.60 
  10  -7   1    7.20    2.40 
  10  -7   1    8.90    2.70 
  10  -7   1    4.10    2.30 
  10  -7   1    6.00    2.00 
 -11   7  -1   -0.30    1.50 
 -11   7  -1    0.90    1.60 
 -11   7  -1   -1.80    1.60 
  11  -7   1   -1.00    1.30 
  11  -7   1    0.20    1.80 
  11  -7   1   -2.00    1.50 
  11  -7   1   -2.20    1.50 
 -12   7  -1    0.30    1.60 
 -12   7  -1   -0.80    1.70 
 -12   7  -1    0.10    1.60 
  12  -7   1    0.40    1.60 
  12  -7   1    1.70    2.10 
  12  -7   1   -0.50    1.90 
 -13   7  -1   17.50    4.00 
 -13   7  -1   13.60    3.30 
  13  -7   1   14.00    3.70 
  13  -7   1   20.40    4.10 
  13  -7   1   18.60    4.30 
 -14   7  -1   11.20    3.20 
 -14   7  -1   15.10    3.60 
  14  -7   1   15.90    3.90 
  14  -7   1   13.30    3.80 
  14  -7   1   11.10    3.80 
 -15   7  -1    7.50    2.90 
 -15   7  -1    7.20    2.70 
  15  -7   1    9.00    3.00 
  15  -7   1   14.20    3.90 
  15  -7   1   14.10    4.10 
 -16   7  -1    5.70    3.00 
 -16   7  -1    1.00    2.20 
  16  -7   1    1.30    2.10 
  16  -7   1   -1.40    2.30 
  16  -7   1    2.10    2.60 
 -17   7  -1   43.90    6.20 
 -17   7  -1   51.49    6.90 
  17  -7   1   35.60    6.20 
  17  -7   1   51.69    7.80 
  17  -7   1   62.29    7.10 
  18   6  -1    2.50    2.70 
  17   6  -1   38.30    6.30 
  16   6  -1   17.40    4.60 
  15   6  -1    2.70    2.50 
  14   6  -1    7.20    2.90 
 -11  -6   1   10.90    0.90 
 -11  -6   1   11.80    1.00 
 -10  -6   1    1.70    0.60 
 -10  -6   1    2.30    0.60 
  -9  -6   1    1.60    0.60 
  -9  -6   1    2.30    0.70 
  -8  -6   1   41.10    1.80 
  -8  -6   1   39.20    2.20 
  -8  -6   1   37.10    2.10 
  -7  -6   1   69.79    3.20 
  -7  -6   1   68.19    3.20 
  -7  -6   1   70.59    2.80 
   6   6  -1   71.39    2.60 
   6   6  -1   67.69    2.50 
  -6  -6   1   64.29    3.20 
  -6  -6   1   71.29    3.00 
  -6  -6   1   74.09    3.40 
   5   6  -1   45.70    2.40 
  -5  -6   1   51.59    2.90 
  -5  -6   1   47.10    2.70 
  -5  -6   1   47.80    2.60 
   4   6  -1    5.80    1.20 
  -4  -6   1    4.90    1.20 
  -4  -6   1    5.60    1.20 
  -4  -6   1    7.80    1.30 
   3   6  -1    5.00    1.20 
  -3  -6   1    3.80    1.20 
  -3  -6   1    4.90    1.30 
  -3  -6   1    7.80    1.50 
  -3  -6   1    6.40    1.30 
  -3  -6   1    5.80    1.30 
   2   6  -1   96.19    3.70 
   2   6  -1   97.49    4.50 
  -2  -6   1  100.19    4.70 
  -2  -6   1   84.89    4.40 
  -2  -6   1  103.49    4.80 
  -2  -6   1   90.99    4.30 
  -2  -6   1   94.29    4.60 
   1   6  -1   17.70    2.20 
   1   6  -1   20.20    2.00 
   1   6  -1   22.20    2.50 
  -1  -6   1   18.20    2.20 
  -1  -6   1   16.20    2.20 
  -1  -6   1   20.10    2.40 
  -1  -6   1   17.80    2.30 
  -1  -6   1   17.40    2.30 
   0   6  -1    1.40    0.90 
   0   6  -1    1.60    1.10 
   0   6  -1    2.30    1.20 
   0  -6   1    3.00    1.20 
   0  -6   1    1.60    0.70 
   0  -6   1    2.70    1.10 
   0  -6   1    3.70    1.30 
  -1   6  -1    5.00    1.40 
  -1   6  -1    1.90    1.20 
  -1   6  -1    3.80    1.20 
   1  -6   1    4.80    1.70 
   1  -6   1    4.00    1.30 
   1  -6   1    3.00    0.90 
   1  -6   1    2.50    1.30 
  -2   6  -1   81.49    4.60 
  -2   6  -1   69.89    4.30 
  -2   6  -1   79.29    4.20 
   2  -6   1   81.89    4.60 
   2  -6   1   85.79    4.50 
   2  -6   1   69.29    4.50 
   2  -6   1   72.09    3.70 
  -3   6  -1  279.47    9.60 
  -3   6  -1  280.17   10.20 
  -3   6  -1  260.67   10.10 
   3  -6   1  262.37    9.70 
   3  -6   1  268.17    9.20 
   3  -6   1  263.07   10.20 
   3  -6   1  254.77   10.00 
  -4   6  -1   -0.80    0.80 
  -4   6  -1    3.70    1.40 
  -4   6  -1    5.10    1.70 
   4  -6   1    1.70    1.40 
   4  -6   1    0.90    1.20 
   4  -6   1    7.00    1.80 
   4  -6   1    3.10    1.30 
  -5   6  -1   31.30    3.70 
  -5   6  -1   41.00    4.10 
  -5   6  -1   40.50    3.80 
   5  -6   1   44.90    4.10 
   5  -6   1   43.80    3.40 
   5  -6   1   41.10    4.20 
   5  -6   1   38.10    4.00 
  -6   6  -1   20.00    3.10 
  -6   6  -1   13.40    2.50 
  -6   6  -1   14.00    2.40 
   6  -6   1   17.40    2.80 
   6  -6   1   18.90    2.90 
   6  -6   1   16.70    2.70 
   6  -6   1   16.10    2.60 
  -7   6  -1    8.60    2.20 
  -7   6  -1    9.50    2.20 
  -7   6  -1    8.00    1.90 
   7  -6   1    8.80    2.20 
   7  -6   1    4.30    1.70 
   7  -6   1    8.90    2.20 
   7  -6   1    9.30    2.10 
  -8   6  -1    0.40    1.40 
  -8   6  -1    0.30    1.10 
  -8   6  -1    1.10    1.20 
   8  -6   1    0.40    1.10 
   8  -6   1    0.90    1.40 
   8  -6   1    0.90    1.40 
  -9   6  -1   39.90    4.60 
  -9   6  -1   44.40    4.60 
  -9   6  -1   39.50    4.70 
   9  -6   1   54.89    4.00 
   9  -6   1   36.60    4.50 
   9  -6   1   39.90    4.60 
   9  -6   1   39.30    4.90 
 -10   6  -1    1.80    1.40 
 -10   6  -1    5.00    2.30 
 -10   6  -1    4.50    1.80 
  10  -6   1    2.90    1.50 
  10  -6   1   -1.10    1.60 
  10  -6   1    0.80    1.50 
  10  -6   1    0.00    1.60 
 -11   6  -1   35.80    4.70 
 -11   6  -1   39.20    4.70 
 -11   6  -1   40.90    5.00 
  11  -6   1   32.40    4.40 
  11  -6   1   30.10    4.70 
  11  -6   1   43.60    5.30 
 -12   6  -1   84.49    5.90 
 -12   6  -1   70.09    5.80 
  12  -6   1   91.39    7.20 
  12  -6   1   66.69    6.90 
  12  -6   1   89.89    6.20 
 -13   6  -1   42.10    5.10 
 -13   6  -1   45.70    5.60 
  13  -6   1   37.20    5.50 
  13  -6   1   42.00    5.20 
  13  -6   1   45.70    6.10 
 -14   6  -1   19.90    3.80 
 -14   6  -1    9.80    2.80 
  14  -6   1   11.70    3.30 
  14  -6   1   10.20    3.00 
  14  -6   1   16.10    3.90 
 -15   6  -1   26.30    4.50 
 -15   6  -1   27.50    4.50 
  15  -6   1   31.00    4.70 
  15  -6   1   27.90    5.30 
  15  -6   1   35.80    6.00 
 -16   6  -1   -0.20    1.80 
 -16   6  -1   -0.50    1.80 
  16  -6   1    2.60    2.60 
  16  -6   1   -0.40    2.10 
  16  -6   1    0.20    1.70 
 -17   6  -1   -0.50    1.90 
 -17   6  -1    0.40    2.30 
  17  -6   1   -1.60    2.00 
  17  -6   1    0.60    1.90 
  17  -6   1   -1.50    2.20 
 -18   6  -1   13.30    3.80 
 -18   6  -1    3.20    2.80 
  18  -6   1    1.50    3.20 
  18  -6   1    6.90    2.90 
  18  -6   1   11.40    4.40 
  18   5  -1   13.50    4.30 
  17   5  -1    5.90    3.60 
  16   5  -1   13.30    4.10 
  15   5  -1   44.70    6.50 
  14   5  -1    8.50    3.10 
  13   5  -1   13.70    3.50 
  12   5  -1   -1.00    1.50 
  11   5  -1  136.29    6.10 
  11   5  -1  128.19    8.10 
  10   5  -1  380.56   11.90 
  10   5  -1  349.96   14.90 
   9   5  -1  120.59    7.20 
   9   5  -1  121.59    5.00 
  -9  -5   1  125.79    3.80 
  -9  -5   1  118.09    3.80 
   8   5  -1    8.50    1.40 
  -8  -5   1    8.40    0.90 
  -8  -5   1    8.60    0.90 
   7   5  -1    3.30    0.90 
  -7  -5   1    1.70    0.60 
  -7  -5   1    0.80    0.50 
   6   5  -1  160.68    5.00 
  -6  -5   1  154.98    5.30 
  -6  -5   1  165.58    5.40 
  -6  -5   1  164.48    4.70 
  -6  -5   1  162.68    4.70 
   5   5  -1   48.60    2.10 
  -5  -5   1   48.70    2.40 
  -5  -5   1   50.29    2.20 
  -5  -5   1   49.20    2.50 
   4   5  -1   66.99    2.90 
  -4  -5   1   71.29    2.90 
  -4  -5   1   68.19    3.20 
  -4  -5   1   68.39    3.10 
   3   5  -1    9.90    1.40 
  -3  -5   1    6.50    1.20 
  -3  -5   1    6.30    1.10 
  -3  -5   1    8.60    1.40 
   2   5  -1  363.06   10.10 
   2   5  -1  354.06   11.00 
  -2  -5   1  372.36   11.30 
  -2  -5   1  372.06   11.40 
  -2  -5   1  363.46   10.80 
  -2  -5   1  346.97   11.20 
  -2  -5   1  373.36   11.30 
   1   5  -1  205.18    7.30 
   1   5  -1  203.98    6.70 
   1   5  -1  197.88    7.20 
  -1  -5   1  207.18    7.10 
  -1  -5   1  203.08    7.40 
  -1  -5   1  204.28    7.30 
  -1  -5   1  208.78    7.40 
  -1  -5   1  213.78    7.50 
   0   5  -1    4.30    1.20 
   0   5  -1    4.90    1.30 
   0   5  -1    6.40    1.30 
   0  -5   1    6.20    1.50 
   0  -5   1    4.20    1.30 
   0  -5   1    6.40    0.90 
   0  -5   1    5.50    1.30 
   0  -5   1    6.80    1.50 
  -1   5  -1  140.79    5.60 
  -1   5  -1  147.39    6.10 
  -1   5  -1  149.19    6.10 
   1  -5   1  144.09    6.00 
   1  -5   1  142.59    5.10 
   1  -5   1  152.08    5.90 
   1  -5   1  151.38    6.30 
  -2   5  -1    2.20    1.10 
  -2   5  -1    0.80    0.90 
  -2   5  -1    0.30    0.80 
   2  -5   1   -0.10    0.70 
   2  -5   1    0.10    1.00 
   2  -5   1    1.40    1.00 
   2  -5   1    2.40    1.10 
  -3   5  -1  281.17    9.90 
  -3   5  -1  260.37    9.70 
  -3   5  -1  262.57    9.30 
   3  -5   1  288.67   10.10 
   3  -5   1  269.07    9.80 
   3  -5   1  275.47    9.20 
   3  -5   1  278.87    9.50 
  -4   5  -1  434.16   14.60 
  -4   5  -1  464.95   14.30 
  -4   5  -1  469.55   15.00 
   4  -5   1  456.75   15.00 
   4  -5   1  456.45   14.20 
   4  -5   1  434.66   14.70 
   4  -5   1  466.85   14.30 
  -5   5  -1   26.70    3.00 
  -5   5  -1   27.40    3.00 
  -5   5  -1   35.80    3.60 
   5  -5   1   28.20    3.10 
   5  -5   1   29.00    3.30 
   5  -5   1   35.70    3.60 
   5  -5   1   28.70    3.10 
  -6   5  -1  112.19    5.50 
  -6   5  -1  105.79    5.70 
  -6   5  -1  103.19    5.70 
   6  -5   1  116.09    6.00 
   6  -5   1  120.69    5.90 
   6  -5   1  102.09    5.60 
   6  -5   1  105.69    5.30 
  -7   5  -1   29.80    3.50 
  -7   5  -1   26.40    3.40 
  -7   5  -1   25.80    3.10 
   7  -5   1   29.00    3.10 
   7  -5   1   37.20    3.90 
   7  -5   1   22.50    3.10 
   7  -5   1   29.10    3.60 
  -8   5  -1   28.00    3.60 
  -8   5  -1   25.40    3.20 
  -8   5  -1   31.50    3.80 
   8  -5   1   24.80    3.40 
   8  -5   1   26.70    3.60 
   8  -5   1   25.90    3.30 
   8  -5   1   27.60    3.20 
  -9   5  -1    1.00    1.20 
  -9   5  -1    3.20    1.60 
  -9   5  -1    2.00    1.40 
   9  -5   1    4.00    1.90 
   9  -5   1   -1.20    1.00 
   9  -5   1    1.40    1.20 
   9  -5   1   -1.10    1.00 
 -10   5  -1   13.60    2.50 
 -10   5  -1   15.30    2.90 
 -10   5  -1   12.50    2.60 
  10  -5   1   10.10    2.40 
  10  -5   1    7.20    2.50 
  10  -5   1    9.10    2.60 
  10  -5   1   11.70    2.20 
 -11   5  -1    0.30    1.50 
 -11   5  -1    2.70    1.90 
 -11   5  -1    4.70    1.90 
  11  -5   1    2.60    1.90 
  11  -5   1    0.70    1.80 
  11  -5   1    5.00    2.10 
 -12   5  -1   97.39    6.50 
 -12   5  -1   96.79    6.00 
  12  -5   1   90.19    6.10 
  12  -5   1  105.09    7.40 
  12  -5   1  101.39    6.90 
 -13   5  -1   30.60    4.10 
 -13   5  -1   30.40    4.40 
  13  -5   1   41.20    4.90 
  13  -5   1   38.00    5.50 
  13  -5   1   32.50    4.90 
 -14   5  -1   22.10    3.70 
 -14   5  -1   17.10    3.60 
  14  -5   1   21.70    4.50 
  14  -5   1   21.90    3.80 
  14  -5   1   18.60    4.10 
 -15   5  -1   21.00    3.70 
 -15   5  -1   23.70    4.10 
  15  -5   1   25.50    5.00 
  15  -5   1   30.40    4.40 
  15  -5   1   11.80    3.60 
 -16   5  -1    7.40    2.70 
 -16   5  -1    3.40    2.10 
  16  -5   1    2.30    2.20 
  16  -5   1    0.80    2.00 
  16  -5   1    5.40    2.30 
 -17   5  -1   23.10    4.20 
 -17   5  -1   13.70    3.60 
  17  -5   1    9.30    3.70 
  17  -5   1   14.80    3.40 
  17  -5   1    5.70    3.10 
 -18   5  -1   -0.20    2.10 
 -18   5  -1    4.00    2.40 
  18  -5   1    0.90    2.50 
  18  -5   1    3.90    2.30 
  18  -5   1    1.50    2.90 
  19   4  -1    0.60    3.30 
  18   4  -1    1.70    2.50 
  17   4  -1   -0.50    1.80 
  16   4  -1    1.20    2.30 
  15   4  -1   14.50    3.90 
 -15  -4   1   15.00    1.20 
  14   4  -1    0.70    2.00 
  14   4  -1    0.40    1.30 
 -14  -4   1    1.10    0.50 
 -14  -4   1    0.90    0.50 
  13   4  -1   18.40    3.10 
  13   4  -1   16.50    3.70 
 -13  -4   1   18.00    1.00 
  12   4  -1   37.90    5.10 
  12   4  -1   37.90    4.00 
  11   4  -1    4.00    2.10 
  11   4  -1    4.40    1.50 
  10   4  -1  105.59    6.80 
  10   4  -1  111.99    5.30 
   9   4  -1    1.40    1.60 
   9   4  -1    2.70    1.20 
   8   4  -1   29.60    2.20 
   8   4  -1   29.20    3.70 
   7   4  -1   93.39    5.60 
   7   4  -1  107.29    4.20 
  -7  -4   1  106.99    3.20 
  -7  -4   1   96.99    3.10 
   6   4  -1  994.70   26.30 
  -6  -4   1  998.60   26.20 
  -6  -4   1 1007.00   26.20 
   5   4  -1   12.70    1.20 
  -5  -4   1   13.50    1.10 
  -5  -4   1   11.60    1.10 
   4   4  -1  347.47    9.50 
  -4  -4   1  334.57    9.90 
  -4  -4   1  350.06   10.00 
  -4  -4   1  346.57    9.30 
  -4  -4   1  355.76    9.30 
   3   4  -1  237.98    7.10 
  -3  -4   1  237.48    6.90 
  -3  -4   1  232.38    7.30 
  -3  -4   1  232.68    7.30 
   2   4  -1  431.06   11.40 
   2   4  -1  451.35   12.40 
  -2  -4   1  424.56   12.50 
  -2  -4   1  421.66   12.00 
  -2  -4   1  430.66   12.60 
   1   4  -1   11.90    1.60 
   1   4  -1   10.10    1.40 
   1   4  -1   11.00    1.20 
  -1  -4   1    9.80    1.40 
  -1  -4   1   10.40    1.40 
  -1  -4   1   13.80    1.70 
  -1  -4   1   12.90    1.70 
  -1  -4   1   10.50    1.50 
   0   4  -1   16.90    1.90 
   0   4  -1   16.90    1.80 
   0   4  -1   21.60    2.10 
   0  -4   1   19.50    2.00 
   0  -4   1   20.50    2.00 
   0  -4   1   15.20    1.20 
   0  -4   1   19.30    2.10 
   0  -4   1   16.70    1.90 
   0  -4   1   19.20    2.10 
  -1   4  -1    4.70    1.10 
  -1   4  -1    4.90    1.20 
  -1   4  -1    5.10    1.20 
   1  -4   1    7.00    1.10 
   1  -4   1    3.50    1.10 
   1  -4   1    5.00    1.40 
   1  -4   1    5.70    1.30 
  -2   4  -1   60.09    3.30 
  -2   4  -1   52.99    2.90 
  -2   4  -1   53.79    3.20 
   2  -4   1   56.49    2.90 
   2  -4   1   62.79    3.50 
   2  -4   1   50.29    3.10 
   2  -4   1   53.59    3.10 
  -3   4  -1   97.89    4.30 
  -3   4  -1   87.49    4.40 
  -3   4  -1   85.99    4.30 
   3  -4   1   89.19    4.10 
   3  -4   1   97.89    4.50 
   3  -4   1   89.79    4.20 
   3  -4   1   86.19    4.50 
  -4   4  -1  136.49    5.80 
  -4   4  -1  126.19    5.40 
  -4   4  -1  125.99    5.60 
   4  -4   1  129.39    5.80 
   4  -4   1  123.79    5.40 
   4  -4   1  133.79    5.50 
   4  -4   1  139.39    5.80 
  -5   4  -1  261.87    9.50 
  -5   4  -1  256.97    9.30 
  -5   4  -1  255.87    8.90 
   5  -4   1  256.07    9.40 
   5  -4   1  266.37    9.30 
   5  -4   1  258.97    8.90 
   5  -4   1  247.98    9.40 
  -6   4  -1  219.88    8.40 
  -6   4  -1  221.08    8.50 
   6  -4   1  219.28    7.90 
   6  -4   1  205.38    8.40 
   6  -4   1  207.68    8.30 
   6  -4   1  213.18    8.50 
  -7   4  -1    2.40    1.30 
  -7   4  -1    3.20    1.30 
  -7   4  -1    4.40    1.50 
   7  -4   1    6.60    1.80 
   7  -4   1    7.80    1.60 
   7  -4   1    3.70    1.40 
   7  -4   1    7.10    1.90 
  -8   4  -1   10.50    2.20 
  -8   4  -1   11.30    2.10 
  -8   4  -1   11.70    2.20 
   8  -4   1   12.00    2.30 
   8  -4   1   11.60    2.30 
   8  -4   1    9.40    2.30 
   8  -4   1   11.00    2.00 
   8  -4   1   10.80    2.10 
  -9   4  -1   71.79    4.60 
  -9   4  -1   81.09    4.90 
  -9   4  -1   72.89    4.40 
   9  -4   1   73.99    4.70 
   9  -4   1   72.09    5.40 
   9  -4   1   64.99    4.80 
   9  -4   1   61.39    3.70 
 -10   4  -1   55.89    4.30 
 -10   4  -1   46.70    3.80 
 -10   4  -1   50.29    4.10 
  10  -4   1   56.89    5.50 
  10  -4   1   51.19    3.30 
  10  -4   1   57.49    4.90 
  10  -4   1   51.59    4.10 
 -11   4  -1   63.89    4.50 
 -11   4  -1   66.99    4.80 
 -11   4  -1   65.29    4.70 
  11  -4   1   56.79    4.50 
  11  -4   1   68.39    5.40 
  11  -4   1   71.49    7.10 
 -12   4  -1    4.00    1.80 
 -12   4  -1    5.70    1.90 
  12  -4   1    5.50    2.30 
  12  -4   1    7.00    2.20 
  12  -4   1    5.20    2.30 
 -13   4  -1   17.70    3.20 
 -13   4  -1   21.80    3.40 
  13  -4   1   25.10    4.40 
  13  -4   1   21.70    3.50 
  13  -4   1   20.20    3.90 
 -14   4  -1   19.70    3.60 
 -14   4  -1   16.10    3.10 
  14  -4   1   21.00    4.00 
  14  -4   1   16.90    4.00 
  14  -4   1   25.20    3.60 
 -15   4  -1   12.10    2.90 
 -15   4  -1   11.50    2.80 
  15  -4   1   13.80    2.90 
  15  -4   1    8.40    3.00 
  15  -4   1    2.50    2.30 
 -16   4  -1    0.70    1.70 
 -16   4  -1    0.10    1.70 
  16  -4   1   -0.50    2.00 
  16  -4   1    2.70    2.70 
  16  -4   1    0.60    1.70 
 -17   4  -1    4.10    2.30 
 -17   4  -1    6.60    2.70 
  17  -4   1    0.50    2.50 
  17  -4   1    5.20    3.40 
  17  -4   1    4.30    2.00 
 -18   4  -1    8.10    3.00 
 -18   4  -1    9.00    3.00 
  18  -4   1    1.80    2.20 
  18  -4   1    6.70    3.10 
  18  -4   1   10.00    3.80 
 -19   4  -1   24.20    4.50 
 -19   4  -1   26.70    4.70 
  19  -4   1   17.60    4.90 
  19  -4   1   18.60    4.70 
  19   3  -1    0.30    2.80 
 -19  -3   1   -0.10    1.00 
  18   3  -1   76.69    8.90 
 -18  -3   1   60.99    3.40 
  17   3  -1    5.60    3.20 
  17   3  -1   14.20    3.50 
 -17  -3   1    9.60    1.60 
  16   3  -1   48.30    5.60 
  16   3  -1   48.80    6.90 
 -16  -3   1   49.60    2.90 
  15   3  -1   59.39    7.50 
  15   3  -1   54.79    5.60 
 -15  -3   1   53.49    2.90 
  14   3  -1   -0.20    1.40 
  14   3  -1   -0.60    1.80 
 -14  -3   1    0.90    0.70 
 -14  -3   1    0.60    0.70 
  13   3  -1   27.30    3.90 
  13   3  -1   30.60    4.80 
 -13  -3   1   30.80    1.80 
 -13  -3   1   26.40    1.80 
  12   3  -1  231.48    9.70 
  12   3  -1  241.48   11.60 
 -12  -3   1  249.78    7.20 
 -12  -3   1  229.08    7.20 
  11   3  -1    9.80    2.80 
  11   3  -1    4.10    1.60 
 -11  -3   1    5.40    0.80 
 -11  -3   1    5.70    0.80 
  10   3  -1    0.20    1.50 
  10   3  -1    2.50    1.30 
 -10  -3   1    1.90    0.50 
 -10  -3   1    1.20    0.40 
   9   3  -1   13.30    2.00 
   9   3  -1   11.80    2.60 
  -9  -3   1   13.00    0.70 
   8   3  -1  173.68    6.50 
   8   3  -1  160.38    7.80 
   7   3  -1   91.29    5.40 
   7   3  -1   98.29    4.20 
   6   3  -1  127.39    4.70 
   6   3  -1  122.09    6.00 
   5   3  -1   26.50    1.60 
   5   3  -1   22.70    2.70 
  -5  -3   1   24.70    1.00 
  -5  -3   1   26.30    1.10 
   4   3  -1  617.74   16.10 
  -4  -3   1  625.64   16.20 
  -4  -3   1  595.44   16.20 
   3   3  -1   15.70    1.00 
  -3  -3   1   17.00    0.80 
  -3  -3   1   14.00    1.10 
  -3  -3   1   15.50    1.10 
  -3  -3   1   16.20    0.80 
   2   3  -1   32.70    1.70 
  -2  -3   1   33.40    1.60 
  -2  -3   1   31.70    1.70 
  -2  -3   1   32.10    1.70 
   1   3  -1    9.30    1.20 
   1   3  -1    7.70    1.10 
   1   3  -1    9.00    1.00 
  -1  -3   1   10.10    1.20 
  -1  -3   1   10.20    1.20 
  -1  -3   1    8.90    1.10 
   0   3  -1   88.29    3.60 
   0   3  -1   85.09    3.30 
   0   3  -1   90.69    3.60 
   0  -3   1   89.19    3.60 
   0  -3   1   85.59    2.90 
   0  -3   1   86.69    3.40 
   0  -3   1   84.19    3.50 
   0  -3   1   88.59    3.70 
  -1   3  -1  193.38    6.60 
  -1   3  -1  201.88    6.50 
  -1   3  -1  199.58    6.80 
   1  -3   1  206.68    6.80 
   1  -3   1  194.78    6.70 
   1  -3   1  209.38    6.60 
   1  -3   1  196.88    6.10 
  -2   3  -1    1.80    1.00 
  -2   3  -1    2.40    0.90 
  -2   3  -1    1.20    0.90 
   2  -3   1    2.80    0.90 
   2  -3   1    2.50    0.90 
   2  -3   1    3.90    1.00 
   2  -3   1    2.10    1.00 
  -3   3  -1  408.86   12.20 
  -3   3  -1  403.66   12.30 
  -3   3  -1  410.66   11.90 
   3  -3   1  404.26   11.90 
   3  -3   1  381.16   12.20 
   3  -3   1  404.46   11.80 
   3  -3   1  389.86   12.20 
  -4   3  -1  371.16   11.60 
  -4   3  -1  379.66   12.10 
  -4   3  -1  395.46   12.00 
   4  -3   1  412.06   12.20 
   4  -3   1  368.56   11.50 
   4  -3   1  375.06   12.00 
   4  -3   1  397.56   12.00 
  -5   3  -1   43.20    3.00 
  -5   3  -1   47.00    3.00 
  -5   3  -1   48.10    2.90 
   5  -3   1   44.70    3.10 
   5  -3   1   46.70    2.80 
   5  -3   1   46.40    3.00 
   5  -3   1   45.70    3.10 
  -6   3  -1  306.27    9.90 
  -6   3  -1  301.57   10.30 
  -6   3  -1  287.17   10.30 
   6  -3   1  299.57    9.70 
   6  -3   1  299.47   10.30 
   6  -3   1  335.47   10.60 
   6  -3   1  304.97   10.60 
  -7   3  -1   43.10    2.90 
  -7   3  -1   44.00    3.10 
  -7   3  -1   39.00    3.00 
   7  -3   1   37.40    3.70 
   7  -3   1   37.60    3.50 
   7  -3   1   39.40    4.10 
   7  -3   1   37.90    2.60 
   7  -3   1   36.20    2.80 
  -8   3  -1   83.79    4.30 
  -8   3  -1   83.39    4.70 
  -8   3  -1   90.39    4.80 
  -8   3  -1   82.89    4.60 
   8  -3   1   97.19    5.00 
   8  -3   1   92.79    4.60 
   8  -3   1   92.99    5.30 
   8  -3   1   89.49    5.50 
   8  -3   1   85.49    4.00 
  -9   3  -1   13.40    2.40 
  -9   3  -1   14.30    2.40 
  -9   3  -1   14.40    2.20 
   9  -3   1   12.10    2.70 
   9  -3   1   14.60    2.30 
   9  -3   1   16.80    2.90 
   9  -3   1   17.60    2.10 
 -10   3  -1   11.40    2.30 
 -10   3  -1   10.70    2.20 
 -10   3  -1    8.40    1.80 
  10  -3   1    8.80    2.00 
  10  -3   1   10.20    2.60 
  10  -3   1   17.20    3.10 
  10  -3   1   18.20    2.00 
 -11   3  -1   28.10    3.30 
 -11   3  -1   33.50    3.80 
  11  -3   1   24.10    4.00 
  11  -3   1   27.10    4.00 
  11  -3   1   32.40    3.60 
 -12   3  -1  118.89    6.20 
 -12   3  -1  124.99    6.70 
  12  -3   1  121.69    6.30 
  12  -3   1  138.49    8.20 
  12  -3   1  127.59    7.60 
 -13   3  -1    3.60    1.60 
 -13   3  -1    1.70    1.30 
  13  -3   1    1.00    1.80 
  13  -3   1    0.70    1.40 
  13  -3   1    4.30    2.10 
 -14   3  -1   11.60    2.60 
 -14   3  -1   16.60    3.10 
  14  -3   1   10.90    3.30 
  14  -3   1   15.50    2.80 
  14  -3   1   15.50    3.50 
 -15   3  -1   64.09    5.20 
 -15   3  -1   70.69    5.10 
  15  -3   1   69.49    7.70 
  15  -3   1   64.29    4.60 
  15  -3   1   57.69    6.60 
 -16   3  -1   31.00    4.30 
 -16   3  -1   36.70    4.50 
  16  -3   1   26.20    5.00 
  16  -3   1   37.80    5.70 
  16  -3   1   41.20    4.40 
 -17   3  -1   35.10    4.70 
 -17   3  -1   32.70    4.50 
  17  -3   1   29.50    5.20 
  17  -3   1   41.50    6.50 
  17  -3   1   30.40    3.90 
 -18   3  -1   52.09    5.90 
 -18   3  -1   60.19    6.30 
  18  -3   1   52.59    7.00 
  18  -3   1   54.69    7.60 
 -19   3  -1   26.90    4.60 
 -19   3  -1   32.50    4.90 
  19  -3   1   24.20    5.30 
  19  -3   1   28.30    5.90 
  19   2  -1    1.50    3.10 
  19   2  -1   -1.50    2.20 
 -19  -2   1    0.20    1.10 
  18   2  -1   20.90    4.20 
  18   2  -1    4.30    3.10 
 -18  -2   1   19.20    2.60 
  17   2  -1    0.10    1.90 
  17   2  -1    1.90    2.60 
 -17  -2   1    1.50    1.10 
  16   2  -1    0.60    2.00 
  16   2  -1    4.40    2.10 
 -16  -2   1    5.30    1.40 
  15   2  -1    0.80    1.60 
  15   2  -1   -1.20    1.70 
 -15  -2   1   -1.00    0.80 
  14   2  -1    0.50    1.70 
  14   2  -1    1.70    1.50 
 -14  -2   1    0.40    0.80 
  13   2  -1   13.10    3.30 
  13   2  -1    9.80    2.40 
 -13  -2   1    8.00    1.40 
 -13  -2   1    8.30    1.40 
  12   2  -1   -0.20    1.10 
  12   2  -1   -0.10    1.40 
 -12  -2   1    0.50    0.70 
 -12  -2   1    1.40    0.70 
  11   2  -1    2.20    1.70 
  11   2  -1   12.40    2.30 
 -11  -2   1    8.30    0.90 
 -11  -2   1    4.50    0.90 
 -11  -2   1    4.70    1.00 
  10   2  -1   33.70    4.20 
  10   2  -1   34.20    3.60 
 -10  -2   1   31.20    1.70 
 -10  -2   1   29.30    1.70 
   9   2  -1  128.39    6.00 
   9   2  -1  155.68    7.60 
  -9  -2   1  137.79    4.40 
  -9  -2   1  136.59    4.40 
   8   2  -1  853.91   24.20 
   8   2  -1  857.61   26.90 
  -8  -2   1  885.51   22.50 
  -8  -2   1  823.92   22.40 
   7   2  -1   28.00    2.20 
   7   2  -1   26.60    3.10 
  -7  -2   1   27.00    1.10 
  -7  -2   1   26.30    1.10 
   6   2  -1   13.50    1.70 
   5   2  -1   17.10    2.30 
   5   2  -1   15.40    1.60 
   4   2  -1 3278.87   90.89 
   4   2  -1 3358.16   83.59 
   3   2  -1  224.98    7.80 
   3   2  -1  227.58    6.40 
  -3  -2   1  227.68    6.10 
  -3  -2   1  221.18    6.00 
   2   2  -1    1.40    0.50 
  -2  -2   1    1.40    0.50 
  -2  -2   1    1.40    0.40 
   1   2  -1    4.50    0.70 
   1   2  -1    4.10    0.60 
   1   2  -1    4.00    0.70 
  -1  -2   1    3.20    0.60 
  -1  -2   1    4.20    0.60 
  -1  -2   1    3.90    0.70 
   0   2  -1  250.27    7.20 
   0   2  -1  265.67    7.60 
   0   2  -1  255.77    7.40 
   0  -2   1  243.18    7.30 
   0  -2   1  252.17    7.50 
   0  -2   1  264.47    7.10 
   0  -2   1  255.97    7.50 
  -1   2  -1  305.67    8.70 
  -1   2  -1  303.47    9.00 
  -1   2  -1  305.07    8.80 
   1  -2   1  299.17    8.90 
   1  -2   1  298.27    8.90 
   1  -2   1  294.17    8.70 
   1  -2   1  322.07    8.60 
  -2   2  -1    4.50    1.00 
  -2   2  -1    6.90    1.10 
  -2   2  -1    7.50    1.20 
   2  -2   1    6.60    1.10 
   2  -2   1    5.60    1.00 
   2  -2   1    6.30    1.20 
   2  -2   1    6.20    1.10 
  -3   2  -1   14.90    1.60 
  -3   2  -1   14.30    1.60 
  -3   2  -1   13.00    1.60 
   3  -2   1   15.00    1.60 
   3  -2   1   13.30    1.60 
   3  -2   1   13.50    1.60 
   3  -2   1   11.10    1.40 
  -4   2  -1  799.02   22.40 
  -4   2  -1  825.02   22.00 
  -4   2  -1  836.62   22.80 
   4  -2   1  833.02   21.90 
   4  -2   1  790.82   22.40 
   4  -2   1  811.92   22.60 
   4  -2   1  839.92   22.70 
  -5   2  -1   58.79    3.00 
  -5   2  -1   55.79    3.10 
  -5   2  -1   62.39    3.20 
  -5   2  -1   63.29    3.30 
   5  -2   1   58.29    2.80 
   5  -2   1   57.69    3.60 
   5  -2   1   61.09    3.40 
   5  -2   1   56.89    3.20 
   5  -2   1   64.09    3.20 
  -6   2  -1   36.90    2.40 
  -6   2  -1   31.60    2.40 
  -6   2  -1   33.40    2.50 
  -6   2  -1   34.90    2.50 
   6  -2   1   34.80    2.10 
   6  -2   1   36.20    2.80 
   6  -2   1   36.20    3.00 
   6  -2   1   30.40    2.40 
   6  -2   1   34.30    2.40 
  -7   2  -1  156.38    6.20 
  -7   2  -1  145.39    6.00 
  -7   2  -1  170.98    6.30 
  -7   2  -1  153.48    5.80 
   7  -2   1  142.99    5.20 
   7  -2   1  149.88    6.10 
   7  -2   1  150.18    6.60 
   7  -2   1  146.19    7.00 
  -8   2  -1   38.30    2.80 
  -8   2  -1   32.30    2.50 
  -8   2  -1   37.50    2.80 
  -8   2  -1   29.20    2.90 
   8  -2   1   34.20    3.90 
   8  -2   1   33.50    2.70 
   8  -2   1   22.20    3.00 
   8  -2   1   33.70    2.00 
  -9   2  -1   16.30    2.30 
  -9   2  -1   13.80    2.10 
  -9   2  -1   10.60    1.80 
  -9   2  -1    8.10    1.70 
   9  -2   1    9.40    2.20 
   9  -2   1    8.90    1.80 
   9  -2   1   10.00    2.30 
   9  -2   1   11.70    1.30 
 -10   2  -1    9.80    1.90 
 -10   2  -1   15.40    2.40 
 -10   2  -1    9.60    1.90 
  10  -2   1   11.80    2.10 
  10  -2   1   11.30    2.60 
  10  -2   1   11.70    2.50 
 -11   2  -1    1.40    1.10 
 -11   2  -1    1.90    1.10 
  11  -2   1    1.10    1.10 
  11  -2   1    2.60    1.80 
  11  -2   1    0.10    1.30 
 -12   2  -1   41.40    3.20 
 -12   2  -1   40.20    4.10 
  12  -2   1   31.90    4.60 
  12  -2   1   40.20    4.80 
  12  -2   1   34.40    3.50 
 -13   2  -1   14.90    2.60 
 -13   2  -1    9.80    2.20 
  13  -2   1   14.20    3.50 
  13  -2   1   14.60    3.10 
  13  -2   1   12.80    2.20 
 -14   2  -1   -0.60    1.00 
 -14   2  -1   -1.70    1.00 
  14  -2   1    0.60    1.10 
  14  -2   1    0.30    1.60 
  14  -2   1    0.00    1.60 
 -15   2  -1   10.90    2.50 
 -15   2  -1    9.70    2.40 
  15  -2   1   11.40    2.30 
  15  -2   1   12.60    3.30 
  15  -2   1    9.30    3.20 
 -16   2  -1   15.00    3.00 
 -16   2  -1   27.10    3.70 
  16  -2   1   26.50    5.00 
  16  -2   1   18.70    2.70 
  16  -2   1   11.00    3.40 
 -17   2  -1   -0.80    1.60 
 -17   2  -1    1.70    1.70 
  17  -2   1   -3.30    2.00 
  17  -2   1   -0.60    1.90 
 -18   2  -1    0.10    1.80 
 -18   2  -1   -1.80    1.30 
  18  -2   1    5.60    2.90 
  18  -2   1    3.50    2.80 
 -19   2  -1    5.20    2.40 
 -19   2  -1    0.90    1.70 
  19  -2   1   10.30    3.90 
  19  -2   1    3.50    2.80 
  19   1  -1   11.50    4.30 
  19   1  -1   11.40    3.50 
 -19  -1   1    4.20    1.80 
  18   1  -1   94.69    7.50 
  18   1  -1   79.19    9.20 
 -18  -1   1   95.19    5.40 
  17   1  -1    0.20    2.40 
  17   1  -1    2.60    2.60 
 -17  -1   1    3.60    1.40 
  16   1  -1  116.29    8.50 
  16   1  -1  107.49    7.40 
 -16  -1   1  117.49    5.70 
  15   1  -1   36.10    5.50 
  15   1  -1   34.40    4.80 
 -15  -1   1   34.30    3.30 
  14   1  -1   16.60    3.30 
  14   1  -1   13.80    3.30 
 -14  -1   1    9.50    1.70 
  13   1  -1   11.70    3.10 
  13   1  -1   13.10    2.80 
 -13  -1   1   15.20    1.90 
 -13  -1   1   13.00    1.90 
  12   1  -1   73.09    5.80 
  12   1  -1   90.79    5.70 
 -12  -1   1   78.59    3.90 
 -12  -1   1   81.99    3.60 
 -12  -1   1   83.09    3.90 
  11   1  -1   19.00    3.10 
  11   1  -1   15.20    3.10 
 -11  -1   1   17.80    1.90 
 -11  -1   1   19.10    1.70 
 -11  -1   1   17.20    1.90 
  10   1  -1   78.89    5.40 
  10   1  -1   72.49    4.60 
 -10  -1   1   76.99    3.40 
 -10  -1   1   76.99    3.40 
 -10  -1   1   79.19    3.00 
   9   1  -1  125.59    6.00 
   9   1  -1  137.79    7.10 
  -9  -1   1  133.89    4.20 
  -9  -1   1  126.09    4.70 
  -9  -1   1  129.09    4.70 
  -9  -1   1  136.79    4.10 
   8   1  -1   12.00    2.10 
   8   1  -1   10.50    2.20 
  -8  -1   1   12.60    0.80 
  -8  -1   1   12.90    0.80 
  -8  -1   1   11.40    1.20 
  -8  -1   1   11.00    1.20 
   7   1  -1   35.30    3.10 
   7   1  -1   35.00    2.60 
  -7  -1   1   38.10    1.80 
  -7  -1   1   38.50    1.80 
   6   1  -1    6.00    1.60 
   6   1  -1    5.90    1.20 
  -6  -1   1    8.20    0.80 
  -6  -1   1    7.60    0.80 
   5   1  -1    3.00    1.10 
   5   1  -1    3.10    1.00 
  -5  -1   1    2.80    0.50 
  -5  -1   1    3.00    0.40 
   4   1  -1   73.39    3.70 
   4   1  -1   77.39    3.10 
  -4  -1   1   72.69    2.10 
  -4  -1   1   75.29    2.10 
   3   1  -1  515.25   15.60 
   3   1  -1  535.65   14.10 
   2   1  -1   37.70    1.50 
   2   1  -1   38.00    2.00 
   1   1  -1   82.49    2.40 
  -1  -1   1   78.89    2.40 
  -1  -1   1   79.29    2.20 
  -1  -1   1   77.89    2.40 
  -1  -1   1   80.69    2.20 
   0   1  -1  245.28    6.70 
   0   1  -1  246.48    6.90 
   0  -1   1  250.07    6.90 
   0  -1   1  243.18    6.70 
   0  -1   1  254.67    6.90 
  -1   1  -1 1533.55   38.00 
  -1   1  -1 1438.56   36.70 
  -1   1  -1 1441.46   37.70 
   1  -1   1 1468.55   36.90 
   1  -1   1 1448.66   36.70 
   1  -1   1 1391.16   37.60 
  -2   1  -1   20.70    1.40 
  -2   1  -1   21.50    1.40 
  -2   1  -1   22.40    1.30 
   2  -1   1   18.10    1.30 
   2  -1   1   20.50    1.30 
   2  -1   1   20.40    1.40 
   2  -1   1   21.00    1.20 
  -3   1  -1  191.98    6.00 
  -3   1  -1  200.88    6.30 
  -3   1  -1  211.68    6.40 
   3  -1   1  206.98    6.00 
   3  -1   1  201.48    6.90 
   3  -1   1  192.78    6.30 
   3  -1   1  203.38    6.30 
   3  -1   1  211.88    6.60 
  -4   1  -1  169.08    5.40 
  -4   1  -1  168.18    5.70 
  -4   1  -1  173.88    5.70 
   4  -1   1  170.68    6.10 
   4  -1   1  171.28    5.70 
   4  -1   1  172.58    6.50 
   4  -1   1  173.68    5.30 
   4  -1   1  174.68    5.60 
  -5   1  -1  258.57    8.10 
  -5   1  -1  237.98    7.60 
  -5   1  -1  227.78    7.50 
  -5   1  -1  231.28    7.10 
   5  -1   1  229.38    8.00 
   5  -1   1  226.58    7.40 
   5  -1   1  233.18    8.60 
   5  -1   1  236.78    6.80 
  -6   1  -1  287.07    9.00 
  -6   1  -1  280.07    8.40 
  -6   1  -1  275.97    8.90 
  -6   1  -1  274.17    8.80 
   6  -1   1  285.87   10.20 
   6  -1   1  274.87    8.80 
   6  -1   1  274.47    7.80 
   6  -1   1  285.67    9.60 
  -7   1  -1    1.10    0.80 
  -7   1  -1    2.10    0.90 
  -7   1  -1    1.30    0.70 
  -7   1  -1    0.80    0.90 
   7  -1   1    1.60    1.10 
   7  -1   1    1.80    0.90 
   7  -1   1    3.00    0.60 
   7  -1   1    1.90    1.20 
  -8   1  -1  170.58    6.40 
  -8   1  -1  178.98    6.50 
  -8   1  -1  173.18    6.10 
  -8   1  -1  169.68    6.40 
   8  -1   1  168.88    7.80 
   8  -1   1  172.48    6.30 
   8  -1   1  159.68    7.20 
  -9   1  -1    1.40    0.90 
  -9   1  -1    0.10    0.90 
  -9   1  -1   -0.70    0.60 
  -9   1  -1    1.40    0.90 
   9  -1   1    2.10    1.00 
   9  -1   1    2.60    1.30 
   9  -1   1    0.50    1.20 
 -10   1  -1   25.80    2.70 
 -10   1  -1   31.10    2.40 
 -10   1  -1   23.30    2.60 
  10  -1   1   24.70    3.80 
  10  -1   1   20.30    3.10 
  10  -1   1   30.70    2.90 
 -11   1  -1    1.30    1.00 
 -11   1  -1    1.80    1.00 
  11  -1   1    3.10    1.80 
  11  -1   1    2.50    1.10 
  11  -1   1    0.40    1.40 
 -12   1  -1   40.40    3.30 
 -12   1  -1   43.10    3.10 
  12  -1   1   40.50    4.70 
  12  -1   1   37.40    4.90 
  12  -1   1   43.80    3.00 
 -13   1  -1    0.80    1.10 
 -13   1  -1    0.30    1.10 
  13  -1   1    1.20    1.40 
  13  -1   1    0.70    1.00 
  13  -1   1    1.00    1.80 
 -14   1  -1   36.10    3.70 
 -14   1  -1   39.60    4.10 
  14  -1   1   41.40    5.70 
  14  -1   1   36.80    5.00 
  14  -1   1   34.30    3.20 
 -15   1  -1   48.30    3.90 
 -15   1  -1   53.29    4.20 
  15  -1   1   59.79    3.50 
  15  -1   1   45.70    5.70 
  15  -1   1   44.20    6.10 
 -16   1  -1   16.50    2.80 
 -16   1  -1   16.70    3.00 
  16  -1   1   16.10    4.00 
  16  -1   1   20.20    4.10 
 -17   1  -1  116.89    6.50 
 -17   1  -1   95.09    6.20 
  17  -1   1  113.49    8.10 
  17  -1   1  116.09    9.00 
 -18   1  -1   35.80    4.40 
  18  -1   1   34.60    5.70 
  18  -1   1   33.80    6.20 
 -19   1  -1    7.60    2.50 
  19  -1   1    3.30    3.00 
  19  -1   1    2.20    2.90 
  19   0  -1   -1.90    1.80 
  19   0  -1   -1.00    2.10 
 -19   0   1    0.70    1.40 
  18   0  -1    1.10    2.20 
  18   0  -1    2.40    3.00 
 -18   0   1   -0.50    1.20 
  17   0  -1    2.10    2.20 
  17   0  -1   -0.60    2.10 
 -17   0   1   -1.00    1.10 
  16   0  -1   -0.30    1.60 
  16   0  -1   -1.70    1.40 
 -16   0   1    0.00    1.00 
  15   0  -1    0.10    1.80 
  15   0  -1    0.60    1.80 
 -15   0   1    0.50    1.10 
 -15   0   1    0.00    1.10 
  14   0  -1   -0.40    1.60 
  14   0  -1    2.30    2.00 
 -14   0   1    0.90    1.00 
 -14   0   1    0.70    1.10 
  13   0  -1   -0.60    1.30 
  13   0  -1    0.30    0.70 
  13   0  -1    1.00    1.60 
 -13   0   1   -0.60    0.90 
 -13   0   1   -0.30    0.90 
  12   0  -1   -1.60    1.20 
  12   0  -1   -0.40    1.40 
  12   0  -1   -1.10    0.60 
 -12   0   1    0.20    0.80 
 -12   0   1   -0.20    0.80 
  11   0  -1    0.20    0.70 
  11   0  -1   -1.80    0.90 
  11   0  -1   -1.30    1.20 
 -11   0   1    0.30    0.90 
 -11   0   1    0.20    0.70 
 -11   0   1    0.20    0.80 
  10   0  -1   -0.10    1.20 
  10   0  -1    0.40    1.10 
  10   0  -1   -0.30    0.60 
 -10   0   1   -0.40    0.70 
 -10   0   1    0.10    0.60 
 -10   0   1   -0.50    0.60 
   9   0  -1    0.50    0.60 
   9   0  -1   -0.10    1.00 
   9   0  -1    0.10    1.10 
  -9   0   1    0.40    0.60 
  -9   0   1    0.30    0.60 
  -9   0   1   -0.30    0.70 
   8   0  -1    0.00    0.80 
   8   0  -1    0.70    1.10 
   8   0  -1    0.00    0.50 
  -8   0   1   -0.50    0.50 
  -8   0   1    0.00    0.60 
  -8   0   1   -0.50    0.50 
   7   0  -1    0.00    0.50 
   7   0  -1    1.00    1.10 
   7   0  -1   -0.70    0.80 
  -7   0   1   -0.60    0.50 
  -7   0   1    0.50    0.50 
  -7   0   1    0.30    0.50 
   6   0  -1   -0.60    1.00 
   6   0  -1    0.80    0.80 
   6   0  -1    0.40    0.50 
  -6   0   1    0.00    0.40 
  -6   0   1   -0.40    0.40 
  -6   0   1    0.20    0.50 
   5   0  -1   -0.10    0.50 
   5   0  -1    0.30    0.80 
   5   0  -1   -1.40    0.60 
  -5   0   1   -0.10    0.40 
  -5   0   1   -0.30    0.40 
  -5   0   1    0.40    0.40 
  -5   0   1    0.00    0.50 
   4   0  -1   -0.20    0.50 
   4   0  -1    0.40    0.70 
   4   0  -1   -0.40    0.70 
  -4   0   1   -0.50    0.40 
  -4   0   1    0.20    0.40 
  -4   0   1    0.00    0.40 
  -4   0   1    0.00    0.30 
   3   0  -1   -0.60    0.40 
   3   0  -1   -1.10    0.60 
   3   0  -1    0.10    0.60 
   3   0  -1   -0.20    0.40 
  -3   0   1   -0.10    0.30 
  -3   0   1   -0.20    0.40 
  -3   0   1    0.40    0.30 
  -3   0   1    0.00    0.40 
   2   0  -1   -2.10    0.40 
   2   0  -1   -2.50    0.20 
   2   0  -1   -2.40    0.40 
  -2   0   1   -2.20    0.20 
  -2   0   1   -2.10    0.30 
  -2   0   1   -1.90    0.20 
  -2   0   1   -1.90    0.30 
   1   0  -1   -0.10    0.10 
   1   0  -1    0.00    0.20 
   1   0  -1   -0.10    0.10 
   1   0  -1   -0.20    0.20 
  -1   0   1   -0.20    0.20 
  -1   0   1   -0.30    0.10 
  -1   0   1    0.10    0.20 
  -1   0   1    0.10    0.20 
  -1   0  -1   -2.10    0.20 
  -1   0  -1   -2.70    0.20 
  -1   0  -1   -2.50    0.20 
  -1   0  -1   -2.60    0.20 
   1   0   1   -2.30    0.30 
   1   0   1   -2.60    0.20 
  -2   0  -1   -0.20    0.30 
  -2   0  -1    0.10    0.30 
  -2   0  -1   -0.40    0.30 
  -2   0  -1    0.10    0.30 
   2   0   1    0.00    0.20 
   2   0   1   -0.10    0.50 
   2   0   1    0.10    0.30 
   2   0   1   -0.30    0.40 
  -3   0  -1   -0.70    0.40 
  -3   0  -1   -0.30    0.40 
  -3   0  -1   -0.50    0.30 
  -3   0  -1    0.00    0.40 
   3   0   1   -1.00    0.50 
   3   0   1   -0.50    0.20 
   3   0   1   -0.40    0.70 
   3   0   1    0.40    0.50 
  -4   0  -1   -0.60    0.40 
  -4   0  -1   -0.50    0.40 
  -4   0  -1   -0.30    0.40 
   4   0   1    0.30    0.70 
   4   0   1    0.20    0.90 
   4   0   1   -0.40    0.50 
  -5   0  -1    0.00    0.40 
  -5   0  -1   -0.30    0.50 
  -5   0  -1   -0.20    0.40 
   5   0   1   -0.70    0.70 
   5   0   1    0.00    0.80 
   5   0   1   -0.40    0.50 
  -6   0  -1    0.60    0.50 
  -6   0  -1    0.40    0.50 
  -6   0  -1   -0.10    0.50 
   6   0   1    0.00    0.60 
   6   0   1   -0.50    0.90 
   6   0   1   -1.00    0.70 
  -7   0  -1   -0.10    0.60 
  -7   0  -1   -0.30    0.50 
  -7   0  -1   -0.40    0.60 
   7   0   1   -0.60    0.90 
   7   0   1   -0.20    1.00 
   7   0   1   -0.80    0.50 
  -8   0  -1   -0.20    0.50 
  -8   0  -1   -0.90    0.50 
  -8   0  -1   -0.20    0.50 
   8   0   1   -0.30    0.60 
   8   0   1   -0.20    0.90 
   8   0   1    0.40    1.10 
  -9   0  -1   -0.10    0.60 
  -9   0  -1   -1.10    0.50 
  -9   0  -1    0.80    0.70 
   9   0   1    0.50    1.20 
   9   0   1   -0.60    0.80 
   9   0   1   -0.40    0.50 
 -10   0  -1    0.70    0.80 
 -10   0  -1    0.50    0.70 
 -10   0  -1    0.50    0.70 
  10   0   1   -0.30    0.70 
  10   0   1    0.50    1.00 
  10   0   1   -1.30    0.90 
 -11   0  -1    0.60    0.80 
 -11   0  -1   -0.20    0.80 
 -11   0  -1    0.00    0.80 
  11   0   1    0.10    0.60 
  11   0   1   -1.40    0.80 
  11   0   1   -1.20    1.10 
 -12   0  -1    1.00    0.90 
 -12   0  -1   -0.20    0.70 
  12   0   1   -1.10    0.70 
  12   0   1   -1.50    1.30 
  12   0   1   -1.10    1.10 
 -13   0  -1    0.80    1.10 
 -13   0  -1   -1.20    0.70 
  13   0   1    0.20    1.30 
  13   0   1   -0.20    0.70 
  13   0   1    0.30    1.50 
 -14   0  -1    0.40    1.00 
 -14   0  -1    0.80    1.00 
  14   0   1   -0.20    1.40 
  14   0   1   -1.50    1.50 
 -15   0  -1   -1.80    1.00 
 -15   0  -1    1.50    1.20 
  15   0   1    2.50    2.10 
  15   0   1   -1.00    1.80 
 -16   0  -1    0.50    1.20 
  16   0   1    2.00    2.10 
  16   0   1   -1.40    1.70 
 -17   0  -1    0.50    1.20 
  17   0   1    0.90    2.20 
  17   0   1    0.00    2.30 
 -18   0  -1    0.20    1.40 
  18   0   1   -2.80    1.90 
  18   0   1   -2.70    2.30 
 -19   0  -1    0.60    1.60 
  19   0   1   -1.60    2.70 
  19   0   1    4.20    2.90 
  19  -1  -1    2.00    3.00 
  19  -1  -1    5.30    2.70 
 -19   1   1    6.50    2.30 
  18  -1  -1   61.79    7.50 
  18  -1  -1   72.49    8.40 
 -18   1   1   72.89    5.40 
  17  -1  -1    2.50    2.30 
  17  -1  -1    3.10    2.40 
 -17   1   1    6.10    2.00 
 -17   1   1    2.80    1.70 
  16  -1  -1  128.19    8.30 
  16  -1  -1  119.99    8.70 
 -16   1   1  126.09    6.50 
 -16   1   1  107.49    6.40 
  15  -1  -1   33.40    5.30 
  15  -1  -1   42.40    5.50 
  15  -1  -1   33.60    2.70 
 -15   1   1   27.80    3.50 
 -15   1   1   35.50    3.70 
  14  -1  -1   19.30    2.30 
  14  -1  -1   17.20    3.70 
  14  -1  -1   12.00    3.10 
 -14   1   1   10.20    2.20 
 -14   1   1   15.20    2.40 
  13  -1  -1   12.40    3.20 
  13  -1  -1   12.10    2.80 
  13  -1  -1   12.20    1.90 
 -13   1   1   14.40    2.30 
 -13   1   1   13.40    2.30 
  12  -1  -1   86.79    4.20 
  12  -1  -1   93.29    6.40 
  12  -1  -1   86.09    5.80 
 -12   1   1   85.39    4.80 
 -12   1   1   91.59    4.50 
  11  -1  -1   13.10    2.80 
  11  -1  -1   13.70    1.90 
  11  -1  -1   11.60    2.70 
 -11   1   1   18.10    2.40 
 -11   1   1   22.20    2.40 
  10  -1  -1   82.79    5.50 
  10  -1  -1   73.39    3.80 
  10  -1  -1   70.59    4.80 
 -10   1   1   86.09    4.30 
 -10   1   1   77.29    3.80 
 -10   1   1   75.79    4.10 
   9  -1  -1  137.69    5.30 
   9  -1  -1  134.39    6.50 
   9  -1  -1  124.29    6.80 
  -9   1   1  126.89    5.40 
  -9   1   1  126.79    5.40 
  -9   1   1  120.29    4.90 
  -9   1   1  132.39    5.40 
   8  -1  -1    8.90    2.10 
   8  -1  -1   12.30    1.70 
   8  -1  -1    9.90    2.00 
  -8   1   1   11.60    1.60 
  -8   1   1   12.70    1.60 
  -8   1   1   12.10    1.70 
  -8   1   1   14.30    1.90 
   7  -1  -1   44.20    3.10 
   7  -1  -1   38.60    1.40 
   7  -1  -1   40.70    2.50 
   7  -1  -1   43.60    3.30 
  -7   1   1   45.00    2.90 
  -7   1   1   43.80    2.60 
  -7   1   1   38.40    2.40 
  -7   1   1   37.80    2.30 
   6  -1  -1    9.60    1.30 
   6  -1  -1    6.50    1.50 
   6  -1  -1    9.20    0.90 
   6  -1  -1    5.60    1.50 
  -6   1   1    8.20    1.20 
  -6   1   1    8.90    1.30 
  -6   1   1    7.10    1.20 
   5  -1  -1    0.60    0.90 
   5  -1  -1    3.40    1.10 
   5  -1  -1    2.70    0.60 
   5  -1  -1    2.20    0.80 
  -5   1   1    2.30    0.80 
  -5   1   1    3.30    0.90 
  -5   1   1    2.90    0.80 
   4  -1  -1   78.09    2.70 
   4  -1  -1   79.09    3.60 
   4  -1  -1   77.69    3.50 
   4  -1  -1   76.49    3.00 
   4  -1  -1   71.69    3.10 
   4  -1  -1   71.99    3.00 
  -4   1   1   74.39    3.10 
  -4   1   1   72.39    2.80 
  -4   1   1   67.39    3.00 
   3  -1  -1  524.25   14.50 
   3  -1  -1  554.84   14.60 
   3  -1  -1  560.04   14.80 
   3  -1  -1  528.45   15.70 
   3  -1  -1  521.55   14.10 
  -3   1   1  524.45   14.60 
  -3   1   1  537.45   14.10 
  -3   1   1  503.55   14.60 
   2  -1  -1   36.60    1.80 
   2  -1  -1   38.90    1.80 
   2  -1  -1   36.50    1.90 
   2  -1  -1   39.80    1.90 
   2  -1  -1   35.90    1.70 
  -2   1   1   39.50    1.70 
  -2   1   1   38.30    1.80 
  -2   1   1   36.10    1.80 
   1  -1  -1   84.19    2.80 
   1  -1  -1   82.49    2.80 
   1  -1  -1   80.29    2.70 
  -1   1   1   82.79    2.80 
  -1   1   1   78.39    2.80 
  -1   1   1   78.59    2.60 
   0  -1  -1  244.68    6.80 
   0  -1  -1  246.58    6.70 
   0  -1  -1  247.38    6.80 
   0   1   1  241.68    6.80 
   0   1   1  249.18    6.60 
  -1  -1  -1 1399.56   35.60 
  -1  -1  -1 1427.56   36.60 
  -1  -1  -1 1432.76   36.60 
  -1  -1  -1 1429.66   35.60 
   1   1   1 1413.56   36.60 
   1   1   1 1447.06   38.70 
   1   1   1 1428.76   35.50 
  -2  -1  -1   22.50    0.90 
  -2  -1  -1   19.90    0.90 
   2   1   1   19.90    1.10 
   2   1   1   22.00    1.50 
  -3  -1  -1  205.78    5.50 
  -3  -1  -1  191.38    5.50 
   3   1   1  197.48    5.30 
   3   1   1  200.98    6.00 
   3   1   1  192.68    6.70 
  -4  -1  -1  171.58    5.00 
   4   1   1  173.98    6.50 
   4   1   1  174.38    4.80 
   4   1   1  178.78    5.80 
  -5  -1  -1  228.68    6.60 
  -5  -1  -1  225.78    6.60 
   5   1   1  234.98    8.40 
   5   1   1  225.08    7.50 
   5   1   1  240.58    6.40 
  -6  -1  -1  289.57    7.40 
  -6  -1  -1  286.17    7.40 
  -6  -1  -1  276.67    8.20 
  -6  -1  -1  288.57    8.20 
   6   1   1  276.87    9.20 
   6   1   1  290.27    7.80 
   6   1   1  280.87   10.30 
  -7  -1  -1    2.00    0.70 
  -7  -1  -1    0.90    0.60 
  -7  -1  -1    0.90    0.40 
  -7  -1  -1    1.50    0.50 
   7   1   1    0.30    0.70 
   7   1   1    2.40    0.60 
   7   1   1    2.70    1.30 
  -8  -1  -1  172.88    5.20 
  -8  -1  -1  165.08    5.70 
  -8  -1  -1  162.98    5.60 
  -8  -1  -1  167.88    5.10 
   8   1   1  181.48    7.90 
   8   1   1  174.28    7.00 
   8   1   1  179.08    5.10 
  -9  -1  -1    0.80    0.50 
  -9  -1  -1    0.20    0.50 
  -9  -1  -1    0.70    0.70 
   9   1   1    0.00    0.50 
   9   1   1    1.30    0.50 
   9   1   1    2.10    1.30 
   9   1   1    2.30    1.40 
 -10  -1  -1   26.80    2.00 
 -10  -1  -1   26.50    1.80 
 -10  -1  -1   28.40    2.10 
  10   1   1   27.10    3.20 
  10   1   1   28.20    1.40 
  10   1   1   27.10    1.40 
  10   1   1   26.30    3.70 
 -11  -1  -1    4.60    1.10 
 -11  -1  -1    4.00    1.00 
 -11  -1  -1    2.90    1.00 
  11   1   1    0.40    1.20 
  11   1   1    2.80    0.50 
  11   1   1    1.70    1.60 
 -12  -1  -1   42.60    2.60 
 -12  -1  -1   38.80    2.80 
 -12  -1  -1   45.20    3.00 
  12   1   1   34.20    4.70 
  12   1   1   47.00    5.00 
 -13  -1  -1    0.60    0.90 
 -13  -1  -1    0.40    0.90 
  13   1   1   -0.60    1.10 
  13   1   1    3.60    2.10 
 -14  -1  -1   35.10    3.30 
 -14  -1  -1   39.50    2.80 
  14   1   1   40.20    5.00 
  14   1   1   35.70    5.20 
 -15  -1  -1   45.50    3.40 
  15   1   1   54.89    6.00 
  15   1   1   48.90    6.40 
 -16  -1  -1   13.90    2.30 
  16   1   1    9.80    3.00 
  16   1   1   13.70    4.00 
 -17  -1  -1  102.79    5.60 
  17   1   1  105.89    7.60 
  17   1   1  105.29    8.50 
 -18  -1  -1   34.50    3.80 
  18   1   1   38.60    5.70 
  18   1   1   37.70    6.20 
 -19  -1  -1    6.50    2.00 
  19   1   1    7.10    3.00 
  19   1   1    3.60    3.20 
  19  -2  -1    0.30    2.80 
  19  -2  -1    1.70    2.60 
 -19   2   1    1.80    1.90 
 -19   2   1    0.10    2.20 
  18  -2  -1   23.40    4.80 
  18  -2  -1   25.80    5.60 
 -18   2   1   25.80    3.90 
 -18   2   1   15.20    3.20 
  17  -2  -1    0.40    1.90 
  17  -2  -1    0.50    2.20 
 -17   2   1   -0.40    1.60 
 -17   2   1    3.90    1.90 
  16  -2  -1    4.00    2.50 
  16  -2  -1    9.60    2.10 
  16  -2  -1    6.70    2.70 
 -16   2   1   10.10    2.50 
 -16   2   1    9.70    2.50 
  15  -2  -1   -2.40    1.20 
  15  -2  -1   -0.20    1.60 
  15  -2  -1   -0.30    1.10 
 -15   2   1    1.20    1.50 
 -15   2   1    0.30    1.20 
  14  -2  -1    2.40    1.90 
  14  -2  -1    0.80    1.90 
  14  -2  -1   -1.10    1.00 
 -14   2   1    0.60    1.20 
 -14   2   1    0.80    1.30 
  13  -2  -1    7.60    2.70 
  13  -2  -1    8.90    2.00 
  13  -2  -1   10.80    2.80 
 -13   2   1    7.60    2.00 
 -13   2   1   10.00    2.10 
  12  -2  -1    0.70    1.40 
  12  -2  -1   -0.30    0.90 
  12  -2  -1   -0.90    1.30 
 -12   2   1    0.00    0.90 
 -12   2   1    0.20    1.00 
  11  -2  -1    5.70    1.50 
  11  -2  -1    5.10    2.10 
  11  -2  -1    5.00    1.90 
 -11   2   1    5.20    1.50 
 -11   2   1    6.70    1.60 
  10  -2  -1   31.70    3.80 
  10  -2  -1   28.00    3.80 
  10  -2  -1   34.30    3.30 
 -10   2   1   30.80    3.20 
 -10   2   1   30.10    2.90 
 -10   2   1   28.10    3.00 
   9  -2  -1  135.49    7.20 
   9  -2  -1  134.89    6.80 
   9  -2  -1  144.69    4.70 
   9  -2  -1  141.09    6.00 
  -9   2   1  140.99    6.20 
  -9   2   1  140.69    5.70 
  -9   2   1  147.29    6.20 
  -9   2   1  146.39    6.20 
   8  -2  -1  860.71   26.70 
   8  -2  -1  861.81   22.60 
   8  -2  -1  836.82   24.00 
   8  -2  -1  826.82   25.00 
  -8   2   1  847.72   24.50 
  -8   2   1  851.81   24.40 
  -8   2   1  891.21   24.20 
  -8   2   1  836.22   23.50 
   7  -2  -1   25.70    1.80 
   7  -2  -1   29.90    2.80 
   7  -2  -1   25.90    3.10 
   7  -2  -1   27.10    3.00 
  -7   2   1   28.20    2.20 
  -7   2   1   29.60    2.40 
  -7   2   1   33.10    2.90 
  -7   2   1   30.70    2.40 
   6  -2  -1   14.50    2.30 
   6  -2  -1   12.40    2.10 
   6  -2  -1   14.00    1.60 
   6  -2  -1   12.40    1.70 
   6  -2  -1   13.90    1.90 
  -6   2   1   17.30    2.10 
  -6   2   1   14.00    1.90 
  -6   2   1   19.20    2.10 
  -6   2   1   20.50    2.10 
   5  -2  -1   14.90    2.00 
   5  -2  -1   15.00    1.80 
   5  -2  -1   13.40    2.00 
   5  -2  -1   14.50    1.60 
   5  -2  -1   13.20    1.60 
  -5   2   1   16.40    1.80 
  -5   2   1   15.90    1.90 
  -5   2   1   12.00    1.70 
  -5   2   1   13.70    1.70 
   4  -2  -1 3274.77   88.99 
   4  -2  -1 3260.07   82.89 
   4  -2  -1 3342.87   84.29 
   4  -2  -1 3001.80   82.69 
   4  -2  -1 3049.79   82.79 
   4  -2  -1 3335.17   81.99 
  -4   2   1 3317.37   82.79 
  -4   2   1 3252.57   81.99 
  -4   2   1 3173.98   84.19 
  -4   2   1 3471.45   84.39 
   3  -2  -1  206.88    6.80 
   3  -2  -1  216.88    7.20 
   3  -2  -1  232.68    7.20 
   3  -2  -1  227.78    7.30 
  -3   2   1  232.58    7.00 
  -3   2   1  214.88    7.10 
  -3   2   1  223.28    7.20 
   2  -2  -1    1.10    0.70 
   2  -2  -1    1.60    0.80 
   2  -2  -1    1.50    0.80 
   2  -2  -1    1.10    0.90 
  -2   2   1    0.20    0.60 
  -2   2   1    0.50    0.80 
  -2   2   1    2.20    0.90 
   1  -2  -1    4.70    0.80 
   1  -2  -1    7.30    1.10 
   1  -2  -1    4.80    0.90 
   1  -2  -1    4.40    0.90 
  -1   2   1    5.20    0.90 
  -1   2   1    5.10    0.90 
  -1   2   1    5.00    0.90 
   0  -2  -1  255.67    7.50 
   0  -2  -1  259.57    7.30 
   0  -2  -1  251.97    7.50 
   0   2   1  253.67    7.50 
   0   2   1  246.48    7.40 
   0   2   1  250.67    7.10 
  -1  -2  -1  316.37    8.40 
  -1  -2  -1  313.37    8.70 
  -1  -2  -1  296.37    8.70 
   1   2   1  308.17    8.20 
   1   2   1  301.87    8.60 
   1   2   1  308.77    8.60 
  -2  -2  -1    7.90    0.80 
  -2  -2  -1    8.50    0.70 
  -2  -2  -1    7.20    0.80 
  -2  -2  -1    8.40    0.70 
   2   2   1    6.60    1.10 
   2   2   1    7.50    0.80 
  -3  -2  -1   13.70    0.90 
  -3  -2  -1   13.40    0.90 
   3   2   1   16.80    1.80 
   3   2   1   12.40    1.10 
   3   2   1   13.00    0.80 
  -4  -2  -1  810.12   20.80 
  -4  -2  -1  795.82   20.80 
   4   2   1  790.42   21.10 
  -5  -2  -1   61.39    2.10 
  -5  -2  -1   60.69    2.10 
   5   2   1   58.59    3.50 
   5   2   1   65.49    3.00 
  -6  -2  -1   34.60    1.50 
   6   2   1   37.20    2.40 
   6   2   1   40.50    3.00 
  -7  -2  -1  156.48    4.70 
  -7  -2  -1  145.09    4.70 
   7   2   1  161.68    6.10 
   7   2   1  147.19    6.90 
  -8  -2  -1   34.90    1.70 
  -8  -2  -1   32.60    1.70 
   8   2   1   36.20    3.90 
   8   2   1   34.60    3.20 
  -9  -2  -1   10.80    0.70 
  -9  -2  -1    7.70    1.10 
  -9  -2  -1   10.80    1.20 
  -9  -2  -1   11.40    0.70 
   9   2   1   10.10    2.40 
   9   2   1    9.60    1.90 
 -10  -2  -1   15.10    1.50 
 -10  -2  -1   12.50    1.40 
 -10  -2  -1   13.00    1.00 
  10   2   1   13.40    2.30 
  10   2   1   12.50    2.70 
 -11  -2  -1    1.20    0.70 
 -11  -2  -1    3.50    1.00 
 -11  -2  -1    2.20    0.70 
  11   2   1    2.60    1.40 
  11   2   1    2.20    1.60 
 -12  -2  -1   38.40    2.10 
 -12  -2  -1   34.10    2.30 
 -12  -2  -1   34.80    2.40 
  12   2   1   38.30    4.90 
  12   2   1   29.90    3.80 
 -13  -2  -1   11.90    1.70 
  13   2   1   11.90    3.00 
  13   2   1   13.90    2.80 
 -14  -2  -1    0.20    0.90 
  14   2   1   -0.60    1.20 
  14   2   1   -1.10    1.30 
 -15  -2  -1   10.50    1.80 
  15   2   1    9.20    3.20 
  15   2   1    3.00    2.20 
 -16  -2  -1   16.40    2.30 
  16   2   1   23.30    4.80 
  16   2   1   18.80    3.70 
 -17  -2  -1    0.60    1.10 
  17   2   1   -0.70    1.80 
  17   2   1   -0.60    2.30 
 -18  -2  -1    0.30    1.20 
  18   2   1   -1.40    1.70 
  18   2   1   -1.40    2.10 
 -19  -2  -1    2.40    1.50 
  19   2   1    0.80    3.10 
  19   2   1    4.10    2.40 
  19  -3  -1   -0.70    2.20 
  19  -3  -1    0.60    2.40 
 -19   3   1    3.10    2.30 
 -19   3   1    1.00    2.00 
  18  -3  -1   59.09    8.00 
  18  -3  -1   54.19    7.10 
 -18   3   1   55.89    6.00 
 -18   3   1   73.89    5.80 
  17  -3  -1    9.20    3.60 
  17  -3  -1   11.50    2.50 
  17  -3  -1   14.40    3.80 
 -17   3   1    8.20    2.60 
 -17   3   1   10.20    2.90 
  16  -3  -1   46.20    6.60 
  16  -3  -1   37.30    5.70 
  16  -3  -1   50.19    4.60 
 -16   3   1   48.70    5.10 
 -16   3   1   34.30    4.70 
  15  -3  -1   50.69    6.60 
  15  -3  -1   50.09    6.20 
  15  -3  -1   52.39    4.80 
 -15   3   1   56.69    5.30 
 -15   3   1   46.00    5.10 
  14  -3  -1    1.40    1.40 
  14  -3  -1   -1.70    1.30 
  14  -3  -1   -0.60    1.40 
 -14   3   1    0.20    1.30 
 -14   3   1    0.40    1.40 
  13  -3  -1   31.10    4.50 
  13  -3  -1   22.00    4.00 
  13  -3  -1   31.60    3.70 
 -13   3   1   35.30    3.90 
 -13   3   1   29.20    3.80 
  12  -3  -1  247.18    9.80 
  12  -3  -1  248.08   11.80 
  12  -3  -1  244.78   11.20 
 -12   3   1  245.58    9.70 
 -12   3   1  249.48   10.20 
  11  -3  -1    3.00    1.60 
  11  -3  -1    2.00    1.40 
  11  -3  -1    3.30    1.90 
 -11   3   1    6.20    1.70 
 -11   3   1    5.30    1.70 
  10  -3  -1    0.80    1.00 
  10  -3  -1    0.30    1.20 
  10  -3  -1    0.40    1.30 
  10  -3  -1    0.80    0.80 
 -10   3   1   -0.30    0.80 
 -10   3   1    2.60    1.20 
 -10   3   1    1.00    1.20 
   9  -3  -1   15.60    2.80 
   9  -3  -1   12.40    2.50 
   9  -3  -1   15.60    2.40 
   9  -3  -1   14.20    1.80 
  -9   3   1   14.40    2.20 
  -9   3   1   14.80    2.50 
  -9   3   1   16.30    2.40 
   8  -3  -1  171.38    8.00 
   8  -3  -1  172.68    7.00 
   8  -3  -1  195.08    8.00 
   8  -3  -1  166.98    7.10 
   8  -3  -1  165.58    6.20 
  -8   3   1  178.18    7.20 
  -8   3   1  170.88    7.10 
  -8   3   1  159.18    7.10 
  -8   3   1  162.88    6.70 
   7  -3  -1  100.79    4.30 
   7  -3  -1   94.59    4.60 
   7  -3  -1   85.89    4.90 
   7  -3  -1  100.59    5.50 
   7  -3  -1   85.59    4.60 
  -7   3   1   88.19    4.60 
  -7   3   1   88.99    4.40 
  -7   3   1   85.39    4.60 
   6  -3  -1  115.99    5.20 
   6  -3  -1  121.69    5.00 
   6  -3  -1  122.69    5.70 
   6  -3  -1  115.19    5.40 
   6  -3  -1  123.89    6.00 
  -6   3   1  127.39    5.50 
  -6   3   1  126.59    5.50 
  -6   3   1  129.29    5.20 
   5  -3  -1   28.70    2.50 
   5  -3  -1   28.80    2.30 
   5  -3  -1   27.00    2.80 
   5  -3  -1   25.70    2.70 
   5  -3  -1   28.90    2.80 
  -5   3   1   29.20    2.90 
  -5   3   1   24.40    2.40 
  -5   3   1   22.70    2.50 
   4  -3  -1  605.04   17.20 
   4  -3  -1  635.04   17.80 
   4  -3  -1  625.64   17.90 
   4  -3  -1  604.34   17.60 
   4  -3  -1  616.84   17.90 
  -4   3   1  612.04   17.70 
  -4   3   1  602.84   17.30 
  -4   3   1  604.04   17.90 
   3  -3  -1   19.10    2.00 
   3  -3  -1   17.60    1.90 
   3  -3  -1   19.70    2.00 
   3  -3  -1   17.60    2.10 
  -3   3   1   18.00    2.00 
  -3   3   1   17.80    2.00 
  -3   3   1   20.90    2.00 
   2  -3  -1   34.40    2.10 
   2  -3  -1   32.40    2.10 
   2  -3  -1   30.00    2.20 
   2  -3  -1   33.60    2.20 
  -2   3   1   34.50    2.10 
  -2   3   1   37.10    2.40 
  -2   3   1   31.70    2.20 
   1  -3  -1    8.20    1.30 
   1  -3  -1   10.20    1.50 
   1  -3  -1    9.20    1.10 
   1  -3  -1    5.90    1.10 
  -1   3   1    7.20    1.20 
  -1   3   1    6.80    1.10 
  -1   3   1    7.90    1.30 
   0  -3  -1   89.89    3.70 
   0  -3  -1   88.99    3.00 
   0  -3  -1   90.79    3.60 
   0  -3  -1   89.49    3.70 
   0  -3  -1   82.69    3.40 
   0   3   1   92.09    3.60 
   0   3   1   88.29    3.60 
   0   3   1   88.39    3.30 
  -1  -3  -1  196.58    6.30 
  -1  -3  -1  200.08    6.30 
  -1  -3  -1  199.28    6.10 
   1   3   1  193.88    6.30 
   1   3   1  193.28    6.20 
   1   3   1  198.78    5.80 
  -2  -3  -1    2.00    0.70 
  -2  -3  -1    2.40    0.70 
  -2  -3  -1    2.80    0.70 
   2   3   1    2.80    0.70 
   2   3   1    2.60    0.40 
  -3  -3  -1  396.96   11.10 
  -3  -3  -1  403.86   10.50 
  -3  -3  -1  388.96   11.10 
  -3  -3  -1  397.36   10.50 
   3   3   1  400.46   10.80 
  -4  -3  -1  385.96   10.70 
  -4  -3  -1  383.26   10.60 
   4   3   1  387.76   12.60 
   4   3   1  387.46   10.20 
  -5  -3  -1   46.00    1.90 
  -5  -3  -1   44.90    1.80 
   5   3   1   48.50    2.30 
   5   3   1   44.10    3.10 
  -6  -3  -1  289.17    8.20 
  -6  -3  -1  297.97    8.20 
   6   3   1  294.97   10.80 
   6   3   1  298.67    9.10 
  -7  -3  -1   35.80    1.60 
  -7  -3  -1   38.70    1.60 
   7   3   1   36.80    2.40 
   7   3   1   37.30    3.90 
  -8  -3  -1   84.69    2.90 
   8   3   1   76.19    5.00 
   8   3   1   75.99    5.00 
   8   3   1   85.89    4.20 
  -9  -3  -1   14.30    1.10 
  -9  -3  -1   13.40    1.10 
   9   3   1   14.50    2.20 
 -10  -3  -1   12.90    1.30 
 -10  -3  -1   15.50    1.40 
  10   3   1   16.40    2.40 
 -11  -3  -1   28.90    1.80 
 -11  -3  -1   27.80    1.70 
  11   3   1   29.40    3.40 
 -12  -3  -1  134.69    4.80 
 -12  -3  -1  122.79    4.60 
  12   3   1  112.39    6.30 
 -13  -3  -1    0.00    0.70 
 -13  -3  -1    1.40    0.80 
  13   3   1   -0.30    1.60 
  13   3   1    0.80    1.50 
 -14  -3  -1   15.50    1.80 
  14   3   1   11.50    2.70 
 -15  -3  -1   64.89    3.40 
  15   3   1   68.19    6.50 
 -16  -3  -1   31.80    2.50 
  16   3   1   28.50    4.30 
  16   3   1   35.20    5.90 
  16   3   1   35.10    5.90 
 -17  -3  -1   30.60    2.80 
  17   3   1   40.00    5.50 
  17   3   1   23.10    5.60 
 -18  -3  -1   54.09    3.40 
  18   3   1   55.19    7.90 
 -19  -3  -1   30.10    2.90 
  19   3   1   26.10    6.00 
  19  -4  -1   -4.70    2.60 
  19  -4  -1   -2.90    2.20 
 -19   4   1   -0.90    2.00 
 -19   4   1    1.90    2.50 
  18  -4  -1    0.90    2.60 
  18  -4  -1   -0.30    2.50 
  18  -4  -1    1.00    1.60 
 -18   4   1    1.10    1.80 
 -18   4   1    1.50    2.10 
  17  -4  -1   -0.70    2.00 
  17  -4  -1   -1.20    1.50 
  17  -4  -1    0.30    2.00 
 -17   4   1   -1.00    1.70 
 -17   4   1    2.50    1.90 
  16  -4  -1    3.00    1.90 
  16  -4  -1    0.10    2.00 
  16  -4  -1    2.70    2.70 
 -16   4   1    5.60    2.20 
 -16   4   1    3.10    2.00 
  15  -4  -1   16.20    3.10 
  15  -4  -1   16.20    4.10 
  15  -4  -1   14.60    3.70 
 -15   4   1   21.90    3.60 
 -15   4   1   15.10    3.10 
  14  -4  -1    1.30    1.60 
  14  -4  -1    2.30    2.10 
  14  -4  -1   -0.20    1.70 
 -14   4   1   -0.50    1.30 
 -14   4   1    1.50    1.60 
  13  -4  -1   16.20    3.60 
  13  -4  -1   22.00    4.10 
  13  -4  -1   17.80    3.00 
 -13   4   1   19.30    3.20 
 -13   4   1   11.10    2.60 
  12  -4  -1   38.80    4.30 
  12  -4  -1   38.20    4.90 
  12  -4  -1   45.20    5.70 
 -12   4   1   40.70    4.50 
 -12   4   1   39.40    4.30 
  11  -4  -1    3.90    1.90 
  11  -4  -1    1.20    1.60 
  11  -4  -1    2.70    1.50 
 -11   4   1    1.20    1.30 
 -11   4   1    3.20    1.70 
 -11   4   1    3.80    1.60 
  10  -4  -1   99.69    4.70 
  10  -4  -1  103.29    6.60 
  10  -4  -1  100.79    6.20 
  10  -4  -1   89.59    5.50 
 -10   4   1  102.29    5.80 
 -10   4   1  101.69    5.80 
 -10   4   1   99.29    5.40 
   9  -4  -1    3.30    1.40 
   9  -4  -1    1.10    1.40 
   9  -4  -1    3.50    1.70 
   9  -4  -1    3.90    1.30 
  -9   4   1    1.90    1.60 
  -9   4   1    3.80    1.40 
  -9   4   1    1.00    1.10 
   8  -4  -1   27.00    3.50 
   8  -4  -1   29.50    3.50 
   8  -4  -1   25.10    3.50 
   8  -4  -1   29.70    2.90 
   8  -4  -1   30.50    3.50 
  -8   4   1   39.40    4.00 
  -8   4   1   29.20    3.40 
  -8   4   1   27.30    3.00 
   7  -4  -1  104.59    5.40 
   7  -4  -1  105.39    4.90 
   7  -4  -1  100.19    5.50 
   7  -4  -1  111.39    5.40 
   7  -4  -1  105.19    5.90 
  -7   4   1  106.09    5.40 
  -7   4   1  105.39    5.40 
  -7   4   1   92.89    4.80 
   6  -4  -1 1037.40   28.30 
   6  -4  -1  957.80   27.00 
   6  -4  -1 1004.10   28.10 
  -6   4   1  972.40   28.30 
  -6   4   1  945.21   27.20 
  -6   4   1  960.20   27.80 
   5  -4  -1   10.40    1.90 
   5  -4  -1   10.80    1.90 
   5  -4  -1   11.60    1.80 
   5  -4  -1   11.50    2.00 
   5  -4  -1   10.50    1.80 
  -5   4   1   10.90    1.90 
  -5   4   1    9.70    1.80 
  -5   4   1   10.50    1.70 
   4  -4  -1  344.57   11.50 
   4  -4  -1  342.87   11.10 
   4  -4  -1  347.77   11.60 
   4  -4  -1  355.96   11.30 
  -4   4   1  355.36   11.10 
  -4   4   1  351.56   11.70 
   3  -4  -1  233.38    8.30 
   3  -4  -1  246.38    7.90 
   3  -4  -1  233.68    8.00 
   3  -4  -1  221.38    8.20 
  -3   4   1  216.58    7.80 
  -3   4   1  231.78    8.20 
  -3   4   1  224.38    8.30 
   2  -4  -1  409.46   12.90 
   2  -4  -1  408.86   12.50 
   2  -4  -1  424.36   12.20 
   2  -4  -1  419.06   12.90 
  -2   4   1  413.06   12.40 
  -2   4   1  421.46   13.00 
   1  -4  -1    9.20    1.50 
   1  -4  -1   10.00    1.50 
   1  -4  -1   11.30    1.70 
   1  -4  -1   11.30    1.30 
  -1   4   1    7.50    1.40 
  -1   4   1   13.10    1.70 
  -1   4   1    7.90    1.40 
   0  -4  -1   18.90    2.00 
   0  -4  -1   17.80    2.00 
   0  -4  -1   14.40    1.70 
   0  -4  -1   17.20    1.20 
   0   4   1   20.80    1.60 
   0   4   1   18.60    2.00 
  -1  -4  -1    6.90    1.30 
  -1  -4  -1    5.40    0.70 
  -1  -4  -1    6.20    1.20 
  -1  -4  -1    4.80    1.00 
  -1  -4  -1    5.00    1.10 
   1   4   1    4.40    1.00 
   1   4   1    3.90    1.00 
   1   4   1    4.60    0.90 
  -2  -4  -1   59.09    2.70 
  -2  -4  -1   53.39    2.70 
  -2  -4  -1   52.39    2.70 
   2   4   1   61.29    2.80 
   2   4   1   57.39    2.20 
  -3  -4  -1   92.49    3.70 
  -3  -4  -1   91.09    3.40 
  -3  -4  -1   92.99    3.70 
   3   4   1   94.59    3.60 
  -4  -4  -1  134.09    4.20 
  -4  -4  -1  124.39    4.50 
  -4  -4  -1  136.19    4.40 
  -4  -4  -1  126.19    4.50 
   4   4   1  133.19    4.30 
  -5  -4  -1  261.77    7.70 
  -5  -4  -1  257.27    7.00 
  -5  -4  -1  258.77    7.00 
  -5  -4  -1  249.18    7.70 
   5   4   1  265.97    7.10 
  -6  -4  -1  219.88    6.60 
  -6  -4  -1  220.38    6.60 
   6   4   1  218.98    7.00 
   6   4   1  225.38    9.10 
  -7  -4  -1    8.10    0.90 
  -7  -4  -1    5.60    0.80 
   7   4   1    6.40    1.80 
   7   4   1    5.10    1.10 
  -8  -4  -1   12.20    1.10 
  -8  -4  -1   11.30    1.10 
   8   4   1    8.70    1.50 
   8   4   1   12.50    2.60 
  -9  -4  -1   67.39    2.60 
  -9  -4  -1   71.79    2.70 
   9   4   1   72.89    5.10 
   9   4   1   76.59    4.00 
 -10  -4  -1   58.69    2.30 
 -10  -4  -1   50.39    2.20 
  10   4   1   52.09    3.60 
  10   4   1   53.69    5.50 
 -11  -4  -1   66.59    2.60 
 -11  -4  -1   60.99    2.60 
  11   4   1   64.89    4.20 
  11   4   1   67.59    5.50 
 -12  -4  -1    4.40    0.90 
 -12  -4  -1    5.20    0.90 
  12   4   1    4.40    1.70 
  12   4   1    3.00    2.10 
 -13  -4  -1   22.30    1.60 
 -13  -4  -1   22.10    1.60 
  13   4   1   23.60    4.60 
  13   4   1   25.60    3.50 
 -14  -4  -1   24.50    1.80 
 -14  -4  -1   23.60    1.70 
  14   4   1   30.30    4.00 
  14   4   1   21.90    4.40 
 -15  -4  -1    9.80    1.30 
  15   4   1   10.90    3.50 
 -16  -4  -1    1.60    0.80 
  16   4   1    2.60    2.40 
 -17  -4  -1    4.40    1.10 
  17   4   1    1.80    2.90 
 -18  -4  -1    7.10    1.20 
  18   4   1    6.00    3.20 
 -19  -4  -1   22.70    1.80 
  19   4   1   16.00    4.70 
  18  -5  -1   17.00    4.70 
  18  -5  -1   18.00    5.00 
  18  -5  -1   17.50    3.70 
 -18   5   1   13.70    3.60 
 -18   5   1   13.70    3.50 
  17  -5  -1   14.20    3.20 
  17  -5  -1    7.20    3.40 
  17  -5  -1    3.70    2.60 
 -17   5   1    8.20    3.00 
 -17   5   1    6.90    2.80 
  16  -5  -1   12.80    3.10 
  16  -5  -1    4.40    2.90 
  16  -5  -1    8.10    3.00 
 -16   5   1   12.20    3.30 
 -16   5   1   21.80    3.90 
  15  -5  -1   37.80    5.90 
  15  -5  -1   37.90    4.90 
  15  -5  -1   25.60    4.90 
 -15   5   1   41.70    5.10 
 -15   5   1   36.00    4.90 
  14  -5  -1   15.80    4.00 
  14  -5  -1   16.60    4.00 
  14  -5  -1   14.10    3.20 
 -14   5   1   15.60    3.20 
 -14   5   1   18.30    3.60 
  13  -5  -1    6.10    2.40 
  13  -5  -1   12.20    3.20 
  13  -5  -1   11.90    3.40 
 -13   5   1    9.40    2.70 
 -13   5   1   10.10    2.50 
  12  -5  -1    1.10    1.70 
  12  -5  -1    2.70    1.80 
  12  -5  -1    2.40    1.80 
 -12   5   1    2.00    1.60 
 -12   5   1    0.90    1.60 
  11  -5  -1  134.39    7.30 
  11  -5  -1  130.89    7.90 
  11  -5  -1  125.59    7.60 
 -11   5   1  129.89    6.90 
 -11   5   1  117.59    7.00 
 -11   5   1  135.59    7.30 
  10  -5  -1  344.97   12.00 
  10  -5  -1  356.06   13.40 
  10  -5  -1  349.47   14.60 
  10  -5  -1  350.26   13.90 
 -10   5   1  348.17   13.20 
 -10   5   1  362.66   12.90 
 -10   5   1  363.66   13.60 
   9  -5  -1  127.49    6.00 
   9  -5  -1  138.19    7.10 
   9  -5  -1  122.19    6.90 
   9  -5  -1  123.69    7.20 
  -9   5   1  133.49    6.60 
  -9   5   1  127.89    6.80 
  -9   5   1  123.59    6.70 
   8  -5  -1    8.10    2.00 
   8  -5  -1    8.10    2.30 
   8  -5  -1   12.80    2.50 
   8  -5  -1    4.80    1.90 
   8  -5  -1    8.00    1.80 
  -8   5   1    6.50    1.80 
  -8   5   1    8.70    2.00 
  -8   5   1    9.10    2.10 
   7  -5  -1    1.00    1.00 
   7  -5  -1    3.70    1.40 
   7  -5  -1    2.40    1.40 
   7  -5  -1    1.30    1.20 
  -7   5   1    3.00    1.40 
  -7   5   1    1.00    1.20 
  -7   5   1    0.70    1.00 
   6  -5  -1  161.48    6.90 
   6  -5  -1  175.98    7.40 
   6  -5  -1  155.78    7.30 
   6  -5  -1  167.18    7.30 
  -6   5   1  154.88    6.90 
  -6   5   1  161.98    7.30 
  -6   5   1  174.58    7.60 
   5  -5  -1   60.29    4.00 
   5  -5  -1   55.99    3.90 
   5  -5  -1   48.40    3.60 
   5  -5  -1   49.10    3.40 
   5  -5  -1   49.00    3.40 
  -5   5   1   49.30    3.60 
  -5   5   1   51.29    3.40 
  -5   5   1   46.40    3.50 
   4  -5  -1   60.19    4.10 
   4  -5  -1   71.29    4.00 
   4  -5  -1   65.09    4.20 
   4  -5  -1   64.29    3.80 
   4  -5  -1   67.99    4.10 
  -4   5   1   78.89    4.40 
  -4   5   1   69.19    4.20 
  -4   5   1   70.89    3.90 
   3  -5  -1    6.30    1.40 
   3  -5  -1   10.10    2.00 
   3  -5  -1    7.70    1.80 
   3  -5  -1    8.40    1.80 
   3  -5  -1    6.10    1.50 
  -3   5   1    8.30    1.70 
  -3   5   1    6.00    1.40 
  -3   5   1    6.60    1.70 
   2  -5  -1  360.36   11.60 
   2  -5  -1  361.46   11.90 
   2  -5  -1  347.67   10.90 
   2  -5  -1  362.36   12.00 
  -2   5   1  352.96   11.80 
  -2   5   1  362.66   11.30 
  -2   5   1  362.46   12.00 
   1  -5  -1  208.88    7.50 
   1  -5  -1  213.58    7.80 
   1  -5  -1  210.18    6.70 
   1  -5  -1  209.38    7.70 
  -1   5   1  192.38    7.60 
  -1   5   1  202.18    7.20 
   0  -5  -1    6.30    1.50 
   0  -5  -1    4.70    1.30 
   0  -5  -1    6.50    1.00 
   0  -5  -1    5.40    1.40 
   0   5   1    4.80    1.10 
   0   5   1    6.90    1.40 
   0   5   1    4.50    1.20 
  -1  -5  -1  152.08    5.90 
  -1  -5  -1  147.89    5.60 
  -1  -5  -1  154.98    6.00 
  -1  -5  -1  152.28    4.50 
  -1  -5  -1  148.09    5.80 
   1   5   1  150.68    5.80 
   1   5   1  138.39    5.10 
   1   5   1  144.99    5.70 
  -2  -5  -1    1.30    0.90 
  -2  -5  -1    0.30    0.70 
  -2  -5  -1    0.60    0.90 
  -2  -5  -1   -0.40    0.60 
   2   5   1    0.90    0.60 
   2   5   1    0.30    0.70 
  -3  -5  -1  269.57    8.80 
  -3  -5  -1  272.97    8.40 
  -3  -5  -1  273.47    8.90 
   3   5   1  278.07    8.60 
  -4  -5  -1  444.76   13.10 
  -4  -5  -1  442.36   12.50 
  -4  -5  -1  432.36   13.00 
   4   5   1  453.35   12.60 
  -5  -5  -1   29.90    1.70 
  -5  -5  -1   31.10    2.00 
  -5  -5  -1   27.20    1.90 
   5   5   1   29.50    1.70 
  -6  -5  -1  109.99    4.20 
  -6  -5  -1  116.69    4.30 
  -6  -5  -1  107.69    3.70 
  -6  -5  -1  115.69    3.70 
   6   5   1  108.79    3.30 
   6   5   1  118.79    3.40 
  -7  -5  -1   31.40    1.40 
  -7  -5  -1   28.90    1.80 
  -7  -5  -1   30.30    1.40 
  -7  -5  -1   31.40    1.90 
  -8  -5  -1   25.50    1.60 
  -8  -5  -1   25.90    1.60 
   8   5   1   26.60    3.70 
  -9  -5  -1    0.70    0.50 
  -9  -5  -1    0.50    0.60 
   9   5   1    1.90    0.90 
   9   5   1    2.70    1.70 
 -10  -5  -1   10.80    1.10 
 -10  -5  -1   13.90    1.30 
  10   5   1    9.80    2.60 
  10   5   1   11.30    1.90 
 -11  -5  -1    2.80    0.70 
  11   5   1    4.60    1.50 
  11   5   1    0.50    1.60 
 -12  -5  -1  105.29    3.70 
 -12  -5  -1  111.19    3.70 
  12   5   1  112.29    7.70 
 -13  -5  -1   41.50    1.90 
 -13  -5  -1   37.80    1.80 
  13   5   1   37.60    5.60 
 -14  -5  -1   21.40    1.30 
 -14  -5  -1   22.00    1.30 
  14   5   1   20.90    4.50 
  15   5   1   13.50    3.90 
  16   5   1    0.70    2.40 
  17   5   1    7.10    3.80 
  18   5   1   -1.80    2.40 
  18  -6  -1    1.50    3.10 
  18  -6  -1    3.10    3.20 
  18  -6  -1    2.50    2.40 
 -18   6   1    7.20    3.10 
 -18   6   1    4.80    2.80 
  17  -6  -1   46.70    5.70 
  17  -6  -1   38.70    6.20 
  17  -6  -1   51.39    7.60 
 -17   6   1   37.70    5.60 
 -17   6   1   31.10    5.20 
  16  -6  -1   21.90    3.90 
  16  -6  -1   13.80    3.90 
  16  -6  -1   16.80    4.70 
 -16   6   1   15.00    3.70 
 -16   6   1   14.50    3.60 
  15  -6  -1    4.50    2.60 
  15  -6  -1    2.80    2.40 
  15  -6  -1   -0.10    1.60 
 -15   6   1    1.00    1.90 
 -15   6   1    3.40    2.10 
  14  -6  -1    5.00    2.40 
  14  -6  -1    2.10    2.20 
  14  -6  -1    6.50    2.40 
 -14   6   1    4.90    2.20 
 -14   6   1    2.00    2.10 
  13  -6  -1   18.50    4.10 
  13  -6  -1   17.50    3.50 
  13  -6  -1   13.70    3.40 
 -13   6   1   16.60    3.30 
 -13   6   1   15.10    3.30 
  12  -6  -1    0.10    1.80 
  12  -6  -1    2.80    2.00 
  12  -6  -1   -1.30    1.10 
 -12   6   1    1.30    1.70 
 -12   6   1    0.30    1.50 
  11  -6  -1   13.40    3.30 
  11  -6  -1   14.50    3.40 
  11  -6  -1    6.80    2.50 
 -11   6   1    5.80    2.40 
 -11   6   1   13.90    2.80 
 -11   6   1    9.30    2.60 
  10  -6  -1    0.00    1.10 
  10  -6  -1    0.10    1.70 
  10  -6  -1    1.40    1.70 
  10  -6  -1    1.30    1.60 
 -10   6   1    0.60    1.50 
 -10   6   1    2.60    1.70 
 -10   6   1    1.10    1.30 
   9  -6  -1    1.80    1.60 
   9  -6  -1    0.80    1.30 
   9  -6  -1    2.60    1.50 
   9  -6  -1    2.10    1.90 
  -9   6   1    0.20    1.40 
  -9   6   1    0.30    1.10 
  -9   6   1    0.40    1.30 
   8  -6  -1   36.00    4.30 
   8  -6  -1   41.80    4.20 
   8  -6  -1   41.70    4.50 
  -8   6   1   41.10    4.20 
  -8   6   1   45.10    4.70 
  -8   6   1   35.20    4.20 
   7  -6  -1   67.79    4.70 
   7  -6  -1   75.49    5.10 
   7  -6  -1   70.79    4.80 
   7  -6  -1   64.69    4.30 
  -7   6   1   63.49    4.70 
  -7   6   1   66.89    4.40 
  -7   6   1   77.69    5.00 
   6  -6  -1   75.09    4.60 
   6  -6  -1   63.99    4.50 
   6  -6  -1   73.29    4.50 
   6  -6  -1   71.69    4.90 
  -6   6   1   73.09    4.80 
  -6   6   1   81.89    4.70 
  -6   6   1   71.39    4.80 
   5  -6  -1   56.99    4.10 
   5  -6  -1   54.39    4.00 
   5  -6  -1   43.60    4.10 
   5  -6  -1   47.40    3.80 
   5  -6  -1   49.90    3.60 
  -5   6   1   48.50    3.80 
  -5   6   1   45.40    3.50 
  -5   6   1   54.29    4.00 
   4  -6  -1    5.00    1.80 
   4  -6  -1    8.30    1.80 
   4  -6  -1   11.90    2.40 
   4  -6  -1    5.60    1.60 
   4  -6  -1    6.80    1.80 
  -4   6   1    4.50    1.50 
  -4   6   1    7.50    1.70 
  -4   6   1    6.20    1.70 
   3  -6  -1    6.10    1.40 
   3  -6  -1    2.90    1.40 
   3  -6  -1    7.40    1.80 
   3  -6  -1    3.70    1.40 
   3  -6  -1    4.00    1.50 
  -3   6   1    7.70    1.60 
  -3   6   1    8.50    1.90 
  -3   6   1    7.70    1.80 
   2  -6  -1   92.79    4.80 
   2  -6  -1   92.59    4.90 
   2  -6  -1   93.09    4.20 
   2  -6  -1   94.59    5.10 
  -2   6   1   91.49    5.00 
  -2   6   1   86.69    4.90 
  -2   6   1   97.09    4.70 
   1  -6  -1   20.90    2.70 
   1  -6  -1   14.90    2.20 
   1  -6  -1   18.60    1.90 
   1  -6  -1   20.60    2.50 
  -1   6   1   23.60    2.80 
  -1   6   1   21.10    2.40 
  -1   6   1   21.50    2.70 
   0  -6  -1    1.50    0.70 
   0  -6  -1    2.90    1.20 
   0  -6  -1    1.70    1.10 
   0  -6  -1    2.80    1.20 
   0   6   1    2.00    1.10 
   0   6   1    2.00    1.00 
   0   6   1    2.60    1.20 
  -1  -6  -1    2.30    1.10 
  -1  -6  -1    3.20    1.30 
  -1  -6  -1    2.80    0.70 
  -1  -6  -1    1.50    1.00 
  -1  -6  -1    2.00    1.10 
   1   6   1    4.70    1.30 
   1   6   1    2.00    1.00 
   1   6   1    1.50    0.80 
  -2  -6  -1   73.49    3.90 
  -2  -6  -1   73.09    3.80 
  -2  -6  -1   75.09    4.00 
  -2  -6  -1   83.59    4.20 
   2   6   1   83.09    4.00 
   2   6   1   77.29    3.20 
  -3  -6  -1  261.07    9.00 
  -3  -6  -1  257.77    9.00 
  -3  -6  -1  259.97    8.70 
  -3  -6  -1  272.67    9.10 
   3   6   1  263.37    7.20 
   3   6   1  258.47    8.70 
  -4  -6  -1    2.30    0.90 
  -4  -6  -1    4.00    1.10 
  -4  -6  -1    1.80    1.00 
   4   6   1    4.40    1.10 
  -5  -6  -1   38.50    2.50 
  -5  -6  -1   37.10    2.30 
  -5  -6  -1   41.30    2.60 
   5   6   1   40.70    2.30 
  -6  -6  -1   17.20    1.70 
  -6  -6  -1   19.70    2.00 
  -6  -6  -1   18.60    1.90 
   6   6   1   17.80    1.50 
  -7  -6  -1    6.80    1.20 
  -7  -6  -1    8.00    1.20 
  -7  -6  -1    6.90    1.20 
  -8  -6  -1    0.50    0.60 
  -8  -6  -1   -0.30    0.60 
  -8  -6  -1    0.70    0.60 
  -9  -6  -1   40.00    2.30 
  -9  -6  -1   44.50    2.40 
 -10  -6  -1    3.10    0.80 
 -10  -6  -1    2.40    0.80 
 -11  -6  -1   39.50    2.10 
 -11  -6  -1   36.30    2.00 
 -12  -6  -1   70.19    2.70 
  12   6   1   64.49    7.00 
 -13  -6  -1   48.50    2.10 
  13   6   1   52.39    6.80 
  14   6   1   16.60    4.30 
  15   6   1   23.80    5.00 
  16   6   1   -1.20    2.20 
  17   6   1   -0.40    2.80 
  18   6   1    9.40    3.90 
  17  -7  -1   -1.20    2.00 
  17  -7  -1    1.10    2.70 
  17  -7  -1   -2.30    1.80 
 -17   7   1   -1.30    2.20 
 -17   7   1   -0.70    1.90 
  16  -7  -1    8.10    3.40 
  16  -7  -1   11.30    3.80 
  16  -7  -1    9.20    3.20 
 -16   7   1   16.40    4.00 
 -16   7   1   10.50    3.20 
  15  -7  -1   26.90    5.00 
  15  -7  -1   24.80    5.40 
  15  -7  -1   17.10    3.80 
 -15   7   1   19.10    4.10 
 -15   7   1   23.70    4.30 
  14  -7  -1    3.50    2.50 
  14  -7  -1    6.90    3.00 
  14  -7  -1   -0.80    1.80 
 -14   7   1    2.80    2.20 
 -14   7   1    4.10    2.60 
  13  -7  -1   41.50    5.90 
  13  -7  -1   41.00    5.40 
  13  -7  -1   36.80    5.60 
 -13   7   1   33.30    4.90 
 -13   7   1   40.40    5.70 
  12  -7  -1   42.00    5.50 
  12  -7  -1   24.20    4.30 
  12  -7  -1   39.70    5.80 
 -12   7   1   32.50    4.70 
 -12   7   1   43.80    5.50 
 -12   7   1   36.20    4.80 
  11  -7  -1   25.00    3.60 
  11  -7  -1   20.80    3.90 
  11  -7  -1   21.30    4.00 
  11  -7  -1   22.40    4.10 
 -11   7   1   26.50    4.00 
 -11   7   1   26.00    4.20 
 -11   7   1   23.60    4.10 
  10  -7  -1   -0.70    1.60 
  10  -7  -1    1.50    2.00 
  10  -7  -1    0.70    1.40 
  10  -7  -1   -0.70    1.60 
 -10   7   1    0.20    1.40 
 -10   7   1   -0.20    1.60 
 -10   7   1    1.10    1.70 
   9  -7  -1    3.10    1.70 
   9  -7  -1    1.90    2.00 
   9  -7  -1   -1.50    1.30 
   9  -7  -1    1.60    1.60 
  -9   7   1    2.50    1.60 
  -9   7   1   -0.70    1.70 
  -9   7   1   -0.70    1.30 
   8  -7  -1  100.59    6.70 
   8  -7  -1   96.09    6.20 
   8  -7  -1  105.19    6.00 
  -8   7   1  108.89    6.60 
  -8   7   1  105.19    6.70 
  -8   7   1  110.69    6.30 
   7  -7  -1   24.90    3.70 
   7  -7  -1   34.70    4.00 
   7  -7  -1   23.50    3.50 
   7  -7  -1   33.50    4.10 
  -7   7   1   32.90    4.20 
  -7   7   1   36.70    4.30 
  -7   7   1   33.70    4.30 
   6  -7  -1   91.19    5.80 
   6  -7  -1  100.79    5.60 
   6  -7  -1   98.59    6.20 
   6  -7  -1   98.99    5.60 
  -6   7   1   96.89    5.60 
  -6   7   1   94.79    5.90 
  -6   7   1   89.19    5.90 
   5  -7  -1   12.40    2.50 
   5  -7  -1   12.00    2.20 
   5  -7  -1    4.90    2.00 
   5  -7  -1   10.90    2.40 
  -5   7   1    6.60    2.10 
  -5   7   1    9.10    2.20 
  -5   7   1    7.50    1.90 
   4  -7  -1   69.19    4.20 
   4  -7  -1   66.79    4.70 
   4  -7  -1   68.69    4.60 
   4  -7  -1   70.29    4.90 
   4  -7  -1   80.49    5.10 
  -4   7   1   72.49    4.80 
  -4   7   1   76.09    4.90 
  -4   7   1   67.69    4.40 
   3  -7  -1   47.10    4.60 
   3  -7  -1   46.60    3.20 
   3  -7  -1   49.20    4.70 
   3  -7  -1   48.10    3.70 
   3  -7  -1   44.60    3.50 
  -3   7   1   47.90    3.90 
  -3   7   1   43.50    4.30 
  -3   7   1   53.49    3.70 
   2  -7  -1   11.70    1.80 
   2  -7  -1   15.00    2.60 
   2  -7  -1    8.80    2.20 
   2  -7  -1   12.90    2.40 
   2  -7  -1    9.80    2.10 
  -2   7   1   11.80    2.40 
  -2   7   1    8.80    2.00 
  -2   7   1   12.50    2.20 
   1  -7  -1   67.69    4.20 
   1  -7  -1   63.99    4.40 
   1  -7  -1   63.59    3.30 
   1  -7  -1   70.99    4.40 
   1  -7  -1   70.29    4.50 
  -1   7   1   70.59    4.40 
  -1   7   1   71.19    4.40 
  -1   7   1   64.99    3.80 
   0  -7  -1   -0.30    0.80 
   0  -7  -1   -0.70    0.90 
   0  -7  -1    0.40    0.70 
   0  -7  -1    0.10    1.00 
   0   7   1    0.80    0.90 
   0   7   1    0.70    0.80 
   0   7   1    0.60    0.90 
  -1  -7  -1   39.50    3.70 
  -1  -7  -1   39.20    3.80 
  -1  -7  -1   38.80    3.00 
  -1  -7  -1   38.20    3.10 
  -1  -7  -1   37.70    1.90 
   1   7   1   39.50    2.60 
   1   7   1   36.90    3.00 
   1   7   1   41.60    3.10 
  -2  -7  -1   40.00    3.70 
  -2  -7  -1   44.40    3.30 
  -2  -7  -1   36.30    2.90 
  -2  -7  -1   41.10    3.10 
   2   7   1   40.00    3.00 
   2   7   1   35.70    2.30 
  -3  -7  -1   39.40    3.70 
  -3  -7  -1   31.30    3.00 
  -3  -7  -1   29.80    3.00 
  -3  -7  -1   34.30    2.70 
   3   7   1   32.40    1.70 
   3   7   1   36.20    2.70 
  -4  -7  -1   12.70    2.10 
  -4  -7  -1   12.10    1.90 
  -4  -7  -1   11.50    1.80 
  -4  -7  -1   14.70    2.20 
   4   7   1   14.60    1.90 
  -5  -7  -1   14.80    1.90 
  -5  -7  -1   12.30    1.80 
  -5  -7  -1   11.80    1.90 
   5   7   1   16.70    2.00 
  -6  -7  -1   97.69    4.60 
  -6  -7  -1  100.59    4.70 
  -6  -7  -1  110.99    4.60 
   6   7   1  101.69    4.10 
  -7  -7  -1    1.40    0.90 
  -7  -7  -1    1.20    0.90 
  -7  -7  -1    0.20    0.70 
   7   7   1    0.00    0.50 
  -8  -7  -1   33.50    2.40 
  -8  -7  -1   36.50    2.50 
  -8  -7  -1   37.40    2.40 
  -9  -7  -1   10.60    1.50 
  -9  -7  -1   12.00    1.70 
 -10  -7  -1    7.40    1.30 
 -10  -7  -1    6.40    1.30 
 -11  -7  -1   -0.20    0.60 
 -11  -7  -1    0.10    0.70 
 -12  -7  -1    0.20    0.60 
 -13  -7  -1   16.80    1.30 
  16  -8  -1    5.20    2.80 
  16  -8  -1    5.50    2.90 
  16  -8  -1    1.90    2.40 
 -16   8   1    0.40    2.40 
 -16   8   1    4.40    2.80 
  15  -8  -1   36.60    5.70 
  15  -8  -1   33.40    6.00 
  15  -8  -1   30.10    5.50 
 -15   8   1   31.40    5.50 
 -15   8   1   33.00    5.20 
  14  -8  -1    5.10    2.90 
  14  -8  -1    4.70    2.50 
  14  -8  -1   11.90    3.80 
 -14   8   1    4.20    2.60 
 -14   8   1    3.80    2.50 
  13  -8  -1    4.60    2.40 
  13  -8  -1    3.80    2.50 
  13  -8  -1    1.30    2.20 
 -13   8   1    5.40    2.70 
 -13   8   1    6.30    2.80 
  12  -8  -1   -0.30    1.50 
  12  -8  -1   -1.20    1.80 
  12  -8  -1   -0.20    1.80 
 -12   8   1    1.00    1.90 
 -12   8   1    2.40    2.00 
 -12   8   1   -0.40    1.60 
  11  -8  -1    5.00    2.20 
  11  -8  -1    1.10    1.90 
  11  -8  -1    5.30    2.80 
  11  -8  -1    6.50    2.80 
 -11   8   1    1.20    1.70 
 -11   8   1    2.60    1.80 
 -11   8   1    3.90    2.30 
  10  -8  -1   19.60    3.70 
  10  -8  -1   26.70    4.60 
  10  -8  -1   30.10    4.90 
  10  -8  -1   24.60    3.80 
 -10   8   1   30.90    4.70 
 -10   8   1   21.40    3.80 
 -10   8   1   27.80    4.40 
   9  -8  -1   25.10    4.00 
   9  -8  -1   20.30    3.70 
   9  -8  -1   28.60    3.90 
  -9   8   1   20.80    3.70 
  -9   8   1   23.10    4.00 
  -9   8   1   29.80    4.10 
   8  -8  -1    9.50    2.70 
   8  -8  -1   18.20    3.10 
   8  -8  -1   16.20    3.50 
  -8   8   1   15.70    3.00 
  -8   8   1    9.20    2.90 
  -8   8   1   10.60    2.90 
   7  -8  -1   -0.10    1.40 
   7  -8  -1   -1.90    1.30 
   7  -8  -1   -0.90    1.30 
  -7   8   1    1.80    1.50 
  -7   8   1    0.30    1.50 
  -7   8   1   -0.70    1.20 
   6  -8  -1   39.80    4.60 
   6  -8  -1   32.60    4.20 
   6  -8  -1   46.70    5.40 
   6  -8  -1   32.10    3.90 
  -6   8   1   32.50    4.00 
  -6   8   1   40.20    4.80 
  -6   8   1   29.60    4.20 
   5  -8  -1   10.10    2.50 
   5  -8  -1    5.70    2.20 
   5  -8  -1   16.60    2.70 
   5  -8  -1    6.50    2.10 
  -5   8   1    9.80    2.50 
  -5   8   1   11.30    2.40 
  -5   8   1    9.70    2.60 
   4  -8  -1   70.09    5.10 
   4  -8  -1   70.09    4.90 
   4  -8  -1   62.29    4.90 
   4  -8  -1   66.79    4.30 
  -4   8   1   67.89    5.00 
  -4   8   1   70.99    5.10 
  -4   8   1   64.59    4.50 
   3  -8  -1   62.79    4.80 
   3  -8  -1   65.59    4.80 
   3  -8  -1   55.49    3.70 
   3  -8  -1   56.19    4.30 
   3  -8  -1   61.99    4.60 
  -3   8   1   60.29    4.10 
  -3   8   1   67.89    4.80 
  -3   8   1   58.19    5.40 
   2  -8  -1  209.78    9.60 
   2  -8  -1  227.18    8.20 
   2  -8  -1  211.88    9.40 
   2  -8  -1  228.78    9.90 
   2  -8  -1  237.68    9.50 
  -2   8   1  238.58    9.80 
  -2   8   1  232.38    9.00 
  -2   8   1  226.98    9.60 
   1  -8  -1  130.49    6.70 
   1  -8  -1  145.09    7.30 
   1  -8  -1  139.09    7.00 
   1  -8  -1  158.48    5.80 
   1  -8  -1  150.68    7.40 
  -1   8   1  140.69    7.00 
  -1   8   1  145.59    6.40 
   0  -8  -1  276.77   10.70 
   0  -8  -1  259.87   10.10 
   0  -8  -1  254.77   10.40 
   0  -8  -1  273.17    8.40 
   0  -8  -1  261.97   10.70 
   0   8   1  263.17    9.40 
   0   8   1  277.37   10.40 
  -1  -8  -1   26.40    3.20 
  -1  -8  -1   25.80    3.20 
  -1  -8  -1   29.40    3.60 
  -1  -8  -1   25.80    3.40 
   1   8   1   27.40    3.20 
   1   8   1   32.10    2.50 
  -2  -8  -1    4.90    1.50 
  -2  -8  -1    7.70    1.70 
  -2  -8  -1    9.10    2.40 
  -2  -8  -1    8.00    2.10 
   2   8   1    8.80    1.90 
   2   8   1    5.60    1.20 
  -3  -8  -1   34.10    3.40 
  -3  -8  -1   34.70    3.60 
  -3  -8  -1   35.50    3.80 
   3   8   1   31.30    3.20 
  -4  -8  -1    0.60    1.00 
  -4  -8  -1    1.60    1.00 
   4   8   1   -0.50    0.80 
  -5  -8  -1   59.59    3.90 
  -5  -8  -1   66.79    3.90 
   5   8   1   63.29    3.60 
  -6  -8  -1   30.90    3.00 
  -6  -8  -1   25.30    2.80 
   6   8   1   29.90    2.30 
  -7  -8  -1    2.00    1.10 
  -7  -8  -1    1.80    1.10 
   7   8   1    2.60    0.90 
  -8  -8  -1   16.10    2.10 
  -8  -8  -1   17.10    2.20 
  -9  -8  -1   12.70    1.90 
 -10  -8  -1   20.90    2.20 
 -11  -8  -1   35.70    2.50 
 -12  -8  -1  109.19    4.40 
 -13  -8  -1   10.20    1.30 
  16  -9  -1    1.20    2.70 
  16  -9  -1   -0.70    2.60 
  16  -9  -1    5.30    3.20 
 -16   9   1    1.30    2.40 
 -16   9   1    3.80    3.20 
  15  -9  -1    3.70    3.00 
  15  -9  -1   -0.50    2.00 
  15  -9  -1    1.80    2.70 
 -15   9   1    4.20    2.80 
 -15   9   1   -1.70    2.30 
  14  -9  -1    3.30    2.80 
  14  -9  -1    2.50    2.60 
  14  -9  -1    2.90    2.70 
 -14   9   1    4.90    3.00 
 -14   9   1    5.50    2.70 
  13  -9  -1   21.30    4.30 
  13  -9  -1   21.30    4.70 
  13  -9  -1   27.00    5.20 
 -13   9   1   27.80    5.20 
 -13   9   1   16.20    3.70 
  12  -9  -1    1.50    2.30 
  12  -9  -1    0.20    1.90 
  12  -9  -1    1.60    2.30 
 -12   9   1   -0.90    1.40 
 -12   9   1    1.30    2.00 
 -12   9   1    1.90    2.30 
  11  -9  -1    3.50    2.20 
  11  -9  -1    2.60    2.50 
  11  -9  -1    2.90    2.60 
  11  -9  -1    5.30    2.90 
 -11   9   1    4.50    2.40 
 -11   9   1    4.20    2.40 
 -11   9   1    2.20    2.50 
  10  -9  -1   12.00    3.50 
  10  -9  -1   13.00    3.10 
  10  -9  -1    8.10    3.20 
  10  -9  -1   18.00    3.90 
 -10   9   1   11.20    3.30 
 -10   9   1   18.20    3.70 
 -10   9   1   10.80    2.80 
   9  -9  -1   -3.50    1.40 
   9  -9  -1    0.80    1.90 
   9  -9  -1    2.40    1.90 
  -9   9   1   -2.70    1.40 
  -9   9   1    0.80    1.50 
  -9   9   1    0.70    1.60 
   8  -9  -1   30.30    4.30 
   8  -9  -1   35.90    4.60 
   8  -9  -1   28.20    4.80 
  -8   9   1   27.50    4.40 
  -8   9   1   29.30    4.60 
  -8   9   1   37.70    4.80 
   7  -9  -1   29.30    4.00 
   7  -9  -1   28.40    4.20 
   7  -9  -1   32.70    5.00 
  -7   9   1   33.10    4.40 
  -7   9   1   25.60    4.30 
  -7   9   1   24.50    4.10 
   6  -9  -1   45.20    4.70 
   6  -9  -1   44.80    5.30 
   6  -9  -1   49.50    5.20 
   6  -9  -1   45.90    5.60 
  -6   9   1   44.30    4.80 
  -6   9   1   41.90    5.10 
   5  -9  -1   53.29    4.10 
   5  -9  -1   62.59    5.90 
   5  -9  -1   50.79    5.80 
   5  -9  -1   62.99    6.20 
  -5   9   1   40.50    5.00 
  -5   9   1   48.20    5.00 
   4  -9  -1   32.50    3.60 
   4  -9  -1   30.20    4.40 
   4  -9  -1   32.50    4.80 
   4  -9  -1   31.30    4.10 
  -4   9   1   32.00    4.40 
  -4   9   1   24.50    3.50 
   3  -9  -1   45.00    5.30 
   3  -9  -1   39.60    3.80 
   3  -9  -1   43.60    4.70 
   3  -9  -1   39.70    4.70 
  -3   9   1   43.50    4.60 
  -3   9   1   46.70    4.90 
   2  -9  -1   23.00    3.70 
   2  -9  -1   21.00    3.30 
   2  -9  -1   17.30    3.10 
   2  -9  -1   16.50    3.20 
   2  -9  -1   18.10    2.40 
  -2   9   1   18.90    3.00 
  -2   9   1   19.90    3.30 
   1  -9  -1    9.90    2.20 
   1  -9  -1    4.60    2.10 
   1  -9  -1    6.40    2.30 
   1  -9  -1   12.00    2.60 
  -1   9   1    4.40    1.60 
  -1   9   1    9.70    2.50 
   0  -9  -1   -1.10    0.90 
   0  -9  -1    0.80    1.60 
   0  -9  -1    1.10    1.60 
   0  -9  -1    0.30    1.20 
   0   9   1   -0.30    1.00 
   0   9   1    1.60    1.20 
  -1  -9  -1    1.40    1.50 
  -1  -9  -1    3.50    1.80 
  -1  -9  -1    0.40    1.30 
  -1  -9  -1   -1.00    0.90 
   1   9   1    1.10    1.30 
   1   9   1    0.00    0.90 
  -2  -9  -1  105.89    6.20 
  -2  -9  -1  105.49    5.70 
  -2  -9  -1   96.59    6.00 
  -2  -9  -1  100.09    5.80 
   2   9   1   98.19    5.50 
  -3  -9  -1    1.70    1.20 
  -3  -9  -1    4.60    1.80 
   3   9   1    2.10    1.30 
  -4  -9  -1   60.49    4.20 
  -4  -9  -1   66.49    4.30 
   4   9   1   64.59    4.10 
  -5  -9  -1    2.60    1.40 
  -5  -9  -1    0.80    1.20 
   5   9   1    1.60    1.10 
  -6  -9  -1   17.40    2.60 
  -6  -9  -1   14.40    2.40 
   6   9   1   16.40    2.20 
  -7  -9  -1    8.40    1.80 
  -7  -9  -1    6.60    1.80 
   7   9   1    6.60    1.30 
  -8  -9  -1   44.00    3.30 
  -8  -9  -1   42.70    3.30 
  -9  -9  -1    2.10    1.20 
 -10  -9  -1   10.60    1.90 
 -11  -9  -1    8.10    1.60 
 -12  -9  -1    2.90    1.00 
 -13  -9  -1   24.90    2.30 
 -14  -9  -1    0.50    0.60 
  15 -10  -1   19.70    5.40 
  15 -10  -1   14.20    4.60 
  15 -10  -1   11.20    4.10 
 -15  10   1   15.20    4.20 
  14 -10  -1    0.80    2.30 
  14 -10  -1    1.70    2.70 
  14 -10  -1    1.20    2.50 
 -14  10   1   -0.70    1.90 
  13 -10  -1    5.50    3.20 
  13 -10  -1    9.70    3.70 
  13 -10  -1   10.20    4.00 
 -13  10   1    3.80    2.60 
 -13  10   1    7.00    3.30 
  12 -10  -1    6.60    3.00 
  12 -10  -1   10.30    3.80 
  12 -10  -1   11.90    3.60 
 -12  10   1   12.80    3.90 
 -12  10   1   11.90    3.60 
  11 -10  -1    1.10    2.30 
  11 -10  -1   -1.40    2.30 
  11 -10  -1    0.90    2.10 
  11 -10  -1    0.30    2.00 
 -11  10   1    2.20    2.00 
 -11  10   1   -0.70    1.90 
  10 -10  -1   39.20    5.20 
  10 -10  -1   20.60    4.60 
  10 -10  -1   34.90    5.00 
 -10  10   1   36.70    5.60 
 -10  10   1   31.40    4.80 
   9 -10  -1   13.90    3.70 
   9 -10  -1   14.10    3.40 
   9 -10  -1   16.10    3.70 
  -9  10   1   11.50    3.10 
  -9  10   1   13.50    3.80 
   8 -10  -1   28.60    4.30 
   8 -10  -1   28.00    4.40 
   8 -10  -1   22.00    4.60 
  -8  10   1   23.00    4.20 
  -8  10   1   16.40    3.40 
   7 -10  -1   12.20    3.40 
   7 -10  -1    7.80    2.50 
   7 -10  -1   16.00    3.30 
  -7  10   1   20.30    4.10 
  -7  10   1   10.50    2.80 
   6 -10  -1    6.00    2.20 
   6 -10  -1    6.30    2.60 
   6 -10  -1    7.30    2.60 
  -6  10   1    5.90    2.30 
  -6  10   1    5.90    2.60 
   5 -10  -1    0.50    1.80 
   5 -10  -1   -1.60    1.50 
   5 -10  -1   -0.40    1.70 
   5 -10  -1   -1.30    1.30 
  -5  10   1   -0.60    1.80 
  -5  10   1   -1.70    1.30 
   4 -10  -1   69.19    6.80 
   4 -10  -1   63.49    6.10 
   4 -10  -1   63.89    4.40 
   4 -10  -1   56.39    6.20 
  -4  10   1   63.89    4.90 
  -4  10   1   52.09    5.90 
   3 -10  -1  152.88    8.80 
   3 -10  -1  152.88    8.50 
   3 -10  -1  147.29    8.10 
  -3  10   1  162.68    7.80 
  -3  10   1  154.08    8.40 
   2 -10  -1    0.40    1.40 
   2 -10  -1   -0.50    1.70 
   2 -10  -1   -0.40    1.20 
  -2  10   1    0.30    1.60 
  -2  10   1    1.20    1.40 
   1 -10  -1   93.69    6.30 
   1 -10  -1   91.69    6.10 
   1 -10  -1   84.29    6.10 
  -1  10   1   88.89    6.10 
  -1  10   1   99.99    5.60 
   0 -10  -1   10.10    2.80 
   0 -10  -1    7.40    2.50 
   0 -10  -1    3.60    1.90 
   0 -10  -1    4.10    1.80 
   0  10   1    5.40    2.10 
  -1 -10  -1  156.28    7.90 
  -1 -10  -1  158.58    8.00 
   1  10   1  143.59    7.50 
  -2 -10  -1   32.40    4.10 
  -2 -10  -1   34.00    4.00 
   2  10   1   29.70    3.70 
  -3 -10  -1    2.20    1.60 
  -3 -10  -1    0.90    1.40 
   3  10   1    3.20    1.60 
  -4 -10  -1   -0.50    1.00 
  -4 -10  -1    2.20    1.50 
   4  10   1    2.20    1.30 
  -5 -10  -1    2.30    1.40 
  -5 -10  -1    0.80    1.40 
   5  10   1    3.20    1.60 
  -6 -10  -1    9.70    2.20 
  -6 -10  -1    8.30    2.20 
   6  10   1   11.10    2.00 
  -7 -10  -1    0.50    1.40 
  -7 -10  -1   -1.20    0.90 
   7  10   1    0.40    0.90 
  -8 -10  -1    9.40    2.10 
  -8 -10  -1   13.70    2.50 
  -9 -10  -1   22.90    2.90 
 -10 -10  -1   25.80    2.90 
 -11 -10  -1    1.20    1.10 
 -12 -10  -1   69.79    4.00 
 -13 -10  -1    6.60    1.50 
 -14 -10  -1   18.60    1.90 
  13 -11  -1    8.70    3.70 
  13 -11  -1    4.00    3.40 
  13 -11  -1   16.80    4.80 
 -13  11   1   15.20    4.30 
 -13  11   1   14.10    4.40 
  12 -11  -1    4.20    3.30 
  12 -11  -1    6.60    2.80 
  12 -11  -1    6.40    3.50 
 -12  11   1    8.00    3.80 
 -12  11   1    5.70    3.20 
  11 -11  -1   13.70    3.80 
  11 -11  -1   12.20    3.90 
  11 -11  -1   18.30    3.90 
  11 -11  -1   14.60    4.30 
 -11  11   1   15.80    4.10 
 -11  11   1   20.20    4.60 
  10 -11  -1    3.50    2.40 
  10 -11  -1    6.00    2.80 
  10 -11  -1    3.80    2.50 
 -10  11   1    2.30    2.50 
 -10  11   1    0.70    2.10 
   9 -11  -1   11.70    3.20 
   9 -11  -1   14.50    3.70 
   9 -11  -1   10.60    3.70 
  -9  11   1    7.60    2.90 
  -9  11   1   12.20    3.50 
   8 -11  -1   25.70    4.40 
   8 -11  -1   26.90    4.30 
   8 -11  -1   22.70    4.70 
  -8  11   1   21.70    4.30 
  -8  11   1   32.80    5.20 
   7 -11  -1    3.80    2.70 
   7 -11  -1    8.30    2.70 
   7 -11  -1    6.30    2.70 
  -7  11   1    6.50    2.70 
  -7  11   1    5.40    2.60 
   6 -11  -1   12.30    3.50 
   6 -11  -1   20.60    4.00 
  -6  11   1   13.90    3.30 
  -6  11   1   26.60    4.70 
   5 -11  -1   24.10    4.70 
   5 -11  -1   35.20    5.10 
   5 -11  -1   32.40    5.10 
  -5  11   1   28.50    4.30 
  -5  11   1   24.50    4.20 
   4 -11  -1   22.30    4.50 
   4 -11  -1   13.60    3.30 
   4 -11  -1   20.60    3.70 
  -4  11   1   20.80    3.60 
  -4  11   1   16.60    3.60 
   3 -11  -1   48.10    6.10 
   3 -11  -1   35.40    4.90 
   3 -11  -1   37.00    5.00 
  -3  11   1   38.10    4.50 
  -3  11   1   36.40    4.80 
   2 -11  -1   -1.20    1.30 
   2 -11  -1   -0.50    1.30 
   2 -11  -1    2.70    2.20 
  -2  11   1   -0.80    1.30 
  -2  11   1   -1.70    1.30 
   1 -11  -1   10.50    2.90 
   1 -11  -1   10.80    2.90 
   1 -11  -1   12.20    3.20 
  -1  11   1    8.70    2.40 
   0 -11  -1   42.40    5.00 
   0 -11  -1   36.40    4.70 
   0  11   1   31.80    4.40 
  -1 -11  -1   72.39    5.50 
  -1 -11  -1   71.99    5.50 
   1  11   1   78.29    5.60 
  -2 -11  -1   36.70    4.60 
  -2 -11  -1   31.60    4.30 
   2  11   1   23.60    3.60 
  -3 -11  -1   18.30    3.10 
  -3 -11  -1   14.50    3.00 
   3  11   1   18.40    3.10 
  -4 -11  -1   15.60    3.10 
  -4 -11  -1   22.90    3.40 
   4  11   1   18.90    3.00 
  -5 -11  -1    0.80    1.40 
  -5 -11  -1    1.00    1.30 
   5  11   1    0.60    1.30 
  -6 -11  -1   54.39    5.20 
  -6 -11  -1   51.69    5.00 
   6  11   1   62.19    4.10 
  -7 -11  -1    3.60    1.50 
  -7 -11  -1   -0.80    1.40 
   7  11   1    0.70    1.20 
  -8 -11  -1   14.10    2.60 
  -8 -11  -1   21.20    3.30 
  -9 -11  -1    0.10    1.20 
 -10 -11  -1   34.40    3.80 
 -11 -11  -1   45.30    3.70 
 -12 -11  -1   -0.70    1.10 
 -13 -11  -1   54.19    3.70 
  12 -12  -1   -1.30    2.60 
  12 -12  -1   -1.30    2.20 
  12 -12  -1    0.10    2.70 
 -12  12   1    1.80    2.50 
 -12  12   1   -2.40    2.50 
  11 -12  -1    9.20    3.60 
  11 -12  -1   12.80    3.90 
  11 -12  -1    5.10    3.30 
 -11  12   1   14.60    4.70 
 -11  12   1   12.40    3.70 
  10 -12  -1    9.10    3.50 
  10 -12  -1   14.90    4.00 
  10 -12  -1    8.30    3.20 
 -10  12   1   12.30    3.60 
 -10  12   1    9.90    3.80 
   9 -12  -1   -0.10    2.30 
   9 -12  -1   -1.80    1.80 
  -9  12   1    0.30    2.20 
  -9  12   1   -1.00    1.70 
   8 -12  -1   -0.60    2.30 
   8 -12  -1    1.20    2.10 
  -8  12   1    3.10    2.40 
  -8  12   1    1.50    1.90 
   7 -12  -1   57.49    7.40 
   7 -12  -1   56.99    6.60 
  -7  12   1   57.49    7.20 
  -7  12   1   57.99    6.60 
   6 -12  -1   15.20    3.80 
   6 -12  -1   16.40    4.10 
  -6  12   1   11.00    3.50 
  -6  12   1   10.90    3.30 
   5 -12  -1   -0.50    1.70 
   5 -12  -1   -0.50    2.00 
  -5  12   1   -0.80    2.00 
  -5  12   1   -0.80    1.60 
   4 -12  -1   51.49    6.00 
   4 -12  -1   58.59    6.90 
   4 -12  -1   67.39    7.80 
  -4  12   1   51.09    6.40 
  -4  12   1   51.19    5.70 
   3 -12  -1    3.30    2.20 
   3 -12  -1    8.60    3.30 
   3 -12  -1    9.90    3.00 
  -3  12   1   12.20    3.20 
   2 -12  -1    2.90    2.40 
   2 -12  -1    8.10    2.90 
   2 -12  -1    8.90    3.10 
  -2  12   1    5.20    2.50 
   1 -12  -1  100.39    7.10 
   1 -12  -1   98.39    7.00 
  -1  12   1   87.99    6.60 
   0 -12  -1    4.00    2.20 
   0 -12  -1    5.20    2.20 
   0  12   1    2.80    1.90 
  -1 -12  -1   60.99    6.40 
  -1 -12  -1   62.49    6.40 
   1  12   1   54.09    5.90 
  -2 -12  -1    2.20    2.00 
  -2 -12  -1    0.80    1.90 
   2  12   1    2.50    1.80 
  -3 -12  -1   12.90    3.00 
  -3 -12  -1   13.60    3.20 
   3  12   1   17.00    3.30 
  -4 -12  -1    3.80    2.10 
  -4 -12  -1    3.70    2.00 
   4  12   1    5.40    2.10 
  -5 -12  -1    3.30    1.90 
  -5 -12  -1    1.50    1.80 
   5  12   1    0.30    1.40 
  -6 -12  -1   33.30    4.40 
  -6 -12  -1   32.30    4.40 
   6  12   1   37.00    3.90 
  -7 -12  -1    8.00    2.40 
  -7 -12  -1   10.80    2.80 
  -8 -12  -1   12.80    2.80 
  -8 -12  -1    9.80    2.80 
  -9 -12  -1   17.90    3.10 
 -10 -12  -1   -1.20    1.30 
 -11 -12  -1    2.40    1.60 
 -12 -12  -1    1.60    1.40 
  10 -13  -1   -0.80    2.90 
  10 -13  -1    0.80    2.60 
 -10  13   1    0.70    2.70 
 -10  13   1   -1.20    2.50 
   9 -13  -1   30.40    6.20 
   9 -13  -1   31.50    5.70 
  -9  13   1   24.70    5.30 
  -9  13   1   27.00    5.30 
   8 -13  -1   57.49    8.00 
   8 -13  -1   56.29    7.40 
  -8  13   1   52.59    6.90 
  -8  13   1   42.10    6.40 
   7 -13  -1    0.80    2.50 
   7 -13  -1    2.70    2.60 
  -7  13   1    4.50    2.70 
  -7  13   1    2.60    2.70 
   6 -13  -1   33.00    6.20 
   6 -13  -1   42.90    6.20 
  -6  13   1   42.80    5.90 
  -6  13   1   59.29    7.50 
   5 -13  -1    8.60    3.50 
   5 -13  -1    5.00    2.70 
  -5  13   1    5.90    3.10 
   4 -13  -1    3.00    2.30 
   4 -13  -1    6.00    3.40 
  -4  13   1    5.60    3.00 
   3 -13  -1   26.90    5.50 
   3 -13  -1   27.60    4.80 
   3 -13  -1   32.40    5.40 
  -3  13   1   23.00    4.50 
   2 -13  -1   13.00    3.60 
   2 -13  -1   21.80    4.70 
  -2  13   1    7.00    2.90 
   1 -13  -1    0.60    2.00 
   1 -13  -1    0.30    2.00 
  -1  13   1   -1.00    1.80 
   0 -13  -1   22.30    4.20 
   0 -13  -1   24.80    4.50 
   0  13   1   20.50    4.10 
  -1 -13  -1    1.20    2.00 
  -1 -13  -1   -0.50    1.80 
   1  13   1   -0.20    1.60 
  -2 -13  -1   31.50    4.90 
  -2 -13  -1   21.60    4.10 
   2  13   1   27.20    4.30 
  -3 -13  -1    1.80    1.90 
  -3 -13  -1    1.60    2.00 
   3  13   1   -0.20    1.50 
  -4 -13  -1    7.70    2.50 
  -4 -13  -1    5.20    2.60 
   4  13   1    6.70    2.40 
  -5 -13  -1    0.90    2.00 
  -5 -13  -1    0.50    1.70 
   5  13   1    2.10    1.80 
  -6 -13  -1   13.60    3.10 
  -6 -13  -1   22.70    3.90 
   6  13   1   16.00    2.90 
  -7 -13  -1    0.50    1.60 
  -7 -13  -1    1.60    2.30 
  -8 -13  -1   39.60    5.10 
  -8 -13  -1   38.50    4.70 
  -9 -13  -1   25.30    3.90 
 -10 -13  -1   70.89    5.40 
   7 -14  -1    6.30    4.00 
   7 -14  -1    7.60    3.30 
  -7  14   1    9.60    3.80 
   6 -14  -1   28.60    5.50 
   6 -14  -1   24.10    5.80 
  -6  14   1   27.60    5.30 
   5 -14  -1   29.50    6.00 
   5 -14  -1   27.50    5.40 
  -5  14   1   13.50    4.10 
   4 -14  -1   70.39    7.90 
  -4  14   1   74.09    8.20 
   3 -14  -1    0.10    2.00 
   3 -14  -1   -1.40    1.50 
  -3  14   1   -1.20    1.60 
   2 -14  -1    1.20    2.30 
   2 -14  -1    2.10    2.50 
  -2  14   1    3.20    2.50 
   1 -14  -1   -1.40    1.90 
   1 -14  -1    0.40    2.00 
  -1  14   1   -0.70    1.70 
   0 -14  -1    2.00    2.30 
   0 -14  -1    2.10    2.40 
   0  14   1    4.20    2.30 
  -1 -14  -1    9.00    3.40 
  -1 -14  -1    8.80    3.20 
   1  14   1    8.40    3.00 
  -2 -14  -1    7.50    3.00 
  -2 -14  -1    4.60    2.90 
   2  14   1    8.80    3.00 
  -3 -14  -1    3.40    2.50 
  -3 -14  -1   -1.30    2.00 
   3  14   1    1.30    2.00 
  -4 -14  -1   -0.20    2.10 
  -4 -14  -1   -0.20    1.90 
   4  14   1    0.50    1.80 
  -5 -14  -1    6.90    3.00 
  -5 -14  -1   12.00    3.40 
   5  14   1    9.10    2.70 
  -6 -14  -1   10.20    3.30 
  -6 -14  -1   11.50    3.20 
  -7 -14  -1    4.00    2.70 
  -7 -14  -1    2.90    2.00 
   3 -15  -1   37.90    5.90 
  -3  15   1   36.50    5.90 
   2 -15  -1   27.00    5.50 
   2 -15  -1   39.10    6.50 
  -2  15   1   22.80    4.80 
   1 -15  -1   11.90    4.00 
   1 -15  -1   14.20    4.00 
  -1  15   1   27.20    5.00 
   0 -15  -1   28.70    5.30 
   0 -15  -1   17.20    4.40 
   0  15   1   25.00    4.70 
  -1 -15  -1    6.40    3.00 
  -1 -15  -1    6.00    3.20 
   1  15   1   -0.50    2.00 
  -2 -15  -1   -1.60    1.90 
  -2 -15  -1   -1.60    2.40 
   2  15   1    0.40    1.90 
  -3 -15  -1   36.80    5.80 
   3  15   1   28.10    4.60 
  -3 -15   2   -2.00    2.20 
   2  15  -2    5.40    2.60 
  -2 -15   2    4.00    2.90 
  -2 -15   2    1.80    2.80 
   1  15  -2   18.00    4.10 
  -1 -15   2   17.60    4.20 
  -1 -15   2   25.40    5.00 
   0  15  -2    0.70    2.20 
   0 -15   2    3.50    3.00 
   0 -15   2   -2.00    2.10 
  -1  15  -2   -1.70    2.00 
   1 -15   2   -0.30    2.40 
   1 -15   2   -0.40    2.40 
  -2  15  -2   -1.40    2.20 
   2 -15   2    2.30    2.90 
   2 -15   2    1.60    2.40 
  -7 -14   2    3.70    2.40 
  -7 -14   2    3.20    2.60 
  -6 -14   2    5.30    2.60 
  -6 -14   2    7.20    2.80 
   5  14  -2   -0.20    1.50 
  -5 -14   2    0.00    2.10 
  -5 -14   2    0.80    1.80 
   4  14  -2    8.70    2.90 
  -4 -14   2    9.20    3.00 
  -4 -14   2    9.00    3.20 
   3  14  -2   -1.80    1.40 
  -3 -14   2   -0.60    2.00 
  -3 -14   2   -0.30    1.80 
   2  14  -2   96.49    6.90 
  -2 -14   2   75.89    7.90 
  -2 -14   2   86.09    8.20 
   1  14  -2   -3.00    1.50 
  -1 -14   2    6.80    3.00 
  -1 -14   2   -1.00    1.90 
   0  14  -2   -0.40    1.90 
   0 -14   2    1.90    2.30 
   0 -14   2   -1.00    2.00 
  -1  14  -2   34.30    5.30 
   1 -14   2   32.60    5.30 
   1 -14   2   34.80    5.80 
  -2  14  -2   18.80    4.10 
   2 -14   2   17.20    4.60 
   2 -14   2   12.40    3.80 
  -3  14  -2    1.20    2.10 
   3 -14   2    3.20    2.80 
   3 -14   2    1.20    2.30 
  -4  14  -2    8.30    3.40 
   4 -14   2   11.30    3.50 
  -5  14  -2    4.90    2.90 
   5 -14   2   -1.30    2.70 
   5 -14   2    6.20    3.30 
  -6  14  -2   10.30    3.90 
   6 -14   2    7.70    3.60 
   6 -14   2   14.70    4.50 
  -7  14  -2   -1.50    1.90 
   7 -14   2   -0.30    2.20 
   7 -14   2   -2.40    2.70 
 -10 -13   2   40.20    4.70 
  -9 -13   2   33.90    4.40 
  -8 -13   2    7.20    2.40 
  -8 -13   2    9.60    3.30 
  -7 -13   2    0.10    2.00 
  -7 -13   2    2.10    1.90 
   6  13  -2    1.90    1.60 
  -6 -13   2    0.70    1.90 
  -6 -13   2    2.20    1.80 
   5  13  -2    3.40    1.80 
  -5 -13   2    7.60    2.50 
  -5 -13   2    4.30    2.60 
   4  13  -2   24.70    3.70 
  -4 -13   2   17.10    3.70 
  -4 -13   2   18.80    3.70 
   3  13  -2  133.29    7.70 
  -3 -13   2  127.39    8.10 
  -3 -13   2  140.99    8.60 
   2  13  -2    4.00    2.30 
  -2 -13   2    7.20    2.90 
  -2 -13   2    4.90    2.60 
   1  13  -2   16.70    3.50 
  -1 -13   2   14.70    3.50 
  -1 -13   2   18.70    3.90 
   0  13  -2    3.00    2.10 
   0 -13   2    1.90    2.20 
   0 -13   2    3.10    2.20 
  -1  13  -2   -0.10    1.40 
   1 -13   2    5.20    2.70 
   1 -13   2    1.00    1.60 
  -2  13  -2    8.20    2.80 
   2 -13   2   17.10    4.10 
   2 -13   2   14.90    3.70 
  -3  13  -2    4.70    2.80 
   3 -13   2    0.90    2.00 
   3 -13   2    5.80    3.20 
   3 -13   2    1.10    2.60 
  -4  13  -2    0.40    2.00 
   4 -13   2    1.30    2.30 
   4 -13   2   -1.90    2.50 
  -5  13  -2    3.80    2.70 
   5 -13   2   10.80    3.60 
   5 -13   2    9.60    3.40 
  -6  13  -2    0.70    2.50 
   6 -13   2    8.10    3.20 
   6 -13   2    2.80    3.00 
  -7  13  -2   10.90    3.70 
  -7  13  -2    8.50    3.40 
   7 -13   2    6.60    2.90 
   7 -13   2   10.30    3.70 
  -8  13  -2    6.70    3.30 
  -8  13  -2    7.60    3.70 
   8 -13   2    7.50    3.90 
   8 -13   2   -1.80    1.90 
  -9  13  -2    5.30    3.40 
  -9  13  -2   -0.30    2.40 
   9 -13   2    0.70    2.60 
   9 -13   2    1.80    2.70 
 -10  13  -2  130.59   10.30 
 -10  13  -2  158.18   10.40 
  10 -13   2  135.59   10.90 
  10 -13   2  145.89   10.00 
 -12 -12   2    2.30    1.40 
 -11 -12   2    5.90    1.90 
 -10 -12   2   -0.80    1.30 
  -9 -12   2   10.70    2.60 
  -8 -12   2   13.10    2.70 
  -8 -12   2   10.90    2.80 
  -7 -12   2    2.60    2.00 
  -7 -12   2    1.80    1.60 
   6  12  -2    4.80    1.70 
  -6 -12   2    4.50    2.10 
  -6 -12   2    1.80    1.60 
   5  12  -2   47.50    4.70 
  -5 -12   2   45.70    5.20 
  -5 -12   2   40.00    4.80 
   4  12  -2   89.09    5.60 
  -4 -12   2   68.49    5.60 
  -4 -12   2   79.99    5.90 
   3  12  -2   38.30    4.60 
  -3 -12   2   40.10    4.90 
  -3 -12   2   32.80    4.50 
   2  12  -2   54.59    5.60 
  -2 -12   2   60.69    6.20 
  -2 -12   2   64.39    6.60 
   1  12  -2    9.80    2.70 
  -1 -12   2   11.30    2.90 
  -1 -12   2    7.20    2.80 
   0  12  -2   71.09    5.80 
   0 -12   2   77.49    6.10 
   0 -12   2   90.49    6.70 
  -1  12  -2    1.40    1.80 
   1 -12   2    3.70    2.20 
   1 -12   2    3.60    2.10 
  -2  12  -2    3.50    2.20 
   2 -12   2    0.80    2.10 
   2 -12   2    2.10    1.90 
   2 -12   2    1.60    2.00 
  -3  12  -2    4.30    2.40 
   3 -12   2    2.00    2.40 
   3 -12   2    0.80    2.00 
   3 -12   2    2.70    2.40 
  -4  12  -2   18.00    3.90 
  -4  12  -2   15.20    3.30 
   4 -12   2   20.70    4.00 
   4 -12   2   10.90    3.30 
   4 -12   2   22.70    4.90 
  -5  12  -2   -0.60    1.80 
  -5  12  -2   -0.70    2.00 
   5 -12   2    0.90    1.90 
   5 -12   2    0.30    2.40 
  -6  12  -2    8.80    3.10 
  -6  12  -2    3.20    2.60 
   6 -12   2    9.20    3.20 
   6 -12   2    3.80    3.00 
  -7  12  -2    2.00    2.40 
  -7  12  -2    4.40    2.50 
   7 -12   2    4.20    3.00 
   7 -12   2    0.00    2.10 
  -8  12  -2   15.80    3.80 
  -8  12  -2   18.40    4.50 
   8 -12   2    9.20    3.50 
   8 -12   2    6.20    2.80 
  -9  12  -2   22.80    4.60 
  -9  12  -2   13.00    4.30 
   9 -12   2   22.60    4.80 
   9 -12   2   23.30    5.30 
 -10  12  -2    3.00    2.80 
 -10  12  -2    9.20    3.80 
  10 -12   2    9.60    3.20 
  10 -12   2    9.40    3.90 
 -11  12  -2    3.70    3.20 
 -11  12  -2   14.60    4.00 
  11 -12   2    3.70    3.00 
  11 -12   2   10.50    4.00 
 -12  12  -2   39.70    6.20 
 -12  12  -2   41.10    6.80 
  12 -12   2   47.70    6.60 
  12 -12   2   40.00    6.80 
 -13 -11   2    3.30    1.40 
 -12 -11   2    3.20    1.40 
 -11 -11   2    0.80    1.30 
 -10 -11   2   47.00    3.90 
  -9 -11   2   10.80    2.20 
  -8 -11   2    9.50    2.60 
  -8 -11   2    7.30    2.00 
  -7 -11   2   24.30    3.50 
  -7 -11   2   20.70    3.30 
   6  11  -2   41.00    3.80 
  -6 -11   2   45.30    4.70 
  -6 -11   2   43.20    4.60 
   5  11  -2   20.20    3.10 
  -5 -11   2   15.60    2.90 
  -5 -11   2   17.50    3.20 
   4  11  -2   48.30    4.60 
  -4 -11   2   47.20    5.00 
  -4 -11   2   34.60    4.40 
   3  11  -2   47.60    4.80 
  -3 -11   2   40.90    4.80 
  -3 -11   2   42.20    4.80 
   2  11  -2    5.70    2.00 
  -2 -11   2    2.30    1.80 
  -2 -11   2    5.80    2.20 
   1  11  -2   24.40    3.80 
  -1 -11   2   29.10    4.30 
  -1 -11   2   25.70    3.90 
   0  11  -2   15.40    3.10 
   0 -11   2   11.70    2.90 
   0 -11   2   20.00    3.60 
  -1  11  -2   44.20    5.30 
   1 -11   2   37.40    4.90 
   1 -11   2   29.70    4.60 
   1 -11   2   38.20    5.10 
  -2  11  -2   58.19    5.90 
  -2  11  -2   47.70    5.70 
   2 -11   2   49.40    5.70 
   2 -11   2   45.80    5.70 
   2 -11   2   47.80    5.80 
  -3  11  -2   33.70    4.50 
  -3  11  -2   17.40    3.60 
   3 -11   2   20.90    3.90 
   3 -11   2   22.90    3.80 
   3 -11   2   32.90    5.20 
  -4  11  -2   -1.20    1.50 
  -4  11  -2    1.80    1.80 
   4 -11   2    1.90    2.20 
   4 -11   2   -0.70    1.60 
   4 -11   2   -1.10    1.20 
  -5  11  -2   56.99    6.40 
  -5  11  -2   34.90    4.70 
   5 -11   2   42.00    5.40 
   5 -11   2   39.50    5.60 
   5 -11   2   44.30    6.00 
  -6  11  -2    2.00    2.00 
  -6  11  -2    0.60    1.60 
   6 -11   2    0.20    2.00 
   6 -11   2    2.00    2.30 
  -7  11  -2    3.20    2.30 
  -7  11  -2    1.20    2.20 
   7 -11   2    1.30    1.80 
   7 -11   2    0.50    1.70 
   7 -11   2   -1.30    1.90 
  -8  11  -2   10.50    3.50 
  -8  11  -2    5.30    2.60 
   8 -11   2   14.10    3.70 
   8 -11   2    2.80    3.10 
   8 -11   2    9.80    2.80 
  -9  11  -2    1.50    2.30 
  -9  11  -2    0.60    2.10 
   9 -11   2   -0.60    1.90 
   9 -11   2   -1.20    1.70 
   9 -11   2    0.50    2.30 
 -10  11  -2   10.50    3.60 
 -10  11  -2   10.80    3.60 
  10 -11   2    2.00    2.20 
  10 -11   2    9.70    3.30 
  10 -11   2    4.60    3.40 
 -11  11  -2   -2.20    2.30 
 -11  11  -2    2.10    2.30 
  11 -11   2   -1.40    2.30 
  11 -11   2   -0.70    2.20 
  11 -11   2    1.20    2.30 
 -12  11  -2    4.80    2.90 
 -12  11  -2    5.90    3.70 
  12 -11   2    6.30    3.40 
  12 -11   2    4.80    3.60 
  12 -11   2    3.90    2.90 
 -13  11  -2   16.40    4.90 
 -13  11  -2    4.10    3.30 
  13 -11   2    8.50    3.80 
  13 -11   2    4.90    3.40 
  13 -11   2    4.50    3.20 
 -14 -10   2   10.90    1.20 
 -13 -10   2    1.10    1.00 
 -12 -10   2   11.10    1.80 
 -11 -10   2    2.60    1.20 
 -10 -10   2    4.40    1.50 
  -9 -10   2    7.00    1.70 
  -8 -10   2   80.59    4.90 
  -8 -10   2   82.59    4.90 
   7  10  -2    7.50    1.50 
  -7 -10   2    8.80    2.10 
  -7 -10   2    6.90    2.00 
   6  10  -2   36.70    3.40 
  -6 -10   2   42.30    4.20 
  -6 -10   2   36.00    4.00 
   5  10  -2   73.99    4.40 
  -5 -10   2   79.59    5.00 
  -5 -10   2   79.59    5.10 
   4  10  -2   11.00    2.20 
  -4 -10   2   12.70    2.40 
  -4 -10   2   13.50    2.60 
   3  10  -2  117.99    6.20 
  -3 -10   2  114.89    6.40 
  -3 -10   2  113.49    6.50 
   2  10  -2  127.79    6.80 
  -2 -10   2  138.49    7.20 
  -2 -10   2  124.79    7.00 
   1  10  -2  149.29    7.70 
  -1 -10   2  159.58    8.00 
  -1 -10   2  158.18    8.10 
   0  10  -2    3.30    1.80 
   0 -10   2    3.60    1.70 
   0 -10   2    5.20    2.20 
   0 -10   2    5.30    1.90 
  -1  10  -2    0.70    1.30 
  -1  10  -2   -1.00    1.10 
   1 -10   2    3.20    1.80 
   1 -10   2    2.50    1.60 
   1 -10   2    3.00    2.10 
  -2  10  -2   38.50    4.80 
  -2  10  -2   52.39    4.80 
   2 -10   2   46.10    5.10 
   2 -10   2   52.19    6.00 
   2 -10   2   46.40    5.20 
  -3  10  -2   38.40    4.80 
  -3  10  -2   48.50    4.80 
   3 -10   2   38.80    4.80 
   3 -10   2   48.60    5.50 
   3 -10   2   43.80    5.40 
  -4  10  -2   -0.80    1.40 
  -4  10  -2    0.50    1.30 
   4 -10   2    0.70    1.30 
   4 -10   2   -1.30    1.50 
   4 -10   2    1.50    1.80 
   4 -10   2    0.60    1.70 
  -5  10  -2   48.80    5.50 
  -5  10  -2   37.40    5.00 
   5 -10   2   53.09    6.00 
   5 -10   2   51.89    5.70 
   5 -10   2   53.79    6.00 
   5 -10   2   44.10    4.40 
  -6  10  -2   -1.10    1.50 
  -6  10  -2    3.20    2.10 
   6 -10   2    3.40    1.90 
   6 -10   2   -0.90    1.80 
   6 -10   2    2.40    1.70 
  -7  10  -2    1.00    1.90 
  -7  10  -2    3.30    2.10 
   7 -10   2    5.30    2.20 
   7 -10   2    2.70    2.40 
   7 -10   2    6.30    2.50 
  -8  10  -2    9.50    3.40 
  -8  10  -2   15.80    3.50 
   8 -10   2   11.10    2.90 
   8 -10   2    8.80    2.90 
   8 -10   2    8.30    3.20 
  -9  10  -2   70.29    7.40 
  -9  10  -2   77.99    6.20 
   9 -10   2   77.59    6.20 
   9 -10   2   71.39    7.60 
   9 -10   2   69.49    6.80 
 -10  10  -2    0.40    2.10 
 -10  10  -2    7.30    3.20 
  10 -10   2    0.60    2.70 
  10 -10   2    3.60    2.30 
  10 -10   2    8.10    2.60 
 -11  10  -2    3.20    2.60 
 -11  10  -2    3.50    2.30 
  11 -10   2    1.90    2.20 
  11 -10   2    5.80    2.40 
  11 -10   2    1.40    2.40 
 -12  10  -2    7.90    3.10 
 -12  10  -2    7.10    3.20 
  12 -10   2    3.90    3.10 
  12 -10   2    2.40    2.40 
  12 -10   2    0.50    2.70 
 -13  10  -2   -1.80    1.80 
 -13  10  -2    0.20    2.80 
  13 -10   2   -1.60    2.30 
  13 -10   2   -3.50    2.20 
  13 -10   2   -1.50    2.30 
 -14  10  -2   36.30    6.10 
  14 -10   2   36.00    6.10 
  14 -10   2   31.20    5.60 
  14 -10   2   26.30    5.90 
 -13  -9   2   50.89    2.60 
 -12  -9   2   61.69    3.20 
 -11  -9   2   -0.10    0.80 
 -10  -9   2    2.70    1.20 
  -9  -9   2   19.00    2.40 
  -8  -9   2    2.70    1.40 
  -8  -9   2    4.70    1.40 
   7   9  -2   34.10    2.20 
  -7  -9   2   34.60    3.40 
  -7  -9   2   35.30    3.50 
   6   9  -2   43.90    2.90 
  -6  -9   2   45.20    3.50 
  -6  -9   2   44.40    4.00 
   5   9  -2   13.60    2.10 
  -5  -9   2    7.60    1.90 
  -5  -9   2   10.50    2.20 
   4   9  -2   43.70    3.40 
  -4  -9   2   47.10    3.80 
  -4  -9   2   52.09    3.80 
   3   9  -2  112.59    5.70 
  -3  -9   2  110.09    6.00 
  -3  -9   2  109.59    5.80 
   2   9  -2  129.79    6.50 
  -2  -9   2  122.49    6.60 
  -2  -9   2  132.29    6.60 
   1   9  -2   38.10    4.10 
  -1  -9   2   29.70    3.70 
  -1  -9   2   28.50    3.70 
  -1  -9   2   34.50    4.40 
   0   9  -2  198.18    7.90 
   0   9  -2  208.48    9.00 
   0  -9   2  189.18    8.90 
   0  -9   2  186.78    8.60 
   0  -9   2  207.18    9.40 
  -1   9  -2   45.20    4.30 
  -1   9  -2   49.80    4.90 
   1  -9   2   46.70    5.00 
   1  -9   2   48.70    5.10 
   1  -9   2   51.39    5.10 
  -2   9  -2   46.20    4.40 
  -2   9  -2   34.70    4.30 
   2  -9   2   43.80    3.10 
   2  -9   2   39.40    4.80 
   2  -9   2   40.00    4.50 
   2  -9   2   39.80    4.50 
  -3   9  -2   14.80    2.90 
  -3   9  -2   10.90    2.50 
   3  -9   2   14.60    2.40 
   3  -9   2   17.50    3.10 
   3  -9   2    8.40    2.40 
   3  -9   2   13.50    3.00 
  -4   9  -2   -1.50    1.20 
  -4   9  -2   -0.30    1.40 
   4  -9   2   -1.50    1.20 
   4  -9   2    4.00    2.10 
   4  -9   2    0.60    1.10 
   4  -9   2    0.50    1.30 
  -5   9  -2   -0.80    1.30 
  -5   9  -2   -2.10    0.80 
   5  -9   2    0.50    1.20 
   5  -9   2   -1.80    1.40 
   5  -9   2    1.20    1.40 
   5  -9   2    0.30    1.50 
  -6   9  -2    8.90    2.40 
  -6   9  -2   12.50    3.20 
   6  -9   2    8.70    2.50 
   6  -9   2   11.40    2.60 
   6  -9   2    6.20    2.40 
   6  -9   2   12.30    3.10 
  -7   9  -2   11.40    2.80 
  -7   9  -2   17.40    3.60 
   7  -9   2    7.30    2.50 
   7  -9   2   14.40    2.80 
   7  -9   2   14.20    3.50 
  -8   9  -2    5.00    2.40 
  -8   9  -2    3.60    1.90 
  -8   9  -2    4.30    2.30 
   8  -9   2    3.00    2.30 
   8  -9   2    0.00    1.60 
   8  -9   2    2.70    2.00 
  -9   9  -2    2.90    1.80 
  -9   9  -2    1.90    2.10 
  -9   9  -2    1.00    1.80 
   9  -9   2    0.30    2.00 
   9  -9   2   -1.20    1.50 
   9  -9   2   -0.90    1.40 
 -10   9  -2    2.80    2.10 
 -10   9  -2    5.80    2.70 
 -10   9  -2    0.10    1.80 
  10  -9   2    2.40    2.00 
  10  -9   2    1.80    2.30 
  10  -9   2    2.70    2.10 
 -11   9  -2   25.50    4.70 
 -11   9  -2   26.90    4.70 
 -11   9  -2   27.20    4.60 
  11  -9   2   21.50    3.90 
  11  -9   2   18.80    4.20 
  11  -9   2   20.10    4.40 
  11  -9   2   16.30    4.30 
 -12   9  -2    4.20    2.70 
 -12   9  -2    4.00    2.50 
 -12   9  -2    0.60    2.00 
  12  -9   2    2.90    2.40 
  12  -9   2    2.00    2.10 
  12  -9   2    1.40    2.00 
 -13   9  -2   97.59    9.40 
 -13   9  -2   74.69    7.80 
  13  -9   2  101.09    8.00 
  13  -9   2   91.39    8.80 
  13  -9   2  100.29    8.40 
 -14   9  -2   20.30    4.30 
 -14   9  -2   11.80    3.80 
  14  -9   2   24.00    5.00 
  14  -9   2   19.40    4.70 
  14  -9   2   20.70    4.60 
 -15   9  -2   15.20    4.50 
 -15   9  -2   17.90    4.60 
  15  -9   2   16.60    4.30 
  15  -9   2   21.60    5.00 
  15  -9   2   17.00    4.70 
 -12  -8   2   32.00    1.90 
 -11  -8   2    7.30    1.30 
 -10  -8   2   12.70    1.70 
  -9  -8   2    1.60    0.90 
  -8  -8   2    0.40    0.90 
  -8  -8   2   -1.10    0.60 
   7   8  -2  122.99    4.10 
  -7  -8   2  113.69    5.30 
  -7  -8   2  122.69    5.20 
   6   8  -2   17.50    1.90 
  -6  -8   2   13.30    2.10 
  -6  -8   2   10.80    1.90 
   5   8  -2  114.79    5.00 
  -5  -8   2  110.39    5.50 
  -5  -8   2  121.19    5.40 
   4   8  -2   21.20    2.50 
  -4  -8   2   18.60    2.50 
  -4  -8   2   19.80    2.60 
   3   8  -2  142.59    6.30 
  -3  -8   2  145.59    6.50 
  -3  -8   2  155.08    6.80 
   2   8  -2    3.90    1.10 
   2   8  -2    1.30    1.20 
  -2  -8   2    4.40    1.60 
  -2  -8   2    1.40    1.10 
  -2  -8   2    1.00    1.40 
   1   8  -2   14.10    2.00 
   1   8  -2   13.00    2.30 
  -1  -8   2   12.10    2.50 
  -1  -8   2   12.00    2.20 
  -1  -8   2   11.00    2.30 
   0   8  -2   82.19    4.40 
   0   8  -2   94.39    5.30 
   0  -8   2   88.39    5.20 
   0  -8   2   89.19    5.20 
   0  -8   2   87.99    5.50 
  -1   8  -2    1.30    1.40 
  -1   8  -2    3.10    1.30 
   1  -8   2    1.20    1.50 
   1  -8   2    2.80    1.40 
   1  -8   2    1.10    1.20 
   1  -8   2    2.10    1.00 
  -2   8  -2    4.80    1.70 
  -2   8  -2    2.90    1.50 
  -2   8  -2    2.40    1.30 
   2  -8   2    1.50    1.00 
   2  -8   2    0.50    1.50 
   2  -8   2    2.90    1.60 
   2  -8   2    0.00    1.00 
  -3   8  -2   57.49    4.20 
  -3   8  -2   56.59    4.50 
  -3   8  -2   67.89    4.90 
   3  -8   2   62.19    4.90 
   3  -8   2   60.59    4.50 
   3  -8   2   55.69    4.50 
   3  -8   2   63.69    3.90 
  -4   8  -2   32.00    4.20 
  -4   8  -2   31.20    4.10 
  -4   8  -2   24.20    3.40 
   4  -8   2   26.70    3.10 
   4  -8   2   20.10    3.50 
   4  -8   2   21.70    3.30 
   4  -8   2   24.80    3.60 
  -5   8  -2   82.49    5.30 
  -5   8  -2   87.99    6.00 
  -5   8  -2   75.09    5.50 
   5  -8   2   82.29    5.40 
   5  -8   2   66.59    5.20 
   5  -8   2   81.19    5.90 
   5  -8   2   83.29    5.00 
  -6   8  -2    3.30    1.90 
  -6   8  -2    8.00    2.40 
  -6   8  -2    9.60    2.30 
   6  -8   2    5.90    2.40 
   6  -8   2    7.10    2.20 
   6  -8   2    3.80    1.90 
   6  -8   2    6.30    2.00 
  -7   8  -2  105.39    6.80 
  -7   8  -2  105.29    6.80 
  -7   8  -2  107.99    6.50 
   7  -8   2  103.29    6.30 
   7  -8   2  104.99    7.00 
   7  -8   2   98.69    6.20 
  -8   8  -2    3.40    1.90 
  -8   8  -2    8.10    2.60 
  -8   8  -2    3.90    2.20 
   8  -8   2    3.70    1.70 
   8  -8   2   10.60    2.70 
   8  -8   2    9.00    2.60 
  -9   8  -2   18.90    3.80 
  -9   8  -2   16.50    3.50 
  -9   8  -2   22.00    3.60 
   9  -8   2   17.30    3.10 
   9  -8   2   13.70    3.40 
   9  -8   2   24.00    3.90 
 -10   8  -2    6.80    2.60 
 -10   8  -2    9.00    3.10 
 -10   8  -2   11.80    3.10 
  10  -8   2   11.50    2.90 
  10  -8   2   11.10    3.40 
  10  -8   2    4.80    2.50 
 -11   8  -2    2.00    2.10 
 -11   8  -2    7.50    2.60 
 -11   8  -2    2.00    2.10 
  11  -8   2    7.30    2.30 
  11  -8   2    5.50    2.60 
  11  -8   2    6.20    2.80 
  11  -8   2    6.60    2.90 
 -12   8  -2    1.20    1.90 
 -12   8  -2    6.60    2.60 
 -12   8  -2    4.40    2.40 
  12  -8   2    1.90    2.40 
  12  -8   2    6.10    2.70 
  12  -8   2    1.80    2.00 
 -13   8  -2    1.00    2.00 
 -13   8  -2    0.90    2.00 
  13  -8   2    3.60    2.60 
  13  -8   2   -0.80    2.00 
  13  -8   2    0.90    2.10 
 -14   8  -2    4.50    2.60 
 -14   8  -2    3.40    2.70 
  14  -8   2    5.30    3.00 
  14  -8   2    4.80    2.80 
  14  -8   2    4.90    2.50 
 -15   8  -2   -1.70    1.90 
 -15   8  -2    4.90    2.70 
  15  -8   2    6.40    3.00 
  15  -8   2    8.10    3.70 
  15  -8   2   -0.70    2.20 
 -16   8  -2    4.00    2.60 
 -16   8  -2   11.70    3.90 
  16  -8   2   16.80    4.80 
  16  -8   2   14.60    3.90 
  16  -8   2    8.80    3.80 
 -11  -7   2   20.90    1.60 
 -11  -7   2   22.20    1.50 
 -10  -7   2   35.80    2.10 
 -10  -7   2   36.50    2.20 
  -9  -7   2   23.90    2.20 
  -9  -7   2   24.00    1.90 
  -8  -7   2    3.90    1.00 
  -8  -7   2    2.40    1.00 
  -8  -7   2    4.30    1.10 
  -7  -7   2   16.60    2.00 
  -7  -7   2   21.10    2.00 
  -7  -7   2   15.50    2.00 
   6   7  -2   24.30    1.70 
  -6  -7   2   28.30    2.50 
  -6  -7   2   23.80    2.50 
  -6  -7   2   26.70    2.60 
   5   7  -2    1.80    0.90 
  -5  -7   2    1.10    1.00 
  -5  -7   2    0.10    0.80 
  -5  -7   2    2.90    1.10 
   4   7  -2   55.09    3.10 
  -4  -7   2   46.80    3.20 
  -4  -7   2   47.80    3.10 
  -4  -7   2   48.20    3.70 
  -4  -7   2   48.10    3.30 
   3   7  -2   14.60    1.00 
   3   7  -2   16.90    2.20 
  -3  -7   2   19.60    2.70 
  -3  -7   2   18.60    2.40 
  -3  -7   2   20.30    2.50 
  -3  -7   2   11.40    1.90 
   2   7  -2   -0.50    0.50 
   2   7  -2   -0.50    0.80 
  -2  -7   2    0.50    0.90 
  -2  -7   2    0.20    0.90 
  -2  -7   2    0.00    0.80 
  -2  -7   2   -0.70    0.90 
   1   7  -2  109.29    4.70 
   1   7  -2  110.09    5.40 
   1   7  -2  116.79    5.50 
  -1  -7   2  109.39    5.50 
  -1  -7   2  108.59    5.30 
  -1  -7   2  114.49    5.70 
  -1  -7   2  115.39    5.80 
   0   7  -2   83.99    4.80 
   0   7  -2   89.19    4.90 
   0   7  -2   86.29    4.30 
   0  -7   2   93.59    5.10 
   0  -7   2   95.69    3.70 
   0  -7   2   87.59    5.10 
   0  -7   2   92.49    4.90 
  -1   7  -2   48.00    3.70 
  -1   7  -2   49.40    3.30 
  -1   7  -2   50.19    3.70 
   1  -7   2   52.29    3.80 
   1  -7   2   47.10    2.70 
   1  -7   2   52.19    4.80 
   1  -7   2   49.60    3.70 
  -2   7  -2   43.20    4.10 
  -2   7  -2   38.40    3.70 
  -2   7  -2   37.40    3.90 
   2  -7   2   36.30    2.60 
   2  -7   2   36.70    3.70 
   2  -7   2   32.40    3.90 
   2  -7   2   35.90    3.90 
  -3   7  -2   13.40    2.60 
  -3   7  -2   13.10    2.50 
  -3   7  -2   11.60    2.20 
   3  -7   2   10.30    2.10 
   3  -7   2   11.60    2.40 
   3  -7   2   11.00    2.40 
   3  -7   2   15.50    2.20 
  -4   7  -2    0.30    1.10 
  -4   7  -2   -0.20    1.30 
  -4   7  -2    0.70    1.10 
   4  -7   2    0.70    1.10 
   4  -7   2    0.10    1.20 
   4  -7   2    1.30    1.10 
   4  -7   2    0.80    1.10 
  -5   7  -2   68.59    4.90 
  -5   7  -2   55.69    4.60 
  -5   7  -2   53.79    4.10 
   5  -7   2   69.39    5.00 
   5  -7   2   62.99    4.20 
   5  -7   2   69.19    4.80 
   5  -7   2   65.29    4.50 
  -6   7  -2   34.00    4.10 
  -6   7  -2   38.20    4.20 
  -6   7  -2   21.30    3.40 
   6  -7   2   34.20    4.40 
   6  -7   2   32.00    3.90 
   6  -7   2   27.90    3.90 
   6  -7   2   31.30    3.90 
  -7   7  -2   11.30    2.50 
  -7   7  -2    8.30    2.50 
  -7   7  -2    6.80    2.20 
   7  -7   2    8.40    2.50 
   7  -7   2   10.00    2.30 
   7  -7   2    8.30    2.20 
   7  -7   2    8.30    2.30 
  -8   7  -2   -0.80    1.00 
  -8   7  -2    0.30    1.60 
  -8   7  -2   -1.00    1.00 
   8  -7   2    1.40    1.70 
   8  -7   2   -2.10    0.90 
   8  -7   2   -0.20    1.30 
  -9   7  -2    4.30    2.10 
  -9   7  -2    4.20    2.00 
  -9   7  -2    0.80    1.80 
   9  -7   2    4.60    2.20 
   9  -7   2    5.00    1.90 
   9  -7   2    7.20    2.30 
 -10   7  -2    2.20    2.10 
 -10   7  -2    2.00    2.00 
 -10   7  -2    1.90    1.50 
  10  -7   2    1.40    1.50 
  10  -7   2    5.30    2.70 
  10  -7   2    2.00    1.90 
  10  -7   2   -0.60    1.70 
 -11   7  -2    2.60    2.10 
 -11   7  -2    3.40    2.00 
 -11   7  -2    6.20    2.30 
  11  -7   2    2.30    2.00 
  11  -7   2    4.70    2.00 
  11  -7   2    5.90    2.90 
  11  -7   2    4.00    2.10 
 -12   7  -2   17.80    3.90 
 -12   7  -2   15.90    3.50 
 -12   7  -2   12.10    2.90 
  12  -7   2   13.50    3.40 
  12  -7   2   11.10    3.40 
  12  -7   2   12.50    3.70 
 -13   7  -2  134.09    8.10 
 -13   7  -2  133.69    8.60 
  13  -7   2  131.39    9.30 
  13  -7   2  131.79    8.40 
  13  -7   2  123.29    8.50 
 -14   7  -2    2.80    2.20 
 -14   7  -2    4.10    2.60 
  14  -7   2    4.80    2.70 
  14  -7   2    3.20    2.40 
  14  -7   2    4.70    2.70 
 -15   7  -2   18.50    4.10 
 -15   7  -2   20.40    4.10 
  15  -7   2   18.70    4.20 
  15  -7   2   13.10    3.60 
  15  -7   2   21.60    5.00 
 -16   7  -2   24.00    4.50 
 -16   7  -2   30.50    5.30 
  16  -7   2   20.10    5.00 
  16  -7   2   26.30    5.20 
  16  -7   2   24.70    4.60 
 -17   7  -2    2.40    2.60 
 -17   7  -2    5.10    3.00 
  17  -7   2   -1.80    2.20 
  17  -7   2    6.40    3.50 
  17  -7   2    5.60    2.70 
 -10  -6   2   69.89    2.70 
 -10  -6   2   66.89    2.70 
  -9  -6   2   18.70    1.40 
  -9  -6   2   21.60    1.50 
  -8  -6   2    6.80    1.10 
  -8  -6   2    4.40    0.90 
  -8  -6   2    4.70    0.80 
  -7  -6   2   24.10    1.80 
  -7  -6   2   29.00    2.00 
  -7  -6   2   24.80    1.60 
   6   6  -2    6.10    0.80 
   6   6  -2    7.90    0.90 
  -6  -6   2    7.50    1.10 
  -6  -6   2    7.20    1.20 
  -6  -6   2    7.40    1.30 
   5   6  -2   34.70    2.00 
  -5  -6   2   34.90    2.20 
  -5  -6   2   36.90    2.40 
  -5  -6   2   36.70    2.40 
   4   6  -2    0.40    0.60 
  -4  -6   2    1.10    0.70 
  -4  -6   2    1.70    0.90 
  -4  -6   2    0.50    0.80 
   3   6  -2   13.30    1.80 
  -3  -6   2   10.80    1.70 
  -3  -6   2   12.80    1.90 
  -3  -6   2   11.10    1.70 
  -3  -6   2   13.90    2.00 
   2   6  -2   37.00    2.70 
   2   6  -2   39.30    2.10 
  -2  -6   2   36.40    2.70 
  -2  -6   2   39.60    3.00 
  -2  -6   2   36.50    2.70 
  -2  -6   2   37.50    2.80 
   1   6  -2  155.68    5.80 
   1   6  -2  160.48    6.50 
   1   6  -2  161.78    6.50 
  -1  -6   2  159.28    6.40 
  -1  -6   2  179.38    6.90 
  -1  -6   2  159.58    6.60 
  -1  -6   2  172.08    6.90 
   0   6  -2    6.50    1.70 
   0   6  -2    3.60    1.20 
   0   6  -2    3.50    1.30 
   0  -6   2    3.90    0.90 
   0  -6   2    2.80    1.20 
   0  -6   2    3.90    1.40 
   0  -6   2    2.30    1.20 
  -1   6  -2    4.30    1.40 
  -1   6  -2    4.20    1.40 
  -1   6  -2    5.10    1.50 
   1  -6   2    4.80    1.60 
   1  -6   2    2.40    0.90 
   1  -6   2    2.80    1.20 
   1  -6   2    3.90    1.30 
  -2   6  -2  163.98    6.60 
  -2   6  -2  147.79    6.80 
  -2   6  -2  156.78    7.00 
   2  -6   2  161.78    7.20 
   2  -6   2  164.28    6.80 
   2  -6   2  158.38    6.00 
   2  -6   2  153.88    6.90 
  -3   6  -2   -0.20    1.10 
  -3   6  -2   -0.80    0.80 
  -3   6  -2   -1.10    0.80 
   3  -6   2    1.30    1.20 
   3  -6   2   -0.10    0.90 
   3  -6   2   -0.30    0.80 
   3  -6   2   -1.10    0.60 
  -4   6  -2    1.10    1.10 
  -4   6  -2    2.50    1.30 
  -4   6  -2    1.50    1.30 
   4  -6   2    0.70    1.00 
   4  -6   2    4.90    1.70 
   4  -6   2    1.70    1.20 
   4  -6   2    0.90    1.00 
  -5   6  -2   64.99    4.50 
  -5   6  -2   65.79    4.50 
  -5   6  -2   59.99    4.00 
   5  -6   2   62.69    4.10 
   5  -6   2   60.09    4.30 
   5  -6   2   56.69    4.00 
   5  -6   2   64.49    4.60 
  -6   6  -2    5.60    1.80 
  -6   6  -2    6.00    1.80 
  -6   6  -2    5.00    1.60 
   6  -6   2    7.50    2.00 
   6  -6   2    5.80    1.90 
   6  -6   2    6.10    2.00 
  -7   6  -2   55.19    4.40 
  -7   6  -2   49.50    4.90 
  -7   6  -2   59.99    4.20 
   7  -6   2   59.19    4.30 
   7  -6   2   55.59    4.30 
   7  -6   2   53.79    5.20 
   7  -6   2   56.09    4.10 
  -8   6  -2   21.50    3.20 
  -8   6  -2   21.10    3.40 
  -8   6  -2   15.50    3.00 
   8  -6   2   19.60    3.30 
   8  -6   2   26.60    3.40 
   8  -6   2   18.20    3.30 
  -9   6  -2   27.00    3.70 
  -9   6  -2   32.10    4.40 
  -9   6  -2   25.90    3.80 
   9  -6   2   22.50    3.50 
   9  -6   2   21.40    3.70 
   9  -6   2   28.00    3.50 
 -10   6  -2   -0.20    1.40 
 -10   6  -2    0.60    1.40 
 -10   6  -2    4.00    1.80 
  10  -6   2   -0.80    1.60 
  10  -6   2   -0.80    1.00 
  10  -6   2   -1.20    1.20 
  10  -6   2   -0.60    1.40 
 -11   6  -2   -0.80    1.30 
 -11   6  -2    0.10    1.60 
 -11   6  -2    0.50    1.50 
  11  -6   2    2.10    1.70 
  11  -6   2    0.90    1.80 
  11  -6   2    1.50    1.70 
 -12   6  -2    2.00    1.80 
 -12   6  -2    3.20    1.90 
  12  -6   2    5.30    2.40 
  12  -6   2    4.50    2.50 
  12  -6   2    0.70    1.90 
 -13   6  -2    5.20    2.10 
 -13   6  -2    7.70    2.60 
  13  -6   2    9.50    3.00 
  13  -6   2    6.80    2.90 
  13  -6   2   11.50    3.00 
 -14   6  -2    6.80    2.60 
 -14   6  -2    8.00    2.70 
  14  -6   2    8.40    2.90 
  14  -6   2    9.30    3.20 
  14  -6   2    6.70    3.10 
 -15   6  -2    6.50    2.80 
 -15   6  -2    4.30    2.50 
  15  -6   2    1.20    2.80 
  15  -6   2    7.90    3.30 
  15  -6   2    9.50    3.00 
 -16   6  -2   44.20    6.10 
 -16   6  -2   47.90    6.00 
  16  -6   2   44.60    7.00 
  16  -6   2   40.20    5.40 
  16  -6   2   41.10    6.30 
 -17   6  -2   -1.50    2.00 
 -17   6  -2    1.50    2.30 
  17  -6   2   -2.10    1.90 
  17  -6   2   -2.80    2.30 
  17  -6   2    2.50    2.60 
 -18   6  -2   20.20    4.50 
 -18   6  -2   23.10    4.60 
  18  -6   2   17.80    4.90 
  18  -6   2   30.20    4.70 
  18  -6   2   19.70    5.60 
  18   5  -2    3.10    3.50 
  17   5  -2    8.20    3.60 
  16   5  -2   10.40    3.60 
  15   5  -2    4.10    2.60 
  14   5  -2    0.90    2.00 
  13   5  -2    0.00    1.90 
  12   5  -2   71.09    7.30 
  11   5  -2   49.90    5.80 
  11   5  -2   51.69    3.60 
  10   5  -2   43.70    3.10 
  10   5  -2   41.90    5.00 
   9   5  -2    5.90    1.40 
  -9  -5   2    2.10    0.50 
  -9  -5   2    2.30    0.50 
   8   5  -2    6.50    1.30 
  -8  -5   2    8.10    0.90 
  -8  -5   2    5.80    0.80 
   7   5  -2   67.69    3.00 
  -7  -5   2   67.39    2.70 
  -7  -5   2   67.29    2.80 
   6   5  -2   99.49    3.50 
  -6  -5   2   99.39    3.20 
  -6  -5   2   98.89    3.20 
  -6  -5   2   98.19    3.70 
  -6  -5   2   99.89    3.80 
   5   5  -2    3.90    0.60 
   5   5  -2    3.80    0.70 
  -5  -5   2    2.80    0.90 
  -5  -5   2    4.00    0.80 
  -5  -5   2    3.90    0.90 
   4   5  -2   98.09    3.70 
  -4  -5   2   87.39    3.80 
  -4  -5   2   94.49    3.60 
  -4  -5   2   89.59    3.90 
   3   5  -2  235.28    7.70 
  -3  -5   2  240.98    8.00 
  -3  -5   2  240.18    7.60 
  -3  -5   2  240.38    7.90 
   2   5  -2    1.20    0.90 
   2   5  -2   -0.30    0.40 
  -2  -5   2    0.20    0.70 
  -2  -5   2   -0.50    0.60 
  -2  -5   2   -0.70    0.80 
  -2  -5   2   -0.30    0.70 
   1   5  -2    3.10    1.10 
   1   5  -2    3.40    1.20 
   1   5  -2    1.90    0.90 
  -1  -5   2    1.70    1.00 
  -1  -5   2    3.30    1.10 
  -1  -5   2    3.70    1.10 
  -1  -5   2    0.60    1.00 
   0   5  -2   95.09    4.10 
   0   5  -2  106.99    4.70 
   0   5  -2   92.99    4.40 
   0  -5   2   91.99    4.50 
   0  -5   2   97.79    4.70 
   0  -5   2  101.09    4.50 
   0  -5   2   95.49    3.50 
  -1   5  -2   12.30    1.90 
  -1   5  -2    7.70    1.50 
  -1   5  -2    7.30    1.50 
   1  -5   2    5.90    1.60 
   1  -5   2   10.00    1.40 
   1  -5   2    9.20    1.70 
   1  -5   2    8.20    1.60 
  -2   5  -2   67.09    3.90 
  -2   5  -2   65.19    3.90 
  -2   5  -2   65.09    3.60 
   2  -5   2   58.99    3.20 
   2  -5   2   65.69    3.80 
   2  -5   2   59.99    3.80 
   2  -5   2   60.09    3.50 
  -3   5  -2   35.80    3.50 
  -3   5  -2   32.10    3.30 
  -3   5  -2   33.70    2.60 
   3  -5   2   35.60    2.90 
   3  -5   2   33.10    2.60 
   3  -5   2   40.90    2.90 
   3  -5   2   37.20    3.60 
  -4   5  -2  185.58    7.70 
  -4   5  -2  202.38    8.00 
  -4   5  -2  191.18    7.40 
   4  -5   2  182.38    7.30 
   4  -5   2  167.98    7.50 
   4  -5   2  177.38    7.70 
   4  -5   2  195.38    7.30 
  -5   5  -2   83.39    5.00 
  -5   5  -2   92.19    5.10 
  -5   5  -2   88.49    4.70 
   5  -5   2   98.99    5.30 
   5  -5   2   90.89    4.80 
   5  -5   2   99.49    5.00 
   5  -5   2   96.29    5.20 
  -6   5  -2   60.69    3.90 
  -6   5  -2   53.49    3.90 
  -6   5  -2   60.39    4.20 
   6  -5   2   59.89    4.00 
   6  -5   2   54.79    3.60 
   6  -5   2   54.99    3.90 
   6  -5   2   51.49    3.90 
  -7   5  -2    6.30    1.80 
  -7   5  -2    7.50    2.00 
  -7   5  -2    8.20    1.90 
   7  -5   2    6.20    1.80 
   7  -5   2    5.60    1.60 
   7  -5   2   12.10    2.30 
   7  -5   2    6.30    1.90 
  -8   5  -2    3.20    1.50 
  -8   5  -2    1.30    1.30 
  -8   5  -2    1.20    1.40 
   8  -5   2    0.20    1.00 
   8  -5   2    0.70    1.20 
   8  -5   2    0.40    1.20 
   8  -5   2    0.70    1.20 
  -9   5  -2   12.20    2.80 
  -9   5  -2    7.60    2.00 
  -9   5  -2    9.00    2.20 
   9  -5   2   15.50    2.80 
   9  -5   2   11.90    2.70 
   9  -5   2   14.50    2.30 
   9  -5   2   13.60    3.00 
 -10   5  -2  233.28   10.20 
 -10   5  -2  225.38    9.90 
 -10   5  -2  213.28    9.30 
  10  -5   2  215.08   10.10 
  10  -5   2  225.28    9.90 
  10  -5   2  227.88   11.00 
  10  -5   2  209.98    8.50 
 -11   5  -2   25.90    3.70 
 -11   5  -2   27.40    3.90 
 -11   5  -2   20.00    3.30 
  11  -5   2   24.00    4.30 
  11  -5   2   19.60    3.40 
  11  -5   2   17.90    3.50 
 -12   5  -2    2.30    1.80 
 -12   5  -2    2.50    1.70 
  12  -5   2    4.30    2.10 
  12  -5   2    4.20    2.10 
  12  -5   2    6.80    2.50 
 -13   5  -2  108.19    6.80 
 -13   5  -2  121.99    7.40 
  13  -5   2  118.29    8.30 
  13  -5   2  120.09    8.00 
  13  -5   2  129.09    7.40 
 -14   5  -2    2.30    1.80 
 -14   5  -2   -0.20    1.60 
  14  -5   2   -1.90    1.70 
  14  -5   2    2.20    2.00 
  14  -5   2    5.80    2.80 
 -15   5  -2   44.50    5.40 
 -15   5  -2   56.89    6.50 
  15  -5   2   48.90    5.50 
  15  -5   2   39.50    6.00 
  15  -5   2   50.99    7.00 
 -16   5  -2   35.40    5.20 
 -16   5  -2   25.40    4.30 
  16  -5   2   36.40    5.60 
  16  -5   2   32.00    4.60 
  16  -5   2   36.30    6.30 
 -17   5  -2    5.00    2.60 
 -17   5  -2    0.50    2.20 
  17  -5   2    2.30    2.80 
  17  -5   2    3.10    2.80 
  17  -5   2    4.50    2.10 
 -18   5  -2    4.40    2.50 
 -18   5  -2    4.80    2.70 
  18  -5   2   -0.10    2.00 
  18  -5   2    1.20    2.60 
  18  -5   2    2.30    2.70 
  19   4  -2    7.80    3.80 
  18   4  -2   -1.70    2.20 
  17   4  -2   20.20    4.80 
  16   4  -2   37.50    6.10 
  15   4  -2   18.70    4.40 
  14   4  -2    3.20    2.40 
  14   4  -2    1.20    1.70 
  13   4  -2   39.70    4.40 
  13   4  -2   43.70    5.80 
  12   4  -2  365.86   12.70 
  12   4  -2  338.27   15.00 
  11   4  -2    2.80    1.80 
  11   4  -2    1.90    1.30 
  10   4  -2   64.79    5.20 
  10   4  -2   58.69    3.80 
   9   4  -2   39.90    2.90 
   9   4  -2   52.69    5.30 
   8   4  -2   24.60    2.40 
   8   4  -2   25.70    3.60 
   7   4  -2  101.69    5.80 
   7   4  -2   96.39    4.10 
  -7  -4   2  103.99    3.20 
  -7  -4   2   91.69    3.10 
   6   4  -2  155.88    5.20 
  -6  -4   2  144.99    4.60 
  -6  -4   2  156.58    4.70 
   5   4  -2   34.60    1.80 
  -5  -4   2   35.40    1.80 
  -5  -4   2   37.60    1.80 
   4   4  -2   67.39    2.30 
   4   4  -2   63.39    2.50 
  -4  -4   2   65.99    2.40 
  -4  -4   2   61.59    2.70 
  -4  -4   2   65.39    2.40 
  -4  -4   2   70.99    2.90 
   3   4  -2   73.29    3.00 
  -3  -4   2   67.29    3.00 
  -3  -4   2   69.59    2.80 
  -3  -4   2   73.69    3.10 
   2   4  -2    2.60    0.90 
   2   4  -2    1.90    0.60 
  -2  -4   2    2.80    0.90 
  -2  -4   2    1.80    0.70 
  -2  -4   2    1.20    0.70 
   1   4  -2    6.80    1.20 
   1   4  -2    7.10    1.00 
   1   4  -2    7.80    1.30 
  -1  -4   2    5.60    1.20 
  -1  -4   2    7.70    1.20 
  -1  -4   2    7.90    1.40 
  -1  -4   2    6.00    1.20 
   0   4  -2  277.17    9.00 
   0   4  -2  268.47    8.50 
   0   4  -2  281.47    9.10 
   0  -4   2  279.17    8.00 
   0  -4   2  296.87    9.30 
   0  -4   2  275.67    9.00 
   0  -4   2  275.37    8.80 
  -1   4  -2  398.56   12.50 
  -1   4  -2  400.76   12.10 
  -1   4  -2  408.16   12.50 
   1  -4   2  409.76   12.60 
   1  -4   2  416.06   11.60 
   1  -4   2  384.26   12.10 
   1  -4   2  427.36   12.70 
  -2   4  -2   19.50    2.30 
  -2   4  -2   18.30    2.20 
  -2   4  -2   18.90    2.10 
   2  -4   2   23.30    2.60 
   2  -4   2   19.10    1.90 
   2  -4   2   18.20    2.10 
   2  -4   2   20.10    2.40 
  -3   4  -2    3.00    1.30 
  -3   4  -2    0.30    0.90 
  -3   4  -2    1.60    1.00 
   3  -4   2    2.10    1.00 
   3  -4   2    0.70    0.90 
   3  -4   2    2.00    1.10 
   3  -4   2    1.60    1.10 
  -4   4  -2  165.78    6.80 
  -4   4  -2  175.68    6.50 
  -4   4  -2  157.08    6.60 
   4  -4   2  164.08    6.50 
   4  -4   2  165.58    6.90 
   4  -4   2  159.28    6.40 
   4  -4   2  173.78    6.90 
  -5   4  -2  120.19    5.30 
  -5   4  -2  120.39    5.60 
  -5   4  -2  120.19    5.70 
   5  -4   2  128.49    5.40 
   5  -4   2  107.39    5.30 
   5  -4   2  112.89    5.60 
   5  -4   2  118.69    5.50 
  -6   4  -2   39.70    3.70 
  -6   4  -2   33.90    2.70 
  -6   4  -2   38.10    3.70 
   6  -4   2   38.30    3.70 
   6  -4   2   43.40    3.30 
   6  -4   2   31.70    3.40 
   6  -4   2   41.00    2.90 
  -7   4  -2   43.10    3.20 
  -7   4  -2   42.00    3.40 
  -7   4  -2   45.10    4.20 
   7  -4   2   44.50    3.60 
   7  -4   2   43.70    3.10 
   7  -4   2   45.80    3.30 
   7  -4   2   41.10    4.10 
  -8   4  -2   24.10    2.90 
  -8   4  -2   27.10    3.30 
  -8   4  -2   23.60    3.00 
   8  -4   2   21.10    3.10 
   8  -4   2   27.60    3.40 
   8  -4   2   33.00    4.10 
   8  -4   2   31.60    3.40 
   8  -4   2   25.50    2.70 
  -9   4  -2   25.40    3.50 
  -9   4  -2   27.40    3.60 
  -9   4  -2   27.00    3.30 
   9  -4   2   32.90    3.10 
   9  -4   2   26.20    3.30 
   9  -4   2   29.70    3.90 
   9  -4   2   26.20    3.90 
 -10   4  -2   49.00    4.80 
 -10   4  -2   48.00    3.70 
 -10   4  -2   47.70    4.80 
  10  -4   2   43.30    5.00 
  10  -4   2   45.90    4.90 
  10  -4   2   37.80    4.10 
  10  -4   2   43.00    3.10 
 -11   4  -2   -0.90    0.90 
 -11   4  -2    0.90    1.30 
 -11   4  -2    1.70    1.50 
  11  -4   2    1.70    1.60 
  11  -4   2    0.20    1.30 
  11  -4   2   -1.90    1.00 
 -12   4  -2    2.00    1.60 
 -12   4  -2    1.30    1.50 
  12  -4   2   -0.30    1.50 
  12  -4   2    3.30    1.70 
  12  -4   2    2.30    1.90 
 -13   4  -2   10.90    2.50 
 -13   4  -2    8.70    2.40 
  13  -4   2   11.60    3.10 
  13  -4   2   13.90    3.50 
  13  -4   2   12.60    2.80 
 -14   4  -2    0.20    1.40 
 -14   4  -2    1.90    1.60 
  14  -4   2   -1.60    1.40 
  14  -4   2    0.90    1.40 
  14  -4   2    0.10    1.90 
 -15   4  -2    2.20    1.90 
 -15   4  -2    5.60    2.10 
  15  -4   2    3.80    2.40 
  15  -4   2   -0.30    2.10 
  15  -4   2    2.00    1.70 
 -16   4  -2    8.40    2.80 
 -16   4  -2   10.50    2.80 
  16  -4   2   10.60    3.60 
  16  -4   2   11.70    3.50 
  16  -4   2   10.00    2.80 
 -17   4  -2   10.50    3.00 
 -17   4  -2   14.50    3.40 
  17  -4   2   16.40    3.30 
  17  -4   2    7.90    3.40 
  17  -4   2    5.10    3.00 
 -18   4  -2   55.59    6.40 
 -18   4  -2   48.30    6.00 
  18  -4   2   66.89    8.70 
  18  -4   2   57.29    5.60 
  18  -4   2   56.19    7.60 
 -19   4  -2   17.10    3.80 
 -19   4  -2   12.10    3.70 
  19  -4   2   22.90    5.20 
  19  -4   2   18.60    5.00 
  19   3  -2   -2.30    2.80 
 -19  -3   2    1.30    1.00 
  18   3  -2   -0.90    2.20 
 -18  -3   2   -1.10    0.90 
  17   3  -2   -1.00    1.90 
  17   3  -2   -2.10    1.80 
 -17  -3   2    0.30    0.80 
  16   3  -2    9.60    3.50 
  16   3  -2    6.40    2.50 
 -16  -3   2    7.20    1.30 
  15   3  -2    0.40    2.00 
  15   3  -2    0.40    1.40 
 -15  -3   2    2.30    0.90 
  14   3  -2   21.70    3.60 
  14   3  -2   20.50    4.30 
 -14  -3   2   25.60    1.80 
 -14  -3   2   24.50    1.80 
  13   3  -2    0.40    1.90 
  13   3  -2    9.20    2.40 
 -13  -3   2    7.60    1.10 
 -13  -3   2    8.60    1.10 
  12   3  -2   14.40    3.40 
  12   3  -2   17.70    2.90 
 -12  -3   2   13.90    1.30 
 -12  -3   2   14.80    1.20 
  11   3  -2    0.00    1.50 
  11   3  -2    0.50    1.20 
 -11  -3   2   -0.30    0.40 
 -11  -3   2    0.50    0.50 
  10   3  -2    1.20    1.50 
  10   3  -2   -1.20    0.80 
 -10  -3   2    0.30    0.40 
 -10  -3   2    0.00    0.30 
   9   3  -2   10.60    1.90 
   9   3  -2   11.20    2.50 
   8   3  -2   38.30    4.20 
   8   3  -2   44.70    2.90 
   7   3  -2    1.10    1.20 
   7   3  -2   -0.20    0.60 
   6   3  -2   -0.30    0.60 
   6   3  -2   -0.80    0.90 
  -6  -3   2    1.20    0.30 
  -6  -3   2    1.10    0.30 
   5   3  -2    7.70    1.10 
   5   3  -2    8.70    1.80 
  -5  -3   2    8.10    0.70 
  -5  -3   2    6.80    0.70 
   4   3  -2   32.60    1.70 
   4   3  -2   32.40    1.20 
  -4  -3   2   29.30    1.40 
  -4  -3   2   33.60    1.50 
   3   3  -2  580.84   14.90 
   3   3  -2  564.44   15.10 
  -3  -3   2  580.94   14.80 
  -3  -3   2  573.64   14.80 
  -3  -3   2  571.24   15.50 
  -3  -3   2  569.84   15.60 
   2   3  -2  632.14   17.00 
   2   3  -2  628.44   16.20 
  -2  -3   2  644.54   16.80 
  -2  -3   2  644.24   17.40 
  -2  -3   2  635.34   17.40 
   1   3  -2    4.30    0.80 
   1   3  -2    1.90    0.80 
   1   3  -2    2.70    0.80 
  -1  -3   2    4.50    0.90 
  -1  -3   2    4.30    0.90 
  -1  -3   2    3.80    0.90 
   0   3  -2   39.60    2.30 
   0   3  -2   42.20    2.40 
   0   3  -2   42.40    2.20 
   0  -3   2   43.30    2.30 
   0  -3   2   42.20    2.40 
   0  -3   2   47.00    2.50 
   0  -3   2   44.10    2.30 
  -1   3  -2   36.00    2.30 
  -1   3  -2   36.70    2.30 
  -1   3  -2   44.50    2.40 
   1  -3   2   40.90    2.60 
   1  -3   2   38.90    2.40 
   1  -3   2   42.00    2.30 
   1  -3   2   42.50    2.10 
  -2   3  -2    4.90    1.20 
  -2   3  -2    4.30    1.10 
  -2   3  -2    4.80    1.10 
   2  -3   2    5.30    1.10 
   2  -3   2    5.90    1.30 
   2  -3   2    4.60    1.20 
   2  -3   2    6.10    1.30 
  -3   3  -2  186.18    6.80 
  -3   3  -2  186.08    6.50 
  -3   3  -2  191.98    7.00 
   3  -3   2  189.48    6.70 
   3  -3   2  192.88    6.90 
   3  -3   2  196.48    7.00 
   3  -3   2  190.88    6.60 
  -4   3  -2  193.58    7.10 
  -4   3  -2  190.28    7.00 
  -4   3  -2  184.18    6.60 
   4  -3   2  182.28    6.80 
   4  -3   2  192.28    7.00 
   4  -3   2  185.18    6.90 
   4  -3   2  180.88    6.60 
  -5   3  -2    2.50    1.10 
  -5   3  -2    0.80    0.90 
  -5   3  -2    6.00    1.40 
   5  -3   2    3.10    1.20 
   5  -3   2    3.90    1.20 
   5  -3   2    2.70    1.10 
   5  -3   2    4.90    1.30 
  -6   3  -2  116.49    5.00 
  -6   3  -2  114.29    5.30 
  -6   3  -2  112.39    5.30 
   6  -3   2  120.79    5.60 
   6  -3   2  115.29    5.20 
   6  -3   2  110.89    5.30 
   6  -3   2  110.09    4.80 
  -7   3  -2    0.90    1.00 
  -7   3  -2    1.20    0.90 
  -7   3  -2    1.80    1.10 
   7  -3   2    1.40    0.80 
   7  -3   2    0.40    1.00 
   7  -3   2    1.90    1.40 
   7  -3   2    1.40    1.00 
   7  -3   2   -1.20    0.80 
  -8   3  -2   -1.10    0.60 
  -8   3  -2    1.70    1.10 
  -8   3  -2   -0.40    0.90 
   8  -3   2    1.30    1.20 
   8  -3   2    2.00    1.10 
   8  -3   2    0.00    1.10 
   8  -3   2    1.80    1.10 
   8  -3   2    0.60    0.80 
  -9   3  -2    0.40    1.10 
  -9   3  -2    1.00    1.00 
  -9   3  -2    0.70    0.90 
   9  -3   2    0.60    1.30 
   9  -3   2   -0.60    0.90 
   9  -3   2   -0.20    0.70 
   9  -3   2   -0.10    1.00 
 -10   3  -2   55.69    4.00 
 -10   3  -2   49.99    3.90 
 -10   3  -2   47.90    3.50 
  10  -3   2   49.80    3.80 
  10  -3   2   46.30    5.10 
  10  -3   2   50.89    2.90 
  10  -3   2   57.99    4.50 
 -11   3  -2   75.29    4.60 
 -11   3  -2   69.39    4.80 
  11  -3   2   72.29    4.60 
  11  -3   2   65.79    5.10 
  11  -3   2   68.99    5.50 
 -12   3  -2   40.10    4.00 
 -12   3  -2   34.80    4.00 
  12  -3   2   34.10    3.80 
  12  -3   2   29.90    4.50 
  12  -3   2   33.50    4.60 
 -13   3  -2   14.90    2.70 
 -13   3  -2   13.30    2.70 
  13  -3   2   19.50    4.10 
  13  -3   2    9.90    2.30 
  13  -3   2   11.60    2.90 
 -14   3  -2    0.60    1.40 
 -14   3  -2    3.20    1.80 
  14  -3   2    3.30    1.60 
  14  -3   2    2.40    2.10 
  14  -3   2   -0.10    1.80 
 -15   3  -2   10.70    2.70 
 -15   3  -2   11.30    2.80 
  15  -3   2   18.30    4.10 
  15  -3   2    5.50    2.90 
  15  -3   2   10.80    2.50 
 -16   3  -2    4.50    2.10 
 -16   3  -2    7.80    2.50 
  16  -3   2    2.30    1.90 
  16  -3   2    6.80    2.90 
  16  -3   2    3.60    2.50 
 -17   3  -2    0.00    1.60 
 -17   3  -2    1.50    1.90 
  17  -3   2    0.20    1.90 
  17  -3   2    1.70    2.40 
  17  -3   2    2.40    1.80 
 -18   3  -2   15.30    3.70 
 -18   3  -2   18.60    3.60 
  18  -3   2    9.70    3.70 
  18  -3   2   10.90    3.70 
 -19   3  -2    0.80    1.90 
 -19   3  -2    0.30    2.30 
  19  -3   2    7.10    3.40 
  19  -3   2    0.80    3.20 
  19   2  -2    7.40    3.70 
  19   2  -2    3.80    2.80 
 -19  -2   2    2.30    1.40 
  18   2  -2   -0.50    2.30 
  18   2  -2    2.70    2.20 
 -18  -2   2    0.00    1.00 
  17   2  -2    2.00    2.50 
  17   2  -2    1.70    2.50 
  17   2  -2    7.70    2.90 
 -17  -2   2    5.40    1.50 
  16   2  -2    4.10    2.50 
  16   2  -2    7.70    2.60 
 -16  -2   2    8.50    1.70 
  15   2  -2   27.90    4.10 
 -15  -2   2   26.50    2.60 
  14   2  -2   38.30    4.60 
 -14  -2   2   44.80    2.80 
  13   2  -2   37.10    4.40 
  13   2  -2   35.80    5.20 
 -13  -2   2   35.90    2.30 
 -13  -2   2   30.30    2.20 
  12   2  -2   42.80    5.30 
  12   2  -2   48.70    4.90 
 -12  -2   2   43.50    2.50 
 -12  -2   2   45.10    2.50 
  11   2  -2   74.69    5.80 
  11   2  -2   83.79    5.10 
 -11  -2   2   84.09    2.80 
 -11  -2   2   75.49    3.30 
 -11  -2   2   78.69    3.30 
  10   2  -2   19.70    2.80 
  10   2  -2   14.90    3.00 
 -10  -2   2   18.10    1.40 
 -10  -2   2   17.50    1.30 
   9   2  -2   68.59    4.10 
   9   2  -2   72.59    5.00 
  -9  -2   2   64.19    2.50 
  -9  -2   2   64.19    2.50 
   8   2  -2   35.80    2.70 
  -8  -2   2   29.70    1.40 
  -8  -2   2   33.40    1.50 
   7   2  -2   10.30    1.70 
  -7  -2   2   10.30    0.70 
  -7  -2   2   10.30    0.70 
   6   2  -2  168.78    7.30 
   6   2  -2  170.08    6.10 
  -6  -2   2  173.68    4.70 
   5   2  -2  240.98    7.40 
   5   2  -2  225.08    8.60 
  -5  -2   2  231.78    6.10 
  -5  -2   2  226.98    6.10 
   4   2  -2   62.19    3.50 
   4   2  -2   62.59    2.70 
  -4  -2   2   60.99    2.00 
  -4  -2   2   65.49    2.00 
   3   2  -2   19.20    1.20 
   3   2  -2   19.20    0.90 
  -3  -2   2   18.50    1.00 
  -3  -2   2   20.40    1.00 
   2   2  -2  215.78    6.10 
  -2  -2   2  211.58    6.20 
  -2  -2   2  218.18    5.80 
  -2  -2   2  208.28    6.20 
  -2  -2   2  217.88    5.80 
   1   2  -2   59.39    2.40 
   1   2  -2   57.59    2.10 
   1   2  -2   63.59    2.40 
  -1  -2   2   56.39    2.40 
  -1  -2   2   57.39    2.40 
  -1  -2   2   56.49    2.20 
   0   2  -2  356.16   10.00 
   0   2  -2  339.47    9.60 
   0   2  -2  353.96    9.90 
   0  -2   2  350.76    9.70 
   0  -2   2  346.97   10.00 
   0  -2   2  340.67   10.00 
  -1   2  -2   97.79    3.70 
  -1   2  -2   96.79    3.70 
  -1   2  -2   89.29    3.50 
   1  -2   2   96.79    3.70 
   1  -2   2   96.59    3.70 
   1  -2   2   93.79    3.40 
   1  -2   2   92.29    3.50 
  -2   2  -2   63.89    3.00 
  -2   2  -2   63.69    2.80 
  -2   2  -2   58.99    2.90 
   2  -2   2   61.89    2.80 
   2  -2   2   61.79    2.90 
   2  -2   2   60.09    3.00 
  -3   2  -2  100.89    4.00 
  -3   2  -2  105.49    4.20 
  -3   2  -2   99.69    4.20 
   3  -2   2  105.39    4.00 
   3  -2   2   99.29    4.20 
   3  -2   2  101.69    4.10 
   3  -2   2   94.09    4.10 
  -4   2  -2  105.49    4.60 
  -4   2  -2  111.49    4.30 
  -4   2  -2  113.19    4.60 
   4  -2   2  115.69    4.70 
   4  -2   2  109.89    4.30 
   4  -2   2  113.19    4.50 
   4  -2   2  111.89    4.70 
  -5   2  -2   28.70    2.10 
  -5   2  -2   28.40    2.30 
  -5   2  -2   27.10    2.20 
  -5   2  -2   33.40    2.40 
   5  -2   2   26.40    2.70 
   5  -2   2   28.50    2.30 
   5  -2   2   29.70    2.20 
   5  -2   2   32.50    2.00 
  -6   2  -2   19.20    2.20 
  -6   2  -2   16.70    2.00 
  -6   2  -2   13.50    1.80 
  -6   2  -2   19.10    2.10 
   6  -2   2   21.90    2.00 
   6  -2   2   14.40    2.30 
   6  -2   2   18.50    2.10 
   6  -2   2   23.80    2.70 
   6  -2   2   13.70    1.90 
  -7   2  -2  151.98    5.80 
  -7   2  -2  155.48    6.20 
  -7   2  -2  139.59    6.00 
  -7   2  -2  139.39    5.90 
   7  -2   2  148.69    5.30 
   7  -2   2  139.39    5.90 
   7  -2   2  149.19    6.60 
   7  -2   2  145.39    6.90 
   7  -2   2  144.49    5.90 
  -8   2  -2  128.69    5.50 
  -8   2  -2  132.99    5.90 
  -8   2  -2  141.39    5.90 
  -8   2  -2  144.19    6.00 
   8  -2   2  135.29    6.90 
   8  -2   2  128.39    4.80 
   8  -2   2  125.49    6.30 
   8  -2   2  136.79    5.80 
  -9   2  -2   -0.90    0.80 
  -9   2  -2    0.00    0.80 
  -9   2  -2    0.70    1.00 
  -9   2  -2    0.70    0.80 
   9  -2   2    0.40    0.80 
   9  -2   2    1.40    0.70 
   9  -2   2    0.30    1.20 
   9  -2   2   -0.10    0.90 
 -10   2  -2   12.80    2.00 
 -10   2  -2   11.80    2.10 
 -10   2  -2   18.50    2.60 
  10  -2   2   18.10    3.20 
  10  -2   2    9.10    2.00 
  10  -2   2   15.40    2.80 
 -11   2  -2    3.30    1.30 
 -11   2  -2    3.90    1.50 
  11  -2   2    1.80    1.70 
  11  -2   2    3.40    1.50 
  11  -2   2    3.30    1.90 
 -12   2  -2    4.00    1.60 
 -12   2  -2    4.20    1.50 
  12  -2   2    3.20    2.10 
  12  -2   2    2.00    1.90 
  12  -2   2    3.60    1.50 
 -13   2  -2   -0.70    1.00 
 -13   2  -2    1.00    1.20 
  13  -2   2    1.90    2.00 
  13  -2   2   -1.10    1.30 
  13  -2   2    0.30    1.00 
 -14   2  -2   10.80    2.40 
 -14   2  -2    9.10    2.20 
  14  -2   2    6.40    1.90 
  14  -2   2   12.10    3.00 
  14  -2   2    6.20    2.60 
 -15   2  -2    6.00    2.00 
 -15   2  -2    3.00    1.80 
  15  -2   2    8.60    2.10 
  15  -2   2    5.90    2.60 
  15  -2   2    3.70    2.50 
 -16   2  -2   -0.30    1.40 
 -16   2  -2    0.30    1.20 
  16  -2   2    0.30    1.20 
  16  -2   2    0.20    1.90 
  16  -2   2    2.80    2.40 
 -17   2  -2    8.50    2.60 
 -17   2  -2    9.40    2.70 
  17  -2   2    4.00    3.30 
  17  -2   2   10.00    3.30 
 -18   2  -2   51.69    5.70 
 -18   2  -2   60.09    6.10 
  18  -2   2   51.59    7.60 
  18  -2   2   62.39    7.50 
 -19   2  -2   29.40    4.50 
 -19   2  -2   17.80    3.70 
  19  -2   2   18.70    4.80 
  19  -2   2   18.20    5.00 
  19   1  -2    2.00    3.00 
  19   1  -2   -1.30    1.90 
 -19  -1   2    0.00    1.30 
  18   1  -2    5.00    3.30 
  18   1  -2    6.90    2.80 
 -18  -1   2    9.80    2.10 
  17   1  -2    0.40    1.90 
  17   1  -2    0.40    2.10 
 -17  -1   2   -1.30    0.90 
  16   1  -2   30.00    5.30 
  16   1  -2   32.30    4.70 
 -16  -1   2   35.50    3.40 
  15   1  -2    0.20    1.90 
  15   1  -2    3.00    1.90 
 -15  -1   2    3.40    1.30 
  14   1  -2   15.40    3.70 
  14   1  -2   22.70    3.60 
 -14  -1   2   25.30    2.60 
  13   1  -2    5.50    2.40 
  13   1  -2    4.50    2.00 
 -13  -1   2    9.30    1.50 
 -13  -1   2    5.20    1.40 
  12   1  -2   43.10    5.30 
  12   1  -2   39.70    4.60 
 -12  -1   2   40.50    2.70 
 -12  -1   2   40.20    2.40 
 -12  -1   2   41.50    2.70 
  11   1  -2   50.19    4.00 
  11   1  -2   51.69    5.40 
 -11  -1   2   50.89    2.50 
 -11  -1   2   49.80    2.80 
 -11  -1   2   54.39    2.90 
  10   1  -2    3.00    1.60 
  10   1  -2    2.00    1.20 
 -10  -1   2    3.70    0.80 
 -10  -1   2    3.20    0.90 
 -10  -1   2    3.80    1.00 
   9   1  -2  128.39    6.90 
   9   1  -2  118.89    5.90 
  -9  -1   2  137.39    4.20 
  -9  -1   2  136.09    4.80 
  -9  -1   2  136.99    4.20 
  -9  -1   2  130.99    4.70 
   8   1  -2   47.50    3.80 
   8   1  -2   56.99    3.60 
  -8  -1   2   54.09    2.40 
  -8  -1   2   51.79    2.40 
  -8  -1   2   51.59    1.80 
  -8  -1   2   53.59    1.90 
   7   1  -2    4.40    1.30 
   7   1  -2    5.10    1.60 
  -7  -1   2    4.00    0.70 
  -7  -1   2    3.30    0.70 
   6   1  -2    1.40    0.90 
   6   1  -2    1.00    1.10 
  -6  -1   2    0.80    0.40 
  -6  -1   2    0.90    0.40 
   5   1  -2   86.79    4.30 
   5   1  -2   84.09    2.40 
   5   1  -2   79.09    3.60 
  -5  -1   2   85.49    2.70 
  -5  -1   2   81.39    2.70 
   4   1  -2  293.47    8.90 
   4   1  -2  297.17   10.00 
   4   1  -2  303.97    7.80 
   4   1  -2  306.87    7.80 
  -4  -1   2  293.47    8.10 
  -4  -1   2  300.67    8.10 
   3   1  -2   -0.60    0.70 
   3   1  -2    0.30    0.30 
   3   1  -2    0.10    0.60 
  -3  -1   2   -0.10    0.30 
   2   1  -2   36.80    1.40 
   2   1  -2   33.80    2.00 
  -2  -1   2   35.90    1.40 
  -2  -1   2   36.30    1.40 
   1   1  -2    3.60    0.60 
   1   1  -2    4.20    0.60 
   1   1  -2    3.10    0.40 
  -1  -1   2    3.70    0.50 
  -1  -1   2    3.30    0.50 
  -1  -1   2    4.10    0.50 
  -1  -1   2    3.00    0.50 
   0   1  -2    3.00    0.60 
   0   1  -2    3.60    0.60 
   0  -1   2    4.30    0.70 
   0  -1   2    3.20    0.60 
   0  -1   2    3.60    0.70 
  -1   1  -2   85.19    3.00 
  -1   1  -2   84.19    2.90 
  -1   1  -2   81.09    3.20 
   1  -1   2   83.69    3.00 
   1  -1   2   81.19    2.90 
   1  -1   2   82.39    3.00 
   1  -1   2   77.79    2.90 
  -2   1  -2  110.49    4.00 
  -2   1  -2  118.59    4.10 
  -2   1  -2  120.49    3.90 
  -2   1  -2  113.69    4.00 
   2  -1   2  112.29    4.00 
   2  -1   2  117.79    4.10 
   2  -1   2  118.49    4.10 
   2  -1   2  111.29    3.80 
  -3   1  -2  167.18    5.30 
  -3   1  -2  165.28    5.60 
  -3   1  -2  159.78    5.40 
  -3   1  -2  178.18    5.60 
   3  -1   2  162.88    5.50 
   3  -1   2  164.08    5.20 
   3  -1   2  170.48    5.50 
  -4   1  -2   15.40    1.70 
  -4   1  -2   20.30    1.80 
  -4   1  -2   14.90    1.50 
  -4   1  -2   17.00    1.50 
   4  -1   2   17.40    1.30 
   4  -1   2   17.90    1.80 
   4  -1   2   18.80    1.70 
   4  -1   2   18.80    2.00 
   4  -1   2   16.90    2.10 
  -5   1  -2    1.70    0.80 
  -5   1  -2    0.10    0.60 
  -5   1  -2    0.30    0.70 
  -5   1  -2   -0.20    0.60 
   5  -1   2   -0.80    0.60 
   5  -1   2    1.50    0.80 
   5  -1   2    0.60    0.90 
   5  -1   2    0.90    0.90 
   5  -1   2    1.30    0.60 
  -6   1  -2   56.09    3.00 
  -6   1  -2   58.29    2.90 
  -6   1  -2   65.29    3.20 
  -6   1  -2   59.99    3.10 
   6  -1   2   58.99    3.70 
   6  -1   2   61.79    2.50 
   6  -1   2   53.59    3.00 
   6  -1   2   60.39    3.50 
  -7   1  -2   47.30    2.60 
  -7   1  -2   46.70    2.80 
  -7   1  -2   42.90    2.80 
  -7   1  -2   44.20    2.80 
   7  -1   2   44.10    3.50 
   7  -1   2   42.80    2.70 
   7  -1   2   46.70    2.00 
   7  -1   2   50.29    3.40 
  -8   1  -2   11.30    1.80 
  -8   1  -2   12.20    1.80 
  -8   1  -2   14.90    1.80 
  -8   1  -2   12.20    1.90 
   8  -1   2   15.60    2.60 
   8  -1   2   14.60    2.30 
   8  -1   2   13.40    0.90 
   8  -1   2   15.70    2.00 
  -9   1  -2   17.00    2.10 
  -9   1  -2   18.70    2.30 
  -9   1  -2   12.80    1.90 
  -9   1  -2   14.60    1.90 
   9  -1   2   19.00    2.30 
   9  -1   2   14.00    2.50 
   9  -1   2   17.20    2.80 
 -10   1  -2   31.60    2.90 
 -10   1  -2   30.80    3.00 
 -10   1  -2   27.90    3.00 
  10  -1   2   32.10    3.80 
  10  -1   2   28.20    2.80 
  10  -1   2   24.10    3.60 
 -11   1  -2   21.10    2.70 
 -11   1  -2   18.80    2.40 
  11  -1   2   17.40    3.40 
  11  -1   2   21.30    2.50 
  11  -1   2   22.10    3.40 
 -12   1  -2    6.10    1.70 
 -12   1  -2   11.70    2.00 
  12  -1   2    9.70    1.80 
  12  -1   2    6.60    2.20 
  12  -1   2    7.90    2.40 
 -13   1  -2    1.80    1.30 
 -13   1  -2    2.00    1.20 
  13  -1   2    3.80    2.10 
  13  -1   2    1.80    1.20 
  13  -1   2    4.00    2.20 
 -14   1  -2    4.10    1.60 
 -14   1  -2    4.90    1.70 
  14  -1   2    1.70    1.30 
  14  -1   2    6.30    2.70 
  14  -1   2    0.80    1.60 
 -15   1  -2    4.30    1.60 
 -15   1  -2    3.40    1.70 
  15  -1   2    2.40    1.30 
  15  -1   2    6.10    2.50 
  15  -1   2    2.40    2.40 
 -16   1  -2   -0.70    1.40 
 -16   1  -2   -0.40    1.20 
  16  -1   2    2.90    2.30 
  16  -1   2   -2.10    1.50 
 -17   1  -2    1.70    1.40 
 -17   1  -2   -0.10    1.60 
  17  -1   2   -0.10    2.10 
  17  -1   2    1.60    2.40 
 -18   1  -2    1.90    1.60 
  18  -1   2   -2.80    2.20 
  18  -1   2    0.10    2.20 
 -19   1  -2   17.30    3.30 
  19  -1   2   16.50    4.30 
  19  -1   2   14.50    4.40 
  19   0  -2   17.90    4.90 
  19   0  -2   18.10    4.50 
 -19   0   2   18.70    3.10 
  18   0  -2    4.20    2.90 
  18   0  -2    2.80    2.40 
 -18   0   2    4.10    1.90 
  17   0  -2    8.20    3.30 
  17   0  -2   14.00    3.60 
 -17   0   2   14.70    2.60 
  16   0  -2   -0.20    2.00 
  16   0  -2    0.70    2.10 
 -16   0   2    4.30    1.60 
  15   0  -2   19.20    3.80 
  15   0  -2   19.10    4.30 
 -15   0   2   20.80    2.80 
 -15   0   2   17.60    2.50 
  14   0  -2    9.50    2.70 
  14   0  -2    8.80    2.80 
 -14   0   2   12.80    2.10 
 -14   0   2    9.10    1.80 
  13   0  -2    0.60    1.60 
  13   0  -2   -0.50    1.40 
  13   0  -2   -0.20    0.70 
 -13   0   2    0.30    0.90 
 -13   0   2    1.00    1.00 
  12   0  -2   16.40    3.20 
  12   0  -2   21.20    1.90 
  12   0  -2   16.60    3.10 
 -12   0   2   16.50    2.00 
 -12   0   2   17.80    2.30 
  11   0  -2  347.47   14.00 
  11   0  -2  352.16   10.20 
  11   0  -2  328.07   12.70 
 -11   0   2  326.97   11.20 
 -11   0   2  348.07   11.20 
 -11   0   2  365.56   10.70 
  10   0  -2   23.80    3.30 
  10   0  -2   24.50    1.70 
  10   0  -2   23.30    3.50 
 -10   0   2   27.00    2.40 
 -10   0   2   23.00    1.80 
 -10   0   2   20.20    2.10 
   9   0  -2    3.40    0.90 
   9   0  -2    6.50    1.80 
   9   0  -2    1.40    1.30 
  -9   0   2    5.00    1.00 
  -9   0   2    3.40    0.90 
  -9   0   2    3.40    1.00 
   8   0  -2   14.70    2.60 
   8   0  -2   17.60    2.40 
   8   0  -2   13.00    1.40 
  -8   0   2   13.30    1.60 
  -8   0   2   17.20    1.50 
  -8   0   2   16.20    1.70 
   7   0  -2  428.76   13.50 
   7   0  -2  431.06   12.00 
   7   0  -2  424.46   14.60 
  -7   0   2  422.46   12.30 
  -7   0   2  431.46   12.30 
  -7   0   2  423.36   11.70 
   6   0  -2   49.90    3.20 
   6   0  -2   55.49    3.50 
   6   0  -2   55.19    2.40 
  -6   0   2   55.19    2.50 
  -6   0   2   55.69    2.20 
  -6   0   2   56.49    2.50 
   5   0  -2    0.90    0.90 
   5   0  -2    0.40    0.50 
   5   0  -2   -0.40    0.50 
   5   0  -2    0.10    0.80 
  -5   0   2   -0.30    0.40 
  -5   0   2    0.70    0.50 
  -5   0   2   -0.10    0.50 
  -5   0   2    0.40    0.40 
   4   0  -2 1402.96   39.70 
   4   0  -2 1429.36   36.10 
   4   0  -2 1391.36   36.80 
  -4   0   2 1414.26   35.60 
  -4   0   2 1371.66   36.70 
  -4   0   2 1458.15   36.80 
  -4   0   2 1414.16   35.60 
   3   0  -2 1241.58   30.50 
   3   0  -2 1228.68   31.30 
   3   0  -2 1184.08   34.10 
   3   0  -2 1212.78   31.80 
  -3   0   2 1220.38   30.90 
  -3   0   2 1246.18   30.90 
  -3   0   2 1187.18   31.80 
  -3   0   2 1277.47   31.90 
   2   0  -2  113.19    3.30 
   2   0  -2  117.19    3.50 
   2   0  -2  110.69    4.00 
   2   0  -2  117.89    3.50 
  -2   0   2  113.79    3.60 
  -2   0   2  113.49    3.40 
  -2   0   2  114.59    3.60 
  -2   0   2  116.49    3.40 
   1   0  -2    8.90    0.80 
   1   0  -2    8.30    0.70 
   1   0  -2    7.10    0.70 
  -1   0   2    7.50    0.60 
  -1   0   2    7.90    0.70 
  -1   0   2    8.80    0.70 
   0   0  -2  193.38    5.70 
   0   0  -2  204.08    5.50 
   0   0   2  199.88    5.70 
   0   0   2  197.08    5.70 
  -1   0  -2   19.90    1.10 
  -1   0  -2   21.10    1.10 
   1   0   2   20.30    1.00 
  -2   0  -2 1783.22   44.70 
  -2   0  -2 1749.03   45.90 
  -2   0  -2 1758.02   45.90 
   2   0   2 1792.72   45.10 
   2   0   2 1776.72   44.60 
   2   0   2 1796.62   48.50 
   2   0   2 1772.52   45.20 
  -3   0  -2  231.18    7.10 
  -3   0  -2  241.68    6.80 
  -3   0  -2  241.78    7.10 
   3   0   2  238.28    7.40 
   3   0   2  240.58    7.90 
   3   0   2  238.18    6.60 
   3   0   2  246.28    7.00 
   3   0   2  243.28    7.00 
  -4   0  -2  109.99    4.00 
  -4   0  -2  110.69    3.70 
  -4   0  -2  118.59    4.10 
   4   0   2  111.39    4.70 
   4   0   2  122.39    4.10 
   4   0   2  113.89    4.50 
   4   0   2  117.79    3.40 
  -5   0  -2  561.64   14.90 
  -5   0  -2  530.75   15.50 
  -5   0  -2  565.94   15.50 
   5   0   2  562.84   16.10 
   5   0   2  551.44   17.30 
   5   0   2  572.24   14.10 
   5   0   2  554.84   15.30 
  -6   0  -2  249.18    7.40 
  -6   0  -2  246.48    7.90 
  -6   0  -2  252.77    7.80 
   6   0   2  247.18    9.30 
   6   0   2  241.78    8.60 
   6   0   2  255.17    7.70 
  -7   0  -2  147.19    5.00 
  -7   0  -2  150.88    5.50 
  -7   0  -2  152.48    5.40 
   7   0   2  142.39    5.20 
   7   0   2  147.69    6.30 
   7   0   2  147.89    6.80 
  -8   0  -2  112.99    4.80 
  -8   0  -2  125.19    4.90 
  -8   0  -2  123.79    4.50 
   8   0   2  119.79    4.60 
   8   0   2  132.39    6.50 
   8   0   2  119.89    5.80 
  -9   0  -2    5.60    1.20 
  -9   0  -2   10.30    1.60 
  -9   0  -2   10.00    1.40 
   9   0   2    8.00    2.00 
   9   0   2    6.50    1.80 
   9   0   2    6.60    1.20 
 -10   0  -2  115.29    5.20 
 -10   0  -2  126.99    5.00 
 -10   0  -2  122.59    5.30 
  10   0   2  135.19    6.60 
  10   0   2  127.79    7.10 
  10   0   2  126.49    4.90 
 -11   0  -2    0.40    0.90 
 -11   0  -2    1.40    1.00 
 -11   0  -2    2.70    1.20 
  11   0   2    3.00    1.00 
  11   0   2    0.80    1.50 
  11   0   2   -0.10    1.40 
 -12   0  -2   24.40    2.60 
 -12   0  -2   20.40    2.60 
  12   0   2   23.40    3.70 
  12   0   2   26.90    4.10 
  12   0   2   21.00    2.20 
 -13   0  -2    6.10    1.60 
 -13   0  -2    8.20    1.90 
  13   0   2   12.00    1.60 
  13   0   2    5.40    2.20 
  13   0   2    3.80    2.30 
 -14   0  -2   89.59    5.10 
 -14   0  -2   94.39    4.90 
  14   0   2   87.99    3.90 
  14   0   2   94.49    6.50 
  14   0   2   88.19    6.90 
 -15   0  -2   35.00    3.60 
 -15   0  -2   40.20    4.00 
  15   0   2   25.80    4.70 
  15   0   2   34.60    4.90 
 -16   0  -2   32.10    3.60 
 -16   0  -2   30.10    3.70 
  16   0   2   30.80    5.60 
  16   0   2   33.80    5.20 
 -17   0  -2    5.80    2.00 
  17   0   2    3.40    2.90 
  17   0   2    1.20    2.20 
 -18   0  -2   14.70    2.80 
  18   0   2   14.40    4.10 
  18   0   2   14.00    3.80 
 -19   0  -2   19.60    3.30 
  19   0   2   14.20    4.20 
  19   0   2    9.70    3.80 
  19  -1  -2    2.60    2.80 
  19  -1  -2   -1.70    2.20 
 -19   1   2    2.20    1.70 
  18  -1  -2    7.70    3.00 
  18  -1  -2    9.70    3.80 
 -18   1   2    3.90    2.00 
  17  -1  -2    0.60    1.90 
  17  -1  -2   -0.40    1.70 
 -17   1   2   -0.70    1.20 
 -17   1   2   -0.50    1.40 
  16  -1  -2   31.00    5.50 
  16  -1  -2   37.00    5.60 
 -16   1   2   36.00    4.10 
 -16   1   2   47.00    4.50 
  15  -1  -2    4.00    1.30 
  15  -1  -2    5.10    2.50 
  15  -1  -2    5.80    2.50 
 -15   1   2    4.50    1.70 
 -15   1   2    2.50    1.40 
  14  -1  -2   24.10    4.20 
  14  -1  -2   28.00    2.70 
  14  -1  -2   25.90    4.30 
 -14   1   2   26.40    3.30 
 -14   1   2   25.10    3.00 
  13  -1  -2    6.30    2.50 
  13  -1  -2    5.40    2.30 
  13  -1  -2    6.90    1.50 
 -13   1   2   10.10    1.90 
 -13   1   2    6.70    1.80 
  12  -1  -2   40.90    4.60 
  12  -1  -2   34.50    4.70 
  12  -1  -2   38.80    2.70 
 -12   1   2   36.60    3.50 
 -12   1   2   32.30    3.10 
  11  -1  -2   43.40    4.70 
  11  -1  -2   57.89    5.70 
  11  -1  -2   43.10    2.90 
 -11   1   2   52.89    3.20 
 -11   1   2   50.79    3.40 
  10  -1  -2    1.40    1.30 
  10  -1  -2    2.30    1.50 
  10  -1  -2    1.90    1.00 
 -10   1   2    4.50    1.20 
 -10   1   2    2.50    1.20 
 -10   1   2    1.70    0.90 
   9  -1  -2  128.29    6.80 
   9  -1  -2  135.79    5.30 
  -9   1   2  130.39    5.40 
  -9   1   2  122.39    5.30 
  -9   1   2  130.09    5.40 
  -9   1   2  127.89    5.00 
   8  -1  -2   49.50    3.60 
   8  -1  -2   50.99    2.90 
   8  -1  -2   53.79    3.90 
  -8   1   2   48.70    3.00 
  -8   1   2   53.89    2.80 
  -8   1   2   52.69    3.00 
  -8   1   2   43.50    2.80 
   7  -1  -2    3.80    0.50 
   7  -1  -2    4.10    1.40 
   7  -1  -2    3.10    1.00 
   7  -1  -2    3.30    1.30 
  -7   1   2    6.30    1.40 
  -7   1   2    4.70    1.10 
  -7   1   2    3.50    1.00 
  -7   1   2    3.70    1.00 
   6  -1  -2    2.00    0.50 
   6  -1  -2    1.20    1.00 
   6  -1  -2    1.30    1.00 
   6  -1  -2    1.30    0.70 
  -6   1   2   -0.50    0.60 
  -6   1   2    0.60    0.70 
  -6   1   2   -0.70    0.60 
   5  -1  -2   80.89    3.50 
   5  -1  -2   81.09    2.90 
   5  -1  -2   80.49    4.10 
   5  -1  -2   87.99    3.50 
   5  -1  -2   79.49    3.90 
  -5   1   2   77.79    3.20 
  -5   1   2   85.29    3.50 
  -5   1   2   82.99    3.50 
   4  -1  -2  302.07    8.90 
   4  -1  -2  292.47    9.80 
   4  -1  -2  313.77    9.40 
   4  -1  -2  304.47    8.40 
   4  -1  -2  296.67    8.90 
  -4   1   2  292.87    8.60 
  -4   1   2  287.07    8.90 
  -4   1   2  301.27    9.00 
   3  -1  -2   -0.10    0.60 
   3  -1  -2    0.70    0.80 
   3  -1  -2    1.30    0.60 
   3  -1  -2   -0.20    0.50 
   3  -1  -2    0.00    0.70 
  -3   1   2    0.40    0.60 
  -3   1   2   -0.50    0.50 
  -3   1   2    1.20    0.60 
   2  -1  -2   38.10    1.80 
   2  -1  -2   34.20    1.80 
   2  -1  -2   36.70    1.90 
   2  -1  -2   35.10    1.90 
   2  -1  -2   34.70    1.70 
  -2   1   2   38.10    1.90 
  -2   1   2   37.00    1.90 
  -2   1   2   37.10    1.70 
   1  -1  -2    4.10    0.70 
   1  -1  -2    4.50    0.70 
   1  -1  -2    4.60    0.50 
  -1   1   2    3.90    0.70 
  -1   1   2    2.60    0.60 
   0  -1  -2    3.00    0.60 
   0  -1  -2    4.00    0.60 
   0  -1  -2    3.40    0.60 
   0   1   2    2.80    0.60 
   0   1   2    3.20    0.70 
   0   1   2    4.30    0.60 
  -1  -1  -2   79.29    2.60 
  -1  -1  -2   82.59    2.80 
  -1  -1  -2   80.39    2.80 
   1   1   2   80.19    2.70 
   1   1   2   82.69    2.60 
   1   1   2   80.89    2.80 
   1   1   2   83.89    2.80 
  -2  -1  -2  116.29    3.70 
  -2  -1  -2  119.79    3.40 
  -2  -1  -2  116.39    3.50 
  -2  -1  -2  118.99    3.70 
   2   1   2  111.89    4.00 
   2   1   2  117.69    3.70 
   2   1   2  113.19    3.20 
  -3  -1  -2  165.48    4.60 
  -3  -1  -2  166.08    4.70 
  -3  -1  -2  167.08    5.00 
  -3  -1  -2  164.98    5.00 
   3   1   2  161.18    5.80 
   3   1   2  166.68    5.40 
   3   1   2  168.28    4.90 
  -4  -1  -2   16.50    0.90 
  -4  -1  -2   17.20    1.20 
  -4  -1  -2   15.50    0.90 
   4   1   2   17.90    1.70 
   4   1   2   16.10    1.90 
   4   1   2   17.50    1.10 
  -5  -1  -2    0.70    0.40 
  -5  -1  -2    0.50    0.40 
  -5  -1  -2    1.10    0.50 
  -5  -1  -2    0.80    0.50 
   5   1   2    2.30    1.10 
   5   1   2    1.10    0.50 
   5   1   2    0.50    0.80 
  -6  -1  -2   57.19    2.60 
  -6  -1  -2   59.89    2.20 
  -6  -1  -2   56.09    2.50 
  -6  -1  -2   61.69    2.20 
   6   1   2   57.29    3.60 
   6   1   2   66.49    3.40 
   6   1   2   62.39    2.40 
  -7  -1  -2   44.20    2.30 
  -7  -1  -2   48.00    2.40 
  -7  -1  -2   45.80    2.00 
   7   1   2   53.89    3.30 
   7   1   2   46.40    2.10 
   7   1   2   48.90    3.60 
  -8  -1  -2   12.70    1.50 
  -8  -1  -2   15.20    1.60 
  -8  -1  -2   16.50    1.40 
   8   1   2   13.60    1.30 
   8   1   2   12.10    2.10 
   8   1   2    9.00    2.20 
  -9  -1  -2   18.00    1.80 
  -9  -1  -2   16.20    1.80 
  -9  -1  -2   18.10    1.60 
   9   1   2   15.50    2.80 
   9   1   2   14.60    2.30 
   9   1   2   16.90    1.30 
 -10  -1  -2   29.70    1.90 
 -10  -1  -2   29.30    2.20 
 -10  -1  -2   29.60    2.20 
  10   1   2   35.70    3.80 
  10   1   2   24.10    1.60 
  10   1   2   27.40    3.80 
 -11  -1  -2   18.60    2.20 
 -11  -1  -2   24.70    2.20 
 -11  -1  -2   20.50    2.30 
  11   1   2   19.60    2.90 
  11   1   2   16.70    3.20 
  11   1   2   22.80    1.40 
 -12  -1  -2    8.60    1.60 
 -12  -1  -2   10.80    1.60 
  12   1   2   10.10    2.90 
  12   1   2    9.40    1.00 
  12   1   2   10.30    2.50 
 -13  -1  -2    2.90    1.10 
 -13  -1  -2    0.10    0.80 
  13   1   2    2.80    1.70 
  13   1   2    4.40    2.20 
 -14  -1  -2    3.60    1.40 
 -14  -1  -2    3.90    1.40 
  14   1   2    2.90    2.20 
  14   1   2    5.70    2.30 
 -15  -1  -2    3.30    1.30 
  15   1   2    0.80    1.90 
  15   1   2    3.90    2.40 
 -16  -1  -2    1.90    1.30 
  16   1   2    0.70    2.00 
  16   1   2    2.00    1.90 
 -17  -1  -2    0.70    1.20 
  17   1   2    0.60    2.00 
  17   1   2    0.70    2.60 
 -18  -1  -2    3.90    1.60 
  18   1   2    1.10    2.00 
  18   1   2   -0.30    2.70 
 -19  -1  -2   14.70    2.70 
  19   1   2   14.20    4.60 
  19   1   2   14.10    3.90 
  19  -2  -2    4.80    3.20 
  19  -2  -2    4.60    2.90 
 -19   2   2    0.80    1.80 
  18  -2  -2   -2.80    1.70 
  18  -2  -2    2.50    2.60 
 -18   2   2    0.90    1.50 
 -18   2   2    1.80    1.60 
  17  -2  -2    7.60    3.00 
  17  -2  -2    5.80    2.90 
 -17   2   2    3.50    2.00 
 -17   2   2    3.90    2.00 
  16  -2  -2    5.90    3.00 
  16  -2  -2    5.70    2.80 
  16  -2  -2    7.70    1.90 
 -16   2   2   12.10    2.60 
 -16   2   2    7.80    2.30 
  15  -2  -2   31.70    4.90 
  15  -2  -2   30.60    3.30 
  15  -2  -2   28.20    4.90 
 -15   2   2   31.00    3.90 
 -15   2   2   31.10    3.80 
  14  -2  -2   41.10    5.50 
  14  -2  -2   44.50    5.60 
  14  -2  -2   45.40    3.40 
 -14   2   2   39.50    4.40 
 -14   2   2   46.80    3.70 
  13  -2  -2   37.50    5.00 
  13  -2  -2   30.30    3.30 
  13  -2  -2   32.10    4.90 
 -13   2   2   29.20    3.60 
 -13   2   2   28.70    3.30 
  12  -2  -2   41.30    3.20 
  12  -2  -2   45.70    5.20 
  12  -2  -2   42.70    5.20 
 -12   2   2   44.60    3.40 
 -12   2   2   44.40    3.60 
  11  -2  -2   79.19    5.40 
  11  -2  -2   73.19    4.30 
  11  -2  -2   84.59    6.00 
 -11   2   2   79.39    4.70 
 -11   2   2   82.09    4.40 
  10  -2  -2   14.40    2.90 
  10  -2  -2   17.10    2.30 
  10  -2  -2   19.20    3.00 
 -10   2   2   20.60    2.60 
 -10   2   2   15.20    2.20 
 -10   2   2   17.60    2.30 
   9  -2  -2   62.29    3.80 
   9  -2  -2   66.99    4.50 
   9  -2  -2   78.09    5.00 
   9  -2  -2   70.49    2.70 
  -9   2   2   64.79    3.60 
  -9   2   2   63.09    3.80 
  -9   2   2   61.49    3.80 
  -9   2   2   63.69    3.90 
   8  -2  -2   33.10    3.50 
   8  -2  -2   29.20    1.80 
   8  -2  -2   35.90    3.90 
   8  -2  -2   32.30    2.60 
  -8   2   2   26.60    2.70 
  -8   2   2   28.70    2.80 
  -8   2   2   34.10    2.70 
  -8   2   2   31.70    2.40 
   7  -2  -2    8.50    1.60 
   7  -2  -2   10.20    1.30 
   7  -2  -2    9.70    1.90 
   7  -2  -2   10.00    2.10 
  -7   2   2   10.80    1.70 
  -7   2   2    9.60    1.50 
  -7   2   2   11.20    1.80 
  -7   2   2   11.00    1.80 
   6  -2  -2  167.18    5.80 
   6  -2  -2  173.28    6.40 
   6  -2  -2  176.08    6.40 
   6  -2  -2  178.38    6.50 
   6  -2  -2  175.78    7.20 
   6  -2  -2  174.18    6.90 
  -6   2   2  174.58    6.50 
  -6   2   2  165.18    6.40 
  -6   2   2  182.38    6.20 
  -6   2   2  168.08    6.40 
   5  -2  -2  222.48    7.30 
   5  -2  -2  243.28    8.00 
   5  -2  -2  237.88    8.60 
   5  -2  -2  229.88    8.20 
   5  -2  -2  242.98    7.90 
  -5   2   2  222.58    7.80 
  -5   2   2  228.08    7.80 
  -5   2   2  244.88    7.60 
   4  -2  -2   64.69    3.40 
   4  -2  -2   67.09    3.40 
   4  -2  -2   64.79    3.00 
   4  -2  -2   62.19    3.10 
   4  -2  -2   63.79    3.10 
  -4   2   2   64.99    3.20 
  -4   2   2   63.69    3.20 
  -4   2   2   66.89    3.50 
  -4   2   2   60.89    2.90 
   3  -2  -2   26.60    2.30 
   3  -2  -2   20.60    1.60 
   3  -2  -2   24.70    2.10 
   3  -2  -2   19.60    1.90 
   3  -2  -2   19.50    2.00 
  -3   2   2   24.20    2.10 
  -3   2   2   24.00    2.20 
  -3   2   2   19.90    1.60 
   2  -2  -2  212.38    6.70 
   2  -2  -2  211.98    6.60 
   2  -2  -2  205.18    6.80 
   2  -2  -2  204.68    6.80 
  -2   2   2  217.58    6.80 
  -2   2   2  215.78    6.90 
  -2   2   2  215.28    6.60 
   1  -2  -2   58.19    2.70 
   1  -2  -2   57.49    2.70 
   1  -2  -2   56.39    2.50 
  -1   2   2   58.29    2.70 
  -1   2   2   61.99    2.70 
  -1   2   2   56.99    2.50 
   0  -2  -2  335.87    9.90 
   0  -2  -2  345.97    9.90 
   0  -2  -2  354.26    9.80 
   0  -2  -2  343.57    9.60 
   0   2   2  327.17    9.70 
   0   2   2  348.07    9.90 
   0   2   2  339.67    9.50 
  -1  -2  -2   93.19    3.40 
  -1  -2  -2   90.69    3.40 
  -1  -2  -2   88.59    3.20 
   1   2   2  102.99    3.40 
   1   2   2   91.29    3.30 
   1   2   2   93.29    3.10 
  -2  -2  -2   63.89    2.30 
  -2  -2  -2   63.09    2.40 
  -2  -2  -2   60.29    2.40 
   2   2   2   62.99    2.40 
   2   2   2   59.69    1.90 
   2   2   2   58.09    2.70 
  -3  -2  -2   98.99    3.00 
  -3  -2  -2   99.39    3.00 
  -3  -2  -2  103.29    3.40 
  -3  -2  -2   97.19    3.40 
   3   2   2  104.69    3.30 
   3   2   2   96.59    4.10 
  -4  -2  -2  110.49    3.70 
  -4  -2  -2  115.69    3.20 
  -4  -2  -2  114.29    3.70 
  -4  -2  -2  110.49    3.20 
   4   2   2  113.19    3.50 
   4   2   2  109.39    4.80 
   4   2   2  120.79    4.20 
  -5  -2  -2   31.10    1.60 
  -5  -2  -2   32.20    1.60 
   5   2   2   31.10    1.40 
   5   2   2   30.40    2.50 
   5   2   2   29.00    2.10 
  -6  -2  -2   16.80    1.20 
  -6  -2  -2   18.10    0.70 
  -6  -2  -2   18.10    0.70 
   6   2   2   17.80    2.40 
   6   2   2   18.30    0.90 
   6   2   2   20.70    2.10 
  -7  -2  -2  143.39    3.90 
  -7  -2  -2  145.39    4.70 
  -7  -2  -2  142.29    4.00 
  -7  -2  -2  138.49    4.70 
   7   2   2  136.49    5.70 
   7   2   2  135.59    6.50 
  -8  -2  -2  134.89    4.70 
  -8  -2  -2  139.39    4.70 
  -8  -2  -2  138.29    4.10 
  -8  -2  -2  140.29    4.10 
  -8  -2  -2  134.39    4.10 
   8   2   2  136.59    5.90 
   8   2   2  136.29    6.80 
  -9  -2  -2    0.50    0.50 
  -9  -2  -2   -0.10    0.40 
  -9  -2  -2    0.40    0.50 
  -9  -2  -2    0.00    0.50 
   9   2   2   -0.40    1.00 
   9   2   2    0.60    1.00 
 -10  -2  -2   12.80    1.50 
 -10  -2  -2   13.00    1.50 
 -10  -2  -2   14.80    1.40 
  10   2   2    9.80    2.50 
  10   2   2   12.70    2.20 
 -11  -2  -2    3.80    1.00 
 -11  -2  -2    3.60    1.00 
 -11  -2  -2    2.50    0.90 
  11   2   2    5.30    2.20 
  11   2   2    3.40    1.60 
 -12  -2  -2    3.90    1.10 
 -12  -2  -2    4.50    1.20 
 -12  -2  -2    2.50    0.90 
  12   2   2    1.60    1.80 
  12   2   2    1.70    1.50 
 -13  -2  -2    0.50    0.80 
  13   2   2   -1.50    1.40 
  13   2   2   -0.30    1.30 
 -14  -2  -2    7.70    1.60 
  14   2   2    4.70    2.00 
  14   2   2    8.20    2.90 
 -15  -2  -2    3.50    1.30 
  15   2   2    3.40    2.40 
  15   2   2    7.60    2.40 
 -16  -2  -2    1.20    1.10 
  16   2   2    0.10    2.00 
  16   2   2   -0.50    1.70 
 -17  -2  -2    6.90    1.80 
  17   2   2    4.80    2.90 
  17   2   2    5.90    2.80 
 -18  -2  -2   62.39    4.20 
  18   2   2   49.10    7.60 
  18   2   2   47.90    6.30 
 -19  -2  -2   17.30    2.70 
  19   2   2    0.10    2.90 
  19   2   2   18.30    4.30 
  19  -3  -2    3.80    3.10 
  19  -3  -2    0.80    2.60 
 -19   3   2    2.50    2.00 
 -19   3   2    3.50    2.40 
  18  -3  -2    0.20    2.40 
  18  -3  -2    3.50    2.70 
 -18   3   2   -1.50    1.50 
 -18   3   2    0.20    1.80 
  17  -3  -2   -0.20    2.30 
  17  -3  -2   -0.30    1.30 
  17  -3  -2   -1.10    1.80 
 -17   3   2    0.40    1.60 
 -17   3   2    2.70    1.90 
  16  -3  -2    7.90    2.10 
  16  -3  -2    8.90    3.20 
  16  -3  -2    3.70    2.60 
 -16   3   2    9.00    2.60 
 -16   3   2    3.80    1.90 
  15  -3  -2   -1.90    1.50 
  15  -3  -2    6.20    2.00 
  15  -3  -2    1.30    2.00 
 -15   3   2    4.90    1.90 
 -15   3   2    2.70    1.90 
  14  -3  -2   23.90    4.40 
  14  -3  -2   26.20    4.50 
  14  -3  -2   24.00    3.40 
 -14   3   2   27.90    3.60 
 -14   3   2   21.70    3.40 
  13  -3  -2    5.50    2.30 
  13  -3  -2   10.30    2.90 
  13  -3  -2   12.70    2.50 
 -13   3   2    8.50    2.10 
 -13   3   2    7.10    2.00 
  12  -3  -2   15.60    3.20 
  12  -3  -2   12.20    3.00 
  12  -3  -2   11.70    2.40 
 -12   3   2   13.80    2.60 
 -12   3   2   13.40    2.50 
  11  -3  -2    2.10    1.80 
  11  -3  -2    1.20    1.50 
  11  -3  -2    2.60    1.50 
 -11   3   2   -0.50    1.10 
 -11   3   2    0.40    1.00 
  10  -3  -2    0.30    1.10 
  10  -3  -2   -0.80    1.20 
  10  -3  -2    0.80    0.80 
  10  -3  -2   -1.00    1.10 
 -10   3   2    0.70    1.00 
 -10   3   2    1.00    1.10 
 -10   3   2    0.20    0.90 
   9  -3  -2    8.90    1.50 
   9  -3  -2    9.10    2.20 
   9  -3  -2   11.80    2.60 
   9  -3  -2   10.20    2.00 
  -9   3   2   12.00    2.00 
  -9   3   2   10.20    2.10 
  -9   3   2   10.10    1.90 
   8  -3  -2   36.80    4.00 
   8  -3  -2   37.80    3.00 
   8  -3  -2   34.90    2.90 
   8  -3  -2   35.90    2.50 
   8  -3  -2   41.60    4.20 
  -8   3   2   36.60    3.00 
  -8   3   2   40.40    3.10 
  -8   3   2   41.80    3.00 
  -8   3   2   45.00    3.30 
   7  -3  -2   -1.00    0.80 
   7  -3  -2   -1.00    0.80 
   7  -3  -2    0.10    1.00 
   7  -3  -2   -0.30    0.70 
   7  -3  -2   -0.90    0.70 
  -7   3   2    0.60    0.90 
  -7   3   2   -0.20    0.70 
  -7   3   2    0.70    0.90 
   6  -3  -2    1.10    0.90 
   6  -3  -2   -0.60    0.90 
   6  -3  -2    0.70    1.10 
   6  -3  -2    1.70    1.00 
   6  -3  -2   -0.70    0.80 
   6  -3  -2    1.20    0.90 
  -6   3   2    0.60    0.90 
  -6   3   2    0.80    0.90 
  -6   3   2    0.70    1.00 
   5  -3  -2    7.60    1.50 
   5  -3  -2    6.50    1.40 
   5  -3  -2    7.70    1.60 
   5  -3  -2    6.90    1.50 
   5  -3  -2   11.20    1.90 
   5  -3  -2    8.30    1.40 
  -5   3   2    8.30    1.60 
  -5   3   2    7.70    1.40 
  -5   3   2    4.60    1.30 
   4  -3  -2   30.90    2.40 
   4  -3  -2   29.50    2.20 
   4  -3  -2   35.70    2.50 
   4  -3  -2   26.90    2.60 
  -4   3   2   28.80    2.30 
  -4   3   2   35.00    2.50 
  -4   3   2   31.40    2.30 
   3  -3  -2  565.94   16.00 
   3  -3  -2  528.85   16.10 
   3  -3  -2  571.84   16.40 
   3  -3  -2  572.04   15.90 
  -3   3   2  521.55   15.70 
  -3   3   2  598.24   16.50 
  -3   3   2  567.64   16.20 
   2  -3  -2  643.24   18.20 
   2  -3  -2  652.63   17.80 
   2  -3  -2  631.54   17.90 
   2  -3  -2  642.64   18.40 
  -2   3   2  665.13   18.50 
  -2   3   2  637.14   17.80 
  -2   3   2  666.33   18.30 
   1  -3  -2    5.60    1.20 
   1  -3  -2    5.30    1.20 
   1  -3  -2    4.50    0.90 
   1  -3  -2    2.40    0.90 
  -1   3   2    3.00    1.00 
  -1   3   2    3.70    0.90 
  -1   3   2    3.90    1.10 
   0  -3  -2   39.70    2.40 
   0  -3  -2   42.70    2.40 
   0  -3  -2   41.70    2.30 
   0   3   2   42.90    2.40 
   0   3   2   38.80    2.20 
   0   3   2   42.50    2.10 
  -1  -3  -2   37.30    2.10 
  -1  -3  -2   36.40    2.10 
  -1  -3  -2   37.90    2.00 
   1   3   2   38.30    1.90 
   1   3   2   37.20    2.10 
   1   3   2   40.00    2.10 
  -2  -3  -2    5.70    0.90 
  -2  -3  -2    6.00    1.00 
  -2  -3  -2    6.30    1.00 
   2   3   2    6.30    0.70 
   2   3   2    6.40    1.00 
  -3  -3  -2  186.18    5.90 
  -3  -3  -2  192.38    5.60 
  -3  -3  -2  188.38    5.90 
   3   3   2  186.88    5.80 
  -4  -3  -2  183.18    5.30 
  -4  -3  -2  178.38    5.70 
  -4  -3  -2  189.48    5.30 
  -4  -3  -2  184.18    5.70 
   4   3   2  182.58    7.00 
   4   3   2  190.18    5.50 
  -5  -3  -2    4.50    0.80 
  -5  -3  -2    4.40    0.70 
  -5  -3  -2    4.00    0.50 
  -5  -3  -2    2.80    0.40 
   5   3   2    0.50    1.10 
   5   3   2    3.70    0.60 
  -6  -3  -2  110.49    3.80 
  -6  -3  -2  118.69    3.90 
   6   3   2  112.79    5.60 
   6   3   2  110.09    4.50 
  -7  -3  -2    1.40    0.50 
  -7  -3  -2    1.80    0.60 
   7   3   2    2.30    1.00 
   7   3   2   -0.10    1.20 
  -8  -3  -2    0.60    0.50 
   8   3   2    0.80    1.10 
   8   3   2    1.10    0.90 
  -9  -3  -2    0.50    0.50 
  -9  -3  -2    0.00    0.50 
  -9  -3  -2   -0.10    0.30 
  -9  -3  -2    0.40    0.30 
   9   3   2    0.20    0.90 
   9   3   2    2.30    1.50 
 -10  -3  -2   53.99    2.00 
 -10  -3  -2   50.69    2.50 
 -10  -3  -2   47.30    2.40 
  10   3   2   54.99    5.50 
  10   3   2   51.09    3.70 
 -11  -3  -2   75.49    3.30 
 -11  -3  -2   73.79    3.30 
  11   3   2   76.59    4.80 
  11   3   2   72.79    5.60 
 -12  -3  -2   36.70    2.30 
 -12  -3  -2   35.60    2.30 
  12   3   2   36.30    4.00 
  12   3   2   31.80    4.80 
 -13  -3  -2   16.40    1.80 
  13   3   2    1.20    1.80 
  13   3   2    7.70    2.20 
 -14  -3  -2    0.90    0.80 
  14   3   2    0.50    1.70 
  14   3   2    3.10    1.80 
 -15  -3  -2   13.60    1.80 
  15   3   2   12.40    2.90 
  15   3   2    2.00    2.50 
 -16  -3  -2    2.80    1.20 
  16   3   2    4.30    2.20 
  16   3   2    0.20    2.10 
 -17  -3  -2    0.40    1.00 
  17   3   2    0.30    1.90 
  17   3   2    0.60    2.40 
  17   3   2    0.80    2.40 
 -18  -3  -2   16.90    2.30 
  18   3   2   14.60    4.70 
 -19  -3  -2    1.40    1.30 
  19   3   2    1.10    3.20 
  19  -4  -2   15.00    4.50 
  19  -4  -2   15.10    4.10 
 -19   4   2    9.80    3.20 
 -19   4   2    6.50    3.10 
  18  -4  -2   -1.80    2.20 
  18  -4  -2   -0.80    1.70 
  18  -4  -2    1.40    2.70 
 -18   4   2   -1.00    1.80 
 -18   4   2   -0.40    1.70 
  17  -4  -2   13.50    4.00 
  17  -4  -2   17.20    3.20 
  17  -4  -2   14.50    4.00 
 -17   4   2   19.80    3.70 
 -17   4   2   17.00    3.60 
  16  -4  -2   31.20    5.50 
  16  -4  -2   31.20    5.50 
  16  -4  -2   27.10    3.90 
 -16   4   2   25.70    4.00 
 -16   4   2   20.20    3.70 
  15  -4  -2   24.30    4.60 
  15  -4  -2   23.00    3.60 
  15  -4  -2   22.60    4.60 
 -15   4   2   25.30    3.90 
 -15   4   2   18.50    3.50 
  14  -4  -2    1.60    2.10 
  14  -4  -2    0.50    1.50 
  14  -4  -2    5.10    2.60 
 -14   4   2    2.70    1.80 
 -14   4   2    2.10    1.80 
  13  -4  -2   35.90    4.30 
  13  -4  -2   31.80    4.90 
  13  -4  -2   38.70    5.10 
 -13   4   2   42.80    4.50 
 -13   4   2   32.40    4.30 
  12  -4  -2  367.36   14.50 
  12  -4  -2  336.07   12.80 
  12  -4  -2  362.26   15.00 
 -12   4   2  338.87   12.60 
 -12   4   2  325.97   13.10 
  11  -4  -2    1.30    1.40 
  11  -4  -2    1.50    1.50 
  11  -4  -2   -1.80    1.30 
 -11   4   2   -0.10    1.10 
 -11   4   2    0.60    1.50 
 -11   4   2    0.50    1.20 
  10  -4  -2   52.49    5.20 
  10  -4  -2   60.39    3.50 
  10  -4  -2   65.79    4.50 
  10  -4  -2   49.70    5.40 
 -10   4   2   57.39    4.30 
 -10   4   2   59.79    4.30 
 -10   4   2   52.39    3.90 
   9  -4  -2   41.80    3.00 
   9  -4  -2   35.90    4.20 
   9  -4  -2   47.20    4.50 
   9  -4  -2   41.50    4.50 
  -9   4   2   46.50    3.60 
  -9   4   2   45.60    3.70 
  -9   4   2   41.80    3.90 
   8  -4  -2   29.30    3.50 
   8  -4  -2   19.60    3.10 
   8  -4  -2   30.90    3.30 
   8  -4  -2   25.60    2.80 
   8  -4  -2   26.30    3.50 
  -8   4   2   24.20    3.20 
  -8   4   2   18.70    2.60 
  -8   4   2   20.80    2.80 
   7  -4  -2   91.09    5.20 
   7  -4  -2  101.39    5.20 
   7  -4  -2   96.59    5.20 
   7  -4  -2   95.69    5.50 
   7  -4  -2  100.29    4.70 
  -7   4   2   95.19    5.20 
  -7   4   2   97.09    4.90 
   6  -4  -2  149.99    6.10 
   6  -4  -2  144.09    6.60 
   6  -4  -2  163.68    6.70 
   6  -4  -2  150.08    6.90 
   6  -4  -2  156.18    6.80 
   6  -4  -2  150.88    6.70 
  -6   4   2  142.79    6.50 
  -6   4   2  152.18    6.30 
  -6   4   2  147.99    6.60 
   5  -4  -2   35.40    3.40 
   5  -4  -2   40.30    3.00 
   5  -4  -2   35.10    2.70 
   5  -4  -2   37.70    3.50 
  -5   4   2   34.20    3.30 
  -5   4   2   34.60    3.40 
  -5   4   2   41.40    2.90 
   4  -4  -2   69.09    3.70 
   4  -4  -2   65.99    3.80 
   4  -4  -2   70.89    3.70 
   4  -4  -2   66.19    3.90 
  -4   4   2   64.29    3.80 
  -4   4   2   66.69    3.70 
  -4   4   2   68.59    3.90 
   3  -4  -2   65.09    3.80 
   3  -4  -2   78.09    3.60 
   3  -4  -2   59.79    3.60 
   3  -4  -2   66.29    3.60 
  -3   4   2   69.39    3.60 
  -3   4   2   67.49    3.80 
  -3   4   2   74.89    3.90 
   2  -4  -2    1.60    0.90 
   2  -4  -2    2.70    1.00 
   2  -4  -2    2.70    1.20 
   2  -4  -2    1.30    0.90 
  -2   4   2    1.80    1.00 
  -2   4   2    3.60    1.20 
  -2   4   2    2.40    0.90 
   1  -4  -2    4.80    1.20 
   1  -4  -2    4.70    1.20 
   1  -4  -2    6.90    1.50 
   1  -4  -2    8.40    1.20 
  -1   4   2    6.80    1.50 
  -1   4   2    6.00    1.20 
  -1   4   2    8.00    1.40 
   0  -4  -2  266.47    9.00 
   0  -4  -2  277.67    8.80 
   0  -4  -2  277.07    8.10 
   0   4   2  278.07    8.50 
   0   4   2  272.37    8.90 
   0   4   2  280.27    8.90 
  -1  -4  -2  408.06   12.10 
  -1  -4  -2  401.06   12.00 
  -1  -4  -2  401.86   12.10 
  -1  -4  -2  404.06   11.70 
   1   4   2  410.56   12.00 
   1   4   2  383.26   11.30 
  -2  -4  -2   20.20    1.90 
  -2  -4  -2   20.70    1.70 
  -2  -4  -2   20.60    1.70 
  -2  -4  -2   21.00    2.10 
   2   4   2   21.20    1.30 
   2   4   2   23.10    1.80 
  -3  -4  -2    1.20    0.70 
  -3  -4  -2    3.00    0.80 
  -3  -4  -2    1.90    0.80 
   3   4   2    1.20    0.70 
  -4  -4  -2  159.18    5.50 
  -4  -4  -2  164.78    5.60 
  -4  -4  -2  163.28    5.10 
   4   4   2  168.68    5.30 
  -5  -4  -2  124.39    3.90 
  -5  -4  -2  120.39    4.30 
  -5  -4  -2  118.09    3.90 
  -5  -4  -2  119.49    4.30 
   5   4   2  123.89    5.80 
   5   4   2  124.69    4.00 
  -6  -4  -2   39.60    1.60 
  -6  -4  -2   41.40    2.10 
  -6  -4  -2   35.60    1.60 
  -6  -4  -2   37.90    2.00 
   6   4   2   43.60    3.30 
   6   4   2   39.10    1.40 
   6   4   2   40.80    1.50 
  -7  -4  -2   43.30    1.50 
  -7  -4  -2   41.00    2.10 
  -7  -4  -2   41.40    2.10 
  -7  -4  -2   41.50    1.50 
   7   4   2   45.00    3.60 
  -8  -4  -2   25.00    1.60 
  -8  -4  -2   24.90    1.60 
   8   4   2   23.90    2.50 
   8   4   2   31.20    3.80 
  -9  -4  -2   25.10    1.60 
   9   4   2   30.50    3.00 
   9   4   2   30.10    4.00 
 -10  -4  -2   46.00    2.30 
  10   4   2   44.80    3.30 
  10   4   2   52.99    5.60 
 -11  -4  -2    0.60    0.60 
 -11  -4  -2    1.30    0.70 
  11   4   2    3.10    2.00 
  11   4   2    1.40    1.20 
 -12  -4  -2    2.90    0.90 
 -12  -4  -2    2.70    0.90 
  12   4   2    0.80    1.70 
  12   4   2    5.00    1.80 
 -13  -4  -2   15.70    1.60 
 -13  -4  -2   11.10    1.50 
  13   4   2   10.50    2.40 
  13   4   2   10.50    3.40 
 -14  -4  -2   -0.20    0.70 
  14   4   2    0.80    2.00 
  14   4   2    0.60    1.50 
 -15  -4  -2    1.20    0.90 
  15   4   2    2.80    2.60 
 -16  -4  -2   11.20    1.60 
  16   4   2   15.70    4.20 
 -17  -4  -2    9.70    1.60 
  17   4   2   10.40    3.80 
 -18  -4  -2   58.19    3.20 
  18   4   2   57.89    8.30 
 -19  -4  -2   16.10    1.80 
  19   4   2   14.90    4.50 
  18  -5  -2   13.90    4.50 
  18  -5  -2    8.20    2.80 
  18  -5  -2    3.70    2.80 
 -18   5   2    2.90    2.40 
 -18   5   2    8.10    2.80 
  17  -5  -2    4.20    2.80 
  17  -5  -2    7.00    2.70 
  17  -5  -2   10.00    3.50 
 -17   5   2    9.80    3.20 
 -17   5   2    7.20    2.90 
  16  -5  -2   12.50    4.00 
  16  -5  -2   13.80    3.20 
  16  -5  -2   12.80    3.60 
 -16   5   2   12.00    3.20 
 -16   5   2   10.40    2.90 
  15  -5  -2    5.10    2.30 
  15  -5  -2    7.50    3.30 
  15  -5  -2    7.20    2.90 
 -15   5   2    5.50    2.30 
 -15   5   2    6.80    2.50 
  14  -5  -2   -0.10    1.90 
  14  -5  -2   -1.40    1.40 
  14  -5  -2    2.50    2.20 
 -14   5   2    1.20    1.60 
 -14   5   2    1.10    1.70 
  13  -5  -2    2.60    2.00 
  13  -5  -2    2.50    2.00 
  13  -5  -2   -0.20    1.40 
 -13   5   2    1.00    1.60 
 -13   5   2   -0.40    1.40 
  12  -5  -2   64.89    6.80 
  12  -5  -2   63.39    5.00 
  12  -5  -2   52.89    5.90 
 -12   5   2   59.39    5.80 
 -12   5   2   59.59    4.70 
  11  -5  -2   43.80    4.80 
  11  -5  -2   54.49    5.80 
  11  -5  -2   63.89    6.60 
 -11   5   2   53.89    4.30 
 -11   5   2   64.89    6.00 
 -11   5   2   50.09    5.10 
  10  -5  -2   33.50    4.20 
  10  -5  -2   48.40    5.30 
  10  -5  -2   37.90    3.70 
  10  -5  -2   42.30    4.80 
 -10   5   2   47.70    4.90 
 -10   5   2   39.10    4.20 
 -10   5   2   40.20    4.50 
   9  -5  -2    0.60    1.40 
   9  -5  -2    2.50    1.60 
   9  -5  -2    0.70    1.50 
   9  -5  -2    3.70    1.50 
  -9   5   2    5.30    1.90 
  -9   5   2    1.70    1.40 
  -9   5   2    0.40    1.10 
   8  -5  -2    5.20    1.60 
   8  -5  -2    8.30    2.10 
   8  -5  -2    9.60    2.40 
   8  -5  -2    6.90    2.00 
   8  -5  -2    8.10    2.10 
  -8   5   2    9.60    2.20 
  -8   5   2    6.90    2.00 
  -8   5   2    8.50    2.00 
   7  -5  -2   69.29    4.40 
   7  -5  -2   72.29    4.60 
   7  -5  -2   63.39    4.50 
   7  -5  -2   73.09    4.30 
   7  -5  -2   68.89    4.60 
  -7   5   2   61.19    4.30 
  -7   5   2   67.99    4.20 
  -7   5   2   60.69    4.40 
   6  -5  -2   96.29    5.40 
   6  -5  -2   98.79    4.90 
   6  -5  -2   96.49    5.20 
   6  -5  -2   89.09    5.20 
   6  -5  -2  104.49    5.40 
  -6   5   2   88.79    5.20 
  -6   5   2   91.79    4.90 
   5  -5  -2    1.30    1.30 
   5  -5  -2    1.00    1.20 
   5  -5  -2    3.90    1.40 
   5  -5  -2    3.30    1.30 
   5  -5  -2    1.50    1.20 
  -5   5   2    3.00    1.30 
  -5   5   2    3.70    1.30 
  -5   5   2    2.50    1.20 
   4  -5  -2   95.89    5.20 
   4  -5  -2   93.89    4.90 
   4  -5  -2   92.89    4.60 
   4  -5  -2   95.89    4.80 
  -4   5   2   96.39    5.10 
  -4   5   2   94.79    4.70 
  -4   5   2   89.39    4.90 
   3  -5  -2  241.98    8.70 
   3  -5  -2  237.98    8.90 
   3  -5  -2  246.88    8.40 
   3  -5  -2  240.48    9.00 
  -3   5   2  230.38    8.90 
  -3   5   2  243.08    9.00 
  -3   5   2  242.98    8.60 
   2  -5  -2   -0.30    0.90 
   2  -5  -2   -0.80    0.80 
   2  -5  -2   -0.10    0.70 
   2  -5  -2   -1.00    0.70 
  -2   5   2    1.20    0.90 
  -2   5   2   -0.80    0.80 
  -2   5   2   -0.10    0.80 
   1  -5  -2    2.90    1.20 
   1  -5  -2    2.50    1.20 
   1  -5  -2    2.20    1.20 
   1  -5  -2    2.60    0.90 
  -1   5   2    2.90    1.20 
  -1   5   2    3.10    1.20 
  -1   5   2    0.90    0.80 
   0  -5  -2   98.69    3.70 
   0  -5  -2   94.99    4.60 
   0  -5  -2   99.39    4.60 
   0  -5  -2   96.79    4.40 
   0   5   2  100.89    4.60 
   0   5   2   95.39    4.10 
   0   5   2  100.49    4.60 
  -1  -5  -2   10.40    1.10 
  -1  -5  -2    8.30    1.50 
  -1  -5  -2    9.00    1.60 
  -1  -5  -2   12.60    1.90 
  -1  -5  -2    9.70    1.60 
   1   5   2    8.30    1.30 
   1   5   2    8.60    1.60 
   1   5   2    9.60    1.60 
  -2  -5  -2   61.49    3.40 
  -2  -5  -2   60.29    3.10 
  -2  -5  -2   63.69    3.30 
  -2  -5  -2   66.49    3.40 
   2   5   2   63.49    2.70 
   2   5   2   58.49    3.20 
  -3  -5  -2   36.40    2.40 
  -3  -5  -2   35.10    2.40 
  -3  -5  -2   37.90    2.40 
  -3  -5  -2   31.00    2.20 
   3   5   2   36.90    1.40 
   3   5   2   36.60    2.40 
  -4  -5  -2  184.88    6.20 
  -4  -5  -2  179.18    6.50 
  -4  -5  -2  198.88    6.70 
   4   5   2  195.18    6.40 
  -5  -5  -2   93.99    3.90 
  -5  -5  -2   92.59    3.90 
  -5  -5  -2   95.69    3.60 
   5   5   2   90.19    3.50 
  -6  -5  -2   58.19    2.90 
  -6  -5  -2   60.39    2.90 
  -6  -5  -2   59.59    2.60 
   6   5   2   61.09    2.40 
  -7  -5  -2    7.00    1.00 
  -7  -5  -2    6.40    1.10 
  -7  -5  -2    6.80    1.10 
  -8  -5  -2    0.10    0.50 
  -8  -5  -2    0.80    0.60 
  -8  -5  -2    0.10    0.50 
   8   5   2   -0.60    1.20 
  -9  -5  -2   13.90    1.00 
  -9  -5  -2    9.80    1.30 
  -9  -5  -2   15.30    1.50 
   9   5   2   14.50    2.90 
 -10  -5  -2  230.98    7.10 
 -10  -5  -2  219.58    7.10 
  10   5   2  230.58   10.70 
 -11  -5  -2   25.00    1.70 
  11   5   2   21.40    3.80 
 -12  -5  -2    4.40    1.00 
 -12  -5  -2    4.60    0.90 
  12   5   2    8.80    2.90 
 -13  -5  -2  119.49    4.40 
 -13  -5  -2  123.29    4.40 
  13   5   2  120.19    8.20 
 -14  -5  -2    2.30    0.80 
  14   5   2    2.80    2.60 
 -15  -5  -2   52.79    2.50 
  15   5   2   40.20    6.20 
 -16  -5  -2   30.30    1.80 
  16   5   2   19.30    4.60 
 -17  -5  -2    2.40    0.80 
  17   5   2   -0.10    2.60 
  18   5   2    7.50    3.40 
  18  -6  -2    3.70    3.10 
  18  -6  -2   -0.20    2.60 
  18  -6  -2   -0.70    1.90 
 -18   6   2    0.10    2.20 
 -18   6   2    5.00    2.70 
  17  -6  -2    4.30    2.50 
  17  -6  -2   -1.10    1.80 
  17  -6  -2    5.10    3.30 
 -17   6   2    6.40    2.80 
 -17   6   2    4.30    2.90 
  16  -6  -2    6.60    3.60 
  16  -6  -2    4.90    2.40 
  16  -6  -2    4.20    2.90 
 -16   6   2    2.50    2.20 
 -16   6   2    5.10    2.40 
  15  -6  -2    1.60    1.90 
  15  -6  -2    3.70    2.50 
  15  -6  -2    2.00    2.30 
 -15   6   2    6.80    2.60 
 -15   6   2    1.20    2.00 
  14  -6  -2  162.58   10.20 
  14  -6  -2  142.79    9.30 
  14  -6  -2  158.98    9.00 
 -14   6   2  156.48    8.60 
 -14   6   2  172.68    9.50 
  13  -6  -2   27.20    4.60 
  13  -6  -2   31.10    4.90 
  13  -6  -2   23.50    3.90 
 -13   6   2   24.00    3.70 
 -13   6   2   28.80    4.50 
  12  -6  -2   12.60    3.30 
  12  -6  -2   18.70    3.60 
  12  -6  -2   12.20    3.20 
 -12   6   2   10.30    2.60 
 -12   6   2   19.70    3.60 
  11  -6  -2   18.00    3.80 
  11  -6  -2   15.90    3.40 
  11  -6  -2   16.20    3.40 
 -11   6   2   20.10    3.30 
 -11   6   2   22.10    3.80 
 -11   6   2   16.70    3.30 
  10  -6  -2   65.79    5.50 
  10  -6  -2   74.89    4.70 
  10  -6  -2   66.89    5.30 
  10  -6  -2   72.49    5.50 
 -10   6   2   73.79    5.40 
 -10   6   2   68.39    5.00 
 -10   6   2   64.99    5.20 
   9  -6  -2   21.80    3.00 
   9  -6  -2   18.40    3.20 
   9  -6  -2   19.60    3.60 
   9  -6  -2   18.00    3.30 
  -9   6   2   24.70    3.70 
  -9   6   2   14.90    2.80 
  -9   6   2   19.70    3.20 
   8  -6  -2    2.00    1.60 
   8  -6  -2    4.30    1.60 
   8  -6  -2    5.40    2.10 
   8  -6  -2    4.70    2.00 
  -8   6   2    3.40    1.70 
  -8   6   2    4.00    1.80 
  -8   6   2    3.60    1.60 
   7  -6  -2   24.80    3.50 
   7  -6  -2   26.00    3.50 
   7  -6  -2   22.20    3.20 
   7  -6  -2   24.60    3.20 
  -7   6   2   22.90    3.30 
  -7   6   2   26.60    3.50 
  -7   6   2   25.60    3.20 
   6  -6  -2    5.90    1.80 
   6  -6  -2    6.90    1.90 
   6  -6  -2    7.30    2.20 
   6  -6  -2    8.60    2.10 
   6  -6  -2    6.30    2.00 
  -6   6   2    8.60    1.90 
  -6   6   2    8.80    2.10 
  -6   6   2   10.10    2.40 
   5  -6  -2   41.00    4.00 
   5  -6  -2   34.00    3.60 
   5  -6  -2   37.60    4.10 
   5  -6  -2   33.20    3.40 
   5  -6  -2   35.30    4.00 
  -5   6   2   33.70    3.70 
  -5   6   2   29.70    3.60 
  -5   6   2   38.10    3.80 
   4  -6  -2   -0.60    0.80 
   4  -6  -2   -0.50    0.90 
   4  -6  -2   -0.20    0.80 
   4  -6  -2    0.80    1.10 
   4  -6  -2   -0.10    1.00 
  -4   6   2    2.60    1.20 
  -4   6   2    0.10    1.00 
  -4   6   2    0.00    0.80 
   3  -6  -2   11.40    1.80 
   3  -6  -2   16.50    2.60 
   3  -6  -2   12.80    2.20 
   3  -6  -2   13.50    2.30 
  -3   6   2    9.10    1.80 
  -3   6   2    7.60    1.80 
  -3   6   2    8.10    1.90 
   2  -6  -2   39.00    3.60 
   2  -6  -2   35.90    3.50 
   2  -6  -2   35.00    2.50 
   2  -6  -2   35.20    3.60 
  -2   6   2   38.70    2.90 
  -2   6   2   45.70    3.40 
   1  -6  -2  152.78    6.70 
   1  -6  -2  149.88    6.70 
   1  -6  -2  154.58    6.50 
   1  -6  -2  162.18    5.80 
  -1   6   2  164.78    6.90 
  -1   6   2  155.58    6.20 
  -1   6   2  163.68    6.80 
   0  -6  -2    6.20    1.50 
   0  -6  -2    4.70    1.00 
   0  -6  -2    2.40    1.20 
   0  -6  -2    1.60    1.30 
   0   6   2    1.60    1.00 
   0   6   2    4.70    1.30 
   0   6   2    4.40    1.40 
  -1  -6  -2    4.40    1.40 
  -1  -6  -2    1.90    1.30 
  -1  -6  -2    4.80    1.40 
  -1  -6  -2    1.90    1.10 
  -1  -6  -2    3.90    0.80 
   1   6   2    3.60    1.00 
   1   6   2    2.30    1.10 
   1   6   2    1.70    1.00 
  -2  -6  -2  154.58    6.20 
  -2  -6  -2  155.08    6.40 
  -2  -6  -2  161.48    4.80 
  -2  -6  -2  162.88    6.50 
  -2  -6  -2  157.58    6.40 
   2   6   2  153.08    6.20 
   2   6   2  160.18    5.50 
  -3  -6  -2    0.30    0.80 
  -3  -6  -2    0.20    0.90 
  -3  -6  -2    0.30    0.80 
  -3  -6  -2   -0.80    0.70 
   3   6   2    0.70    0.80 
   3   6   2    0.30    0.40 
  -4  -6  -2    2.00    0.90 
  -4  -6  -2    1.90    0.90 
  -4  -6  -2    1.00    0.80 
  -4  -6  -2    1.50    1.00 
   4   6   2    2.70    0.90 
  -5  -6  -2   61.99    3.30 
  -5  -6  -2   61.29    3.10 
  -5  -6  -2   57.89    3.20 
   5   6   2   54.69    2.90 
  -6  -6  -2    6.20    1.20 
  -6  -6  -2    4.00    1.10 
  -6  -6  -2    7.70    1.30 
   6   6   2    6.80    1.10 
  -7  -6  -2   55.09    3.00 
  -7  -6  -2   50.79    2.90 
  -7  -6  -2   59.69    2.80 
   7   6   2   60.99    2.10 
  -8  -6  -2   25.80    2.30 
  -8  -6  -2   22.80    1.70 
  -8  -6  -2   21.50    2.00 
  -9  -6  -2   25.20    1.90 
  -9  -6  -2   27.40    2.00 
  -9  -6  -2   26.20    1.80 
 -10  -6  -2    1.00    0.70 
 -10  -6  -2   -1.00    0.60 
 -11  -6  -2    0.00    0.60 
 -11  -6  -2    0.30    0.70 
  11   6   2    0.70    1.80 
 -12  -6  -2    3.30    0.90 
  12   6   2    3.30    2.40 
 -13  -6  -2    6.30    1.10 
  13   6   2    5.60    2.60 
 -14  -6  -2    8.70    1.10 
  14   6   2    2.80    2.70 
  15   6   2    2.30    2.70 
  16   6   2   46.40    7.00 
  17   6   2   -2.90    2.20 
  18   6   2   13.20    4.50 
  17  -7  -2    2.20    2.90 
  17  -7  -2    7.60    4.00 
  17  -7  -2    5.10    2.90 
 -17   7   2   10.20    3.30 
 -17   7   2    6.80    3.20 
  16  -7  -2    1.00    2.60 
  16  -7  -2   -0.70    1.80 
  16  -7  -2   -0.20    2.40 
 -16   7   2   -0.40    1.90 
 -16   7   2    2.50    2.30 
  15  -7  -2    8.30    3.00 
  15  -7  -2   10.90    3.40 
  15  -7  -2    1.20    2.10 
 -15   7   2    7.50    2.60 
 -15   7   2    8.60    3.10 
  14  -7  -2   -2.40    1.60 
  14  -7  -2   -1.80    1.70 
  14  -7  -2    0.80    2.00 
 -14   7   2    2.10    2.10 
 -14   7   2    1.80    1.90 
  13  -7  -2   33.80    5.10 
  13  -7  -2   22.70    4.40 
  13  -7  -2   20.40    4.20 
 -13   7   2   27.50    4.60 
 -13   7   2   32.50    4.80 
  12  -7  -2    8.50    2.80 
  12  -7  -2    8.90    2.80 
  12  -7  -2    9.60    3.20 
 -12   7   2   14.90    3.50 
 -12   7   2    8.80    2.70 
 -12   7   2   14.30    3.30 
  11  -7  -2   21.70    4.00 
  11  -7  -2   26.10    4.40 
  11  -7  -2   27.00    3.70 
  11  -7  -2   13.10    3.30 
 -11   7   2   23.20    3.70 
 -11   7   2   21.40    4.00 
 -11   7   2   28.00    4.50 
  10  -7  -2   46.10    4.80 
  10  -7  -2   38.30    5.00 
  10  -7  -2   37.20    5.00 
  10  -7  -2   33.90    4.60 
 -10   7   2   40.60    4.60 
 -10   7   2   34.90    4.70 
 -10   7   2   33.30    4.60 
   9  -7  -2   25.90    4.10 
   9  -7  -2   27.50    3.70 
   9  -7  -2   25.70    3.90 
   9  -7  -2   22.20    3.80 
  -9   7   2   23.50    3.90 
  -9   7   2   24.90    3.60 
  -9   7   2   28.70    4.30 
   8  -7  -2    2.00    1.80 
   8  -7  -2    0.10    1.40 
   8  -7  -2    4.60    2.20 
  -8   7   2    5.70    2.20 
  -8   7   2    4.20    1.80 
  -8   7   2    2.70    1.70 
   7  -7  -2   16.10    2.80 
   7  -7  -2   21.70    3.40 
   7  -7  -2   17.10    3.10 
   7  -7  -2   18.20    3.30 
  -7   7   2   19.80    3.40 
  -7   7   2   13.50    2.50 
  -7   7   2   22.30    3.70 
   6  -7  -2   24.00    3.50 
   6  -7  -2   29.70    3.60 
   6  -7  -2   23.00    3.50 
   6  -7  -2   31.70    3.80 
   6  -7  -2   27.90    3.70 
  -6   7   2   25.70    3.50 
  -6   7   2   22.40    3.10 
  -6   7   2   25.00    3.60 
   5  -7  -2    2.00    1.20 
   5  -7  -2    0.60    1.10 
   5  -7  -2    1.20    1.40 
   5  -7  -2    4.70    2.00 
   5  -7  -2    1.60    1.50 
  -5   7   2   -0.60    1.00 
  -5   7   2    1.10    1.30 
  -5   7   2    4.90    1.70 
   4  -7  -2   52.79    4.20 
   4  -7  -2   47.20    3.90 
   4  -7  -2   49.90    3.60 
   4  -7  -2   56.79    4.40 
   4  -7  -2   49.60    3.90 
  -4   7   2   54.79    4.20 
  -4   7   2   48.70    3.60 
  -4   7   2   42.40    4.50 
   3  -7  -2   16.30    2.80 
   3  -7  -2   19.50    3.20 
   3  -7  -2   16.00    2.30 
   3  -7  -2   15.60    2.60 
   3  -7  -2   14.80    2.70 
  -3   7   2   16.90    2.60 
  -3   7   2   11.20    2.40 
  -3   7   2   11.80    2.40 
   2  -7  -2   -0.70    1.10 
   2  -7  -2    0.50    0.80 
   2  -7  -2   -0.10    0.90 
   2  -7  -2   -0.20    1.00 
  -2   7   2    0.40    1.00 
  -2   7   2   -1.10    0.80 
  -2   7   2   -0.20    0.80 
   1  -7  -2  105.49    5.50 
   1  -7  -2  111.09    4.60 
   1  -7  -2  104.59    5.60 
   1  -7  -2  101.69    5.70 
  -1   7   2  103.19    5.50 
  -1   7   2  111.29    5.70 
  -1   7   2  117.49    5.30 
   0  -7  -2   89.69    3.70 
   0  -7  -2   83.39    4.70 
   0  -7  -2   81.49    4.90 
   0  -7  -2   91.49    5.00 
   0   7   2   80.59    4.70 
   0   7   2   85.49    4.30 
   0   7   2   86.99    4.80 
  -1  -7  -2   58.29    3.70 
  -1  -7  -2   48.00    3.60 
  -1  -7  -2   44.40    3.30 
  -1  -7  -2   47.70    2.30 
   1   7   2   55.19    3.60 
   1   7   2   48.60    2.90 
   1   7   2   53.69    3.60 
  -2  -7  -2   37.00    1.70 
  -2  -7  -2   41.50    3.20 
  -2  -7  -2   37.50    3.00 
  -2  -7  -2   33.80    3.20 
  -2  -7  -2   39.10    3.10 
   2   7   2   37.50    2.90 
   2   7   2   35.70    2.30 
  -3  -7  -2    8.20    1.70 
  -3  -7  -2   14.70    2.10 
  -3  -7  -2   14.20    2.30 
  -3  -7  -2   12.30    2.10 
   3   7   2   16.90    1.50 
   3   7   2   14.70    2.10 
  -4  -7  -2    1.10    1.10 
  -4  -7  -2    0.20    0.80 
  -4  -7  -2    0.10    0.80 
  -4  -7  -2   -0.80    0.70 
   4   7   2    0.30    0.80 
  -5  -7  -2   63.19    3.70 
  -5  -7  -2   71.59    3.70 
  -5  -7  -2   63.39    3.70 
   5   7   2   62.29    3.40 
  -6  -7  -2   29.80    2.80 
  -6  -7  -2   31.10    2.50 
  -6  -7  -2   29.90    2.70 
   6   7   2   31.90    2.20 
  -7  -7  -2    8.50    1.60 
  -7  -7  -2   10.50    1.60 
  -7  -7  -2    7.90    1.50 
   7   7   2    8.20    1.10 
  -8  -7  -2   -1.00    0.70 
  -8  -7  -2    0.40    0.80 
  -8  -7  -2   -0.90    0.60 
  -9  -7  -2    4.60    1.10 
 -10  -7  -2    1.50    0.90 
 -11  -7  -2    5.10    1.10 
 -12  -7  -2   10.30    1.40 
 -13  -7  -2  145.19    5.10 
 -14  -7  -2    4.70    0.90 
  16  -8  -2    6.70    3.10 
  16  -8  -2   11.00    3.90 
  16  -8  -2    6.80    3.20 
 -16   8   2    8.30    3.70 
 -16   8   2    4.80    2.90 
  15  -8  -2    1.30    2.30 
  15  -8  -2    0.40    2.30 
  15  -8  -2    1.10    2.50 
 -15   8   2    5.20    2.50 
 -15   8   2   -0.40    2.10 
  14  -8  -2   19.10    4.60 
  14  -8  -2   10.40    3.40 
  14  -8  -2   12.80    3.80 
 -14   8   2   14.90    3.50 
 -14   8   2   10.70    3.30 
  13  -8  -2    0.10    1.90 
  13  -8  -2   -0.60    2.00 
  13  -8  -2    0.30    1.90 
 -13   8   2    2.00    2.10 
 -13   8   2   -0.50    1.70 
  12  -8  -2   27.70    4.70 
  12  -8  -2   34.80    5.40 
  12  -8  -2   36.30    5.60 
 -12   8   2   26.50    4.30 
 -12   8   2   34.90    5.40 
 -12   8   2   29.10    4.70 
  11  -8  -2   12.20    3.50 
  11  -8  -2    4.70    2.70 
  11  -8  -2    8.50    2.90 
  11  -8  -2    5.00    2.00 
 -11   8   2    9.80    3.20 
 -11   8   2    7.00    2.40 
 -11   8   2    8.90    3.00 
  10  -8  -2   11.90    3.00 
  10  -8  -2    8.80    2.80 
  10  -8  -2   11.40    2.80 
  10  -8  -2   12.40    3.50 
 -10   8   2    8.10    2.60 
 -10   8   2    6.40    2.40 
 -10   8   2   11.80    2.80 
   9  -8  -2   -1.40    1.60 
   9  -8  -2    1.10    1.80 
   9  -8  -2    0.10    1.70 
   9  -8  -2   -0.80    1.20 
  -9   8   2    1.60    2.00 
  -9   8   2   -0.90    1.30 
  -9   8   2   -0.20    1.60 
   8  -8  -2   -0.10    1.10 
   8  -8  -2   -1.90    1.40 
   8  -8  -2    1.10    1.30 
  -8   8   2   -1.60    1.20 
  -8   8   2    1.20    1.50 
  -8   8   2   -2.20    1.20 
   7  -8  -2  114.09    6.60 
   7  -8  -2  115.89    7.30 
   7  -8  -2  122.99    6.70 
  -7   8   2  117.39    7.10 
  -7   8   2  118.49    6.70 
  -7   8   2  105.09    6.90 
   6  -8  -2   18.10    3.40 
   6  -8  -2   14.20    3.00 
   6  -8  -2   17.80    2.90 
   6  -8  -2   13.60    2.70 
  -6   8   2   11.90    2.70 
  -6   8   2   16.00    3.20 
  -6   8   2   11.40    2.40 
   5  -8  -2  112.19    6.50 
   5  -8  -2  107.59    6.70 
   5  -8  -2  125.59    6.90 
   5  -8  -2  120.69    6.10 
  -5   8   2  110.09    6.70 
  -5   8   2   99.09    6.40 
  -5   8   2  113.99    6.20 
   4  -8  -2   20.00    3.30 
   4  -8  -2   29.50    3.80 
   4  -8  -2   15.90    3.00 
   4  -8  -2   20.30    3.40 
   4  -8  -2   21.50    2.80 
  -4   8   2   20.60    3.10 
  -4   8   2   17.80    3.00 
  -4   8   2   12.70    2.70 
   3  -8  -2  133.09    7.20 
   3  -8  -2  142.99    6.30 
   3  -8  -2  142.89    7.50 
   3  -8  -2  138.29    7.00 
  -3   8   2  154.28    7.60 
  -3   8   2  140.89    6.70 
  -3   8   2  151.78    7.50 
   2  -8  -2    6.50    2.00 
   2  -8  -2    4.40    1.90 
   2  -8  -2    4.10    1.40 
   2  -8  -2   10.10    2.50 
   2  -8  -2    3.60    1.50 
  -2   8   2    3.80    1.60 
  -2   8   2    5.20    1.90 
  -2   8   2    4.30    1.60 
   1  -8  -2   14.00    2.80 
   1  -8  -2   10.50    2.40 
   1  -8  -2    9.80    2.20 
   1  -8  -2   12.30    1.80 
  -1   8   2    6.40    2.00 
  -1   8   2   11.10    2.10 
   0  -8  -2   90.59    5.60 
   0  -8  -2   89.59    3.90 
   0  -8  -2   84.89    5.20 
   0  -8  -2   92.49    5.30 
   0   8   2   95.99    4.80 
   0   8   2   88.49    5.20 
  -1  -8  -2    2.50    1.40 
  -1  -8  -2    3.00    1.30 
  -1  -8  -2    1.10    1.20 
   1   8   2    2.50    1.20 
   1   8   2    3.60    1.60 
  -2  -8  -2    2.80    1.60 
  -2  -8  -2    3.50    1.40 
  -2  -8  -2    1.00    1.10 
   2   8   2    2.10    1.20 
   2   8   2    1.60    0.90 
  -3  -8  -2   59.39    4.20 
  -3  -8  -2   60.89    4.00 
  -3  -8  -2   64.99    4.00 
   3   8   2   58.39    3.90 
  -4  -8  -2   23.10    2.80 
  -4  -8  -2   26.10    3.00 
   4   8   2   22.80    2.70 
  -5  -8  -2   82.49    4.40 
  -5  -8  -2   71.19    4.30 
   5   8   2   77.29    4.00 
  -6  -8  -2    8.80    1.70 
  -6  -8  -2    7.10    1.60 
   6   8   2    5.70    1.40 
  -7  -8  -2  102.59    4.90 
  -7  -8  -2  106.79    5.10 
   7   8   2  103.99    4.10 
  -8  -8  -2    7.40    1.70 
  -8  -8  -2    6.80    1.50 
  -9  -8  -2   16.90    2.20 
 -10  -8  -2    9.70    1.70 
 -11  -8  -2    4.60    1.20 
 -12  -8  -2    3.30    1.10 
 -13  -8  -2    3.60    1.00 
 -14  -8  -2    4.40    1.00 
  16  -9  -2    4.70    3.30 
  16  -9  -2    4.80    3.10 
  16  -9  -2    5.70    3.70 
 -16   9   2    2.30    2.90 
 -16   9   2    5.60    3.10 
  15  -9  -2    4.10    2.90 
  15  -9  -2   13.10    4.10 
  15  -9  -2    6.10    3.40 
 -15   9   2   14.60    4.00 
 -15   9   2   12.00    3.90 
  14  -9  -2   12.30    3.70 
  14  -9  -2   19.10    4.50 
  14  -9  -2   11.90    3.70 
 -14   9   2   28.90    5.30 
 -14   9   2   22.00    4.40 
  13  -9  -2   58.29    7.30 
  13  -9  -2   58.19    7.00 
  13  -9  -2   51.89    6.80 
 -13   9   2   39.80    5.40 
 -13   9   2   49.99    6.70 
  12  -9  -2   58.59    7.40 
  12  -9  -2   62.29    7.10 
  12  -9  -2   70.39    7.80 
 -12   9   2   77.09    8.20 
 -12   9   2   69.09    7.10 
 -12   9   2   75.99    7.80 
  11  -9  -2    0.00    2.30 
  11  -9  -2   -1.50    2.00 
  11  -9  -2    0.00    1.70 
  11  -9  -2    1.10    2.00 
 -11   9   2   -0.80    2.10 
 -11   9   2    1.10    2.20 
 -11   9   2    1.60    1.60 
  10  -9  -2    2.10    2.00 
  10  -9  -2    5.30    2.30 
  10  -9  -2    0.80    2.00 
  10  -9  -2   -1.50    2.00 
 -10   9   2    1.60    2.10 
 -10   9   2    2.60    2.10 
 -10   9   2    5.40    2.40 
   9  -9  -2   17.30    3.90 
   9  -9  -2   25.70    4.30 
   9  -9  -2   16.80    3.30 
  -9   9   2   22.70    3.80 
  -9   9   2   28.20    4.60 
  -9   9   2   15.10    3.70 
   8  -9  -2    5.80    2.90 
   8  -9  -2    9.10    2.60 
   8  -9  -2    3.40    2.10 
  -8   9   2    4.90    2.20 
  -8   9   2    6.10    2.30 
  -8   9   2    3.40    2.10 
   7  -9  -2   47.10    5.80 
   7  -9  -2   33.20    4.60 
   7  -9  -2   42.20    4.90 
  -7   9   2   36.90    5.00 
  -7   9   2   35.10    4.60 
  -7   9   2   44.70    5.50 
   6  -9  -2   45.00    4.70 
   6  -9  -2   41.80    4.90 
   6  -9  -2   51.89    5.80 
   6  -9  -2   44.30    5.50 
  -6   9   2   34.90    4.50 
  -6   9   2   55.09    5.90 
   5  -9  -2   11.60    2.40 
   5  -9  -2    8.50    2.70 
   5  -9  -2    9.60    2.60 
   5  -9  -2    8.80    2.40 
  -5   9   2    8.20    2.70 
  -5   9   2   11.10    2.60 
   4  -9  -2   50.59    5.10 
   4  -9  -2   38.30    4.80 
   4  -9  -2   45.50    4.20 
   4  -9  -2   45.50    5.30 
   4  -9  -2   46.80    5.10 
  -4   9   2   48.20    5.30 
  -4   9   2   42.40    4.60 
   3  -9  -2  118.19    6.90 
   3  -9  -2  115.09    6.60 
   3  -9  -2  113.29    7.00 
   3  -9  -2  114.89    5.60 
   3  -9  -2  118.09    7.10 
  -3   9   2  104.19    6.50 
  -3   9   2   95.49    5.80 
   2  -9  -2  136.19    7.60 
   2  -9  -2  134.49    5.90 
   2  -9  -2  132.19    7.40 
   2  -9  -2  130.59    7.10 
   2  -9  -2  141.79    7.70 
  -2   9   2  135.49    7.30 
  -2   9   2  148.89    6.90 
   1  -9  -2   31.30    4.00 
   1  -9  -2   35.70    4.30 
   1  -9  -2   33.30    4.20 
   1  -9  -2   28.20    3.80 
  -1   9   2   31.20    4.00 
  -1   9   2   32.30    3.50 
   0  -9  -2  182.98    8.90 
   0  -9  -2  192.08    8.60 
   0  -9  -2  203.38    9.00 
   0  -9  -2  199.48    9.30 
   0   9   2  193.08    7.80 
   0   9   2  181.68    8.60 
  -1  -9  -2   49.20    4.90 
  -1  -9  -2   38.30    4.10 
  -1  -9  -2   42.50    4.30 
   1   9   2   37.40    3.00 
   1   9   2   37.60    4.10 
  -2  -9  -2   32.10    3.60 
  -2  -9  -2   36.40    4.00 
  -2  -9  -2   36.10    4.20 
   2   9   2   36.40    3.80 
  -3  -9  -2   17.90    2.80 
  -3  -9  -2   13.40    2.50 
   3   9   2   12.20    2.40 
  -4  -9  -2   -0.70    1.00 
  -4  -9  -2   -0.70    1.00 
   4   9   2   -1.90    0.80 
  -5  -9  -2    0.50    1.20 
  -5  -9  -2    0.30    1.00 
   5   9   2    0.20    1.00 
  -6  -9  -2   11.10    2.20 
  -6  -9  -2   10.60    2.10 
   6   9   2   10.30    1.90 
  -7  -9  -2   13.80    2.30 
  -7  -9  -2   10.90    2.00 
   7   9   2   11.90    1.70 
  -8  -9  -2    7.30    1.80 
  -8  -9  -2    2.70    1.30 
  -9  -9  -2   -0.30    0.90 
 -10  -9  -2    2.50    1.10 
 -11  -9  -2   23.60    2.60 
 -12  -9  -2    2.90    1.20 
 -13  -9  -2   84.59    4.00 
 -14  -9  -2   14.60    1.60 
  15 -10  -2   27.70    5.70 
  15 -10  -2   16.90    4.80 
  15 -10  -2   21.70    5.20 
 -15  10   2   30.00    5.20 
  14 -10  -2    8.20    3.60 
  14 -10  -2   10.40    3.60 
  14 -10  -2   14.10    4.40 
 -14  10   2    7.90    3.40 
  13 -10  -2   -1.60    1.90 
  13 -10  -2   -2.20    2.00 
  13 -10  -2    1.70    2.30 
 -13  10   2    0.70    2.00 
 -13  10   2   -0.40    2.60 
  12 -10  -2   13.50    4.20 
  12 -10  -2   11.10    3.50 
  12 -10  -2    8.80    3.50 
 -12  10   2    9.20    3.20 
 -12  10   2   12.50    3.80 
  11 -10  -2    1.20    2.20 
  11 -10  -2    1.70    2.40 
  11 -10  -2    4.80    2.60 
  11 -10  -2    0.80    2.10 
 -11  10   2    2.40    2.10 
 -11  10   2   -0.50    1.90 
  10 -10  -2    2.10    2.40 
  10 -10  -2    2.40    2.50 
  10 -10  -2    1.80    2.10 
  10 -10  -2    4.60    2.50 
 -10  10   2    3.30    2.10 
 -10  10   2    2.90    2.50 
   9 -10  -2    4.70    2.40 
   9 -10  -2    4.40    2.50 
   9 -10  -2    7.90    2.90 
  -9  10   2    9.20    2.70 
  -9  10   2    5.90    2.80 
   8 -10  -2   92.99    7.30 
   8 -10  -2   88.59    6.60 
   8 -10  -2   83.89    6.10 
  -8  10   2   72.99    7.60 
  -8  10   2   79.89    6.20 
   7 -10  -2    9.40    2.80 
   7 -10  -2    8.30    2.80 
   7 -10  -2    5.50    2.90 
  -7  10   2    7.60    2.60 
  -7  10   2    7.60    2.70 
   6 -10  -2   34.90    5.20 
   6 -10  -2   38.60    4.90 
   6 -10  -2   32.90    4.20 
  -6  10   2   39.10    4.70 
  -6  10   2   34.70    5.10 
   5 -10  -2   80.69    5.30 
   5 -10  -2   73.39    5.90 
   5 -10  -2   60.79    6.80 
   5 -10  -2   92.29    6.60 
  -5  10   2   79.99    5.70 
  -5  10   2   78.09    6.20 
   4 -10  -2   12.20    2.80 
   4 -10  -2   16.10    2.80 
   4 -10  -2   13.90    3.30 
   4 -10  -2   18.90    3.70 
  -4  10   2    8.50    2.60 
  -4  10   2   17.80    3.20 
   3 -10  -2  128.59    7.30 
   3 -10  -2  113.79    7.30 
   3 -10  -2  121.19    7.60 
   3 -10  -2  118.69    7.40 
  -3  10   2  134.19    6.90 
  -3  10   2  106.49    7.00 
   2 -10  -2  131.49    7.90 
   2 -10  -2  124.59    7.50 
   2 -10  -2  132.79    7.50 
   2 -10  -2  136.89    8.10 
  -2  10   2  142.39    7.00 
  -2  10   2  130.99    7.50 
   1 -10  -2  174.08    8.40 
   1 -10  -2  152.68    8.60 
   1 -10  -2  157.58    8.30 
   1 -10  -2  151.28    8.50 
  -1  10   2  148.09    7.20 
  -1  10   2  148.59    8.00 
   0 -10  -2    6.90    2.20 
   0 -10  -2    9.30    2.70 
   0 -10  -2    5.10    2.00 
   0 -10  -2    8.60    2.60 
   0  10   2    4.10    1.80 
  -1 -10  -2    3.80    1.90 
  -1 -10  -2    1.40    1.70 
   1  10   2   -0.70    1.40 
  -2 -10  -2   41.00    4.50 
  -2 -10  -2   48.10    4.90 
   2  10   2   41.40    4.50 
  -3 -10  -2   37.30    4.20 
  -3 -10  -2   52.59    5.10 
   3  10   2   41.90    4.30 
  -4 -10  -2    1.00    1.30 
  -4 -10  -2    0.00    1.20 
   4  10   2   -1.00    0.90 
  -5 -10  -2   50.19    4.10 
  -5 -10  -2   59.39    5.20 
   5  10   2   44.30    3.60 
  -6 -10  -2    4.90    1.90 
  -6 -10  -2    0.40    1.10 
   6  10   2    1.60    1.20 
  -7 -10  -2    3.90    1.70 
  -7 -10  -2    2.10    1.40 
   7  10   2    6.50    1.60 
  -8 -10  -2    7.10    2.00 
  -8 -10  -2    9.40    2.20 
  -9 -10  -2   79.09    4.80 
 -10 -10  -2    3.80    1.50 
 -11 -10  -2    3.90    1.50 
 -12 -10  -2    4.10    1.40 
 -13 -10  -2   -0.20    1.00 
 -14 -10  -2   28.20    2.60 
  13 -11  -2    3.70    3.00 
  13 -11  -2    3.20    2.80 
  13 -11  -2    3.80    3.40 
 -13  11   2    4.70    3.20 
 -13  11   2    5.20    3.10 
  12 -11  -2    8.80    3.30 
  12 -11  -2    9.30    3.40 
  12 -11  -2    3.00    2.50 
 -12  11   2    5.80    2.80 
 -12  11   2    4.60    3.20 
  11 -11  -2   -3.90    2.00 
  11 -11  -2    1.70    2.10 
  11 -11  -2    3.00    2.60 
  11 -11  -2   -1.50    1.80 
 -11  11   2    3.80    2.70 
 -11  11   2    0.60    2.60 
  10 -11  -2   41.40    5.80 
  10 -11  -2   52.29    6.40 
  10 -11  -2   34.10    5.70 
 -10  11   2   42.10    6.10 
 -10  11   2   52.69    6.40 
   9 -11  -2    7.80    3.30 
   9 -11  -2   11.30    3.30 
   9 -11  -2    8.10    2.90 
  -9  11   2    2.70    2.50 
  -9  11   2   12.00    3.50 
   8 -11  -2   10.50    3.50 
   8 -11  -2   12.60    3.20 
   8 -11  -2   20.70    4.00 
  -8  11   2   10.80    3.30 
  -8  11   2   10.70    3.00 
   7 -11  -2   23.60    4.90 
   7 -11  -2   23.00    4.00 
   7 -11  -2   20.70    3.90 
  -7  11   2   19.20    3.90 
  -7  11   2   28.10    5.10 
   6 -11  -2   33.10    5.60 
   6 -11  -2   38.90    5.30 
  -6  11   2   32.90    5.10 
  -6  11   2   36.20    5.00 
   5 -11  -2   20.00    4.10 
   5 -11  -2   20.60    4.00 
   5 -11  -2   16.60    3.60 
  -5  11   2   17.20    3.70 
  -5  11   2   12.50    3.40 
   4 -11  -2   39.70    5.30 
   4 -11  -2   45.10    5.80 
   4 -11  -2   27.50    4.80 
  -4  11   2   34.50    5.00 
  -4  11   2   45.60    5.10 
   3 -11  -2   40.10    5.20 
   3 -11  -2   41.50    5.40 
   3 -11  -2   51.49    6.30 
  -3  11   2   51.29    5.30 
  -3  11   2   45.50    5.50 
   2 -11  -2    6.20    2.70 
   2 -11  -2    3.70    2.00 
   2 -11  -2    4.50    2.30 
  -2  11   2    3.20    2.10 
  -2  11   2    3.70    1.80 
   1 -11  -2   25.80    4.30 
   1 -11  -2   36.70    5.00 
   1 -11  -2   34.40    4.60 
   1 -11  -2   37.90    5.00 
  -1  11   2   32.50    4.70 
   0 -11  -2    9.10    2.70 
   0 -11  -2   21.10    3.60 
   0  11   2   10.50    2.70 
  -1 -11  -2   38.30    4.80 
  -1 -11  -2   39.20    4.90 
   1  11   2   40.10    4.70 
  -2 -11  -2   43.10    5.10 
  -2 -11  -2   59.89    5.80 
   2  11   2   53.49    5.30 
  -3 -11  -2   25.40    3.80 
  -3 -11  -2   28.20    4.10 
   3  11   2   26.10    3.70 
  -4 -11  -2    0.20    1.50 
  -4 -11  -2    0.50    1.40 
   4  11   2    2.10    1.50 
  -5 -11  -2   52.09    5.10 
  -5 -11  -2   46.00    4.80 
   5  11   2   49.00    3.90 
  -6 -11  -2   -1.20    1.00 
  -6 -11  -2    1.00    1.50 
   6  11   2    0.50    1.20 
  -7 -11  -2   -1.10    1.40 
  -7 -11  -2    1.90    1.50 
   7  11   2    1.30    1.30 
  -8 -11  -2    8.40    2.30 
  -8 -11  -2    9.70    2.50 
  -9 -11  -2    1.30    1.30 
 -10 -11  -2    8.10    2.00 
 -11 -11  -2    0.40    1.30 
 -12 -11  -2    7.30    1.90 
 -13 -11  -2    8.90    1.90 
  12 -12  -2   -0.30    2.40 
  12 -12  -2    0.80    2.20 
  12 -12  -2    4.10    3.20 
 -12  12   2    3.70    3.30 
 -12  12   2    1.00    2.50 
  11 -12  -2    3.40    3.20 
  11 -12  -2    8.40    3.30 
  11 -12  -2    5.20    3.50 
 -11  12   2    8.20    3.40 
 -11  12   2    4.90    3.00 
  10 -12  -2   -0.10    2.20 
  10 -12  -2   -0.20    2.20 
  10 -12  -2   -0.30    2.70 
 -10  12   2   -0.60    2.20 
 -10  12   2    0.40    2.40 
   9 -12  -2   10.00    3.40 
   9 -12  -2   10.30    3.90 
  -9  12   2   13.90    3.80 
  -9  12   2   13.80    4.00 
   8 -12  -2   22.40    4.50 
   8 -12  -2   15.90    4.10 
  -8  12   2   15.60    3.80 
  -8  12   2   16.80    4.20 
   7 -12  -2    1.70    2.30 
   7 -12  -2    1.40    2.50 
  -7  12   2    0.50    2.30 
  -7  12   2    1.30    2.10 
   6 -12  -2    2.90    2.40 
   6 -12  -2    2.30    2.70 
  -6  12   2    4.50    2.60 
  -6  12   2    4.20    2.40 
   5 -12  -2   44.60    6.70 
   5 -12  -2   61.89    6.90 
  -5  12   2   43.70    5.40 
  -5  12   2   46.60    6.10 
   4 -12  -2   81.19    8.30 
   4 -12  -2   84.59    8.60 
   4 -12  -2   76.49    7.40 
  -4  12   2   69.09    6.60 
  -4  12   2   79.49    7.90 
   3 -12  -2   34.40    5.30 
   3 -12  -2   44.50    5.90 
   3 -12  -2   31.10    4.80 
  -3  12   2   36.80    5.40 
   2 -12  -2   69.19    7.20 
   2 -12  -2   52.49    6.10 
   2 -12  -2   77.69    7.90 
  -2  12   2   59.79    6.40 
   1 -12  -2    9.70    3.00 
   1 -12  -2   10.60    3.00 
  -1  12   2    6.80    2.60 
   0 -12  -2   80.69    6.40 
   0 -12  -2   93.89    6.70 
   0  12   2   86.89    6.40 
  -1 -12  -2    3.40    2.10 
  -1 -12  -2    2.80    2.00 
   1  12   2   -0.30    1.40 
  -2 -12  -2    2.40    1.90 
  -2 -12  -2    6.40    2.50 
   2  12   2    1.50    1.70 
  -3 -12  -2    3.50    2.00 
  -3 -12  -2    4.30    2.20 
   3  12   2    1.80    1.80 
  -4 -12  -2   20.70    3.60 
  -4 -12  -2   15.90    3.30 
   4  12   2   17.00    3.00 
  -5 -12  -2    3.30    1.80 
  -5 -12  -2    0.50    1.70 
   5  12   2    1.00    1.60 
  -6 -12  -2    7.30    2.20 
  -6 -12  -2    5.40    2.40 
   6  12   2    8.20    2.20 
  -7 -12  -2    0.60    1.80 
  -7 -12  -2    3.30    1.70 
  -8 -12  -2   23.20    3.80 
  -8 -12  -2   18.10    3.20 
  -9 -12  -2   23.20    3.50 
 -10 -12  -2    9.70    2.30 
 -11 -12  -2    8.20    2.30 
 -12 -12  -2   46.10    4.40 
  10 -13  -2   35.20    6.70 
  10 -13  -2   40.20    6.40 
 -10  13   2   47.80    7.10 
 -10  13   2   36.60    6.00 
   9 -13  -2   30.30    5.30 
   9 -13  -2   26.80    5.90 
  -9  13   2   35.20    6.10 
  -9  13   2   27.10    5.30 
   8 -13  -2    5.10    3.40 
   8 -13  -2   10.40    3.70 
  -8  13   2    9.30    3.80 
  -8  13   2    3.40    2.80 
   7 -13  -2    5.10    2.80 
   7 -13  -2    2.40    2.80 
  -7  13   2    2.50    2.70 
  -7  13   2   -0.70    2.20 
   6 -13  -2    1.50    2.60 
   6 -13  -2    4.60    3.10 
  -6  13   2    4.10    2.70 
  -6  13   2    4.20    2.80 
   5 -13  -2    1.70    2.40 
   5 -13  -2    4.00    2.40 
  -5  13   2   -1.70    2.10 
   4 -13  -2   13.70    3.70 
   4 -13  -2   19.90    4.90 
  -4  13   2   20.90    4.50 
   3 -13  -2  127.09    8.80 
   3 -13  -2  143.49    9.00 
   3 -13  -2  110.59    8.70 
  -3  13   2  122.69    8.70 
   2 -13  -2    5.90    2.70 
   2 -13  -2    4.60    2.80 
  -2  13   2    5.00    2.90 
   1 -13  -2   16.70    3.80 
   1 -13  -2   15.90    4.00 
  -1  13   2   14.00    3.60 
   0 -13  -2    0.80    1.80 
   0 -13  -2    2.70    2.20 
   0  13   2    2.80    2.10 
  -1 -13  -2    2.80    2.20 
  -1 -13  -2    5.30    2.60 
   1  13   2    0.90    1.80 
  -2 -13  -2   11.00    3.30 
  -2 -13  -2   11.70    3.20 
   2  13   2   11.40    2.90 
  -3 -13  -2    9.70    3.00 
  -3 -13  -2    2.30    2.10 
   3  13   2    4.20    2.10 
  -4 -13  -2    1.80    2.00 
  -4 -13  -2    1.10    1.70 
   4  13   2   -0.20    1.60 
  -5 -13  -2   13.00    3.20 
  -5 -13  -2   10.30    2.80 
   5  13   2   11.60    2.70 
  -6 -13  -2    6.60    2.60 
  -6 -13  -2    2.60    1.80 
   6  13   2    3.70    2.00 
  -7 -13  -2    4.80    2.60 
  -7 -13  -2    7.40    2.60 
  -8 -13  -2    7.20    2.40 
  -8 -13  -2    2.80    2.40 
  -9 -13  -2    0.40    1.70 
 -10 -13  -2  127.59    7.40 
   7 -14  -2    7.60    3.40 
   7 -14  -2    5.10    3.80 
  -7  14   2    9.10    3.90 
   6 -14  -2    7.90    3.60 
   6 -14  -2    8.30    3.90 
  -6  14   2    6.80    3.30 
   5 -14  -2   -1.50    2.10 
   5 -14  -2    4.30    3.00 
  -5  14   2   -0.30    2.30 
   4 -14  -2    3.50    2.60 
  -4  14   2   11.60    3.70 
   3 -14  -2    1.10    2.20 
   3 -14  -2    1.80    2.40 
  -3  14   2   -0.40    1.90 
   2 -14  -2   95.69    9.30 
   2 -14  -2   81.09    8.30 
  -2  14   2   82.19    8.40 
   1 -14  -2    1.90    2.60 
   1 -14  -2    4.50    3.00 
  -1  14   2    2.70    2.40 
   0 -14  -2   -2.10    2.00 
   0 -14  -2    0.40    2.20 
   0  14   2    0.80    1.90 
  -1 -14  -2   29.30    5.30 
  -1 -14  -2   33.00    5.30 
   1  14   2   37.20    5.30 
  -2 -14  -2    8.00    3.20 
  -2 -14  -2   22.80    4.50 
   2  14   2    7.50    2.90 
  -3 -14  -2    0.10    2.10 
  -3 -14  -2   -0.20    2.00 
   3  14   2   -0.60    1.80 
  -4 -14  -2   10.60    3.40 
  -4 -14  -2    9.10    3.30 
   4  14   2    7.50    2.60 
  -5 -14  -2    5.90    2.70 
  -5 -14  -2    3.80    2.70 
   5  14   2    5.80    2.50 
  -6 -14  -2    5.00    2.80 
  -6 -14  -2   15.60    3.70 
  -7 -14  -2   -1.30    2.10 
  -7 -14  -2    0.10    1.70 
   3 -15  -2    2.90    2.50 
   2 -15  -2    2.70    2.70 
   2 -15  -2    0.60    2.60 
  -2  15   2    0.40    2.60 
   1 -15  -2   19.70    4.60 
   1 -15  -2   24.20    5.30 
  -1  15   2   19.20    4.40 
   0 -15  -2    1.40    2.40 
   0 -15  -2   -0.10    2.30 
   0  15   2    2.00    2.30 
  -1 -15  -2    1.60    2.60 
  -1 -15  -2    0.40    2.40 
   1  15   2    0.30    2.40 
  -2 -15  -2   -1.00    2.20 
  -2 -15  -2    1.50    2.30 
   2  15   2    0.00    1.90 
   2  15  -3   14.70    3.80 
  -2 -15   3    9.70    3.50 
  -2 -15   3   13.40    4.10 
   1  15  -3   34.40    5.40 
  -1 -15   3   40.80    6.40 
  -1 -15   3   38.20    6.00 
   0  15  -3    9.10    3.30 
   0 -15   3    4.70    2.80 
   0 -15   3   13.40    4.40 
  -1  15  -3   31.50    5.40 
   1 -15   3   25.20    5.20 
   1 -15   3   32.40    5.70 
  -2  15  -3   42.60    6.40 
   2 -15   3   46.80    6.80 
   2 -15   3   39.40    6.10 
  -7 -14   3    6.70    2.80 
  -7 -14   3    8.50    3.30 
  -6 -14   3    0.80    2.20 
  -6 -14   3    1.50    2.30 
   5  14  -3    1.40    1.70 
  -5 -14   3   -1.00    1.90 
  -5 -14   3   -0.20    2.00 
   4  14  -3   11.60    3.10 
  -4 -14   3    6.10    2.80 
  -4 -14   3   14.90    3.70 
   3  14  -3    8.70    2.90 
  -3 -14   3    6.60    2.90 
  -3 -14   3    3.20    2.60 
   2  14  -3    0.00    1.70 
  -2 -14   3    0.30    2.00 
  -2 -14   3    4.00    2.70 
   1  14  -3    0.70    2.00 
  -1 -14   3   -1.90    1.90 
  -1 -14   3   -0.50    2.10 
   0  14  -3    2.70    2.30 
   0 -14   3    5.80    3.00 
   0 -14   3    7.50    3.10 
  -1  14  -3   -0.10    2.40 
   1 -14   3    0.50    2.30 
   1 -14   3    0.60    2.40 
  -2  14  -3   -0.10    2.10 
   2 -14   3   -2.90    1.90 
   2 -14   3   -2.40    2.00 
  -3  14  -3    6.40    3.00 
   3 -14   3    9.30    3.50 
   3 -14   3    7.90    3.00 
  -4  14  -3   -0.30    2.10 
   4 -14   3    2.10    2.30 
  -5  14  -3   13.90    4.20 
   5 -14   3    7.20    3.30 
   5 -14   3   10.40    4.20 
  -6  14  -3    0.10    2.40 
   6 -14   3   -1.00    2.40 
   6 -14   3   -2.30    2.70 
  -7  14  -3    1.70    2.70 
   7 -14   3    0.40    2.40 
   7 -14   3    0.00    2.70 
 -10 -13   3    7.40    2.30 
  -9 -13   3    1.60    1.80 
  -8 -13   3    0.90    1.80 
  -7 -13   3   18.40    3.70 
  -7 -13   3   13.20    3.10 
   6  13  -3   32.80    3.80 
  -6 -13   3   34.10    4.60 
  -6 -13   3   32.40    4.70 
   5  13  -3    5.20    2.00 
  -5 -13   3    6.40    2.80 
  -5 -13   3    5.80    2.40 
   4  13  -3   34.60    4.30 
  -4 -13   3   28.40    4.60 
  -4 -13   3   26.20    4.40 
   3  13  -3   19.30    3.50 
  -3 -13   3   21.50    4.20 
  -3 -13   3   17.40    3.70 
   2  13  -3   21.00    3.70 
  -2 -13   3   20.30    4.20 
  -2 -13   3   18.10    4.00 
   1  13  -3   17.80    3.70 
  -1 -13   3   22.60    4.40 
  -1 -13   3   24.70    4.50 
   0  13  -3   -1.30    1.50 
   0 -13   3    0.90    2.20 
   0 -13   3    2.50    2.30 
  -1  13  -3   12.20    3.40 
   1 -13   3    6.90    2.70 
   1 -13   3    2.50    2.20 
  -2  13  -3   14.70    3.60 
   2 -13   3    9.40    3.20 
   2 -13   3   12.90    3.60 
  -3  13  -3    5.80    2.60 
   3 -13   3   17.90    4.20 
   3 -13   3   14.00    4.60 
   3 -13   3   21.30    4.60 
  -4  13  -3    3.80    2.40 
   4 -13   3   -1.00    2.20 
   4 -13   3   -0.50    2.10 
  -5  13  -3   18.60    4.20 
   5 -13   3   13.10    3.80 
   5 -13   3   10.00    3.60 
  -6  13  -3   -0.70    1.90 
   6 -13   3    2.30    2.20 
   6 -13   3    0.20    2.60 
  -7  13  -3    3.50    2.60 
  -7  13  -3    5.60    2.90 
   7 -13   3   -1.60    2.30 
   7 -13   3    2.00    2.70 
  -8  13  -3    0.30    2.50 
  -8  13  -3    3.00    2.90 
   8 -13   3   -1.00    2.50 
   8 -13   3    2.90    3.10 
  -9  13  -3    5.70    3.20 
  -9  13  -3   -2.40    2.00 
   9 -13   3   -0.30    2.80 
   9 -13   3    4.40    2.90 
 -12 -12   3   12.10    2.30 
 -11 -12   3    0.00    1.30 
 -10 -12   3    0.80    1.30 
  -9 -12   3   24.40    3.60 
  -8 -12   3    1.20    1.70 
  -8 -12   3   -0.60    1.30 
  -7 -12   3    4.30    1.90 
  -7 -12   3    3.10    2.10 
   6  12  -3   56.79    3.90 
  -6 -12   3   41.80    4.90 
  -6 -12   3   46.30    5.10 
   5  12  -3    5.20    1.90 
  -5 -12   3    5.60    2.40 
  -5 -12   3    5.50    2.20 
   4  12  -3   15.70    3.00 
  -4 -12   3   11.60    2.90 
  -4 -12   3   15.90    3.20 
   3  12  -3   64.99    5.10 
  -3 -12   3   77.29    7.00 
  -3 -12   3   51.39    5.70 
   2  12  -3   -0.10    1.40 
  -2 -12   3   -1.80    1.60 
  -2 -12   3    0.10    1.60 
   1  12  -3   -3.20    1.10 
  -1 -12   3   -1.80    1.20 
  -1 -12   3    2.50    2.20 
   0  12  -3    2.30    1.80 
   0 -12   3    1.20    1.90 
   0 -12   3    5.60    2.60 
  -1  12  -3    5.10    2.40 
   1 -12   3   14.30    3.50 
   1 -12   3    9.00    2.80 
  -2  12  -3    1.30    1.80 
   2 -12   3    3.60    2.20 
   2 -12   3    4.80    2.70 
   2 -12   3    3.50    2.10 
  -3  12  -3   12.10    3.60 
   3 -12   3   10.10    3.10 
   3 -12   3   16.10    4.10 
   3 -12   3    7.70    2.80 
  -4  12  -3    9.90    3.30 
   4 -12   3    8.60    3.20 
   4 -12   3    7.80    3.00 
   4 -12   3    9.60    3.40 
  -5  12  -3    0.70    2.00 
  -5  12  -3    0.20    1.70 
   5 -12   3    1.70    2.30 
   5 -12   3    1.10    2.00 
  -6  12  -3   26.20    4.90 
  -6  12  -3   29.10    4.80 
   6 -12   3   25.90    5.20 
   6 -12   3   24.70    4.70 
  -7  12  -3    1.60    2.20 
  -7  12  -3    0.90    2.20 
   7 -12   3   -1.10    2.10 
   7 -12   3    0.40    2.30 
  -8  12  -3    3.90    3.00 
  -8  12  -3    3.90    2.70 
   8 -12   3    9.90    3.50 
   8 -12   3    2.10    2.70 
  -9  12  -3   10.70    3.40 
  -9  12  -3   10.50    3.60 
   9 -12   3    9.70    4.10 
   9 -12   3    9.10    3.30 
 -10  12  -3   11.80    3.70 
 -10  12  -3   10.50    3.90 
  10 -12   3   15.50    4.20 
  10 -12   3   21.60    5.10 
 -11  12  -3   28.50    5.70 
 -11  12  -3   17.90    4.40 
  11 -12   3   36.20    6.50 
  11 -12   3   30.60    5.50 
 -13 -11   3    0.90    1.10 
 -12 -11   3    5.70    1.70 
 -11 -11   3    1.60    1.20 
 -10 -11   3    7.90    2.10 
  -9 -11   3   10.80    2.40 
  -8 -11   3    2.60    1.80 
  -8 -11   3    2.20    1.60 
  -7 -11   3   -1.40    1.30 
  -7 -11   3    0.10    1.20 
   6  11  -3    0.90    1.10 
  -6 -11   3   -0.40    1.10 
  -6 -11   3   -0.20    1.40 
   5  11  -3    9.40    2.10 
  -5 -11   3   10.20    2.50 
  -5 -11   3    6.50    2.10 
   4  11  -3   24.00    3.30 
  -4 -11   3   13.30    2.80 
  -4 -11   3   16.00    3.10 
   3  11  -3   34.80    4.10 
  -3 -11   3   31.90    4.20 
  -3 -11   3   32.20    4.20 
   2  11  -3   43.00    4.80 
  -2 -11   3   36.20    4.60 
  -2 -11   3   43.50    5.20 
   1  11  -3    1.70    1.60 
  -1 -11   3    1.90    1.80 
  -1 -11   3    1.00    1.80 
   0  11  -3   -1.80    1.30 
   0 -11   3   -1.40    1.30 
   0 -11   3   -0.90    1.40 
  -1  11  -3   18.30    3.40 
   1 -11   3   29.00    4.60 
   1 -11   3   13.40    3.20 
   1 -11   3   20.60    3.70 
  -2  11  -3    2.00    1.80 
   2 -11   3    2.00    2.00 
   2 -11   3    3.10    1.90 
   2 -11   3    4.80    2.60 
  -3  11  -3   12.40    2.80 
  -3  11  -3   16.20    3.60 
   3 -11   3   15.10    3.50 
   3 -11   3   20.40    4.20 
   3 -11   3   26.10    4.20 
  -4  11  -3    2.40    1.90 
  -4  11  -3   -0.70    1.80 
   4 -11   3    4.40    2.40 
   4 -11   3    1.00    2.00 
   4 -11   3    1.40    1.80 
  -5  11  -3   15.70    3.30 
  -5  11  -3   17.20    3.80 
   5 -11   3   11.90    3.30 
   5 -11   3    9.10    3.00 
   5 -11   3   13.80    3.50 
  -6  11  -3    7.50    2.80 
  -6  11  -3    3.90    2.50 
   6 -11   3    5.60    2.80 
   6 -11   3    3.90    2.20 
  -7  11  -3   10.70    3.00 
  -7  11  -3   14.10    3.70 
   7 -11   3   11.20    3.20 
   7 -11   3   13.30    3.30 
   7 -11   3   20.40    4.30 
  -8  11  -3    4.30    2.30 
  -8  11  -3   12.80    3.60 
   8 -11   3    6.40    3.40 
   8 -11   3   13.30    3.20 
   8 -11   3    9.60    3.30 
  -9  11  -3   -1.10    1.80 
  -9  11  -3    0.90    2.40 
   9 -11   3    4.80    2.60 
   9 -11   3    0.40    1.90 
   9 -11   3   -1.50    2.20 
 -10  11  -3    0.40    2.30 
 -10  11  -3    2.70    2.60 
  10 -11   3    3.80    3.50 
  10 -11   3    4.10    2.80 
  10 -11   3    0.00    2.20 
 -11  11  -3    4.30    2.70 
 -11  11  -3    2.90    3.10 
  11 -11   3    4.00    2.80 
  11 -11   3    3.40    2.60 
  11 -11   3    4.60    2.90 
 -12  11  -3   22.30    5.00 
 -12  11  -3   18.60    4.40 
  12 -11   3   22.70    5.40 
  12 -11   3   10.00    3.70 
  12 -11   3   21.40    4.80 
 -13  11  -3   69.29    8.30 
 -13  11  -3   51.49    7.10 
  13 -11   3   66.59    8.50 
  13 -11   3   45.20    6.70 
  13 -11   3   66.19    8.60 
 -14 -10   3    0.90    0.60 
 -13 -10   3    0.50    0.90 
 -12 -10   3    4.00    1.30 
 -11 -10   3    1.90    1.10 
 -10 -10   3   33.30    3.40 
  -9 -10   3   26.20    3.10 
  -8 -10   3   12.40    2.40 
  -8 -10   3    6.60    1.90 
   7  10  -3    0.30    0.90 
  -7 -10   3    1.30    1.30 
  -7 -10   3    0.90    1.20 
   6  10  -3   10.50    1.90 
  -6 -10   3    7.90    2.00 
  -6 -10   3   10.60    2.30 
   5  10  -3   79.09    4.50 
  -5 -10   3   70.39    4.80 
  -5 -10   3   73.99    5.00 
   4  10  -3    4.00    1.60 
  -4 -10   3    3.30    1.50 
  -4 -10   3    4.00    1.80 
   3  10  -3   35.20    3.90 
  -3 -10   3   24.30    3.50 
  -3 -10   3   22.10    3.30 
   2  10  -3    0.60    1.40 
  -2 -10   3   -0.30    1.30 
  -2 -10   3    0.30    1.40 
   1  10  -3   75.29    5.20 
  -1 -10   3   71.09    5.20 
  -1 -10   3   75.19    5.50 
   0  10  -3   17.00    3.10 
   0 -10   3   20.70    3.60 
   0 -10   3   22.40    3.70 
   0 -10   3   23.40    3.60 
  -1  10  -3   21.70    3.70 
  -1  10  -3   19.30    3.00 
   1 -10   3   16.10    3.10 
   1 -10   3   14.70    3.00 
   1 -10   3   24.30    4.10 
  -2  10  -3   -1.00    1.20 
  -2  10  -3    6.80    2.00 
   2 -10   3    4.10    2.00 
   2 -10   3    1.90    1.70 
   2 -10   3    4.90    2.40 
  -3  10  -3   11.00    2.90 
  -3  10  -3   11.60    2.60 
   3 -10   3   13.20    3.00 
   3 -10   3   10.00    2.80 
   3 -10   3   16.20    3.50 
  -4  10  -3   75.49    5.40 
  -4  10  -3   73.79    7.00 
   4 -10   3   72.89    6.00 
   4 -10   3   76.99    7.40 
   4 -10   3   73.29    5.60 
  -5  10  -3    2.50    1.90 
  -5  10  -3    3.60    2.10 
   5 -10   3    1.90    2.00 
   5 -10   3   -2.00    1.30 
   5 -10   3    5.30    1.80 
   5 -10   3   -0.70    1.50 
  -6  10  -3    0.40    1.70 
  -6  10  -3   -0.30    1.60 
   6 -10   3   -1.60    1.20 
   6 -10   3    0.40    1.90 
   6 -10   3    0.50    1.80 
  -7  10  -3    1.60    2.30 
  -7  10  -3    3.30    2.00 
   7 -10   3    5.50    2.60 
   7 -10   3    2.00    1.90 
   7 -10   3    4.60    2.60 
  -8  10  -3   -1.80    1.20 
  -8  10  -3   -1.30    1.70 
   8 -10   3    0.90    1.70 
   8 -10   3    1.10    2.00 
   8 -10   3    0.50    2.40 
  -9  10  -3   -1.80    1.70 
  -9  10  -3    0.20    2.30 
   9 -10   3   -0.70    2.20 
   9 -10   3    0.50    1.80 
   9 -10   3   -1.00    1.30 
 -10  10  -3   22.40    4.70 
 -10  10  -3   17.40    3.80 
  10 -10   3   28.50    4.70 
  10 -10   3   25.80    4.90 
  10 -10   3   13.70    3.40 
 -11  10  -3   14.60    4.20 
 -11  10  -3   10.80    3.50 
  11 -10   3   12.10    3.40 
  11 -10   3   20.50    4.00 
  11 -10   3   20.30    4.40 
 -12  10  -3    0.20    2.60 
 -12  10  -3    5.00    3.00 
  12 -10   3    1.10    2.50 
  12 -10   3    4.80    3.10 
  12 -10   3    3.30    2.80 
 -13  10  -3    0.70    2.90 
 -13  10  -3    4.20    2.80 
  13 -10   3    7.20    3.40 
  13 -10   3    2.20    2.60 
  13 -10   3    0.30    2.70 
 -14  10  -3   46.80    6.90 
  14 -10   3   52.09    7.40 
  14 -10   3   44.30    7.20 
  14 -10   3   52.29    7.30 
 -13  -9   3   38.40    2.20 
 -12  -9   3   19.80    2.10 
 -11  -9   3   -0.20    0.80 
 -10  -9   3    0.70    1.00 
  -9  -9   3   10.60    1.90 
  -8  -9   3    2.20    1.20 
  -8  -9   3    1.70    1.10 
   7   9  -3    2.00    0.90 
  -7  -9   3    2.20    1.40 
  -7  -9   3    1.80    1.10 
   6   9  -3    5.80    1.40 
  -6  -9   3    5.30    1.70 
  -6  -9   3    6.10    1.70 
   5   9  -3   13.20    2.10 
  -5  -9   3   21.70    3.00 
  -5  -9   3   13.30    2.40 
   4   9  -3    0.50    1.10 
  -4  -9   3   -0.10    1.00 
  -4  -9   3    0.50    1.20 
   3   9  -3    6.20    1.90 
  -3  -9   3    6.30    2.00 
  -3  -9   3    8.00    2.00 
   2   9  -3   10.00    2.20 
  -2  -9   3   17.70    2.80 
  -2  -9   3   13.40    2.50 
   1   9  -3   -0.50    1.10 
  -1  -9   3    0.30    1.20 
  -1  -9   3   -0.20    1.40 
  -1  -9   3    0.10    1.10 
   0   9  -3    6.60    1.80 
   0   9  -3    7.00    2.00 
   0  -9   3    6.00    2.10 
   0  -9   3    6.90    2.20 
   0  -9   3    8.50    2.50 
  -1   9  -3    1.40    1.40 
  -1   9  -3    3.40    1.40 
   1  -9   3    3.50    1.70 
   1  -9   3    2.20    1.80 
   1  -9   3    6.40    2.10 
  -2   9  -3    3.10    1.80 
  -2   9  -3    2.70    1.50 
   2  -9   3    2.50    1.70 
   2  -9   3    3.40    1.20 
   2  -9   3    2.70    1.60 
   2  -9   3   -0.70    1.40 
  -3   9  -3   45.50    5.00 
  -3   9  -3   51.69    4.80 
   3  -9   3   51.29    5.60 
   3  -9   3   51.59    5.30 
   3  -9   3   47.70    5.20 
   3  -9   3   53.49    3.70 
  -4   9  -3   12.40    2.60 
  -4   9  -3   14.80    3.10 
   4  -9   3   18.20    3.40 
   4  -9   3   14.50    3.00 
   4  -9   3   18.80    2.80 
   4  -9   3   19.00    3.50 
  -5   9  -3   17.50    3.40 
  -5   9  -3   16.80    3.00 
   5  -9   3   14.40    3.30 
   5  -9   3   13.70    3.00 
   5  -9   3   17.40    2.80 
   5  -9   3   18.60    3.50 
  -6   9  -3   14.40    3.20 
  -6   9  -3   14.10    3.10 
   6  -9   3   13.10    3.20 
   6  -9   3   10.20    2.70 
   6  -9   3   17.20    3.00 
   6  -9   3   13.70    3.40 
  -7   9  -3   -0.10    1.50 
  -7   9  -3   -0.10    1.80 
   7  -9   3    0.90    1.60 
   7  -9   3   -0.10    1.60 
   7  -9   3    0.40    1.70 
  -8   9  -3   10.30    3.00 
  -8   9  -3    2.60    1.90 
   8  -9   3    6.90    2.50 
   8  -9   3    8.10    2.80 
   8  -9   3    5.50    2.60 
  -9   9  -3    2.00    2.00 
  -9   9  -3    2.40    2.10 
  -9   9  -3    1.80    1.70 
   9  -9   3    3.00    1.90 
   9  -9   3    2.30    1.90 
   9  -9   3    4.60    2.70 
 -10   9  -3   20.80    4.10 
 -10   9  -3   25.70    4.60 
 -10   9  -3   25.40    4.60 
  10  -9   3   23.10    4.40 
  10  -9   3   18.40    3.50 
  10  -9   3   25.20    4.30 
 -11   9  -3   11.70    2.90 
 -11   9  -3   21.40    4.30 
 -11   9  -3   16.80    4.10 
  11  -9   3   20.50    4.50 
  11  -9   3   13.60    3.80 
  11  -9   3   13.60    3.50 
  11  -9   3   20.50    3.80 
 -12   9  -3    1.70    2.20 
 -12   9  -3    4.00    2.40 
 -12   9  -3    6.00    2.60 
  12  -9   3    4.50    2.60 
  12  -9   3    1.20    2.40 
  12  -9   3    5.00    3.20 
 -13   9  -3   15.50    4.30 
 -13   9  -3   11.20    3.40 
  13  -9   3   18.30    4.50 
  13  -9   3   14.30    3.90 
  13  -9   3   13.10    3.90 
 -14   9  -3    5.20    3.20 
 -14   9  -3    4.80    2.80 
  14  -9   3    2.30    2.70 
  14  -9   3    6.50    3.00 
  14  -9   3    1.70    3.10 
 -15   9  -3   17.20    4.30 
 -15   9  -3   31.00    6.00 
  15  -9   3   34.00    6.50 
  15  -9   3   27.80    5.60 
  15  -9   3   25.60    5.00 
 -12  -8   3   37.40    2.10 
 -11  -8   3   25.80    2.00 
 -10  -8   3    0.20    0.80 
  -9  -8   3   -0.50    0.70 
  -8  -8   3    0.00    0.80 
  -8  -8   3    2.20    1.10 
   7   8  -3   10.50    1.20 
  -7  -8   3    9.10    1.70 
  -7  -8   3   12.50    2.00 
   6   8  -3   42.10    2.60 
  -6  -8   3   43.90    3.20 
  -6  -8   3   38.80    2.90 
   5   8  -3    0.00    0.80 
  -5  -8   3   -0.80    0.80 
  -5  -8   3    1.00    1.10 
   4   8  -3    0.70    0.90 
  -4  -8   3    0.70    0.90 
  -4  -8   3    0.70    1.10 
   3   8  -3   82.19    4.50 
  -3  -8   3   84.49    4.70 
  -3  -8   3   84.69    4.80 
   2   8  -3   50.49    3.70 
   2   8  -3   57.09    3.00 
  -2  -8   3   56.29    4.20 
  -2  -8   3   49.40    3.70 
  -2  -8   3   47.00    3.70 
   1   8  -3    2.90    1.10 
   1   8  -3    2.70    1.40 
  -1  -8   3    4.40    1.90 
  -1  -8   3    3.10    1.40 
  -1  -8   3    3.20    1.40 
   0   8  -3   55.09    3.50 
   0   8  -3   51.39    4.00 
   0  -8   3   49.20    4.00 
   0  -8   3   56.19    4.30 
   0  -8   3   56.49    4.10 
  -1   8  -3  259.37    9.70 
  -1   8  -3  255.57   10.40 
   1  -8   3  258.07   10.30 
   1  -8   3  279.87   11.10 
   1  -8   3  281.57   10.90 
  -2   8  -3    2.40    1.40 
  -2   8  -3    3.00    1.80 
  -2   8  -3    3.70    1.60 
   2  -8   3    2.10    1.60 
   2  -8   3    0.90    1.20 
   2  -8   3    4.70    1.40 
   2  -8   3    0.30    1.30 
  -3   8  -3   32.70    4.10 
  -3   8  -3   29.20    3.60 
  -3   8  -3   28.30    3.80 
   3  -8   3   25.50    3.60 
   3  -8   3   35.40    3.40 
   3  -8   3   31.40    4.30 
   3  -8   3   26.60    3.60 
  -4   8  -3    5.90    2.10 
  -4   8  -3    1.40    1.40 
  -4   8  -3    2.40    1.70 
   4  -8   3    3.60    1.70 
   4  -8   3    1.50    1.20 
   4  -8   3    3.50    1.80 
   4  -8   3    1.40    1.60 
  -5   8  -3    0.30    1.50 
  -5   8  -3    0.00    1.50 
  -5   8  -3    4.00    1.80 
   5  -8   3    2.40    1.50 
   5  -8   3    0.50    1.20 
   5  -8   3    5.10    2.10 
   5  -8   3    1.40    1.40 
  -6   8  -3    2.90    1.70 
  -6   8  -3    4.20    1.90 
  -6   8  -3    3.70    1.70 
   6  -8   3    1.00    1.30 
   6  -8   3    2.20    2.00 
   6  -8   3    2.30    1.60 
   6  -8   3    2.40    1.80 
  -7   8  -3   38.20    4.60 
  -7   8  -3   35.20    4.70 
  -7   8  -3   34.10    4.70 
   7  -8   3   42.40    5.20 
   7  -8   3   39.70    4.60 
   7  -8   3   42.40    4.70 
  -8   8  -3   18.60    3.50 
  -8   8  -3   12.80    3.00 
  -8   8  -3    7.40    2.40 
   8  -8   3   14.60    3.00 
   8  -8   3   16.60    3.20 
   8  -8   3   15.20    3.60 
  -9   8  -3   24.20    4.20 
  -9   8  -3   15.80    3.30 
  -9   8  -3   16.70    3.30 
   9  -8   3   14.70    3.50 
   9  -8   3   21.80    3.50 
   9  -8   3   11.20    2.90 
 -10   8  -3   17.40    3.40 
 -10   8  -3   19.10    3.80 
 -10   8  -3   30.00    4.70 
  10  -8   3   18.10    3.90 
  10  -8   3   14.70    3.10 
  10  -8   3   15.60    3.30 
 -11   8  -3   20.80    3.90 
 -11   8  -3   10.00    3.20 
 -11   8  -3   16.40    3.70 
  11  -8   3   17.00    3.30 
  11  -8   3   17.00    3.80 
  11  -8   3   12.20    3.40 
  11  -8   3    8.30    3.20 
 -12   8  -3    1.80    2.10 
 -12   8  -3   -0.50    1.90 
 -12   8  -3    1.50    2.20 
  12  -8   3    5.70    2.60 
  12  -8   3   -1.70    2.00 
  12  -8   3    3.80    2.60 
 -13   8  -3   68.59    7.70 
 -13   8  -3   53.59    6.20 
  13  -8   3   63.29    7.80 
  13  -8   3   62.09    7.20 
  13  -8   3   63.29    7.10 
 -14   8  -3   84.49    8.50 
 -14   8  -3   82.49    7.90 
  14  -8   3   84.79    8.60 
  14  -8   3   66.89    8.50 
  14  -8   3   68.09    7.50 
 -15   8  -3    1.50    2.40 
 -15   8  -3    5.70    2.80 
  15  -8   3    1.50    2.30 
  15  -8   3   -1.90    1.80 
  15  -8   3   -0.20    2.50 
 -16   8  -3    1.70    2.40 
 -16   8  -3    2.40    2.40 
  16  -8   3    2.50    3.00 
  16  -8   3   -0.60    2.30 
  16  -8   3    3.70    2.70 
 -12  -7   3    0.90    0.40 
 -11  -7   3   37.10    2.00 
 -11  -7   3   38.80    2.10 
 -10  -7   3   53.59    2.70 
 -10  -7   3   58.19    2.80 
  -9  -7   3   16.70    1.80 
  -9  -7   3   20.30    2.00 
  -8  -7   3    2.90    1.00 
  -8  -7   3    1.50    0.90 
  -8  -7   3    2.30    1.00 
  -7  -7   3    0.70    0.80 
  -7  -7   3    1.30    0.80 
  -7  -7   3    1.30    0.90 
   6   7  -3   42.30    2.30 
  -6  -7   3   38.40    2.60 
  -6  -7   3   46.70    2.90 
  -6  -7   3   42.70    2.90 
   5   7  -3    0.90    0.80 
  -5  -7   3    0.00    0.80 
  -5  -7   3    1.00    0.90 
  -5  -7   3   -0.30    0.80 
   4   7  -3   47.60    3.00 
  -4  -7   3   46.30    3.20 
  -4  -7   3   41.40    3.00 
  -4  -7   3   46.90    3.00 
   3   7  -3   36.70    1.70 
   3   7  -3   33.90    2.60 
  -3  -7   3   36.30    2.80 
  -3  -7   3   39.90    3.00 
  -3  -7   3   38.10    3.60 
  -3  -7   3   34.30    3.30 
   2   7  -3    7.30    1.60 
   2   7  -3    7.50    1.30 
  -2  -7   3    5.10    1.50 
  -2  -7   3    6.10    1.60 
  -2  -7   3    5.50    1.70 
  -2  -7   3   10.90    2.20 
   1   7  -3   15.00    2.30 
   1   7  -3    9.30    1.60 
   1   7  -3   11.80    2.10 
  -1  -7   3   11.60    2.10 
  -1  -7   3   10.90    2.00 
  -1  -7   3   10.40    2.30 
  -1  -7   3   12.70    2.20 
   0   7  -3   54.59    3.40 
   0   7  -3   56.19    3.80 
   0   7  -3   59.39    3.90 
   0  -7   3   57.69    3.90 
   0  -7   3   55.39    4.10 
   0  -7   3   52.39    3.60 
  -1   7  -3   70.49    4.60 
  -1   7  -3   71.99    4.10 
  -1   7  -3   80.69    4.70 
   1  -7   3   70.29    3.50 
   1  -7   3   71.29    4.40 
   1  -7   3   80.09    5.00 
   1  -7   3   77.89    4.70 
  -2   7  -3    8.40    2.00 
  -2   7  -3    6.90    1.70 
  -2   7  -3    6.70    2.00 
   2  -7   3    7.90    2.10 
   2  -7   3    6.60    1.50 
   2  -7   3    4.80    1.60 
   2  -7   3    3.50    1.50 
  -3   7  -3  112.69    6.00 
  -3   7  -3  105.69    5.50 
  -3   7  -3   98.39    5.80 
   3  -7   3  110.19    5.70 
   3  -7   3  108.09    6.20 
   3  -7   3  109.49    6.00 
   3  -7   3  105.09    5.10 
  -4   7  -3   11.40    2.50 
  -4   7  -3    9.20    2.20 
  -4   7  -3    9.30    2.20 
   4  -7   3   10.80    2.10 
   4  -7   3    8.40    2.20 
   4  -7   3   10.70    2.50 
   4  -7   3    9.20    2.50 
  -5   7  -3   31.10    3.80 
  -5   7  -3   29.80    3.60 
  -5   7  -3   30.90    3.90 
   5  -7   3   24.80    3.60 
   5  -7   3   29.30    3.40 
   5  -7   3   26.30    3.50 
   5  -7   3   29.30    3.90 
  -6   7  -3   58.19    4.30 
  -6   7  -3   63.89    4.80 
  -6   7  -3   61.59    4.70 
   6  -7   3   60.79    4.40 
   6  -7   3   58.99    4.80 
   6  -7   3   54.59    4.50 
   6  -7   3   58.59    4.30 
  -7   7  -3   74.69    5.30 
  -7   7  -3   78.09    5.20 
  -7   7  -3   75.19    5.30 
   7  -7   3   67.39    4.90 
   7  -7   3   59.69    4.60 
   7  -7   3   68.59    5.20 
   7  -7   3   65.39    5.20 
  -8   7  -3   16.10    3.10 
  -8   7  -3   16.80    3.30 
  -8   7  -3   18.60    3.30 
   8  -7   3   14.80    3.30 
   8  -7   3   11.90    2.50 
   8  -7   3   13.20    2.70 
  -9   7  -3    9.80    2.60 
  -9   7  -3   11.70    2.90 
  -9   7  -3    6.00    2.20 
   9  -7   3    1.90    2.10 
   9  -7   3    4.90    2.10 
   9  -7   3    7.70    2.40 
 -10   7  -3   81.59    5.70 
 -10   7  -3   69.79    5.70 
 -10   7  -3   85.19    6.10 
  10  -7   3   65.99    6.60 
  10  -7   3   79.79    5.40 
  10  -7   3   75.99    7.10 
 -11   7  -3   15.20    3.50 
 -11   7  -3   13.10    3.30 
 -11   7  -3   14.20    3.10 
  11  -7   3   11.60    3.00 
  11  -7   3   12.70    3.60 
  11  -7   3   14.80    2.80 
  11  -7   3   17.30    3.60 
 -12   7  -3   43.70    5.70 
 -12   7  -3   24.50    4.20 
 -12   7  -3   27.40    4.70 
  12  -7   3   32.30    5.40 
  12  -7   3   38.20    5.40 
  12  -7   3   26.10    4.40 
 -13   7  -3   33.40    5.20 
 -13   7  -3   36.40    5.10 
  13  -7   3   42.10    6.50 
  13  -7   3   41.20    5.80 
  13  -7   3   31.50    4.90 
 -14   7  -3    0.60    2.00 
 -14   7  -3   -0.40    1.90 
  14  -7   3    5.50    2.90 
  14  -7   3    2.30    2.20 
  14  -7   3   -1.20    1.70 
 -15   7  -3    2.10    2.00 
 -15   7  -3    3.60    2.60 
  15  -7   3    1.00    2.30 
  15  -7   3    2.90    2.30 
  15  -7   3   -1.70    1.80 
 -16   7  -3    2.20    2.40 
 -16   7  -3    1.90    2.20 
  16  -7   3   -3.20    2.20 
  16  -7   3    2.00    2.50 
  16  -7   3   -0.80    1.90 
 -17   7  -3    8.50    3.60 
 -17   7  -3    5.50    2.90 
  17  -7   3    3.60    2.80 
  17  -7   3    9.10    4.20 
  17  -7   3    4.80    3.00 
 -11  -6   3    6.90    0.70 
 -10  -6   3   15.40    1.30 
 -10  -6   3   14.20    1.20 
  -9  -6   3    2.50    0.80 
  -9  -6   3    2.80    0.80 
  -8  -6   3    7.20    1.00 
  -8  -6   3    8.60    1.20 
  -8  -6   3    5.10    1.00 
  -7  -6   3   19.40    1.50 
  -7  -6   3   18.10    1.90 
  -7  -6   3   17.50    1.80 
   6   6  -3   74.19    2.90 
   6   6  -3   79.39    2.90 
  -6  -6   3   77.99    3.60 
  -6  -6   3   79.59    3.30 
  -6  -6   3   80.09    3.70 
   5   6  -3   19.00    1.80 
  -5  -6   3   16.10    1.90 
  -5  -6   3   11.50    1.60 
  -5  -6   3   20.10    2.00 
   4   6  -3    1.40    0.80 
  -4  -6   3    1.00    0.90 
  -4  -6   3    0.40    0.70 
  -4  -6   3    0.60    0.80 
   3   6  -3    7.60    1.50 
   3   6  -3    9.20    0.80 
  -3  -6   3    4.80    1.20 
  -3  -6   3    5.40    1.30 
  -3  -6   3   12.40    2.00 
  -3  -6   3    7.10    1.60 
   2   6  -3  208.08    7.60 
   2   6  -3  200.58    6.60 
  -2  -6   3  215.58    7.90 
  -2  -6   3  207.18    7.90 
  -2  -6   3  209.28    7.80 
  -2  -6   3  199.28    7.40 
   1   6  -3   41.40    3.00 
   1   6  -3   45.00    2.60 
   1   6  -3   42.70    3.00 
  -1  -6   3   49.80    3.40 
  -1  -6   3   47.10    3.30 
  -1  -6   3   42.90    3.00 
  -1  -6   3   49.70    3.30 
   0   6  -3  233.68    8.70 
   0   6  -3  243.98    8.90 
   0   6  -3  238.58    8.20 
   0  -6   3  247.88    8.70 
   0  -6   3  220.38    8.70 
   0  -6   3  231.48    8.90 
  -1   6  -3  240.38    9.20 
  -1   6  -3  255.27    9.50 
  -1   6  -3  257.37    8.90 
   1  -6   3  252.57    9.60 
   1  -6   3  247.78    9.10 
   1  -6   3  257.27    9.60 
   1  -6   3  261.17    8.30 
  -2   6  -3  196.18    8.10 
  -2   6  -3  181.58    7.40 
  -2   6  -3  194.58    7.90 
   2  -6   3  186.68    7.60 
   2  -6   3  194.48    7.00 
   2  -6   3  194.88    8.00 
   2  -6   3  186.38    8.00 
  -3   6  -3   20.70    2.70 
  -3   6  -3   20.90    2.80 
  -3   6  -3   21.60    3.00 
   3  -6   3   19.80    2.60 
   3  -6   3   17.80    2.80 
   3  -6   3   19.40    2.40 
   3  -6   3   20.20    2.80 
  -4   6  -3   68.19    4.20 
  -4   6  -3   65.39    4.30 
  -4   6  -3   61.39    4.30 
   4  -6   3   61.59    3.80 
   4  -6   3   67.89    4.50 
   4  -6   3   59.29    4.30 
   4  -6   3   52.19    3.80 
  -5   6  -3    3.30    1.40 
  -5   6  -3    6.00    1.90 
  -5   6  -3    2.70    1.50 
   5  -6   3    2.30    1.30 
   5  -6   3    4.00    1.60 
   5  -6   3    4.90    1.70 
   5  -6   3    2.60    1.50 
  -6   6  -3   15.50    2.90 
  -6   6  -3   13.00    2.60 
  -6   6  -3    7.40    1.90 
   6  -6   3   12.50    2.60 
   6  -6   3    9.10    2.10 
   6  -6   3    8.40    2.00 
   6  -6   3    8.90    2.20 
  -7   6  -3    9.10    2.20 
  -7   6  -3    8.50    2.20 
  -7   6  -3   10.20    2.50 
   7  -6   3   11.20    2.40 
   7  -6   3    6.30    2.00 
   7  -6   3   10.70    2.30 
   7  -6   3   10.50    2.40 
  -8   6  -3    5.30    2.00 
  -8   6  -3    5.10    1.90 
  -8   6  -3    1.40    1.60 
   8  -6   3    4.10    1.80 
   8  -6   3    5.70    2.10 
   8  -6   3    2.80    1.50 
  -9   6  -3    5.20    2.00 
  -9   6  -3    9.90    2.50 
  -9   6  -3    1.90    1.60 
   9  -6   3    5.00    2.00 
   9  -6   3    4.20    2.00 
   9  -6   3    3.20    1.60 
 -10   6  -3   69.19    5.40 
 -10   6  -3   74.79    5.50 
 -10   6  -3   65.09    5.00 
  10  -6   3   65.89    6.80 
  10  -6   3   74.79    5.60 
  10  -6   3   73.69    5.60 
  10  -6   3   84.59    5.00 
 -11   6  -3   74.89    5.70 
 -11   6  -3   65.29    6.30 
 -11   6  -3   49.20    5.30 
  11  -6   3   58.09    5.90 
  11  -6   3   56.99    6.10 
  11  -6   3   54.09    6.30 
 -12   6  -3   12.10    2.90 
 -12   6  -3   12.90    3.30 
  12  -6   3   17.20    3.70 
  12  -6   3   11.60    2.90 
  12  -6   3    9.20    3.20 
 -13   6  -3   45.30    5.30 
 -13   6  -3   34.00    4.90 
  13  -6   3   43.40    5.40 
  13  -6   3   50.19    6.20 
  13  -6   3   60.19    7.20 
 -14   6  -3   16.80    3.80 
 -14   6  -3   12.80    3.40 
  14  -6   3    2.00    2.40 
  14  -6   3   15.50    3.40 
  14  -6   3   10.80    3.30 
 -15   6  -3   10.00    3.30 
 -15   6  -3    4.40    2.30 
  15  -6   3    7.60    2.70 
  15  -6   3    7.90    3.20 
  15  -6   3    9.20    3.40 
 -16   6  -3   48.70    6.40 
 -16   6  -3   47.20    6.00 
  16  -6   3   56.89    6.50 
  16  -6   3   51.19    7.60 
  16  -6   3   52.29    7.30 
 -17   6  -3   11.20    3.60 
 -17   6  -3   31.20    5.30 
  17  -6   3   23.20    5.00 
  17  -6   3   23.50    4.30 
  17  -6   3   28.80    5.90 
 -18   6  -3    0.80    2.40 
  18   5  -3   -1.70    2.50 
  17   5  -3   19.60    5.10 
  16   5  -3    2.00    2.70 
  15   5  -3   58.59    7.50 
  14   5  -3    4.70    3.10 
  13   5  -3   55.39    6.80 
  12   5  -3   16.30    3.70 
  11   5  -3  149.69    7.00 
  11   5  -3  154.28    8.90 
  10   5  -3   49.00    3.40 
 -10  -5   3   52.89    1.90 
   9   5  -3   94.79    4.30 
  -9  -5   3   93.09    3.20 
  -9  -5   3   89.89    3.10 
   8   5  -3  305.97    9.60 
  -8  -5   3  299.67    8.80 
  -8  -5   3  311.67    8.90 
   7   5  -3  161.68    5.30 
  -7  -5   3  155.98    5.20 
  -7  -5   3  150.88    4.20 
  -7  -5   3  141.19    5.00 
   6   5  -3   32.80    1.80 
  -6  -5   3   34.40    1.70 
  -6  -5   3   29.50    1.90 
  -6  -5   3   33.00    1.60 
  -6  -5   3   32.70    1.90 
   5   5  -3   89.69    3.10 
   5   5  -3   93.19    3.30 
  -5  -5   3   84.69    3.70 
  -5  -5   3   87.39    3.80 
  -5  -5   3   94.19    3.40 
   4   5  -3    8.40    1.20 
  -4  -5   3    9.30    1.30 
  -4  -5   3    7.10    1.30 
  -4  -5   3    7.20    1.10 
   3   5  -3    1.70    0.80 
  -3  -5   3    1.90    0.80 
  -3  -5   3    2.90    0.90 
  -3  -5   3    2.90    0.90 
   2   5  -3  192.48    6.10 
   2   5  -3  196.38    6.90 
  -2  -5   3  193.08    7.10 
  -2  -5   3  196.38    7.00 
  -2  -5   3  200.98    6.80 
  -2  -5   3  189.48    7.10 
   1   5  -3   99.09    4.40 
   1   5  -3   90.89    3.80 
   1   5  -3   90.99    4.30 
  -1  -5   3   94.99    4.50 
  -1  -5   3   97.39    4.50 
  -1  -5   3   89.39    4.20 
  -1  -5   3   96.39    4.40 
   0   5  -3  193.68    7.10 
   0   5  -3  180.78    6.50 
   0   5  -3  180.08    6.90 
   0  -5   3  184.28    7.10 
   0  -5   3  184.58    7.20 
   0  -5   3  179.88    6.80 
  -1   5  -3   28.00    2.90 
  -1   5  -3   21.80    2.60 
  -1   5  -3   27.50    2.60 
   1  -5   3   18.50    2.50 
   1  -5   3   25.60    2.60 
   1  -5   3   32.30    3.00 
   1  -5   3   24.10    1.90 
  -2   5  -3  396.26   12.70 
  -2   5  -3  397.16   12.30 
  -2   5  -3  383.36   12.80 
   2  -5   3  394.06   12.40 
   2  -5   3  381.76   12.80 
   2  -5   3  375.46   12.70 
   2  -5   3  371.16   11.70 
  -3   5  -3  263.37    9.40 
  -3   5  -3  258.57    9.70 
  -3   5  -3  249.58    9.50 
   3  -5   3  269.77    9.90 
   3  -5   3  280.67    9.90 
   3  -5   3  270.47    9.50 
   3  -5   3  270.77    9.10 
  -4   5  -3   12.70    2.30 
  -4   5  -3   14.20    2.20 
  -4   5  -3   14.70    2.30 
   4  -5   3   14.20    2.20 
   4  -5   3   11.10    2.10 
   4  -5   3   12.80    2.20 
   4  -5   3   13.80    2.10 
  -5   5  -3  159.28    7.20 
  -5   5  -3  157.98    6.80 
  -5   5  -3  156.48    7.10 
   5  -5   3  157.78    6.90 
   5  -5   3  161.98    7.20 
   5  -5   3  150.68    6.70 
   5  -5   3  164.18    7.30 
  -6   5  -3    6.70    1.90 
  -6   5  -3    6.30    1.70 
  -6   5  -3    5.80    1.70 
   6  -5   3    7.90    1.90 
   6  -5   3    8.00    2.00 
   6  -5   3    6.80    1.80 
   6  -5   3    5.80    1.60 
  -7   5  -3    0.90    1.20 
  -7   5  -3    3.30    1.50 
  -7   5  -3    0.70    1.20 
   7  -5   3    4.70    1.70 
   7  -5   3    1.80    1.30 
   7  -5   3    1.40    1.30 
   7  -5   3    8.20    1.80 
  -8   5  -3   97.89    5.50 
  -8   5  -3   96.29    5.70 
  -8   5  -3   97.89    5.80 
   8  -5   3  100.89    5.30 
   8  -5   3  100.49    5.90 
   8  -5   3   92.49    5.70 
   8  -5   3   92.99    5.60 
  -9   5  -3   53.29    4.10 
  -9   5  -3   53.59    5.30 
  -9   5  -3   48.80    4.80 
   9  -5   3   51.99    5.30 
   9  -5   3   59.69    5.10 
   9  -5   3   61.49    4.70 
   9  -5   3   50.49    3.70 
 -10   5  -3   66.09    4.80 
 -10   5  -3   69.19    5.10 
 -10   5  -3   68.79    5.00 
  10  -5   3   67.39    5.60 
  10  -5   3   66.29    5.20 
  10  -5   3   66.09    4.90 
  10  -5   3   59.49    4.10 
 -11   5  -3   27.80    4.20 
 -11   5  -3   16.70    3.20 
 -11   5  -3   17.90    3.00 
  11  -5   3   23.10    3.70 
  11  -5   3   24.40    4.30 
  11  -5   3   20.20    3.70 
 -12   5  -3   16.10    3.20 
 -12   5  -3   18.50    3.40 
  12  -5   3   14.20    3.50 
  12  -5   3   13.20    3.10 
  12  -5   3   23.90    4.30 
 -13   5  -3   19.00    3.40 
 -13   5  -3   10.70    2.80 
  13  -5   3   17.30    3.70 
  13  -5   3   15.20    3.30 
  13  -5   3   17.80    4.10 
 -14   5  -3   43.00    5.20 
 -14   5  -3   48.10    5.60 
  14  -5   3   37.00    4.70 
  14  -5   3   32.80    5.10 
  14  -5   3   33.70    5.60 
 -15   5  -3   11.50    3.20 
 -15   5  -3   16.40    3.60 
  15  -5   3   16.30    4.00 
  15  -5   3   19.70    3.80 
  15  -5   3   15.30    3.90 
 -16   5  -3    0.80    1.80 
 -16   5  -3    0.00    1.80 
  16  -5   3    1.90    1.90 
  16  -5   3    0.00    1.70 
  16  -5   3    1.70    2.40 
 -17   5  -3    3.20    2.40 
 -17   5  -3    5.70    2.70 
  17  -5   3    2.80    2.40 
  17  -5   3    0.90    2.40 
  17  -5   3    5.70    3.70 
 -18   5  -3   12.50    3.60 
 -18   5  -3    9.10    3.30 
  18  -5   3   11.10    4.60 
  18  -5   3    8.60    3.10 
  18  -5   3   15.70    4.50 
  19   4  -3    6.20    3.50 
  18   4  -3   -0.20    2.60 
  17   4  -3    8.00    3.50 
  16   4  -3    2.10    2.50 
  15   4  -3    0.00    1.90 
  14   4  -3   14.60    3.70 
  14   4  -3   14.50    2.90 
  13   4  -3   -1.40    1.20 
  13   4  -3    3.60    2.40 
  12   4  -3    3.20    1.70 
  12   4  -3    1.20    1.90 
  11   4  -3   41.30    3.90 
  11   4  -3   37.20    5.00 
  10   4  -3  330.47   13.70 
  10   4  -3  322.17   11.20 
   9   4  -3  107.19    5.00 
   9   4  -3  102.79    6.50 
  -9  -4   3  109.59    3.30 
   8   4  -3  108.79    4.70 
   8   4  -3  105.49    6.30 
  -8  -4   3  106.39    3.40 
  -8  -4   3  107.59    3.40 
   7   4  -3    0.50    0.80 
  -7  -4   3    0.40    0.40 
  -7  -4   3   -0.20    0.40 
   6   4  -3  132.29    4.70 
  -6  -4   3  125.59    4.20 
  -6  -4   3  130.59    4.30 
   5   4  -3  673.83   17.50 
   5   4  -3  685.63   18.10 
  -5  -4   3  679.33   17.40 
  -5  -4   3  660.33   18.40 
  -5  -4   3  676.33   18.40 
  -5  -4   3  680.93   17.40 
   4   4  -3    2.10    0.70 
   4   4  -3    3.40    0.70 
  -4  -4   3    2.80    0.80 
  -4  -4   3    2.00    0.60 
  -4  -4   3    2.50    0.70 
   3   4  -3    6.10    1.00 
  -3  -4   3    3.40    0.80 
  -3  -4   3    4.00    0.90 
  -3  -4   3    3.80    0.90 
   2   4  -3  129.29    4.70 
   2   4  -3  123.49    3.90 
  -2  -4   3  111.99    4.60 
  -2  -4   3  120.69    4.70 
  -2  -4   3  118.29    4.40 
  -2  -4   3  121.09    4.70 
   1   4  -3    4.50    0.90 
   1   4  -3    2.70    1.00 
   1   4  -3    3.90    1.00 
  -1  -4   3    2.60    1.00 
  -1  -4   3    3.60    1.10 
  -1  -4   3    6.00    1.20 
  -1  -4   3    3.00    0.90 
   0   4  -3  130.19    5.00 
   0   4  -3  122.99    5.00 
   0   4  -3  115.39    4.50 
   0  -4   3  118.09    4.70 
   0  -4   3  114.69    4.90 
   0  -4   3  116.69    5.00 
  -1   4  -3  102.39    4.60 
  -1   4  -3  103.99    4.40 
  -1   4  -3  107.89    4.70 
   1  -4   3  103.29    4.60 
   1  -4   3  107.09    4.10 
   1  -4   3   98.89    4.40 
   1  -4   3  102.29    4.70 
  -2   4  -3  387.36   12.40 
  -2   4  -3  375.36   12.10 
  -2   4  -3  377.36   11.80 
   2  -4   3  369.06   11.80 
   2  -4   3  392.26   11.60 
   2  -4   3  399.66   12.40 
   2  -4   3  395.76   12.40 
  -3   4  -3  288.77    9.60 
  -3   4  -3  296.47   10.10 
  -3   4  -3  281.27    9.80 
   3  -4   3  291.87   10.00 
   3  -4   3  277.67    9.90 
   3  -4   3  290.27    9.50 
   3  -4   3  298.57    9.70 
  -4   4  -3   62.39    3.80 
  -4   4  -3   65.89    3.90 
  -4   4  -3   64.89    3.60 
   4  -4   3   62.99    3.70 
   4  -4   3   58.29    3.50 
   4  -4   3   66.29    4.00 
   4  -4   3   59.89    3.80 
  -5   4  -3   21.40    2.70 
  -5   4  -3   22.90    2.80 
  -5   4  -3   22.70    2.80 
   5  -4   3   20.20    2.40 
   5  -4   3   15.70    2.50 
   5  -4   3   28.50    3.10 
   5  -4   3   17.80    2.40 
  -6   4  -3    1.20    1.00 
  -6   4  -3    1.60    1.20 
  -6   4  -3    0.80    1.00 
   6  -4   3    1.60    1.10 
   6  -4   3    0.80    1.00 
   6  -4   3   -0.40    1.00 
   6  -4   3   -0.30    0.80 
  -7   4  -3   19.10    2.50 
  -7   4  -3   15.50    2.50 
  -7   4  -3   16.70    2.70 
   7  -4   3   21.50    3.10 
   7  -4   3   19.70    2.50 
   7  -4   3   20.20    2.70 
   7  -4   3   19.00    2.80 
  -8   4  -3    0.30    1.00 
  -8   4  -3   -0.50    0.90 
  -8   4  -3    0.60    1.10 
   8  -4   3   -0.10    1.00 
   8  -4   3   -1.10    0.70 
   8  -4   3    0.00    1.00 
   8  -4   3   -0.20    1.10 
   8  -4   3   -1.70    1.10 
  -9   4  -3   30.20    3.60 
  -9   4  -3   29.00    3.40 
  -9   4  -3   27.60    3.50 
   9  -4   3   22.70    3.20 
   9  -4   3   28.50    3.00 
   9  -4   3   25.40    3.70 
   9  -4   3   24.60    3.60 
 -10   4  -3   30.60    3.80 
 -10   4  -3   31.20    3.80 
 -10   4  -3   28.40    3.50 
  10  -4   3   28.20    3.60 
  10  -4   3   27.50    2.90 
  10  -4   3   24.80    4.20 
  10  -4   3   26.80    3.90 
 -11   4  -3    0.10    1.50 
 -11   4  -3    3.20    1.80 
 -11   4  -3    4.40    1.80 
  11  -4   3    5.00    2.30 
  11  -4   3    4.60    1.90 
  11  -4   3    3.50    1.60 
 -12   4  -3    2.10    1.50 
 -12   4  -3   -1.00    1.30 
  12  -4   3    1.10    1.60 
  12  -4   3    3.40    1.80 
  12  -4   3    3.20    2.20 
 -13   4  -3    1.30    1.40 
 -13   4  -3   -0.90    1.10 
  13  -4   3    0.20    1.70 
  13  -4   3    1.10    1.80 
  13  -4   3    3.40    2.00 
 -14   4  -3   27.70    4.10 
 -14   4  -3   31.50    4.20 
  14  -4   3   41.20    6.10 
  14  -4   3   35.30    5.20 
  14  -4   3   30.80    4.10 
 -15   4  -3    1.40    1.90 
 -15   4  -3    2.40    1.90 
  15  -4   3   -0.80    1.50 
  15  -4   3    2.10    2.10 
  15  -4   3    2.10    2.00 
 -16   4  -3   29.10    4.40 
 -16   4  -3   31.30    4.50 
  16  -4   3   19.30    4.60 
  16  -4   3   22.70    4.50 
  16  -4   3   30.90    4.30 
 -17   4  -3    0.50    1.90 
 -17   4  -3    0.80    1.90 
  17  -4   3    1.20    2.60 
  17  -4   3    1.10    2.10 
  17  -4   3    0.40    1.80 
 -18   4  -3   32.00    5.10 
 -18   4  -3   22.90    4.30 
  18  -4   3   28.80    4.20 
  18  -4   3   28.10    6.00 
  18  -4   3   30.80    5.70 
  19   3  -3   17.50    5.00 
 -19  -3   3   35.50    2.50 
  18   3  -3    1.10    2.90 
 -18  -3   3    2.40    1.10 
  17   3  -3    3.60    2.40 
  17   3  -3    0.20    2.70 
 -17  -3   3    0.30    0.80 
  16   3  -3   28.30    4.40 
  16   3  -3   25.80    5.20 
 -16  -3   3   24.60    2.20 
  15   3  -3   26.60    4.20 
  15   3  -3   30.70    5.30 
 -15  -3   3   25.70    2.00 
  14   3  -3   12.60    2.80 
  14   3  -3   11.80    3.40 
 -14  -3   3   10.40    1.40 
 -14  -3   3   11.00    1.40 
  13   3  -3  137.29    7.20 
  13   3  -3  140.49    8.70 
 -13  -3   3  140.39    4.70 
 -13  -3   3  131.89    4.70 
  12   3  -3   90.19    6.60 
  12   3  -3   87.19    5.40 
 -12  -3   3   88.29    3.30 
 -12  -3   3   86.39    3.30 
  11   3  -3  316.17   11.60 
  11   3  -3  321.17   13.70 
 -11  -3   3  320.37    9.10 
 -11  -3   3  324.27    9.10 
  10   3  -3  198.68    8.10 
  10   3  -3  201.58    9.80 
 -10  -3   3  205.18    5.90 
 -10  -3   3  201.98    5.90 
   9   3  -3   41.30    3.10 
   9   3  -3   45.60    4.80 
  -9  -3   3   41.70    1.60 
  -9  -3   3   41.30    1.70 
   8   3  -3  252.47    8.70 
   8   3  -3  243.38   10.40 
  -8  -3   3  256.07    6.90 
  -8  -3   3  247.28    6.90 
   7   3  -3   23.60    3.20 
   7   3  -3   22.80    2.30 
  -7  -3   3   23.30    1.10 
  -7  -3   3   21.10    1.10 
   6   3  -3   77.49    3.50 
   6   3  -3   73.49    4.60 
  -6  -3   3   75.39    2.60 
  -6  -3   3   77.29    2.60 
   5   3  -3  459.65   12.40 
  -5  -3   3  417.86   11.80 
  -5  -3   3  433.26   11.90 
   4   3  -3    0.20    0.40 
   4   3  -3   -0.30    0.50 
  -4  -3   3    0.10    0.30 
  -4  -3   3   -0.70    0.40 
  -4  -3   3    0.00    0.40 
  -4  -3   3   -0.30    0.30 
   3   3  -3   34.00    1.70 
  -3  -3   3   35.90    1.60 
  -3  -3   3   30.50    1.80 
  -3  -3   3   34.60    1.80 
   2   3  -3    3.60    0.90 
   2   3  -3    3.10    0.60 
  -2  -3   3    3.60    0.80 
  -2  -3   3    3.90    0.80 
  -2  -3   3    4.20    0.90 
   1   3  -3   78.09    3.50 
   1   3  -3   87.99    3.30 
   1   3  -3   95.89    3.70 
  -1  -3   3   94.49    3.80 
  -1  -3   3   92.39    3.70 
  -1  -3   3   94.49    3.50 
  -1  -3   3   92.09    3.70 
   0   3  -3   98.89    4.10 
   0   3  -3  101.99    4.10 
   0   3  -3   98.79    3.80 
   0  -3   3  105.49    4.30 
   0  -3   3  103.29    4.10 
   0  -3   3   97.29    3.90 
  -1   3  -3  173.38    6.10 
  -1   3  -3  165.68    6.00 
  -1   3  -3  162.28    5.70 
   1  -3   3  164.38    5.80 
   1  -3   3  173.78    5.60 
   1  -3   3  161.38    6.10 
   1  -3   3  168.98    6.10 
  -2   3  -3  287.67    8.90 
  -2   3  -3  293.47    9.20 
  -2   3  -3  275.67    9.20 
   2  -3   3  279.87    8.90 
   2  -3   3  288.47    9.30 
   2  -3   3  284.47    8.80 
   2  -3   3  255.47    9.00 
  -4   3  -3   38.20    2.70 
  -4   3  -3   42.00    2.70 
  -4   3  -3   35.60    2.70 
   4  -3   3   33.30    2.70 
   4  -3   3   37.40    2.70 
   4  -3   3   40.20    2.70 
   4  -3   3   44.10    2.70 
  -5   3  -3  454.95   14.40 
  -5   3  -3  443.16   13.80 
  -5   3  -3  470.45   14.30 
   5  -3   3  462.75   14.40 
   5  -3   3  458.75   13.70 
   5  -3   3  471.15   14.40 
  -6   3  -3    0.40    0.90 
  -6   3  -3    0.30    0.80 
  -6   3  -3    0.90    0.90 
   6  -3   3    1.10    1.00 
   6  -3   3   -0.10    0.70 
   6  -3   3    0.90    0.90 
   6  -3   3    2.40    1.20 
  -7   3  -3    1.50    1.00 
  -7   3  -3    2.10    1.10 
  -7   3  -3    1.90    1.20 
   7  -3   3    2.30    1.00 
   7  -3   3    1.60    1.20 
   7  -3   3    2.30    1.20 
   7  -3   3    1.60    1.40 
   7  -3   3    1.10    1.00 
  -8   3  -3   22.80    3.10 
  -8   3  -3   21.20    2.60 
  -8   3  -3   24.00    3.00 
   8  -3   3   21.00    2.70 
   8  -3   3   21.20    2.80 
   8  -3   3   23.30    2.40 
   8  -3   3   22.50    3.40 
   8  -3   3   17.70    2.90 
  -9   3  -3   35.10    3.70 
  -9   3  -3   37.30    3.60 
  -9   3  -3   37.20    3.90 
   9  -3   3   30.20    4.00 
   9  -3   3   35.70    2.50 
   9  -3   3   31.60    3.90 
   9  -3   3   27.40    3.30 
 -10   3  -3    1.60    1.20 
 -10   3  -3   -0.90    0.90 
 -10   3  -3   -0.50    1.20 
  10  -3   3    0.50    0.80 
  10  -3   3    0.00    1.10 
  10  -3   3    0.30    1.20 
  10  -3   3    3.40    1.90 
 -11   3  -3  131.09    6.40 
 -11   3  -3  117.49    6.50 
  11  -3   3  121.89    7.20 
  11  -3   3  121.99    7.60 
  11  -3   3  141.99    6.70 
 -12   3  -3   15.60    2.80 
 -12   3  -3    9.40    2.30 
  12  -3   3   12.70    3.20 
  12  -3   3   13.10    2.60 
  12  -3   3   13.90    3.20 
 -13   3  -3   20.20    3.30 
 -13   3  -3   21.60    3.20 
  13  -3   3   18.30    3.60 
  13  -3   3   15.50    3.70 
  13  -3   3   17.10    2.90 
 -14   3  -3   -1.00    1.10 
 -14   3  -3    2.10    1.50 
  14  -3   3   -0.80    1.20 
  14  -3   3    0.00    1.50 
  14  -3   3   -0.50    1.50 
 -15   3  -3    5.50    2.10 
 -15   3  -3    5.00    2.10 
  15  -3   3    5.00    2.40 
  15  -3   3    3.10    2.40 
  15  -3   3    4.80    2.00 
 -16   3  -3    5.90    2.30 
 -16   3  -3    8.60    2.70 
  16  -3   3    7.30    3.00 
  16  -3   3    9.30    3.80 
  16  -3   3    9.10    2.50 
 -17   3  -3   -0.20    1.70 
 -17   3  -3    4.60    2.20 
  17  -3   3    2.50    2.50 
  17  -3   3   -0.20    1.80 
  17  -3   3    1.40    1.50 
 -18   3  -3   11.80    3.10 
 -18   3  -3   12.80    3.00 
  18  -3   3   10.30    4.10 
  18  -3   3   12.70    4.20 
 -19   3  -3   37.00    5.40 
 -19   3  -3   42.90    5.70 
  19  -3   3   42.50    7.40 
  19  -3   3   50.29    7.20 
  19   2  -3   -1.60    2.60 
  19   2  -3   -2.70    2.10 
 -19  -2   3    0.80    1.10 
  18   2  -3   -0.50    2.50 
  18   2  -3    1.00    1.90 
 -18  -2   3    0.20    1.00 
  17   2  -3   10.60    3.30 
  17   2  -3    3.20    2.80 
 -17  -2   3    5.00    1.40 
  16   2  -3    2.30    2.60 
  16   2  -3    1.50    2.00 
  16   2  -3    2.30    2.60 
 -16  -2   3    0.80    1.00 
  15   2  -3   -0.50    2.00 
  15   2  -3   -0.80    1.50 
 -15  -2   3    0.30    0.90 
  14   2  -3    5.00    2.10 
  14   2  -3    1.70    1.90 
 -14  -2   3    6.80    1.30 
  13   2  -3    1.30    1.50 
  13   2  -3    3.60    2.30 
 -13  -2   3    3.90    1.10 
 -13  -2   3    3.00    1.00 
  12   2  -3   98.29    5.80 
 -12  -2   3   95.89    3.90 
 -12  -2   3   92.19    3.90 
  11   2  -3   21.60    3.00 
 -11  -2   3   19.50    1.20 
 -11  -2   3   21.00    1.80 
 -11  -2   3   19.70    1.60 
  10   2  -3    6.50    1.70 
 -10  -2   3    9.80    1.10 
 -10  -2   3   10.90    1.20 
   9   2  -3   -0.50    1.00 
   9   2  -3   -0.90    0.80 
  -9  -2   3    0.00    0.40 
  -9  -2   3   -0.10    0.40 
   8   2  -3   14.00    2.00 
   8   2  -3   10.00    2.20 
  -8  -2   3   12.30    1.00 
  -8  -2   3   11.10    1.00 
   7   2  -3  742.53   21.40 
   7   2  -3  744.03   23.90 
  -7  -2   3  785.12   20.10 
  -7  -2   3  767.32   20.10 
   6   2  -3   34.00    2.30 
   6   2  -3   37.20    3.60 
  -6  -2   3   35.60    1.50 
   5   2  -3   73.49    4.00 
   5   2  -3   73.09    3.30 
  -5  -2   3   67.39    2.40 
  -5  -2   3   70.29    2.40 
   4   2  -3   33.20    2.60 
   4   2  -3   35.30    1.40 
   4   2  -3   37.00    2.00 
  -4  -2   3   38.00    1.60 
  -4  -2   3   38.00    1.60 
   3   2  -3 2111.59   54.09 
  -3  -2   3 2146.49   55.19 
  -3  -2   3 2148.19   53.49 
  -3  -2   3 2152.78   53.49 
  -3  -2   3 2153.78   55.19 
   2   2  -3    0.70    0.50 
   2   2  -3    0.80    0.30 
  -2  -2   3    0.90    0.50 
  -2  -2   3    0.10    0.50 
  -2  -2   3    0.70    0.50 
   1   2  -3  165.18    5.20 
   1   2  -3  159.08    4.90 
   1   2  -3  179.88    5.40 
  -1  -2   3  163.58    5.40 
  -1  -2   3  168.78    5.30 
  -1  -2   3  152.68    5.10 
   0   2  -3  309.47    8.70 
   0   2  -3  291.17    9.00 
   0   2  -3  303.47    8.90 
   0  -2   3  308.07    9.10 
   0  -2   3  304.67    9.00 
   0  -2   3  293.87    9.00 
   0  -2   3  309.57    8.80 
  -1   2  -3   15.20    1.70 
  -1   2  -3   16.90    1.70 
  -1   2  -3   15.30    1.60 
   1  -2   3   19.90    1.80 
   1  -2   3   17.90    1.80 
   1  -2   3   20.60    1.80 
  -2   2  -3    3.60    1.00 
  -2   2  -3    1.40    0.80 
  -2   2  -3    1.30    0.80 
   2  -2   3    2.20    0.90 
   2  -2   3    1.30    0.80 
   2  -2   3    2.80    0.90 
   2  -2   3    2.10    0.80 
  -3   2  -3    6.40    1.20 
  -3   2  -3    3.00    1.00 
  -3   2  -3    1.80    0.90 
   3  -2   3    3.50    1.00 
   3  -2   3    4.90    1.10 
   3  -2   3    4.70    1.20 
   3  -2   3    4.70    1.10 
  -4   2  -3    1.20    0.90 
  -4   2  -3    3.50    1.00 
  -4   2  -3    2.40    1.10 
   4  -2   3    3.80    1.30 
   4  -2   3    3.20    1.20 
   4  -2   3    3.60    1.10 
   4  -2   3    3.40    0.90 
  -5   2  -3   51.69    2.90 
  -5   2  -3   54.19    3.10 
  -5   2  -3   52.89    3.20 
   5  -2   3   57.09    3.20 
   5  -2   3   49.50    2.80 
   5  -2   3   56.39    3.40 
   5  -2   3   54.29    3.10 
  -6   2  -3    1.30    0.80 
  -6   2  -3    2.20    1.00 
  -6   2  -3    1.20    0.90 
  -6   2  -3    0.90    0.90 
   6  -2   3   -0.10    1.10 
   6  -2   3    0.00    0.70 
   6  -2   3    1.60    1.00 
   6  -2   3    3.00    1.40 
   6  -2   3    2.00    0.90 
  -7   2  -3   47.40    3.00 
  -7   2  -3   50.89    3.20 
  -7   2  -3   43.70    3.10 
  -7   2  -3   53.69    3.40 
   7  -2   3   54.29    3.30 
   7  -2   3   46.20    3.70 
   7  -2   3   46.50    2.60 
   7  -2   3   50.49    3.20 
   7  -2   3   48.70    3.50 
  -8   2  -3   10.40    1.90 
  -8   2  -3    9.30    1.70 
  -8   2  -3   19.00    2.50 
  -8   2  -3   10.80    1.90 
   8  -2   3   14.00    2.10 
   8  -2   3   15.20    1.70 
   8  -2   3   13.30    2.40 
   8  -2   3   13.50    2.60 
  -9   2  -3   59.39    3.60 
  -9   2  -3   64.39    3.90 
  -9   2  -3   53.29    3.70 
  -9   2  -3   60.69    3.80 
   9  -2   3   53.49    4.40 
   9  -2   3   49.20    4.80 
   9  -2   3   61.19    3.80 
   9  -2   3   54.79    2.80 
 -10   2  -3   -1.00    0.70 
 -10   2  -3    1.60    1.20 
 -10   2  -3   -1.30    0.80 
  10  -2   3   -0.90    1.40 
  10  -2   3    0.60    1.30 
  10  -2   3   -0.10    1.00 
 -11   2  -3    0.10    0.90 
 -11   2  -3   -0.10    0.90 
  11  -2   3   -1.80    1.00 
  11  -2   3    0.80    1.40 
  11  -2   3   -0.60    0.90 
 -12   2  -3   20.60    2.90 
 -12   2  -3   15.90    2.70 
  12  -2   3   21.10    3.60 
  12  -2   3   15.20    3.40 
  12  -2   3   18.20    2.80 
 -13   2  -3    4.90    1.80 
 -13   2  -3   10.60    2.40 
  13  -2   3    1.50    1.70 
  13  -2   3    8.80    2.10 
  13  -2   3    5.00    2.50 
 -14   2  -3   45.00    4.60 
 -14   2  -3   36.10    4.20 
  14  -2   3   43.30    5.50 
  14  -2   3   46.90    6.40 
  14  -2   3   46.20    4.30 
 -15   2  -3   -1.60    1.20 
 -15   2  -3   -0.10    1.40 
  15  -2   3   -0.70    1.20 
  15  -2   3   -0.80    1.40 
  15  -2   3   -0.80    1.90 
 -16   2  -3   32.50    4.20 
 -16   2  -3   33.20    4.40 
  16  -2   3   37.30    5.90 
  16  -2   3   44.00    4.20 
  16  -2   3   35.90    5.40 
 -17   2  -3    8.50    2.70 
 -17   2  -3   13.00    3.00 
  17  -2   3   15.80    4.40 
  17  -2   3    6.80    3.00 
 -18   2  -3   18.50    3.50 
 -18   2  -3   22.70    4.00 
  18  -2   3    8.90    3.80 
  18  -2   3   21.00    5.00 
 -19   2  -3    2.60    2.30 
 -19   2  -3    0.50    1.80 
  19  -2   3    0.00    2.20 
  19  -2   3    2.10    3.10 
  19   1  -3   22.50    4.70 
  19   1  -3    0.90    2.60 
 -19  -1   3   12.40    2.50 
  18   1  -3    2.30    2.70 
  18   1  -3    7.60    2.90 
 -18  -1   3    3.00    1.50 
  17   1  -3   14.30    3.80 
  17   1  -3   14.90    4.10 
 -17  -1   3    9.80    2.10 
  16   1  -3  118.79    7.80 
  16   1  -3  100.99    8.10 
 -16  -1   3  107.69    5.40 
  15   1  -3   15.50    3.30 
  15   1  -3   16.60    3.90 
 -15  -1   3   13.10    2.10 
  14   1  -3  126.19    7.40 
  14   1  -3  116.49    8.00 
 -14  -1   3  114.39    5.30 
  13   1  -3  119.69    7.00 
  13   1  -3  125.39    7.90 
 -13  -1   3  122.39    4.90 
 -13  -1   3  119.59    5.30 
  12   1  -3    2.30    1.70 
  12   1  -3    4.70    2.00 
 -12  -1   3    3.50    1.00 
 -12  -1   3    4.70    1.20 
 -12  -1   3    1.00    0.80 
  11   1  -3  315.07   12.80 
  11   1  -3  295.67   11.30 
 -11  -1   3  300.17    9.40 
 -11  -1   3  288.67    8.70 
 -11  -1   3  274.17    9.30 
  10   1  -3  190.48    9.20 
  10   1  -3  207.58    8.50 
 -10  -1   3  201.58    6.20 
 -10  -1   3  192.48    6.70 
 -10  -1   3  198.18    6.70 
   9   1  -3   45.40    4.60 
   9   1  -3   44.40    4.00 
  -9  -1   3   36.90    2.20 
  -9  -1   3   38.80    1.90 
  -9  -1   3   37.80    2.20 
  -9  -1   3   41.80    1.90 
  -9  -1   3   39.90    1.90 
   8   1  -3  595.44   15.30 
   8   1  -3  594.74   19.60 
   8   1  -3  598.24   15.30 
   8   1  -3  588.84   17.80 
  -8  -1   3  598.34   15.50 
  -8  -1   3  576.74   16.30 
  -8  -1   3  594.24   15.40 
  -8  -1   3  583.84   16.30 
   7   1  -3    1.10    1.00 
   7   1  -3    2.10    0.50 
   7   1  -3    5.20    1.60 
  -7  -1   3    2.50    0.40 
  -7  -1   3    2.60    0.70 
  -7  -1   3    2.40    0.60 
  -7  -1   3    2.90    0.50 
   6   1  -3  152.48    5.90 
   6   1  -3  159.18    4.50 
   6   1  -3  155.68    6.70 
  -6  -1   3  152.78    4.90 
  -6  -1   3  154.98    4.20 
  -6  -1   3  157.28    4.20 
  -6  -1   3  148.39    4.90 
   5   1  -3    7.30    1.40 
   5   1  -3    7.60    0.80 
  -5  -1   3    6.70    0.80 
  -5  -1   3    5.80    0.80 
   4   1  -3   86.89    3.50 
   4   1  -3   82.19    2.70 
   4   1  -3   77.29    3.90 
  -4  -1   3   81.89    2.80 
  -4  -1   3   77.29    2.80 
  -4  -1   3   80.89    2.30 
  -4  -1   3   82.79    2.30 
   3   1  -3   26.40    1.40 
   3   1  -3   30.60    2.10 
  -3  -1   3   27.00    1.40 
  -3  -1   3   27.60    1.20 
  -3  -1   3   27.00    1.20 
   2   1  -3 2714.33   66.89 
   2   1  -3 2618.74   66.09 
  -2  -1   3 2713.83   68.09 
  -2  -1   3 2623.94   66.29 
  -2  -1   3 2593.74   68.09 
   1   1  -3  123.99    4.00 
   1   1  -3  122.89    3.80 
   1   1  -3  122.39    4.00 
  -1  -1   3  123.49    4.00 
  -1  -1   3  122.39    4.00 
  -1  -1   3  124.99    3.90 
   0   1  -3  171.68    5.40 
   0   1  -3  178.08    5.60 
   0  -1   3  179.48    5.40 
   0  -1   3  187.98    5.60 
   0  -1   3  180.48    5.80 
  -1   1  -3    6.30    1.00 
  -1   1  -3    5.30    0.90 
  -1   1  -3    4.30    0.90 
   1  -1   3    6.70    1.10 
   1  -1   3    5.60    1.00 
   1  -1   3    5.60    0.90 
  -2   1  -3    1.20    0.80 
  -2   1  -3    1.80    0.80
[truncated: 1,769,706 more chars]
